# Supplementary material for: [2 + 2 + 1] Cycloaddition of N-tosylhydrazones, tert-butyl nitrite and alkenes: a general and practical access to isoxazolines
Source: Royal Society of Chemistry journal article supplement (doi:10.1039/d1sc02352g), 2021-01-01
Supplement: d1sc02352g1.pdf [file d1sc02352g1.pdf]

## SUPPORTING INFORMATION

# **[2+2+1] Cycloaddition of *N*-Tosylhydrazones, *tert*-Butyl Nitrite and Alkenes: A General and Practical Access to Isoxazolines**

Liang Ma, Feng Jin, Xionglve Cheng, Suyan Tao, Gangzhong Jiang, Xingxing Li,  
Jinwei Yang, Xiaoguang Bao,\* Xiaobing Wan\*

*Key Laboratory of Organic Synthesis of Jiangsu Province, College of Chemistry, Chemical Engineering and*

*Materials Science, Soochow University, Suzhou 215123, P. R. China*

Email: xgbao@suda.edu.cn, wanxb@suda.edu.cn

### **List of Contents**

|                                                                                           |             |
|-------------------------------------------------------------------------------------------|-------------|
| General information                                                                       | <b>S2</b>   |
| Fig. S1 Nitronate detected by LC-HRMS                                                     | <b>S4</b>   |
| Figure S2. Energy profile for the unfavorable cycloaddition of nitronate and <b>2a</b>    | <b>S5</b>   |
| Figure S3. Energy profile (in kcal/mol) for the formation of nitronate with CuCl catalyst | <b>S5</b>   |
| X-Ray diffraction analysis of compound <b>3ab</b>                                         | <b>S6</b>   |
| Compound characterizations                                                                | <b>S8</b>   |
| Spectroscopic data for products                                                           | <b>S36</b>  |
| Computational methods                                                                     | <b>S126</b> |
| Cartesian Coordinates and Energies                                                        | <b>S128</b> |

## General information

Column chromatography was performed on silica gel (300-400 mesh) and reactions were monitored by thin layer chromatography (TLC) using UV light to visualize the course of the reactions.  $^1\text{H}$  NMR (400 MHz),  $^{13}\text{C}$  NMR (100 MHz) and  $^{19}\text{F}$  NMR (376 MHz) spectra were acquired at various field strengths as indicated, and were referenced to  $\text{CHCl}_3$  (7.26 and 77.0 ppm for  $^1\text{H}$  and  $^{13}\text{C}$  respectively) or DMSO (2.50 and 39.6 ppm for  $^1\text{H}$  and  $^{13}\text{C}$  respectively). The spectra were collected at 25 °C.  $^1\text{H}$  NMR coupling constants are reported in Hertz and refer to apparent multiplicities and not true coupling constants. Collection parameters: Relaxation Delay- 1.0; Pulse Width- 10.0; Number of Scans- 1~16; Sweep Width- 3.84~16.19 (20.03) ppm. Data are reported as follows: chemical shift, multiplicity (s = singlet, br s = broad singlet, d = doublet, t = triplet, q = quartet, m = multiplet, dd = doublet of doublet, etc.), coupling constant and integration. All  $^{13}\text{C}$  NMR spectra are  $^1\text{H}$  decoupled. Collection parameters: Relaxation Delay- 2.0; Pulse Width- 8.8; Number of Scans- 10~100; Sweep Width- -19.47~219.45 (238.90) ppm. IR and HRMS were performed by the State-authorized Analytical Center in Soochow University.

### General procedure for “one-pot” [3+2] cycloaddition of N-tosylhydrazone, TBN and alkenes

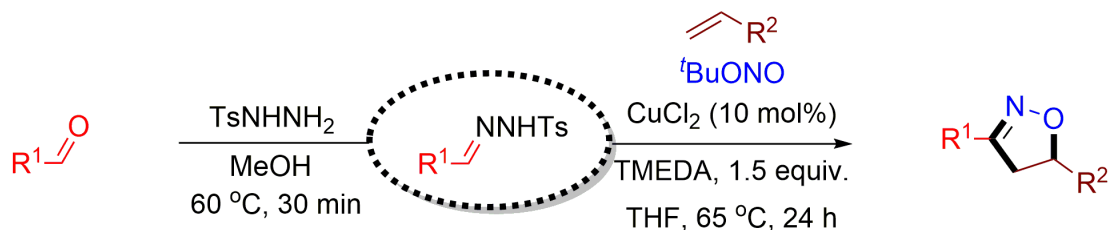

To a test tube with magnetic stirring bar, aldehyde (0.65 mmol), tosylhydrazide (0.7 mmol) and MeOH (1 mL) were added, the mixture was stirred at 60 °C for 30 minutes. After the solvent was removed under vacuum, CuCl<sub>2</sub> (0.05 mmol), THF (2.0 mL), alkenes (0.5 mmol), TMEDA (0.75 mmol), TBN (2.0 mmol) and THF (2.0 mL) were added in turn. The tube was sealed with parafilm and stirred at 65 °C for 24 h. After confirming the finish of the reaction by TLC, the resultant was concentrated in vacuum and purified by column chromatography on silica gel (ethyl acetate/petroleum ether = 1/100 to 7/1, v/v) to afford the desired products.

### The procedure for the reductive cleavage of compound **3aa**

To a stirred solution of ethyl 3-(4-bromophenyl)-4,5-dihydroisoxazole-5-carboxylate (**3aa**) (89.4 mg, 0.3 mmol, 1 equiv.) and NH<sub>4</sub>Cl (161 mg, 3.0 mmol, 10 equiv.) in EtOH and Water (1:1, 15 mL) was added Fe powder (168 mg, 3.0 mmol, 10 equiv.). The mixture was stirred at 80 °C until the complete consumption of **3aa**. The reaction mixture was then cooled to room temperature, diluted with ethyl acetate, and filtered through a silica pad. The filtrate was washed with brine, and the organic layer was

separated, dried over Na<sub>2</sub>SO<sub>4</sub>, and evaporated in vacuo. The crude product was purified by column chromatography on silica gel with ethyl acetate/ petroleum ether to afford the product **13** as a yellow solid, 53.5 mg, 59% yield.

**The procedure for the hydrolysis of compound 3aa**

To a solution of LiOH (5 equiv) in water:THF (1:5, 3 mL) at room temperature was slowly added the ethyl 3-(4-bromophenyl)-4,5-dihydroisoxazole-5-carboxylate (**3aa**) (59.6 mg, 0.2 mmol, 1 equiv). The mixture was stirred at room temperature for overnight. Solvent was removed under reduced pressure. The residue was dissolved in water and acidified with 2M HCl to pH 1 followed by extraction with DCM. The crude product was purified by column chromatography on silica gel with ethyl acetate to afford the product **14** as a white solid, 48.7 mg, 90% yield.

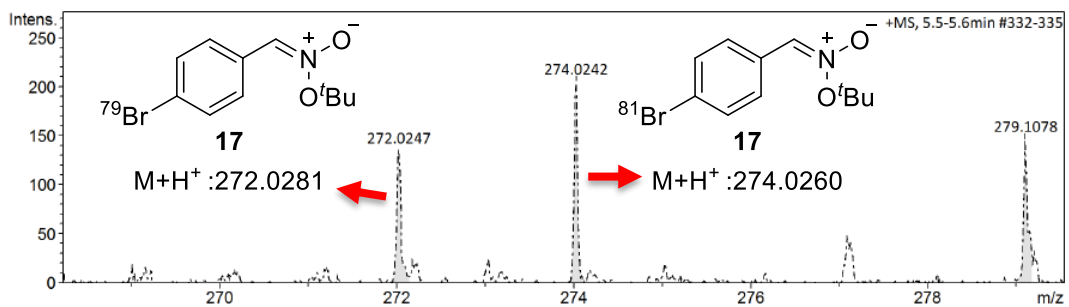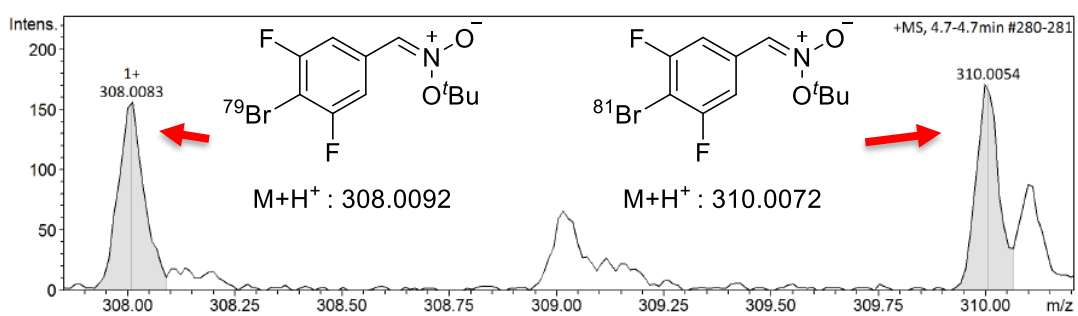

**Fig. S1** Nitronate detected by LC-HRMS

## DFT calculations

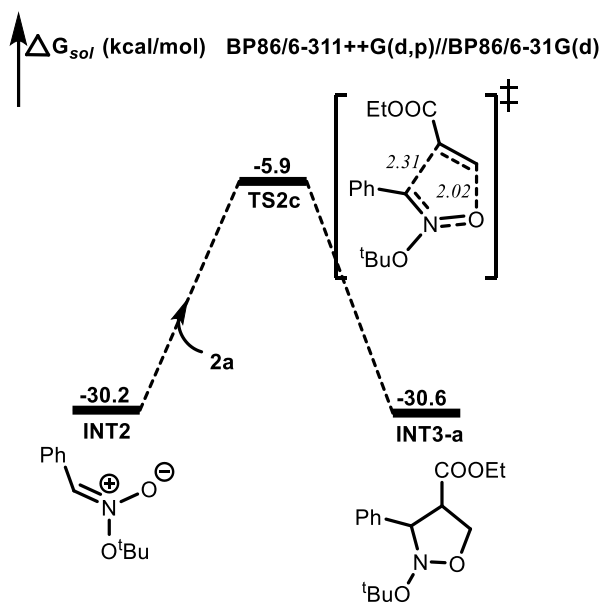

**Figure S2.** Energy profile (in kcal/mol) for the unfavorable cycloaddition of nitronate and **2a**. Bond lengths are shown in Å.

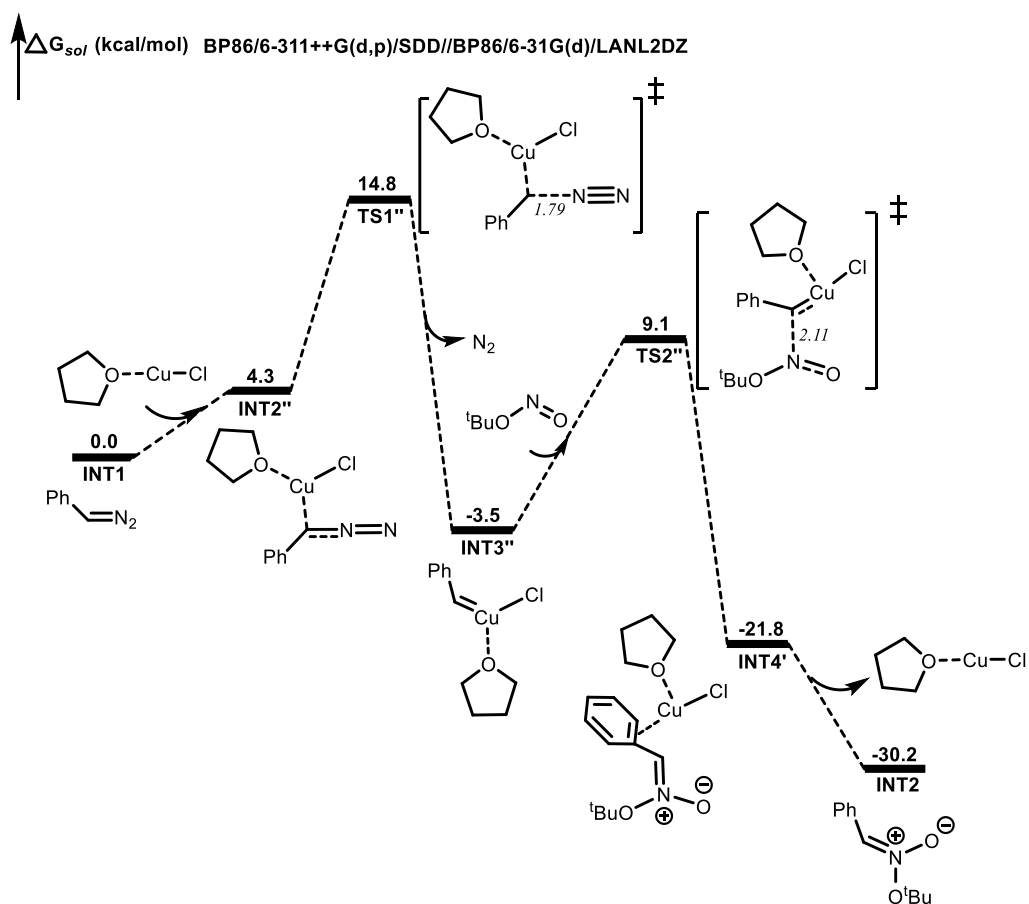

**Figure S3.** Energy profile (in kcal/mol) for the formation of nitronate with CuCl catalyst. Bond lengths are shown in Å.

## X-Ray diffraction analysis of compound **3ab**

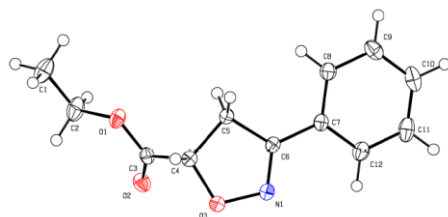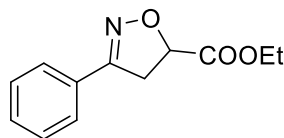

Structure of **3ab** (CCDC 2083541)

**Table S1:** Crystal data and structure refinement for **3ab** (Molecular structure of **3ab** with ellipsoids at the 50% probability level.)

|                                             |                                                               |
|---------------------------------------------|---------------------------------------------------------------|
| Empirical formula                           | C <sub>12</sub> H <sub>13</sub> NO <sub>3</sub>               |
| Formula weight                              | 219.23                                                        |
| Temperature/K                               | 120.03                                                        |
| Crystal system                              | triclinic                                                     |
| Space group                                 | P-1                                                           |
| a/Å                                         | 7.4807(3)                                                     |
| b/Å                                         | 8.6220(4)                                                     |
| c/Å                                         | 9.8229(4)                                                     |
| α/°                                         | 68.5450(10)                                                   |
| β/°                                         | 71.4920(10)                                                   |
| γ/°                                         | 84.1620(10)                                                   |
| Volume/Å <sup>3</sup>                       | 559.09(4)                                                     |
| Z                                           | 2                                                             |
| ρ <sub>calc</sub> /cm <sup>3</sup>          | 1.302                                                         |
| μ/mm <sup>-1</sup>                          | 0.094                                                         |
| F(000)                                      | 232.0                                                         |
| Crystal size/mm <sup>3</sup>                | 0.4 × 0.3 × 0.2                                               |
| Radiation                                   | MoKα (λ = 0.71073)                                            |
| 2θ range for data collection/°              | 4.674 to 55.096                                               |
| Index ranges                                | -9 ≤ h ≤ 9, -11 ≤ k ≤ 11, -12 ≤ l ≤ 12                        |
| Reflections collected                       | 9291                                                          |
| Independent reflections                     | 2472 [R <sub>int</sub> = 0.0621, R <sub>sigma</sub> = 0.0494] |
| Data/restraints/parameters                  | 2472/0/150                                                    |
| Goodness-of-fit on F <sup>2</sup>           | 1.048                                                         |
| Final R indexes [I ≥ 2σ (I)]                | R <sub>1</sub> = 0.0473, wR <sub>2</sub> = 0.1272             |
| Final R indexes [all data]                  | R <sub>1</sub> = 0.0505, wR <sub>2</sub> = 0.1314             |
| Largest diff. peak/hole / e Å <sup>-3</sup> | 0.49/-0.23                                                    |

**Table S2:** Bond lengths [ $\text{\AA}$ ] and angles [ $^\circ$ ] for **3ab**

|            |            |             |            |
|------------|------------|-------------|------------|
| O1-C3      | 1.3290(14) | C12-C11     | 1.3857(18) |
| O1-C2      | 1.4580(14) | C6-C5       | 1.5071(15) |
| O3-N1      | 1.4138(13) | C8-C9       | 1.3910(17) |
| O3-C4      | 1.4441(13) | C3-C4       | 1.5226(15) |
| O2-C3      | 1.2032(15) | C5-C4       | 1.5342(16) |
| N1-C6      | 1.2809(15) | C10-C9      | 1.387(2)   |
| C7-C12     | 1.4025(16) | C10-C11     | 1.392(2)   |
| C7-C6      | 1.4681(15) | C2-C1       | 1.4942(19) |
| C7-C8      | 1.3978(16) |             |            |
| C3-O1-C2   | 116.37(9)  | O1-C3-C4    | 108.49(9)  |
| N1-O3-C4   | 109.61(8)  | O2-C3-O1    | 126.01(11) |
| C6-N1-O3   | 109.79(9)  | O2-C3-C4    | 125.50(11) |
| C12-C7-C6  | 121.03(11) | C6-C5-C4    | 100.44(9)  |
| C8-C7-C12  | 118.99(11) | O3-C4-C3    | 109.59(9)  |
| C8-C7-C6   | 119.98(10) | O3-C4-C5    | 105.92(9)  |
| C11-C12-C7 | 120.15(12) | C3-C4-C5    | 112.73(9)  |
| N1-C6-C7   | 120.87(10) | C9-C10-C11  | 119.72(12) |
| N1-C6-C5   | 114.21(10) | C10-C9-C8   | 120.19(12) |
| C7-C6-C5   | 124.92(10) | C12-C11-C10 | 120.50(12) |
| C9-C8-C7   | 120.44(11) | O1-C2-C1    | 107.79(11) |

## Compound characterisations

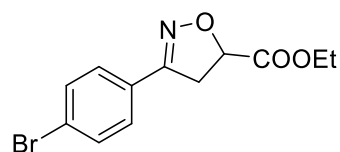

**3aa**

### Ethyl 3-(4-bromophenyl)-4,5-dihydroisoxazole-5-carboxylate (3aa)

ethyl acetate/ petroleum ether =1:6; light yellow solid; 88% yield (131.6 mg); 20.0 mmol scale: 85% yield (5.1 g); mp: 66-68 °C; <sup>1</sup>H NMR (400 MHz, CDCl<sub>3</sub>) δ 7.51 (s, 4H), 5.15 (dd, *J* = 10.5, 7.9 Hz, 1H), 4.24 (q, *J* = 7.1 Hz, 2H), 3.592 (d, *J* = 7.9 Hz, 1H), 3.586 (d, *J* = 10.5 Hz, 1H), 1.30 (t, *J* = 7.1 Hz, 3H); <sup>13</sup>C NMR (100 MHz, CDCl<sub>3</sub>) δ 169.9, 155.1, 131.9, 128.2, 127.4, 124.7, 78.2, 62.0, 38.5, 14.0; HRMS (ESI-TOF): Anal. Calcd. For C<sub>12</sub>H<sub>12</sub><sup>79</sup>BrNNaO<sub>3</sub><sup>+</sup>: 319.9893, C<sub>12</sub>H<sub>12</sub><sup>81</sup>BrNNaO<sub>3</sub><sup>+</sup>: 321.9872, Found: 319.9881, 321.9890; IR (neat, cm<sup>-1</sup>): ν 2972, 2933, 1738, 1195, 1160, 1008, 890, 821.

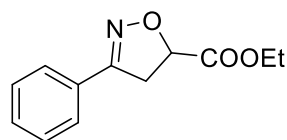

**3ab**

### Ethyl 3-phenyl-4,5-dihydroisoxazole-5-carboxylate (3ab)

ethyl acetate/ petroleum ether =1:6; white solid; 92% yield (100.9 mg); 10.0 mmol scale: 92% yield (2.0 g); mp: 35-36 °C; <sup>1</sup>H NMR (400 MHz, CDCl<sub>3</sub>) δ 7.69 – 7.63 (m, 2H), 7.43 – 7.35 (m, 3H), 5.14 (dd, *J* = 10.4, 7.9 Hz, 1H), 4.24 (q, *J* = 7.1 Hz, 2H), 3.623 (d, *J* = 7.9 Hz, 1H), 3.617 (d, *J* = 10.4 Hz, 1H), 1.30 (t, *J* = 7.1 Hz, 3H); <sup>13</sup>C NMR (100 MHz, CDCl<sub>3</sub>) δ 170.0, 155.9, 130.3, 128.6, 128.4, 126.8, 78.0, 61.8, 38.7, 14.0; Anal. Calcd. For C<sub>12</sub>H<sub>13</sub>NNaO<sub>3</sub><sup>+</sup>: 242.0788, Found: 242.0778; IR (neat, cm<sup>-1</sup>): ν 2976, 2936, 2906, 1750, 1209, 1182, 1035, 901, 762, 695.

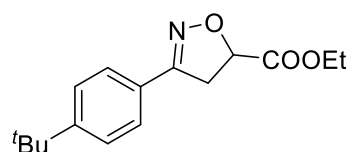

**3ac**

### Ethyl 3-(4-(tert-butyl)phenyl)-4,5-dihydroisoxazole-5-carboxylate (3ac)

ethyl acetate/ petroleum ether =1:8; colorless liquid; 90% yield (123.9 mg); <sup>1</sup>H NMR (400 MHz, CDCl<sub>3</sub>) δ 7.60 (d, *J* = 8.2 Hz, 2H), 7.41 (d, *J* = 8.2 Hz, 2H), 5.12 (dd, *J* = 10.2, 8.0 Hz, 1H), 4.23 (q, *J* = 7.1 Hz, 2H), 3.64 – 3.59 (m, 2H), 1.31 (s, 9H), 1.29 (t, *J* = 7.1 Hz, 3H); <sup>13</sup>C NMR (100 MHz, CDCl<sub>3</sub>) δ 170.1, 155.7, 153.7, 126.6, 125.6, 125.5, 77.8, 61.7, 38.8, 34.7, 31.0, 13.9; HRMS (ESI-TOF): Anal. Calcd. For C<sub>16</sub>H<sub>21</sub>NNaO<sub>3</sub><sup>+</sup>: 298.1414, Found: 298.1427; IR (neat, cm<sup>-1</sup>): ν 2983, 2938, 1735, 1513, 1203, 1158, 893, 836.



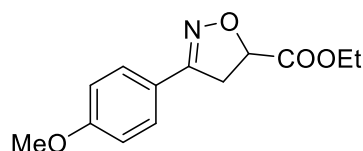

**3ad**

**Ethyl 3-(4-methoxyphenyl)-4,5-dihydroisoxazole-5-carboxylate (3ad)**

ethyl acetate/ petroleum ether =1:5; light yellow liquid; 85% yield (106.0 mg);  $^1\text{H NMR}$  (400 MHz,  $\text{CDCl}_3$ )  $\delta$  7.59 (d,  $J = 8.9$  Hz, 2H), 6.89 (d,  $J = 8.9$  Hz, 2H), 5.11 (dd,  $J = 10.3, 8.0$  Hz, 1H), 4.24 (q,  $J = 7.1$  Hz, 2H), 3.81 (s, 3H), 3.593 (d,  $J = 8.0$  Hz, 1H), 3.587 (d,  $J = 10.3$  Hz, 1H), 1.30 (t,  $J = 7.1$  Hz, 3H);  $^{13}\text{C NMR}$  (100 MHz,  $\text{CDCl}_3$ )  $\delta$  170.3, 161.2, 155.4, 128.4, 121.0, 114.1, 77.8, 61.8, 55.3, 39.0, 14.0; HRMS (ESI-TOF): Anal. Calcd. For  $\text{C}_{13}\text{H}_{15}\text{NNaO}_4^+$ : 272.0893, Found: 272.0890; IR (neat,  $\text{cm}^{-1}$ ):  $\nu$  2980, 2938, 2840, 1735, 1608, 1516, 1252, 1202, 1177, 1019, 888, 832.

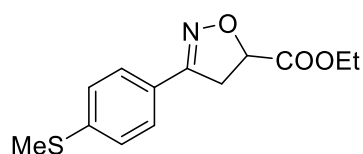

**3ae**

**Ethyl 3-(4-(methylthio)phenyl)-4,5-dihydroisoxazole-5-carboxylate (3ae)**

ethyl acetate/ petroleum ether =1:5; white solid; 83% yield (110.1 mg); mp: 63-65 °C;  $^1\text{H NMR}$  (400 MHz,  $\text{CDCl}_3$ )  $\delta$  7.54 (d,  $J = 8.6$  Hz, 2H), 7.20 (d,  $J = 8.6$  Hz, 2H), 5.12 (dd,  $J = 10.3, 8.1$  Hz, 1H), 4.23 (q,  $J = 7.1$  Hz, 2H), 3.67 – 3.48 (m, 2H), 2.46 (s, 3H), 1.29 (t,  $J = 7.1$  Hz, 3H);  $^{13}\text{C NMR}$  (100 MHz,  $\text{CDCl}_3$ )  $\delta$  170.0, 155.4, 141.9, 127.0, 125.6, 124.7, 77.9, 61.8, 38.6, 14.9, 14.0; HRMS (ESI-TOF): Anal. Calcd. For  $\text{C}_{13}\text{H}_{15}\text{NNaO}_3\text{S}^+$ : 288.0665, Found: 288.0675; IR (neat,  $\text{cm}^{-1}$ ):  $\nu$  2989, 2921, 1748, 1199, 1032, 1022, 894, 817.

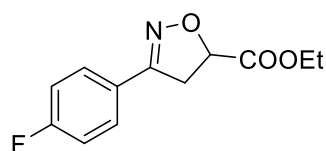

**3af**

**Ethyl 3-(4-fluorophenyl)-4,5-dihydroisoxazole-5-carboxylate (3af)**

ethyl acetate/ petroleum ether =1:6; white solid; 86% yield (101.9 mg); mp: 45-47 °C;  $^1\text{H NMR}$  (400 MHz,  $\text{CDCl}_3$ )  $\delta$  7.72 – 7.60 (m, 2H), 7.12 – 7.03 (m, 2H), 5.14 (dd,  $J = 10.4, 8.0$  Hz, 1H), 4.24 (q,  $J = 7.1$  Hz, 2H), 3.69 – 3.47 (m, 2H), 1.30 (t,  $J = 7.1$  Hz, 3H);  $^{13}\text{C NMR}$  (100 MHz,  $\text{CDCl}_3$ )  $\delta$  170.0, 163.8 (d,  $J = 251.3$  Hz), 154.9, 128.8 (d,  $J = 8.6$  Hz), 124.8 (d,  $J = 3.4$  Hz), 115.8 (d,  $J = 22.0$  Hz), 78.1, 61.9, 38.7, 14.0;  $^{19}\text{F NMR}$  (376 MHz,  $\text{CDCl}_3$ )  $\delta$  -109.3; HRMS (ESI-TOF): Anal. Calcd. For  $\text{C}_{12}\text{H}_{12}\text{FNNaO}_3^+$ : 260.0693, Found: 260.0683; IR (neat,  $\text{cm}^{-1}$ ):  $\nu$  2983, 2938, 1735, 1603, 1513, 1203, 1158, 894, 836.

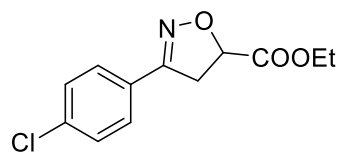

**3ag**

**Ethyl 3-(4-chlorophenyl)-4,5-dihydroisoxazole-5-carboxylate (3ag)**

ethyl acetate/ petroleum ether =1:6; white solid; 84% yield (106.3 mg); mp: 57-58 °C; <sup>1</sup>H NMR (400 MHz, CDCl<sub>3</sub>) δ 7.58 (d, *J* = 8.6 Hz, 2H), 7.35 (d, *J* = 8.6 Hz, 2H), 5.15 (dd, *J* = 10.5, 7.9 Hz, 1H), 4.24 (q, *J* = 7.1 Hz, 2H), 3.60 (d, *J* = 7.9 Hz, 1H), 3.59 (d, *J* = 10.5 Hz, 1H), 1.30 (t, *J* = 7.1 Hz, 3H); <sup>13</sup>C NMR (100 MHz, CDCl<sub>3</sub>) δ 169.9, 155.0, 136.3, 128.9, 128.0, 127.0, 78.2, 62.0, 38.5, 14.0; HRMS (ESI-TOF): Anal. Calcd. For C<sub>12</sub>H<sub>12</sub><sup>35</sup>ClNNaO<sub>3</sub><sup>+</sup>: 276.0398, Found: 276.0393; IR (neat, cm<sup>-1</sup>): ν 2987, 2963, 2906, 1749, 1340, 1215, 1203, 1032, 908, 839, 827.

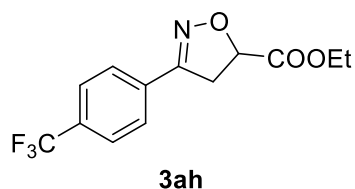**Ethyl 3-(4-(trifluoromethyl)phenyl)-4,5-dihydroisoxazole-5-carboxylate (3ah)**

ethyl acetate/ petroleum ether =1:6; white solid; 60% yield (86.1 mg); mp: 90-91 °C; <sup>1</sup>H NMR (400 MHz, CDCl<sub>3</sub>) δ 7.78 (d, *J* = 8.2 Hz, 2H), 7.66 (d, *J* = 8.2 Hz, 2H), 5.21 (dd, *J* = 11.0, 7.5 Hz, 1H), 4.27 (q, *J* = 7.2 Hz, 2H), 3.65 (d, *J* = 7.5 Hz, 1H), 3.64 (d, *J* = 11.0 Hz, 1H), 1.32 (t, *J* = 7.2 Hz, 3H); <sup>13</sup>C NMR (100 MHz, CDCl<sub>3</sub>) δ 169.8, 155.0, 132.1 (q, *J* = 32.7 Hz), 132.0, 127.1, 125.7 (q, *J* = 3.7 Hz), 123.7 (q, *J* = 272.2 Hz), 78.5, 62.1, 38.4, 14.0; <sup>19</sup>F NMR (376 MHz, CDCl<sub>3</sub>) δ -63.0; HRMS (ESI-TOF): Anal. Calcd. For C<sub>13</sub>H<sub>12</sub>F<sub>3</sub>NNaO<sub>3</sub><sup>+</sup>: 310.0661, Found: 310.0674; IR (neat, cm<sup>-1</sup>): ν 2977, 2939, 1739, 1321, 1161, 1120, 1066, 886, 840.

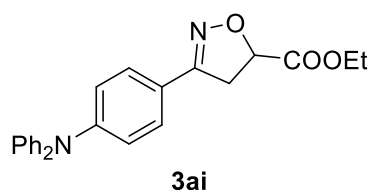**Ethyl 3-(4-(diphenylamino)phenyl)-4,5-dihydroisoxazole-5-carboxylate (3ai)**

ethyl acetate/ petroleum ether =1:6; yellow liquid; 85% yield (164.3 mg); <sup>1</sup>H NMR (400 MHz, CDCl<sub>3</sub>) δ 7.50 (d, *J* = 8.7 Hz, 2H), 7.31 – 7.23 (m, 4H), 7.15 – 6.99 (m, 8H), 5.12 (dd, *J* = 10.5, 7.5 Hz, 1H), 4.26 (q, *J* = 7.1 Hz, 2H), 3.59 (d, *J* = 7.5 Hz, 1H), 3.58 (d, *J* = 10.5 Hz, 1H), 1.32 (t, *J* = 7.1 Hz, 3H); <sup>13</sup>C NMR (100 MHz, CDCl<sub>3</sub>) δ 170.3, 155.5, 149.8, 146.9, 129.4, 127.9, 125.2, 123.9, 121.7, 121.3, 77.8, 61.8, 39.0, 14.1; HRMS (ESI-TOF): Anal. Calcd. For C<sub>24</sub>H<sub>23</sub>N<sub>2</sub>O<sub>3</sub><sup>+</sup>: 387.1703, Found: 387.1706; IR (neat, cm<sup>-1</sup>): ν 2952, 2939, 1736, 1589, 1487, 1272, 1028, 754, 696.

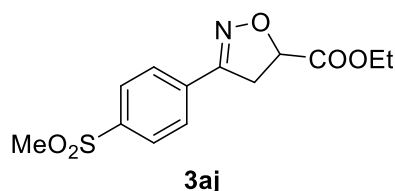**Ethyl 3-(4-(methylsulfonyl)phenyl)-4,5-dihydroisoxazole-5-carboxylate (3aj)**

ethyl acetate/ petroleum ether =2:1; white solid; 59% yield (88.0 mg); mp: 98-100 °C; <sup>1</sup>H NMR (400 MHz, CDCl<sub>3</sub>) δ 7.91 (d, *J* = 8.5 Hz, 2H), 7.81 (d, *J* = 8.5 Hz, 2H), 5.19 (t, *J* = 9.3 Hz, 1H), 4.23 (q, *J* = 7.1 Hz, 2H), 3.63 (d, *J* = 9.3 Hz, 2H), 3.03 (s, 3H), 1.28 (t, *J* = 7.1 Hz, 3H); <sup>13</sup>C NMR (100 MHz, CDCl<sub>3</sub>)

$\delta$  169.5, 154.7, 141.6, 133.6, 127.7, 127.5, 78.6, 62.0, 44.2, 38.1, 13.9; HRMS (ESI-TOF): Anal. Calcd. For  $C_{13}H_{15}NNaO_5S^+$ : 320.0563, Found: 320.0565; IR (neat,  $cm^{-1}$ ):  $\nu$  3026, 3007, 2927, 1731, 1308, 1225, 1150, 892, 846, 777.

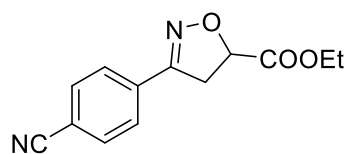

**3ak**

**Ethyl 3-(4-cyanophenyl)-4,5-dihydroisoxazole-5-carboxylate (3ak)**

ethyl acetate/ petroleum ether =1:4; white solid; 54% yield (66.2 mg); mp: 98-99 °C;  $^1H$  NMR (400 MHz,  $CDCl_3$ )  $\delta$  7.77 (d,  $J$  = 8.1 Hz, 2H), 7.69 (d,  $J$  = 8.1 Hz, 2H), 5.21 (dd,  $J$  = 11.0, 7.6 Hz, 1H), 4.26 (q,  $J$  = 7.2 Hz, 2H), 3.71 – 3.57 (m, 2H), 1.31 (t,  $J$  = 7.2 Hz, 3H);  $^{13}C$  NMR (100 MHz,  $CDCl_3$ )  $\delta$  169.5, 154.7, 132.8, 132.5, 127.3, 118.1, 113.7, 78.7, 62.2, 38.0, 14.0; HRMS (ESI-TOF): Anal. Calcd. For  $C_{13}H_{12}N_2NaO_5^+$ : 267.0740, Found: 267.0751; IR (neat,  $cm^{-1}$ ):  $\nu$  2985, 2936, 2226, 1721, 1284, 1018, 889, 868, 849, 832.

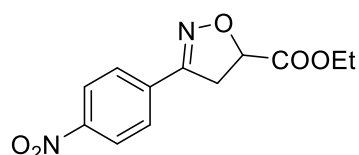

**3al**

**Ethyl 3-(4-nitrophenyl)-4,5-dihydroisoxazole-5-carboxylate (3al)**

ethyl acetate/ petroleum ether =1:4; yellow solid; 41% yield (54.0 mg); mp: 80-81 °C;  $^1H$  NMR (400 MHz,  $CDCl_3$ )  $\delta$  8.25 (d,  $J$  = 8.8 Hz, 2H), 7.84 (d,  $J$  = 8.8 Hz, 2H), 5.24 (dd,  $J$  = 11.0, 7.6 Hz, 1H), 4.27 (q,  $J$  = 7.1 Hz, 2H), 3.68 (d,  $J$  = 7.6 Hz, 1H), 3.66 (d,  $J$  = 11.0 Hz, 1H), 1.32 (t,  $J$  = 7.1 Hz, 3H);  $^{13}C$  NMR (100 MHz,  $CDCl_3$ )  $\delta$  169.5, 154.5, 148.6, 134.5, 127.6, 124.0, 78.9, 62.2, 38.1, 14.0; HRMS (ESI-TOF): Anal. Calcd. For  $C_{12}H_{12}N_2NaO_5^+$ : 287.0638, Found: 287.0649; IR (neat,  $cm^{-1}$ ):  $\nu$  3115, 2988, 2965, 1728, 1513, 1342, 1256, 910, 848.

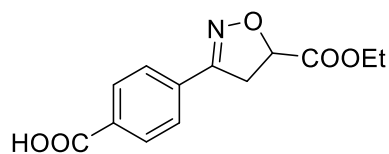

**3am**

**4-(5-(Ethoxycarbonyl)-4,5-dihydroisoxazol-3-yl)benzoic acid (3am)**

ethyl acetate/ petroleum ether =1:1; white solid; 72% yield (95.2 mg); mp: 94-96 °C;  $^1H$  NMR (400 MHz, DMSO- $d_6$ )  $\delta$  8.00 (d,  $J$  = 8.1 Hz, 2H), 7.81 (d,  $J$  = 8.1 Hz, 2H), 5.31 (dd,  $J$  = 11.8, 6.8 Hz, 1H), 4.17 (q,  $J$  = 7.1 Hz, 2H), 3.81 (dd,  $J$  = 17.4, 11.8 Hz, 1H), 3.66 (dd,  $J$  = 17.4, 6.8 Hz, 1H), 1.23 (t,  $J$  = 7.1 Hz, 3H);  $^{13}C$  NMR (100 MHz, DMSO- $d_6$ )  $\delta$  169.9, 166.8, 156.0, 132.4, 132.3, 129.8, 127.1, 78.1, 61.4, 38.3, 14.0; HRMS (ESI-TOF): Anal. Calcd. For  $C_{13}H_{13}NNaO_5^+$ : 286.0686, Found: 286.0673; IR (neat,  $cm^{-1}$ ):  $\nu$  3071, 2980, 2921, 2673, 2553, 1754, 1681, 1288, 1197, 1025, 862, 771.

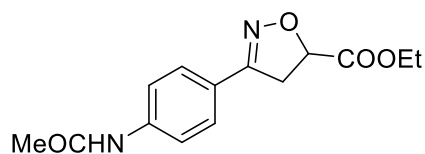

**3an**

**Ethyl 3-(4-acetamidophenyl)-4,5-dihydroisoxazole-5-carboxylate (3an)**

ethyl acetate/ petroleum ether =3:1; white solid; 53% yield (73.6 mg); mp: 135-136 °C; <sup>1</sup>H NMR (400 MHz, DMSO-d<sub>6</sub>) δ 10.15 (s, 1H), 7.68 (d, *J* = 8.6 Hz, 2H), 7.62 (d, *J* = 8.6 Hz, 2H), 5.22 (dd, *J* = 11.6, 6.6 Hz, 1H), 4.16 (q, *J* = 7.1 Hz, 2H), 3.72 (dd, *J* = 17.2, 11.6 Hz, 1H), 3.58 (dd, *J* = 17.2, 6.6 Hz, 1H), 2.07 (s, 3H), 1.22 (t, *J* = 7.1 Hz, 3H); <sup>13</sup>C NMR (100 MHz, DMSO-d<sub>6</sub>) δ 170.2, 168.8, 155.8, 141.3, 127.7, 122.9, 118.9, 77.5, 61.3, 38.7, 24.2, 14.0; HRMS (ESI-TOF): Anal. Calcd. For C<sub>14</sub>H<sub>16</sub>N<sub>2</sub>NaO<sub>4</sub><sup>+</sup>: 299.1002, Found: 299.1001; IR (neat, cm<sup>-1</sup>): ν 3305, 3039, 2994, 2947, 1749, 1668, 1522, 1201, 1022, 896, 829.

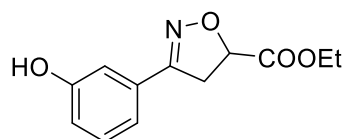

**3ao**

**Ethyl 3-(3-hydroxyphenyl)-4,5-dihydroisoxazole-5-carboxylate (3ao)**

ethyl acetate/ petroleum ether =1:4; white solid; 75% yield (87.9 mg); mp: 79-80 °C; <sup>1</sup>H NMR (400 MHz, CDCl<sub>3</sub>) δ 7.27 – 7.19 (m, 3H), 7.09 (d, *J* = 8.0 Hz, 1H), 6.94 (dd, *J* = 8.0, 2.5 Hz, 1H), 5.15 (dd, *J* = 10.0, 8.4 Hz, 1H), 4.25 (q, *J* = 7.1 Hz, 2H), 3.65 – 3.57 (m, 2H), 1.29 (t, *J* = 7.1 Hz, 3H); <sup>13</sup>C NMR (100 MHz, CDCl<sub>3</sub>) δ 170.5, 156.4, 156.3, 130.0, 129.2, 119.1, 118.2, 113.5, 77.9, 62.2, 39.0, 14.0; HRMS (ESI-TOF): Anal. Calcd. For C<sub>12</sub>H<sub>13</sub>NNaO<sub>4</sub><sup>+</sup>: 258.0737, Found: 258.0724; IR (neat, cm<sup>-1</sup>): ν 3451, 2987, 2960, 1737, 1450, 1191, 1160, 1024, 837, 789, 685.

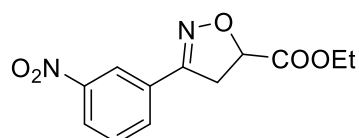

**3ap**

**Ethyl 3-(3-nitrophenyl)-4,5-dihydroisoxazole-5-carboxylate (3ap)**

ethyl acetate/ petroleum ether =1:4; white solid; 49% yield (64.3 mg); mp: 50-51 °C; <sup>1</sup>H NMR (400 MHz, CDCl<sub>3</sub>) δ 8.43 – 8.41 (m, 1H), 8.28 – 8.24 (m, 1H), 8.08 – 8.04 (m, 1H), 7.63 – 7.58 (m, 1H), 5.24 (dd, *J* = 10.8, 7.7 Hz, 1H), 4.27 (q, *J* = 7.1 Hz, 2H), 3.69 (d, *J* = 7.7 Hz, 1H), 3.68 (d, *J* = 10.8 Hz, 1H), 1.32 (t, *J* = 7.1 Hz, 3H); <sup>13</sup>C NMR (100 MHz, CDCl<sub>3</sub>) δ 169.5, 154.4, 148.3, 132.4, 130.4, 129.9, 124.9, 121.6, 78.7, 62.2, 38.2, 14.0; HRMS (ESI-TOF): Anal. Calcd. For C<sub>12</sub>H<sub>12</sub>N<sub>2</sub>NaO<sub>5</sub><sup>+</sup>: 287.0638, Found: 287.0627; IR (neat, cm<sup>-1</sup>): ν 3089, 2974, 2924, 1745, 1528, 1352, 1337, 1205, 891, 739, 679.

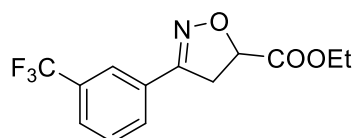

**3aq**

**Ethyl 3-(3-(trifluoromethyl)phenyl)-4,5-dihydroisoxazole-5-carboxylate (3aq)**

ethyl acetate/ petroleum ether =1:6; white solid; 73% yield (104.9 mg); mp: 34-35 °C; <sup>1</sup>H NMR (400 MHz, CDCl<sub>3</sub>) δ 7.89 (s, 1H), 7.86 (d, *J* = 7.8 Hz, 1H), 7.66 (d, *J* = 7.8 Hz, 1H), 7.53 (t, *J* = 7.8 Hz, 1H), 5.20 (dd, *J* = 10.5, 7.9 Hz, 1H), 4.26 (q, *J* = 7.1 Hz, 2H), 3.65 (d, *J* = 7.9 Hz, 1H), 3.65 (d, *J* = 10.5 Hz, 1H), 1.31 (t, *J* = 7.1 Hz, 3H); <sup>13</sup>C NMR (100 MHz, CDCl<sub>3</sub>) δ 169.7, 154.9, 131.2 (q, *J* = 32.7 Hz), 129.9, 129.4, 129.3, 126.9 (q, *J* = 3.7 Hz), 123.6 (q, *J* = 272.3 Hz), 123.6 (q, *J* = 3.8 Hz), 78.4, 62.1, 38.4, 14.0; <sup>19</sup>F NMR (376 MHz, CDCl<sub>3</sub>) δ -62.9; HRMS (ESI-TOF): Anal. Calcd. For C<sub>13</sub>H<sub>12</sub>F<sub>3</sub>NNaO<sub>3</sub><sup>+</sup>: 310.0661, Found: 310.0648; IR (neat, cm<sup>-1</sup>): ν 2979, 2938, 2907, 1738, 1311, 1165, 1122, 1098, 900, 803, 693.

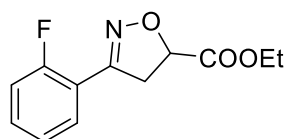

**3ar**

**Ethyl 3-(2-fluorophenyl)-4,5-dihydroisoxazole-5-carboxylate (3ar)**

ethyl acetate/ petroleum ether =1:8; colorless liquid; 71% yield (84.3 mg); <sup>1</sup>H NMR (400 MHz, CDCl<sub>3</sub>) δ 7.87 – 7.82 (m, 1H), 7.43 – 7.35 (m, 1H), 7.18 – 7.13 (m, 1H), 7.12 – 7.06 (m, 1H), 5.14 (dd, *J* = 10.0, 8.6 Hz, 1H), 4.25 (q, *J* = 7.1 Hz, 2H), 3.72 – 3.68 (m, 2H), 1.30 (t, *J* = 7.2 Hz, 3H); <sup>13</sup>C NMR (100 MHz, CDCl<sub>3</sub>) δ 170.0, 160.3 (d, *J* = 252.7 Hz), 152.7 (d, *J* = 3.0 Hz), 132.1 (d, *J* = 8.6 Hz), 129.1 (d, *J* = 3.0 Hz), 124.4 (d, *J* = 3.4 Hz), 116.6 (d, *J* = 11.5 Hz), 116.3 (d, *J* = 22.0 Hz), 78.1 (d, *J* = 2.3 Hz), 61.8, 40.4 (d, *J* = 7.7 Hz), 14.0; <sup>19</sup>F NMR (376 MHz, CDCl<sub>3</sub>) δ -112.5; HRMS (ESI-TOF): Anal. Calcd. For C<sub>12</sub>H<sub>12</sub>FNNaO<sub>3</sub><sup>+</sup>: 260.0693, Found: 260.0684; IR (neat, cm<sup>-1</sup>): ν 2983, 2929, 2854, 1736, 1454, 1203, 1027, 898, 758.

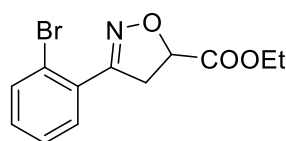

**3as**

**Ethyl 3-(2-bromophenyl)-4,5-dihydroisoxazole-5-carboxylate (3as)**

ethyl acetate/ petroleum ether =1:6; colorless liquid; 83% yield (124.1 mg); <sup>1</sup>H NMR (400 MHz, CDCl<sub>3</sub>) δ 7.62 (dd, *J* = 7.6, 1.3 Hz, 1H), 7.53 (dd, *J* = 7.6, 1.8 Hz, 1H), 7.38 – 7.33 (m, 1H), 7.31 – 7.26 (m, 1H), 5.20 (dd, *J* = 11.0, 7.0 Hz, 1H), 4.28 (q, *J* = 7.1 Hz, 2H), 3.83 (dd, *J* = 17.3, 11.0 Hz, 1H), 3.76 (dd, *J* = 17.3, 7.0 Hz, 1H), 1.33 (t, *J* = 7.1 Hz, 3H); <sup>13</sup>C NMR (100 MHz, CDCl<sub>3</sub>) δ 169.9, 156.9, 133.6, 131.2, 130.9, 130.1, 127.5, 121.7, 78.4, 61.8, 41.2, 14.0; HRMS (ESI-TOF): Anal. Calcd. For C<sub>12</sub>H<sub>12</sub><sup>79</sup>BrNNaO<sub>3</sub><sup>+</sup>: 319.9893, C<sub>12</sub>H<sub>12</sub><sup>81</sup>BrNNaO<sub>3</sub><sup>+</sup>: 321.9872, Found: 319.9874, 321.9912; IR (neat, cm<sup>-1</sup>): ν 2982, 2938, 1736, 1341, 1200, 1026, 1016, 852, 756.

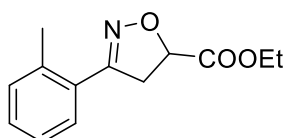

**3at**

**Ethyl 3-(o-tolyl)-4,5-dihydroisoxazole-5-carboxylate (3at)**

ethyl acetate/ petroleum ether =1:8; colorless liquid; 87% yield (101.5 mg);  $^1\text{H NMR}$  (400 MHz,  $\text{CDCl}_3$ )  $\delta$  7.35 – 7.20 (m, 4H), 5.10 (t,  $J = 9.0$  Hz, 1H), 4.26 (q,  $J = 7.1$  Hz, 2H), 3.67 (d,  $J = 9.0$  Hz, 2H), 2.55 (s, 3H), 1.31 (t,  $J = 7.1$  Hz, 3H);  $^{13}\text{C NMR}$  (100 MHz,  $\text{CDCl}_3$ )  $\delta$  170.2, 156.7, 138.1, 131.5, 129.6, 128.8, 127.6, 125.7, 77.0, 61.8, 41.3, 22.8, 14.0; HRMS (ESI-TOF): Anal. Calcd. For  $\text{C}_{13}\text{H}_{15}\text{NNaO}_3^+$ : 256.0944, Found: 256.0940; IR (neat,  $\text{cm}^{-1}$ ):  $\nu$  2981, 2928, 1735, 1336, 1200, 1030, 889, 852, 758.

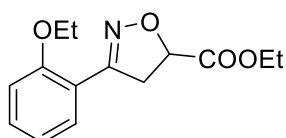

**3au**

**Ethyl 3-(2-ethoxyphenyl)-4,5-dihydroisoxazole-5-carboxylate (3au)**

ethyl acetate/ petroleum ether =1:6; white solid; 69% yield (91.2 mg); mp: 47-49 °C;  $^1\text{H NMR}$  (400 MHz,  $\text{CDCl}_3$ )  $\delta$  7.77 (dd,  $J = 7.8, 1.7$  Hz, 1H), 7.38 – 7.33 (m, 1H), 6.98 – 6.88 (m, 2H), 5.10 (dd,  $J = 11.0, 7.2$  Hz, 1H), 4.26 (q,  $J = 7.1$  Hz, 2H), 4.07 (q,  $J = 7.0$  Hz, 2H), 3.86 – 3.68 (m, 2H), 1.43 (t,  $J = 7.0$  Hz, 3H), 1.31 (t,  $J = 7.1$  Hz, 3H);  $^{13}\text{C NMR}$  (100 MHz,  $\text{CDCl}_3$ )  $\delta$  170.6, 156.8, 155.6, 131.5, 129.4, 120.6, 117.6, 112.0, 78.0, 63.9, 61.6, 41.5, 14.6, 14.0; HRMS (ESI-TOF): Anal. Calcd. For  $\text{C}_{14}\text{H}_{17}\text{NNaO}_4^+$ : 286.1050, Found: 286.1063; IR (neat,  $\text{cm}^{-1}$ ):  $\nu$  2983, 2950, 2939, 2890, 1730, 1453, 1282, 1255, 1030, 888, 760.

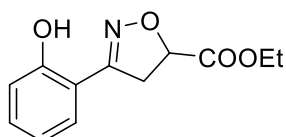

**3av**

**Ethyl 3-(2-hydroxyphenyl)-4,5-dihydroisoxazole-5-carboxylate (3av)**

ethyl acetate/ petroleum ether =1:6; red liquid; 51% yield (60.1 mg);  $^1\text{H NMR}$  (400 MHz,  $\text{CDCl}_3$ )  $\delta$  9.54 (s, 1H), 7.37 – 7.30 (m, 1H), 7.19 (d,  $J = 7.8$  Hz, 1H), 7.03 (d,  $J = 8.1$  Hz, 1H), 6.95 – 6.89 (m, 1H), 5.13 (dd,  $J = 10.8, 7.4$  Hz, 1H), 4.27 (q,  $J = 7.2$  Hz, 2H), 3.79 – 3.68 (m, 2H), 1.32 (t,  $J = 7.2$  Hz, 3H);  $^{13}\text{C NMR}$  (100 MHz,  $\text{CDCl}_3$ )  $\delta$  169.6, 157.8, 157.3, 132.1, 128.5, 119.6, 117.1, 113.0, 76.7, 62.2, 39.0, 14.0; HRMS (ESI-TOF): Anal. Calcd. For  $\text{C}_{12}\text{H}_{13}\text{NNaO}_4^+$ : 258.0737, Found: 258.0730; IR (neat,  $\text{cm}^{-1}$ ):  $\nu$  3211, 3057, 2984, 2939, 1737, 1494, 1258, 1201, 1157, 754, 655.

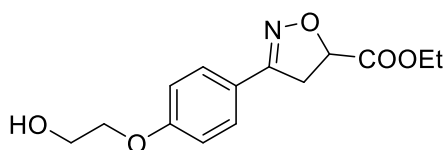

**3aw**

**Ethyl 3-(4-(2-hydroxyethoxy)phenyl)-4,5-dihydroisoxazole-5-carboxylate (3aw)**

ethyl acetate/ petroleum ether =1:1; white solid; 77% yield (107.1 mg);  $^1\text{H}$  NMR (400 MHz,  $\text{CDCl}_3$ )  $\delta$  7.55 (d,  $J$  = 8.8 Hz, 2H), 6.88 (d,  $J$  = 8.8 Hz, 2H), 5.09 (dd,  $J$  = 9.8, 8.5 Hz, 1H), 4.22 (q,  $J$  = 7.1 Hz, 2H), 4.09 – 4.04 (m, 2H), 3.94 (t,  $J$  = 4.5 Hz, 2H), 3.67 – 3.45 (m, 2H), 2.65 (s, 1H), 1.28 (t,  $J$  = 7.1 Hz, 3H);  $^{13}\text{C}$  NMR (100 MHz,  $\text{CDCl}_3$ )  $\delta$  170.2, 160.3, 155.4, 128.4, 121.2, 114.6, 77.7, 69.2, 61.8, 61.0, 38.9, 14.0; HRMS (ESI-TOF): Anal. Calcd. For  $\text{C}_{14}\text{H}_{17}\text{NNaO}_5^+$ : 302.0999, Found: 302.0989; IR (neat,  $\text{cm}^{-1}$ ):  $\nu$  3412, 2993, 2944, 1742, 1257, 1210, 1169, 1076, 1026, 890, 837, 818.

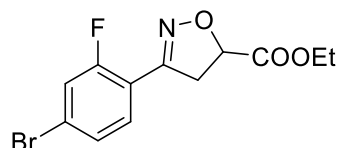

**3ax**

**Ethyl 3-(4-bromo-2-fluorophenyl)-4,5-dihydroisoxazole-5-carboxylate (3ax)**

ethyl acetate/ petroleum ether =1:10; white solid; 74% yield (117.0 mg); mp: 77-78 °C;  $^1\text{H}$  NMR (400 MHz,  $\text{CDCl}_3$ )  $\delta$  7.76 – 7.71 (m, 1H), 7.33 – 7.26 (m, 2H), 5.15 (t,  $J$  = 9.3 Hz, 1H), 4.25 (q,  $J$  = 7.1 Hz, 2H), 3.68 (d,  $J$  = 9.3 Hz, 1H), 3.67 (d,  $J$  = 9.3 Hz, 1H), 1.30 (t,  $J$  = 7.1 Hz, 3H);  $^{13}\text{C}$  NMR (100 MHz,  $\text{CDCl}_3$ )  $\delta$  169.8, 159.8 (d,  $J$  = 257.1 Hz), 152.0 (d,  $J$  = 3.3 Hz), 130.0 (d,  $J$  = 3.6 Hz), 128.0 (d,  $J$  = 3.4 Hz), 124.9 (d,  $J$  = 9.8 Hz), 120.0 (d,  $J$  = 25.4 Hz), 115.8 (d,  $J$  = 11.7 Hz), 78.3 (d,  $J$  = 2.5 Hz), 61.9, 40.1 (d,  $J$  = 7.7 Hz), 14.0;  $^{19}\text{F}$  NMR (376 MHz,  $\text{CDCl}_3$ )  $\delta$  -100.3; HRMS (ESI-TOF): Anal. Calcd. For  $\text{C}_{12}\text{H}_{11}^{79}\text{BrFNNaO}_5^+$ : 337.9799,  $\text{C}_{12}\text{H}_{11}^{81}\text{BrFNNaO}_5^+$ : 339.9778, Found: 337.9795, 339.9771; IR (neat,  $\text{cm}^{-1}$ ):  $\nu$  3072, 2985, 2929, 2855, 1726, 1594, 1203, 1170, 908, 878, 869, 823.

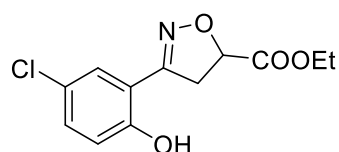

**3ay**

**Ethyl 3-(5-chloro-2-hydroxyphenyl)-4,5-dihydroisoxazole-5-carboxylate (3ay)**

ethyl acetate/ petroleum ether =1:8; pale pink solid; 62% yield (83.7 mg); mp: 83-84 °C;  $^1\text{H}$  NMR (400 MHz,  $\text{CDCl}_3$ )  $\delta$  9.55 (s, 1H), 7.28 (d,  $J$  = 8.9 Hz, 1H), 7.16 (s, 1H), 6.98 (d,  $J$  = 8.9 Hz, 1H), 5.16 (dd,  $J$  = 11.0, 7.2 Hz, 1H), 4.29 (q,  $J$  = 7.1 Hz, 2H), 3.81 – 3.61 (m, 2H), 1.34 (t,  $J$  = 7.1 Hz, 3H);  $^{13}\text{C}$  NMR (100 MHz,  $\text{CDCl}_3$ )  $\delta$  169.3, 156.9, 155.9, 131.9, 127.7, 124.3, 118.6, 114.3, 77.0, 62.4, 38.8, 14.1; HRMS (ESI-TOF): Anal. Calcd. For  $\text{C}_{12}\text{H}_{12}^{35}\text{ClNNaO}_4^+$ : 292.0347, Found: 292.0329; IR (neat,  $\text{cm}^{-1}$ ):  $\nu$  3072, 2996, 2967, 2930, 2911, 1751, 1384, 1204, 1193, 1170, 812, 667.

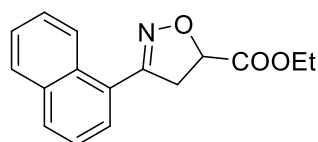

**3az**

**Ethyl 3-(naphthalen-1-yl)-4,5-dihydroisoxazole-5-carboxylate (3az)**

ethyl acetate/ petroleum ether =1:6; colorless liquid; 76% yield (102.4 mg);  $^1\text{H}$  NMR (400 MHz,  $\text{CDCl}_3$ )  $\delta$  8.99 (d,  $J$  = 8.6 Hz, 1H), 7.91 – 7.85 (m, 2H), 7.62 – 7.57 (m, 1H), 7.56 – 7.50 (m, 2H), 7.45 (dd,  $J$  = 8.1, 7.3 Hz, 1H), 5.17 (dd,  $J$  = 9.8, 8.2 Hz, 1H), 4.29 (q,  $J$  = 7.1 Hz, 2H), 3.85 – 3.78 (m, 2H), 1.33 (t,  $J$

= 7.1 Hz, 3H);  $^{13}\text{C}$  NMR (100 MHz,  $\text{CDCl}_3$ )  $\delta$  170.1, 156.4, 133.8, 131.1, 130.4, 128.4, 127.8, 127.5, 126.9, 126.3, 125.4, 124.6, 77.0, 61.9, 41.6, 14.0; HRMS (ESI-TOF): Anal. Calcd. For  $\text{C}_{16}\text{H}_{15}\text{NNaO}_3^+$ : 292.0944, Found: 292.0934; IR (neat,  $\text{cm}^{-1}$ ):  $\nu$  3050, 2982, 2938, 1735, 1318, 1202, 1024, 891, 801, 773.

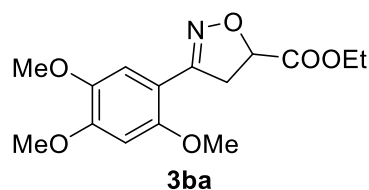

**Ethyl 3-(2,4,5-trimethoxyphenyl)-4,5-dihydroisoxazole-5-carboxylate (3ba)**

ethyl acetate/ petroleum ether = 1:2; light yellow solid; 77% yield (119.4 mg); mp: 72-74 °C;  $^1\text{H}$  NMR (400 MHz,  $\text{CDCl}_3$ )  $\delta$  7.31 (s, 1H), 6.45 (s, 1H), 5.02 (dd,  $J = 11.2, 7.1$  Hz, 1H), 4.20 (q,  $J = 7.1$  Hz, 2H), 3.86 (s, 3H), 3.79 (s, 3H), 3.78 (s, 3H), 3.75 – 3.63 (m, 2H), 1.26 (t,  $J = 7.1$  Hz, 3H);  $^{13}\text{C}$  NMR (100 MHz,  $\text{CDCl}_3$ )  $\delta$  170.6, 154.9, 152.5, 151.7, 143.0, 111.1, 108.6, 96.9, 77.8, 61.5, 56.14, 56.11, 55.8, 41.4, 13.9; HRMS (ESI-TOF): Anal. Calcd. For  $\text{C}_{15}\text{H}_{19}\text{NNaO}_6^+$ : 332.1105, Found: 332.1104; IR (neat,  $\text{cm}^{-1}$ ):  $\nu$  3003, 2978, 2939, 2839, 1715, 1462, 1271, 1207, 1162, 1025, 797.

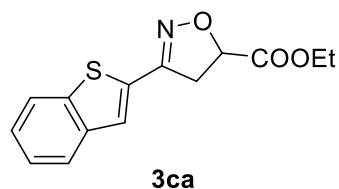

**Ethyl 3-(benzo[b]thiophen-2-yl)-4,5-dihydroisoxazole-5-carboxylate (3ca)**

ethyl acetate/ petroleum ether = 1:5; light yellow solid; 69% yield (94.7 mg); mp: 97-99 °C;  $^1\text{H}$  NMR (400 MHz,  $\text{CDCl}_3$ )  $\delta$  7.83 – 7.74 (m, 2H), 7.42 – 7.32 (m, 3H), 5.20 (dd,  $J = 11.2, 7.2$  Hz, 1H), 4.28 (q,  $J = 7.0$  Hz, 2H), 3.80 – 3.62 (m, 2H), 1.33 (t,  $J = 7.0$  Hz, 3H);  $^{13}\text{C}$  NMR (100 MHz,  $\text{CDCl}_3$ )  $\delta$  169.7, 152.3, 140.5, 138.8, 131.0, 126.14, 126.12, 124.7, 124.2, 122.4, 78.6, 62.1, 39.0, 14.0; HRMS (EI-TOF): Anal. Calcd. For  $\text{C}_{14}\text{H}_{13}\text{NO}_3\text{S}$ : 275.0616, Found: 275.0614; IR (neat,  $\text{cm}^{-1}$ ):  $\nu$  2983, 2961, 2922, 1747, 1193, 1163, 1153, 898, 832, 749, 727.

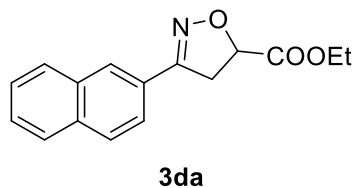

**Ethyl 3-(naphthalen-2-yl)-4,5-dihydroisoxazole-5-carboxylate (3da)**

ethyl acetate/ petroleum ether = 1:6; white solid; 69% yield (92.9 mg); mp: 63-64 °C;  $^1\text{H}$  NMR (400 MHz,  $\text{CDCl}_3$ )  $\delta$  7.94 (dd,  $J = 8.7, 1.8$  Hz, 1H), 7.88 (s, 1H), 7.85 – 7.78 (m, 3H), 7.54 – 7.46 (m, 2H), 5.20 (dd,  $J = 11.3, 7.1$  Hz, 1H), 4.27 (q,  $J = 7.1$  Hz, 2H), 3.76 (dd,  $J = 16.8, 7.1$  Hz, 1H), 3.69 (dd,  $J = 16.8, 11.3$  Hz, 1H), 1.32 (t,  $J = 7.1$  Hz, 3H);  $^{13}\text{C}$  NMR (100 MHz,  $\text{CDCl}_3$ )  $\delta$  170.1, 156.0, 134.0, 132.7, 128.4, 128.3, 127.7, 127.2, 127.1, 126.6, 126.0, 123.4, 78.1, 61.9, 38.6, 14.0; HRMS (ESI-TOF): Anal. Calcd. For  $\text{C}_{16}\text{H}_{15}\text{NNaO}_3^+$ : 292.0944, Found: 292.0940; IR (neat,  $\text{cm}^{-1}$ ):  $\nu$  3062, 2983, 2955, 1743, 1200, 1191, 1162, 898, 821, 749.



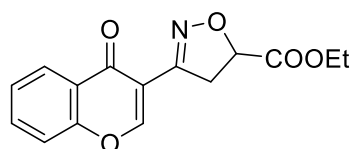

**3ea**

**Ethyl 3-(4-oxo-4H-chromen-3-yl)-4,5-dihydroisoxazole-5-carboxylate (3ea)**

ethyl acetate/ petroleum ether =1:4; light yellow solid; 75% yield (107.5 mg); mp: 99-101 °C; <sup>1</sup>H NMR (400 MHz, CDCl<sub>3</sub>) δ 8.46 (s, 1H), 8.16 (dd, *J* = 8.1, 1.7 Hz, 1H), 7.67 (ddd, *J* = 8.7, 7.1, 1.7 Hz, 1H), 7.48 – 7.37 (m, 2H), 5.10 (dd, *J* = 11.8, 6.9 Hz, 1H), 4.22 (q, *J* = 7.1 Hz, 2H), 3.90 (dd, *J* = 18.1, 11.8 Hz, 1H), 3.75 (dd, *J* = 18.1, 6.9 Hz, 1H), 1.27 (t, *J* = 7.1 Hz, 3H); <sup>13</sup>C NMR (100 MHz, CDCl<sub>3</sub>) δ 175.0, 170.0, 155.8, 154.9, 151.7, 134.2, 125.9, 125.8, 123.9, 118.2, 114.4, 77.9, 61.7, 40.4, 14.0; HRMS (ESI-TOF): Anal. Calcd. For C<sub>15</sub>H<sub>13</sub>NNaO<sub>5</sub><sup>+</sup>: 310.0686, Found: 310.0690; IR (neat, cm<sup>-1</sup>): ν 2977, 2924, 1754, 1650, 1615, 1465, 1189, 1034, 813, 759.

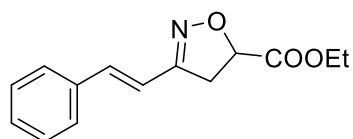

**3fa**

**Ethyl (E)-3-styryl-4,5-dihydroisoxazole-5-carboxylate (3fa)**

ethyl acetate/ petroleum ether =1:6; white solid; 58% yield (71.4 mg); mp: 64-66 °C; <sup>1</sup>H NMR (400 MHz, CDCl<sub>3</sub>) δ 7.49 – 7.42 (m, 2H), 7.39 – 7.29 (m, 3H), 7.06 (d, *J* = 16.5 Hz, 1H), 6.77 (d, *J* = 16.5 Hz, 1H), 5.10 (dd, *J* = 10.8, 7.5 Hz, 1H), 4.26 (q, *J* = 7.1 Hz, 2H), 3.49 (d, *J* = 7.5 Hz, 1H), 3.48 (d, *J* = 10.8 Hz, 1H), 1.32 (t, *J* = 7.1 Hz, 3H); <sup>13</sup>C NMR (100 MHz, CDCl<sub>3</sub>) δ 170.0, 156.9, 137.4, 135.4, 129.1, 128.8, 127.0, 116.8, 78.0, 61.9, 37.4, 14.0; HRMS (ESI-TOF): Anal. Calcd. For C<sub>14</sub>H<sub>15</sub>NNaO<sub>3</sub><sup>+</sup>: 268.0944, Found: 268.0936; IR (neat, cm<sup>-1</sup>): ν 3069, 2978, 2924, 1737, 1589, 1362, 1340, 1162, 1073, 894, 882, 785, 691.

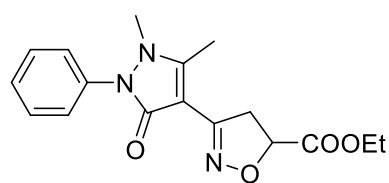

**3ga**

**Ethyl 3-(1,5-dimethyl-3-oxo-2-phenyl-2,3-dihydro-1H-pyrazol-4-yl)-4,5-dihydroisoxazole-5-carboxylate (3ga)**

ethyl acetate/ petroleum ether =4:1; white solid; 87% yield (143.9 mg); mp: 148-149 °C; <sup>1</sup>H NMR (400 MHz, CDCl<sub>3</sub>) δ 7.48 – 7.42 (m, 2H), 7.36 – 7.27 (m, 3H), 4.96 (dd, *J* = 10.5, 7.6 Hz, 1H), 4.19 (q, *J* = 7.1 Hz, 2H), 3.85 – 3.76 (m, 2H), 3.23 (s, 3H), 2.56 (s, 3H), 1.25 (t, *J* = 7.1 Hz, 3H); <sup>13</sup>C NMR (100 MHz, CDCl<sub>3</sub>) δ 170.6, 163.6, 153.4, 151.3, 134.1, 129.3, 127.7, 125.3, 97.0, 76.2, 61.5, 40.7, 34.5, 14.0, 13.1; HRMS (ESI-TOF): Anal. Calcd. For C<sub>17</sub>H<sub>20</sub>N<sub>3</sub>O<sub>4</sub><sup>+</sup>: 330.1448, Found: 330.1468; IR (neat, cm<sup>-1</sup>): ν 2988, 2918, 2852, 1738, 1650, 1548, 1310, 1281, 1089, 1032, 976, 854, 751.

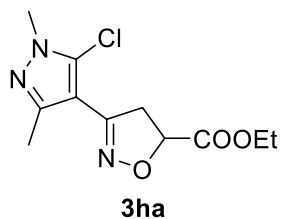

**Ethyl 3-(5-chloro-1,3-dimethyl-1H-pyrazol-4-yl)-4,5-dihydroisoxazole-5-carboxylate (3ha)**

ethyl acetate/ petroleum ether =1:2; white solid; 73% yield (99.1 mg); mp: 107-108 °C; <sup>1</sup>H NMR (400 MHz, CDCl<sub>3</sub>) δ 5.02 (dd, *J* = 10.7, 7.5 Hz, 1H), 4.21 (q, *J* = 7.1 Hz, 2H), 3.75 (s, 3H), 3.65 (d, *J* = 7.5 Hz, 1H), 3.64 (d, *J* = 10.7 Hz, 1H), 2.36 (s, 3H), 1.27 (t, *J* = 7.1 Hz, 3H); <sup>13</sup>C NMR (100 MHz, CDCl<sub>3</sub>) δ 170.1, 149.5, 148.3, 127.1, 106.3, 76.9, 61.8, 40.0, 36.1, 15.1, 14.0; HRMS (ESI-TOF): Anal. Calcd. For C<sub>11</sub>H<sub>14</sub><sup>35</sup>ClN<sub>3</sub>NaO<sub>3</sub><sup>+</sup>: 294.0616, C<sub>11</sub>H<sub>14</sub><sup>37</sup>ClN<sub>3</sub>NaO<sub>3</sub><sup>+</sup>: 296.0586, Found: 294.0625, 296.0592; IR (neat, cm<sup>-1</sup>): ν 2996, 2937, 2851, 1729, 1529, 1367, 1275, 1028, 892, 808.

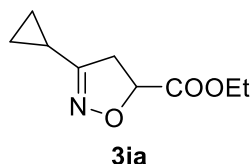

**Ethyl 3-cyclopropyl-4,5-dihydroisoxazole-5-carboxylate (3ia)**

ethyl acetate/ petroleum ether =1:5; colorless liquid; 41% yield (37.9 mg); <sup>1</sup>H NMR (400 MHz, CDCl<sub>3</sub>) δ 4.93 (dd, *J* = 9.4, 8.5 Hz, 1H), 4.22 (q, *J* = 7.1 Hz, 2H), 3.08 – 3.04 (m, 2H), 1.80 – 1.73 (m, 1H), 1.29 (t, *J* = 7.1 Hz, 3H), 0.93 – 0.88 (m, 2H), 0.80 – 0.75 (m, 2H); <sup>13</sup>C NMR (100 MHz, CDCl<sub>3</sub>) δ 170.4, 160.4, 77.0, 61.8, 39.1, 14.0, 8.5, 6.4, 6.0; HRMS (ESI-TOF): Anal. Calcd. For C<sub>9</sub>H<sub>13</sub>NNaO<sub>3</sub><sup>+</sup>: 206.0788, Found: 206.0785; IR (neat, cm<sup>-1</sup>): ν 3092, 2984, 2939, 2876, 1734, 1200, 1029, 874, 848.

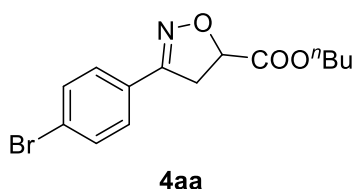

**Butyl 3-(4-bromophenyl)-4,5-dihydroisoxazole-5-carboxylate (4aa)**

ethyl acetate/ petroleum ether =1:20; white solid; 88% yield (131.4 mg); mp: 58-59 °C; <sup>1</sup>H NMR (400 MHz, CDCl<sub>3</sub>) δ 7.52 (s, 4H), 5.16 (dd, *J* = 10.4, 8.0 Hz, 1H), 4.19 (t, *J* = 6.7 Hz, 2H), 3.63 – 3.56 (m, 2H), 1.70 – 1.61 (m, 2H), 1.43– 1.32 (m, 2H), 0.92 (t, *J* = 7.4 Hz, 3H); <sup>13</sup>C NMR (100 MHz, CDCl<sub>3</sub>) δ 169.9, 155.1, 131.9, 128.2, 127.5, 124.7, 78.2, 65.8, 38.5, 30.4, 18.9, 13.6; <sup>1</sup>HRMS (ESI-TOF): Anal. Calcd. For C<sub>14</sub>H<sub>16</sub><sup>79</sup>BrNNaO<sub>3</sub><sup>+</sup>: 348.0206, C<sub>14</sub>H<sub>16</sub><sup>81</sup>BrNNaO<sub>3</sub><sup>+</sup>: 350.0185, Found: 348.0188, 350.0204; IR (neat, cm<sup>-1</sup>): ν 2958, 2931, 2872, 1738, 1210, 1058, 1006, 888, 861, 819.

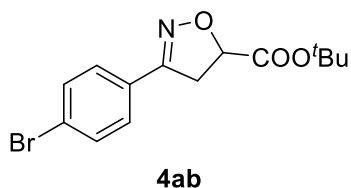

**tert-Butyl 3-(4-bromophenyl)-4,5-dihydroisoxazole-5-carboxylate (4ab)**

ethyl acetate/ petroleum ether =1:25; white solid; 80% yield (130.6 mg); mp: 66-68 °C; <sup>1</sup>H NMR (400 MHz, CDCl<sub>3</sub>) δ 7.50 (s, 4H), 5.03 (t, *J* = 9.4 Hz, 1H), 3.53 (d, *J* = 9.4 Hz, 2H), 1.48 (s, 9H); <sup>13</sup>C NMR (100 MHz, CDCl<sub>3</sub>) δ 168.8, 154.9, 131.8, 128.2, 127.6, 124.5, 82.7, 78.9, 38.3, 27.8; <sup>1</sup>HRMS (ESI-TOF): Anal. Calcd. For C<sub>14</sub>H<sub>16</sub><sup>79</sup>BrNNaO<sub>3</sub><sup>+</sup>: 348.0206, C<sub>14</sub>H<sub>16</sub><sup>81</sup>BrNNaO<sub>3</sub><sup>+</sup>: 350.0185, Found: 348.0195, 350.0200; IR (neat, cm<sup>-1</sup>): ν 2976, 2935, 1733, 1590, 1346, 1149, 1007, 894, 866, 834, 820.

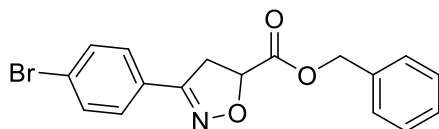**4ac****Benzyl 3-(4-bromophenyl)-4,5-dihydroisoxazole-5-carboxylate (4ac)**

ethyl acetate/ petroleum ether =1:6; white solid; 83% yield (149.6 mg); mp: 74-76 °C; <sup>1</sup>H NMR (400 MHz, CDCl<sub>3</sub>) δ 7.51 (s, 4H), 7.39 – 7.32 (m, 5H), 5.24 – 5.17 (m, 3H), 3.59 (d, *J* = 7.7 Hz, 1H), 3.58 (d, *J* = 10.7 Hz, 1H); <sup>13</sup>C NMR (100 MHz, CDCl<sub>3</sub>) δ 169.6, 155.1, 134.8, 131.8, 128.5, 128.4, 128.2, 127.3, 124.7, 78.1, 67.4, 38.4; <sup>1</sup>HRMS (ESI-TOF): Anal. Calcd. For C<sub>17</sub>H<sub>14</sub><sup>79</sup>BrNNaO<sub>3</sub><sup>+</sup>: 382.0049, C<sub>17</sub>H<sub>14</sub><sup>81</sup>BrNNaO<sub>3</sub><sup>+</sup>: 384.0029, Found: 382.0042, 384.0030; IR (neat, cm<sup>-1</sup>): ν 3068, 3037, 2955, 1755, 1174, 1162, 881, 825, 734, 693.

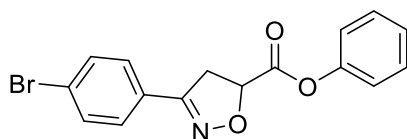**4ad****Phenyl 3-(4-bromophenyl)-4,5-dihydroisoxazole-5-carboxylate (4ad)**

ethyl acetate/ petroleum ether =1:6; yellow solid; 67% yield (115.6 mg); mp: 109-110 °C; <sup>1</sup>H NMR (400 MHz, CDCl<sub>3</sub>) δ 7.59 – 7.50 (m, 4H), 7.43 – 7.33 (m, 2H), 7.28 – 7.21 (m, 1H), 7.16 – 7.10 (m, 2H), 5.41 (dd, *J* = 11.3, 7.0 Hz, 1H), 3.77 (dd, *J* = 17.0, 7.0 Hz, 1H), 3.70 (dd, *J* = 17.0, 11.3 Hz, 1H); <sup>13</sup>C NMR (100 MHz, CDCl<sub>3</sub>) δ 168.3, 155.2, 150.1, 131.9, 129.4, 128.3, 126.2, 124.8, 121.0, 78.1, 38.5; <sup>1</sup>HRMS (ESI-TOF): Anal. Calcd. For C<sub>16</sub>H<sub>12</sub><sup>79</sup>BrNNaO<sub>3</sub><sup>+</sup>: 367.9893, C<sub>16</sub>H<sub>12</sub><sup>81</sup>BrNNaO<sub>3</sub><sup>+</sup>: 369.9872, Found: 367.9881, 369.9859; IR (neat, cm<sup>-1</sup>): ν 3070, 3043, 2976, 2927, 1773, 1589, 1489, 1193, 1162, 1069, 818, 748.

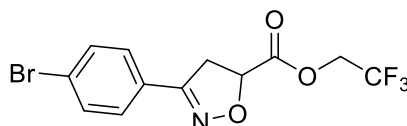**4ae****2,2,2-Trifluoroethyl 3-(4-bromophenyl)-4,5-dihydroisoxazole-5-carboxylate (4ae)**

ethyl acetate/ petroleum ether =1:6; white solid; 60% yield (105.5 mg); mp: 72-74 °C; <sup>1</sup>H NMR (400 MHz, CDCl<sub>3</sub>) δ 7.58 – 7.52 (m, 4H), 5.28 (dd, *J* = 11.1, 7.0 Hz, 1H), 4.65 (dq, *J* = 12.6, 8.3 Hz, 1H), 4.53 (dq, *J* = 12.6, 8.3 Hz, 1H), 3.76 – 3.56 (m, 2H); <sup>13</sup>C NMR (100 MHz, CDCl<sub>3</sub>) δ 168.4, 155.1, 132.1, 128.4, 127.1, 125.1, 122.5 (q, *J* = 277.2 Hz), 77.5, 61.2 (q, *J* = 37.1 Hz), 38.7; <sup>19</sup>F NMR (376 MHz,

CDCl<sub>3</sub>)  $\delta$  -73.7; HRMS (ESI-TOF): Anal. Calcd. For C<sub>12</sub>H<sub>9</sub><sup>79</sup>BrF<sub>3</sub>NNaO<sub>3</sub><sup>+</sup>: 373.9610, C<sub>12</sub>H<sub>9</sub><sup>81</sup>BrF<sub>3</sub>NNaO<sub>3</sub><sup>+</sup>: 375.9590, Found: 373.9605, 375.9593; IR (neat, cm<sup>-1</sup>):  $\nu$  2991, 2977, 2923, 1772, 1274, 1176, 1161, 1054, 971, 894, 824.

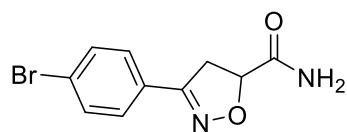

**4af**

**3-(4-Bromophenyl)-4,5-dihydroisoxazole-5-carboxamide (4af)**

ethyl acetate/ petroleum ether =2:1; white solid; 53% yield (71.5 mg); mp: >200 °C; <sup>1</sup>H NMR (400 MHz, DMSO-d<sub>6</sub>)  $\delta$  7.71 – 7.58 (s, 5H), 7.44 (s, 1H), 5.07 (dd, *J* = 11.6, 7.0 Hz, 1H), 3.66 (dd, *J* = 17.3, 11.7 Hz, 1H), 3.53 (dd, *J* = 17.3, 7.0 Hz, 1H); <sup>13</sup>C NMR (100 MHz, DMSO-d<sub>6</sub>)  $\delta$  171.9, 155.8, 131.9, 128.8, 128.0, 123.8, 79.3, 38.3; HRMS (ESI-TOF): Anal. Calcd. For C<sub>10</sub>H<sub>9</sub><sup>79</sup>BrN<sub>2</sub>NaO<sub>2</sub><sup>+</sup>: 290.9740, C<sub>10</sub>H<sub>9</sub><sup>81</sup>BrN<sub>2</sub>NaO<sub>2</sub><sup>+</sup>: 292.9719, Found: 290.9724, 292.9711; IR (neat, cm<sup>-1</sup>):  $\nu$  3410, 3185, 2969, 2928, 1650, 1591, 1401, 1010, 896, 820.

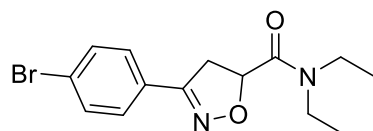

**4ag**

**3-(4-Bromophenyl)-N,N-diethyl-4,5-dihydroisoxazole-5-carboxamide (4ag)**

ethyl acetate/ petroleum ether =1:2; white solid; 85% yield (137.9 mg); mp: 114-116 °C; <sup>1</sup>H NMR (400 MHz, Benzene-d<sub>6</sub>)  $\delta$  7.22 (d, *J* = 8.4 Hz, 2H), 7.14 (d, *J* = 8.4 Hz, 2H), 4.78 (dd, *J* = 11.2, 7.7 Hz, 1H), 4.11 (dd, *J* = 16.6, 7.7 Hz, 1H), 3.18 – 3.07 (m, 3H), 3.00 (dq, *J* = 14.4, 7.1 Hz, 1H), 2.63 (dd, *J* = 16.6, 11.2 Hz, 1H), 0.93 (t, *J* = 7.1 Hz, 3H), 0.88 (t, *J* = 7.1 Hz, 3H); <sup>13</sup>C NMR (100 MHz, Benzene-d<sub>6</sub>)  $\delta$  166.3, 156.3, 132.0, 128.7, 128.6, 124.3, 78.8, 41.8, 40.7, 36.7, 14.4, 12.8; HRMS (ESI-TOF): Anal. Calcd. For C<sub>14</sub>H<sub>17</sub><sup>79</sup>BrN<sub>2</sub>NaO<sub>2</sub><sup>+</sup>: 347.0366, C<sub>14</sub>H<sub>17</sub><sup>81</sup>BrN<sub>2</sub>NaO<sub>2</sub><sup>+</sup>: 349.0345, Found: 347.0332, 349.0329; IR (neat, cm<sup>-1</sup>):  $\nu$  2968, 2930, 2871, 1633, 1261, 1068, 1005, 895, 830.

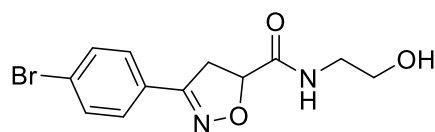

**4ah**

**3-(4-Bromophenyl)-N-(2-hydroxyethyl)-4,5-dihydroisoxazole-5-carboxamide (4ah)**

ethyl acetate/ petroleum ether =6:1; white solid; 45% yield (69.8 mg); mp: 135-137 °C; <sup>1</sup>H NMR (400 MHz, DMSO-d<sub>6</sub>)  $\delta$  8.14 (t, *J* = 5.7 Hz, 1H), 7.68 – 7.60 (m, 4H), 5.12 (dd, *J* = 11.6, 7.0 Hz, 1H), 4.71 (t, *J* = 5.5 Hz, 1H), 3.68 (dd, *J* = 17.2, 11.6 Hz, 1H), 3.54 (dd, *J* = 17.2, 7.0 Hz, 1H), 3.45 – 3.40 (m, 2H), 3.26 – 3.10 (m, 2H); <sup>13</sup>C NMR (100 MHz, DMSO-d<sub>6</sub>)  $\delta$  169.7, 156.0, 131.9, 128.8, 128.0, 123.8, 79.4, 59.6, 41.6, 38.5; HRMS (ESI-TOF): Anal. Calcd. For C<sub>12</sub>H<sub>13</sub><sup>79</sup>BrN<sub>2</sub>NaO<sub>3</sub><sup>+</sup>: 335.0002, C<sub>12</sub>H<sub>13</sub><sup>81</sup>BrN<sub>2</sub>NaO<sub>3</sub><sup>+</sup>: 336.9981, Found: 334.9983, 336.9962; IR (neat, cm<sup>-1</sup>):  $\nu$  3240, 2950, 2924, 2887, 1641, 1535, 1204, 1058, 1038, 902, 825.

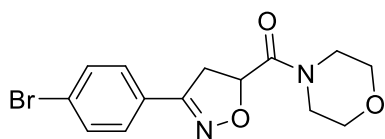

**4ai**

**(3-(4-Bromophenyl)-4,5-dihydroisoxazol-5-yl)(morpholino)methanone (4ai)**

ethyl acetate/ petroleum ether =1:1; white solid; 75% yield (127.8 mg); mp: 120-121 °C; <sup>1</sup>H NMR (400 MHz, DMSO-d<sub>6</sub>) δ 7.73 – 7.59 (m, 4H), 5.62 (dd, *J* = 11.4, 7.2 Hz, 1H), 3.83 (dd, *J* = 17.0, 7.2 Hz, 1H), 3.73 – 3.43 (m, 9H); <sup>13</sup>C NMR (100 MHz, DMSO-d<sub>6</sub>) δ 166.2, 156.2, 131.9, 128.8, 128.0, 123.8, 77.2, 66.2, 66.1, 45.8, 42.3, 36.6; HRMS (ESI-TOF): Anal. Calcd. For C<sub>14</sub>H<sub>15</sub><sup>79</sup>BrN<sub>2</sub>NaO<sub>3</sub><sup>+</sup>: 361.0158, C<sub>14</sub>H<sub>15</sub><sup>81</sup>BrN<sub>2</sub>NaO<sub>3</sub><sup>+</sup>: 363.0138, Found: 361.0139, 363.0139; IR (neat, cm<sup>-1</sup>): ν 2969, 2930, 2860, 1637, 1422, 1234, 1113, 1024, 891, 826.

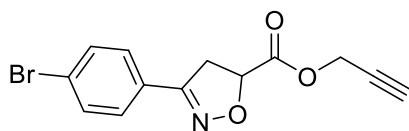

**4aj**

**Prop-2-yn-1-yl 3-(4-bromophenyl)-4,5-dihydroisoxazole-5-carboxylate (4aj)**

ethyl acetate/ petroleum ether =1:6; light yellow solid; 60% yield (92.7 mg); mp: 57-58 °C; <sup>1</sup>H NMR (400 MHz, CDCl<sub>3</sub>) δ 7.51 (s, 4H), 5.21 (t, *J* = 9.2 Hz, 1H), 4.81 (dd, *J* = 15.5, 2.5 Hz, 1H), 4.75 (dd, *J* = 15.5, 2.5 Hz, 1H), 3.62 (d, *J* = 9.2 Hz, 2H), 2.52 (t, *J* = 2.5 Hz, 1H); <sup>13</sup>C NMR (100 MHz, CDCl<sub>3</sub>) δ 169.1, 155.1, 132.0, 128.3, 127.2, 124.8, 77.8, 76.6, 75.8, 53.2, 38.5; HRMS (ESI-TOF): Anal. Calcd. For C<sub>13</sub>H<sub>10</sub><sup>79</sup>BrNNaO<sub>3</sub><sup>+</sup>: 329.9736, C<sub>13</sub>H<sub>10</sub><sup>81</sup>BrNNaO<sub>3</sub><sup>+</sup>: 331.9716, Found: 329.9721, 331.9710; IR (neat, cm<sup>-1</sup>): ν 3277, 2977, 2945, 1742, 1219, 1204, 1069, 1021, 895, 884, 821, 638.

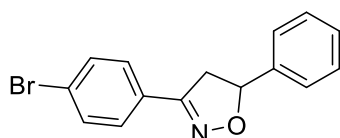

**4ak**

**3-(4-Bromophenyl)-5-phenyl-4,5-dihydroisoxazole (4ak)**

ethyl acetate/ petroleum ether =1:30; white solid; 56% yield (84.7 mg); mp: 104-106 °C; <sup>1</sup>H NMR (400 MHz, CDCl<sub>3</sub>) δ 7.58 – 7.51 (m, 4H), 7.41 – 7.30 (m, 5H), 5.75 (dd, *J* = 11.0, 8.3 Hz, 1H), 3.75 (dd, *J* = 16.6, 11.0 Hz, 1H), 3.31 (dd, *J* = 16.6, 8.3 Hz, 1H); <sup>13</sup>C NMR (100 MHz, CDCl<sub>3</sub>) δ 155.3, 140.6, 131.9, 128.8, 128.4, 128.3, 128.1, 125.8, 124.4, 82.8, 42.9; HRMS (ESI-TOF): Anal. Calcd. For C<sub>15</sub>H<sub>12</sub><sup>79</sup>BrNNaO<sup>+</sup>: 323.9994, C<sub>15</sub>H<sub>12</sub><sup>81</sup>BrNNaO<sup>+</sup>: 325.9974, Found: 323.9984, 325.9967; IR (neat, cm<sup>-1</sup>): ν 3068, 3041, 2968, 2921, 2851, 1587, 1335, 1159, 1007, 901, 830, 757, 697, 671.

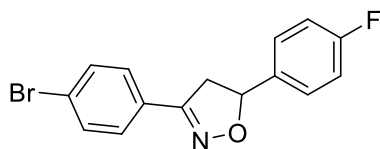

**4al**

**3-(4-Bromophenyl)-5-(4-fluorophenyl)-4,5-dihydroisoxazole (4al)**

ethyl acetate/ petroleum ether =1:30; white solid; 52% yield (83.1 mg); mp: 104-105 °C; <sup>1</sup>H NMR (400 MHz, CDCl<sub>3</sub>) δ 7.55 (s, 4H), 7.40 – 7.32 (m, 2H), 7.10 – 7.02 (m, 2H), 5.73 (dd, *J* = 11.0, 8.3 Hz, 1H), 3.74 (dd, *J* = 16.6, 11.0 Hz, 1H), 3.27 (dd, *J* = 16.6, 8.3 Hz, 1H); <sup>13</sup>C NMR (100 MHz, CDCl<sub>3</sub>) δ 162.6 (d, *J* = 247.0 Hz), 155.3, 136.4 (d, *J* = 3.2 Hz), 132.0, 128.3, 128.1, 127.7 (d, *J* = 8.2 Hz), 124.5, 115.7 (d, *J* = 21.6 Hz), 82.2, 42.9; <sup>19</sup>F NMR (376 MHz, CDCl<sub>3</sub>) δ -113.6; HRMS (ESI-TOF): Anal. Calcd. For C<sub>15</sub>H<sub>11</sub><sup>79</sup>BrFNNaO<sup>+</sup>: 341.9900, C<sub>15</sub>H<sub>11</sub><sup>81</sup>BrFNNaO<sup>+</sup>: 343.9880, Found: 341.9896, 343.9894; IR (neat, cm<sup>-1</sup>): ν 2975, 2927, 1591, 1347, 1193, 1161, 1009, 889, 820.

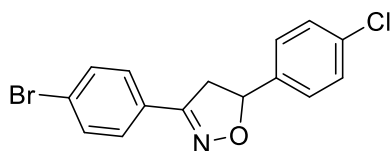

**4am**

**3-(4-Bromophenyl)-5-(4-chlorophenyl)-4,5-dihydroisoxazole (4am)**

ethyl acetate/ petroleum ether =1:30; white solid; 46% yield (77.1 mg); mp: 111-113 °C; <sup>1</sup>H NMR (400 MHz, CDCl<sub>3</sub>) δ 7.53 (s, 4H), 7.37 – 7.28 (m, 4H), 5.71 (dd, *J* = 11.0, 8.2 Hz, 1H), 3.74 (dd, *J* = 16.6, 11.0 Hz, 1H), 3.25 (dd, *J* = 16.6, 8.2 Hz, 1H); <sup>13</sup>C NMR (100 MHz, CDCl<sub>3</sub>) δ 155.2, 139.1, 134.1, 131.9, 128.9, 128.1, 127.2, 124.5, 82.0, 42.9; HRMS (ESI-TOF): Anal. Calcd. For C<sub>15</sub>H<sub>12</sub><sup>79</sup>BrClNO<sup>+</sup>: 335.9785, C<sub>15</sub>H<sub>12</sub><sup>81</sup>BrClNO<sup>+</sup>: 337.9765, Found: 335.9819, 337.9777; IR (neat, cm<sup>-1</sup>): ν 3068, 2959, 2922, 1589, 1488, 1348, 1093, 1009, 908, 837, 823.

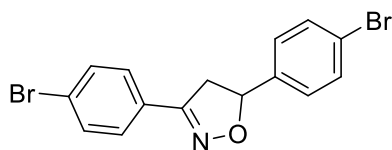

**4an**

**3,5-Bis(4-bromophenyl)-4,5-dihydroisoxazole (4an)**

ethyl acetate/ petroleum ether =1:30; white solid; 50% yield (95.8 mg); mp: 130-131 °C; <sup>1</sup>H NMR (400 MHz, CDCl<sub>3</sub>) δ 7.52 (s, 4H), 7.48 (d, *J* = 8.4 Hz, 2H), 7.24 (d, *J* = 8.4 Hz, 2H), 5.68 (dd, *J* = 11.0, 8.1 Hz, 1H), 3.74 (dd, *J* = 16.7, 11.0 Hz, 1H), 3.24 (dd, *J* = 16.7, 8.1 Hz, 1H); <sup>13</sup>C NMR (100 MHz, CDCl<sub>3</sub>) δ 155.2, 139.6, 131.9, 131.8, 128.09, 128.07, 127.5, 124.5, 122.2, 82.0, 42.8; HRMS (ESI-TOF): Anal. Calcd. For C<sub>15</sub>H<sub>12</sub><sup>79</sup>Br<sup>79</sup>Br NO<sup>+</sup>: 379.9280, C<sub>15</sub>H<sub>12</sub><sup>79</sup>Br<sup>81</sup>Br NO<sup>+</sup>: 381.9260, C<sub>15</sub>H<sub>12</sub><sup>81</sup>Br<sup>81</sup>Br NO<sup>+</sup>: 383.9239, Found: 379.9261, 381.9252, 383.9222; IR (neat, cm<sup>-1</sup>): ν 3062, 2969, 2917, 1589, 1488, 1348, 1071, 1008, 909, 837, 820.

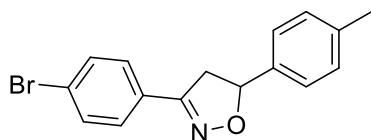

**4ao**

**3-(4-Bromophenyl)-5-(p-tolyl)-4,5-dihydroisoxazole (4ao)**

ethyl acetate/ petroleum ether =1:30; white solid; 55% yield (87.3 mg); mp: 126-128 °C; <sup>1</sup>H NMR (400 MHz, CDCl<sub>3</sub>) δ 7.60 – 7.48 (m, 4H), 7.26 (d, *J* = 8.0 Hz, 2H), 7.18 (d, *J* = 8.0 Hz, 2H), 5.70 (dd, *J* = 11.0, 8.5 Hz, 1H), 3.70 (dd, *J* = 16.7, 11.0 Hz, 1H), 3.28 (dd, *J* = 16.7, 8.5 Hz, 1H), 2.34 (s, 3H); <sup>13</sup>C NMR (100 MHz, CDCl<sub>3</sub>) δ 155.3, 138.1, 137.5, 131.9, 129.4, 128.5, 128.1, 125.8, 124.3, 82.9, 42.7, 21.1; HRMS (ESI-TOF): Anal. Calcd. For C<sub>16</sub>H<sub>14</sub><sup>79</sup>BrNNaO<sup>+</sup>: 338.0151, C<sub>16</sub>H<sub>14</sub><sup>81</sup>BrNNaO<sup>+</sup>: 340.0131, Found: 338.0157, 340.0122; IR (neat, cm<sup>-1</sup>): ν 2977, 2917, 2860, 1587, 1397, 1344, 1070, 1006, 905, 831, 813.

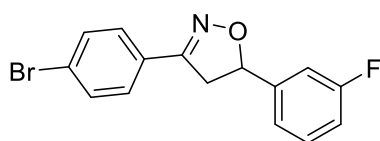

**4ap**

**3-(4-Bromophenyl)-5-(3-fluorophenyl)-4,5-dihydroisoxazole (4ap)**

ethyl acetate/ petroleum ether =1:30; white solid; 57% yield (91.2 mg); mp: 85-86 °C; <sup>1</sup>H NMR (400 MHz, CDCl<sub>3</sub>) δ 7.54 (s, 4H), 7.37 – 7.31 (m, 1H), 7.18 – 7.07 (m, 2H), 7.04 – 6.98 (m, 1H), 5.74 (dd, *J* = 11.1, 8.0 Hz, 1H), 3.77 (dd, *J* = 16.6, 11.1 Hz, 1H), 3.28 (dd, *J* = 16.6, 8.0 Hz, 1H); <sup>13</sup>C NMR (100 MHz, CDCl<sub>3</sub>) δ 163.0 (d, *J* = 246.7 Hz), 155.2, 143.3 (d, *J* = 6.9 Hz), 132.0, 130.4 (d, *J* = 8.1 Hz), 128.14, 128.10, 124.5, 121.3 (d, *J* = 3.0 Hz), 115.2 (d, *J* = 21.2 Hz), 112.8 (d, *J* = 22.4 Hz), 81.9 (d, *J* = 1.8 Hz), 42.9; <sup>19</sup>F NMR (376 MHz, CDCl<sub>3</sub>) δ -112.0; HRMS (ESI-TOF): Anal. Calcd. For C<sub>15</sub>H<sub>11</sub><sup>79</sup>BrFNNaO<sup>+</sup>: 341.9900, C<sub>15</sub>H<sub>11</sub><sup>81</sup>BrFNNaO<sup>+</sup>: 343.9880, Found: 341.9906, 343.9900; IR (neat, cm<sup>-1</sup>): ν 2974, 2925, 2891, 1588, 1485, 1454, 1251, 1143, 1071, 1053, 897, 873, 830, 784, 692.

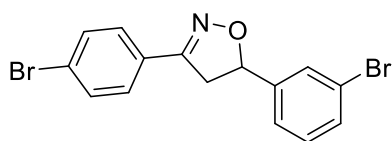

**4aq**

**5-(3-Bromophenyl)-3-(4-bromophenyl)-4,5-dihydroisoxazole (4aq)**

ethyl acetate/ petroleum ether =1:30; white solid; 57% yield (109.2 mg); mp: 73-74 °C; <sup>1</sup>H NMR (400 MHz, CDCl<sub>3</sub>) δ 7.53 (s, 5H), 7.46 – 7.42 (m, 1H), 7.32 – 7.28 (m, 1H), 7.26 – 7.21 (m, 1H), 5.70 (dd, *J* = 11.1, 8.0 Hz, 1H), 3.75 (dd, *J* = 16.7, 11.1 Hz, 1H), 3.27 (dd, *J* = 16.7, 8.0 Hz, 1H); <sup>13</sup>C NMR (100 MHz, CDCl<sub>3</sub>) δ 155.2, 143.0, 131.9, 131.3, 130.3, 128.8, 128.1, 128.0, 124.5, 124.3, 122.8, 81.8, 42.9; HRMS (ESI-TOF): Anal. Calcd. For C<sub>15</sub>H<sub>12</sub><sup>79</sup>Br<sup>79</sup>Br NO<sup>+</sup>: 379.9280, C<sub>15</sub>H<sub>12</sub><sup>79</sup>Br<sup>81</sup>Br NO<sup>+</sup>: 381.9260, C<sub>15</sub>H<sub>12</sub><sup>81</sup>Br<sup>81</sup>Br NO<sup>+</sup>: 383.9239, Found: 379.9266, 381.9236, 383.9210; IR (neat, cm<sup>-1</sup>): ν 3093, 3071, 2974, 2919, 1589, 1569, 1340, 1161, 1072, 894, 881, 830, 818, 785, 691, 661.

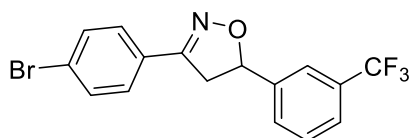

**4ar**

**3-(4-Bromophenyl)-5-(3-(trifluoromethyl)phenyl)-4,5-dihydroisoxazole (4ar)**

ethyl acetate/ petroleum ether =1:30; white solid; 56% yield (103.8 mg); mp: 81-83 °C; <sup>1</sup>H NMR (400 MHz, CDCl<sub>3</sub>) δ 7.65 (s, 1H), 7.60 – 7.47 (m, 7H), 5.80 (dd, *J* = 11.1, 8.1 Hz, 1H), 3.81 (dd, *J* = 16.7, 11.1 Hz, 1H), 3.30 (dd, *J* = 16.7, 8.1 Hz, 1H); <sup>13</sup>C NMR (100 MHz, CDCl<sub>3</sub>) δ 155.2, 141.7, 132.0, 131.1 (q, *J* = 32.5 Hz), 129.3, 129.1, 128.1, 128.0, 125.1 (q, *J* = 3.7 Hz), 124.6, 122.6 (q, *J* = 4.0 Hz), 81.9, 43.0; <sup>19</sup>F NMR (376 MHz, CDCl<sub>3</sub>) δ -62.6; HRMS (ESI-TOF): Anal. Calcd. For C<sub>16</sub>H<sub>11</sub><sup>79</sup>BrF<sub>3</sub>NNaO<sup>+</sup>: 391.9868, C<sub>16</sub>H<sub>11</sub><sup>81</sup>BrF<sub>3</sub>NNaO<sup>+</sup>: 393.9848, Found: 391.9885, 393.9844; IR (neat, cm<sup>-1</sup>): ν 3062, 3006, 2949, 1324, 1171, 1117, 1072, 905, 895, 837, 802, 701, 661.

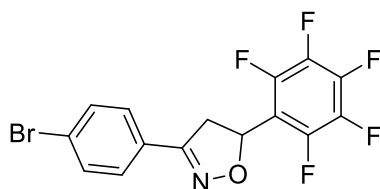

**4as**

**3-(4-Bromophenyl)-5-(perfluorophenyl)-4,5-dihydroisoxazole (4as)**

ethyl acetate/ petroleum ether =1:30; white solid; 53% yield (104.1 mg); mp: 127-128 °C; <sup>1</sup>H NMR (400 MHz, CDCl<sub>3</sub>) δ 7.55 (s, 4H), 6.03 (dd, *J* = 12.0, 8.5 Hz, 1H), 3.78 (dd, *J* = 16.8, 12.0 Hz, 1H), 3.50 (dd, *J* = 16.8, 8.5 Hz, 1H); <sup>13</sup>C NMR (100 MHz, CDCl<sub>3</sub>) δ 154.9, 132.0, 128.2, 127.6, 124.8, 72.4, 40.6; <sup>19</sup>F NMR (376 MHz, CDCl<sub>3</sub>) δ -141.35 – -142.79 (m, 2F), -152.46 – -152.70 (m, 1F), -160.98 – -161.22 (m, 2F); HRMS (ESI-TOF): Anal. Calcd. For C<sub>15</sub>H<sub>7</sub><sup>79</sup>BrF<sub>5</sub>NNaO<sup>+</sup>: 413.9523, C<sub>15</sub>H<sub>7</sub><sup>81</sup>BrF<sub>5</sub>NNaO<sup>+</sup>: 415.9503, Found: 413.9508, 415.9506; IR (neat, cm<sup>-1</sup>): ν 3061, 2977, 2930, 1523, 1503, 1130, 1012, 964, 894, 840, 824.

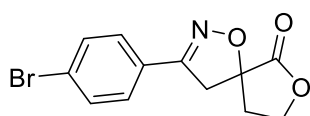

**4at**

**3-(4-Bromophenyl)-1,7-dioxaspiro[4.4]non-2-en-6-one (4at)**

ethyl acetate/ petroleum ether =1:2; white solid; 85% yield (125.6 mg); mp: 147-148 °C; <sup>1</sup>H NMR (400 MHz, DMSO-d<sub>6</sub>) δ 7.68 (d, *J* = 8.3 Hz, 2H), 7.62 (d, *J* = 8.3 Hz, 2H), 4.41 (t, *J* = 6.8 Hz, 2H), 3.76 (d, *J* = 17.6 Hz, 1H), 3.70 (d, *J* = 17.6 Hz, 1H), 2.66 – 2.53 (m, 2H); <sup>13</sup>C NMR (100 MHz, DMSO-d<sub>6</sub>) δ 174.5, 156.0, 132.0, 128.8, 127.6, 124.1, 85.1, 66.1, 41.6, 33.9; HRMS (ESI-TOF): Anal. Calcd. For C<sub>12</sub>H<sub>10</sub><sup>79</sup>BrNNaO<sub>3</sub><sup>+</sup>: 317.9736, C<sub>12</sub>H<sub>10</sub><sup>81</sup>BrNNaO<sub>3</sub><sup>+</sup>: 319.9716, Found: 317.9756, 319.9706; IR (neat, cm<sup>-1</sup>): ν 2942, 2927, 1741, 1592, 1350, 1199, 1008, 892, 821.



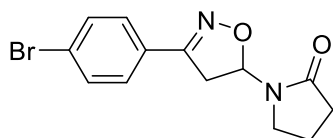

**4au**

**1-(3-(4-Bromophenyl)-4,5-dihydroisoxazol-5-yl)pyrrolidin-2-one (4au)**

ethyl acetate/ petroleum ether =4:1; white solid; 44% yield (68.5 mg); mp: 195-196 °C; <sup>1</sup>H NMR (400 MHz, CDCl<sub>3</sub>) δ 7.53 (s, 4H), 6.63 (dd, *J* = 9.9, 3.5 Hz, 1H), 3.51 (dd, *J* = 17.6, 9.9 Hz, 1H), 3.35 – 3.27 (m, 1H), 3.20 – 3.14 (m, 1H), 3.11 (dd, *J* = 17.6, 3.5 Hz, 1H), 2.42 – 2.36 (m, 2H), 2.08 – 1.92 (m, 2H); <sup>13</sup>C NMR (100 MHz, CDCl<sub>3</sub>) δ 175.3, 154.6, 132.0, 128.1, 127.5, 124.8, 82.2, 41.5, 36.8, 30.9, 17.6; HRMS (ESI-TOF): Anal. Calcd. For C<sub>13</sub>H<sub>13</sub><sup>79</sup>BrN<sub>2</sub>NaO<sub>2</sub><sup>+</sup>: 331.0053, C<sub>13</sub>H<sub>13</sub><sup>81</sup>BrN<sub>2</sub>NaO<sub>2</sub><sup>+</sup>: 333.0032, Found: 331.0036, 333.0051; IR (neat, cm<sup>-1</sup>): ν 2980, 2921, 2890, 1683, 1397, 1283, 1261, 1238, 886, 816, 790.

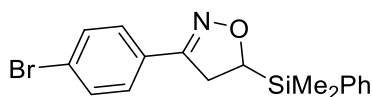

**4av**

**3-(4-Bromophenyl)-5-(dimethyl(phenyl)silyl)-4,5-dihydroisoxazole (4av)**

ethyl acetate/ petroleum ether =1:100; white solid; 77% yield (138.4 mg); mp: 92-93 °C; <sup>1</sup>H NMR (400 MHz, CDCl<sub>3</sub>) δ 7.65 – 7.60 (m, 2H), 7.55 – 7.48 (m, 4H), 7.46 – 7.36 (m, 3H), 4.32 (dd, *J* = 15.6, 11.3 Hz, 1H), 3.39 (dd, *J* = 15.6, 11.3 Hz, 1H), 3.09 (t, *J* = 15.6 Hz, 1H), 0.49 (s, 3H), 0.47 (s, 3H); <sup>13</sup>C NMR (100 MHz, CDCl<sub>3</sub>) δ 155.7, 135.2, 133.9, 131.7, 129.7, 128.5, 128.2, 128.0, 123.9, 74.2, 37.7, -5.1, -5.7; HRMS (ESI-TOF): Anal. Calcd. For C<sub>17</sub>H<sub>18</sub><sup>79</sup>BrNNaOSi<sup>+</sup>: 382.0233, C<sub>17</sub>H<sub>18</sub><sup>81</sup>BrNNaOSi<sup>+</sup>: 384.0213, Found: 382.0235, 384.0212; IR (neat, cm<sup>-1</sup>): ν 3052, 2956, 2902, 1588, 1251, 1115, 896, 821, 779, 736, 697.

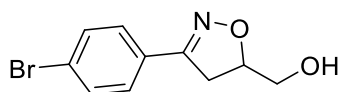

**4aw**

**(3-(4-Bromophenyl)-4,5-dihydroisoxazol-5-yl)methanol (4aw)**

ethyl acetate/ petroleum ether =1:1; white solid; 37% yield (47.4 mg); mp: 116-118 °C; <sup>1</sup>H NMR (400 MHz, CDCl<sub>3</sub>) δ 7.51 (s, 4H), 4.90 – 4.82 (m, 1H), 3.87 (dd, *J* = 12.3, 3.2 Hz, 1H), 3.67 (dd, *J* = 12.3, 4.4 Hz, 1H), 3.34 (dd, *J* = 16.6, 10.7 Hz, 1H), 3.26 (dd, *J* = 16.6, 8.0 Hz, 1H), 2.41 (s, 1H); <sup>13</sup>C NMR (100 MHz, CDCl<sub>3</sub>) δ 156.2, 131.9, 128.2, 128.1, 124.4, 81.5, 63.5, 36.0; HRMS (ESI-TOF): Anal. Calcd. For C<sub>10</sub>H<sub>11</sub><sup>79</sup>BrNO<sup>+</sup>: 255.9968, C<sub>10</sub>H<sub>11</sub><sup>81</sup>BrNO<sup>+</sup>: 257.9947, Found: 255.9970, 257.9933; IR (neat, cm<sup>-1</sup>): ν 3375, 2936, 2922, 2852, 1592, 1399, 1007, 927, 907, 827, 820, 805.

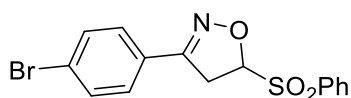

**4ax**

**3-(4-Bromophenyl)-5-(phenylsulfonyl)-4,5-dihydroisoxazole (4ax)**

ethyl acetate/ petroleum ether =1:4; white solid; 53% yield (96.6 mg); mp: >200 °C; <sup>1</sup>H NMR (400 MHz, CDCl<sub>3</sub>) δ 7.99 (d, *J* = 7.5 Hz, 2H), 7.71 – 7.65 (m, 1H), 7.61 – 7.50 (m, 4H), 7.46 (d, *J* = 8.5 Hz, 2H), 5.56 (dd, *J* = 10.9, 4.5 Hz, 1H), 4.02 (dd, *J* = 18.3, 4.5 Hz, 1H), 3.77 (dd, *J* = 18.3, 10.9 Hz, 1H); <sup>13</sup>C NMR (100 MHz, CDCl<sub>3</sub>) δ 156.1, 135.1, 134.6, 132.1, 129.7, 129.2, 128.4, 126.2, 125.5, 93.3, 36.5; HRMS (ESI-TOF): Anal. Calcd. For C<sub>15</sub>H<sub>12</sub><sup>79</sup>BrNNaO<sub>3</sub>S<sup>+</sup>: 387.9613, C<sub>15</sub>H<sub>12</sub><sup>81</sup>BrNNaO<sub>3</sub>S<sup>+</sup>: 389.9593, Found: 387.9625, 389.9600; IR (neat, cm<sup>-1</sup>): ν 3006, 2940, 2895, 1592, 1310, 1089, 1010, 612.

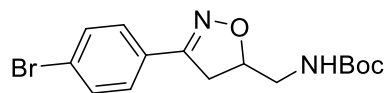

**4ay**

**tert-Butyl ((3-(4-bromophenyl)-4,5-dihydroisoxazol-5-yl)methyl)carbamate (4ay)**

ethyl acetate/ petroleum ether =1:5; white solid; 41% yield (73.2 mg); mp: 123-125 °C; <sup>1</sup>H NMR (400 MHz, CDCl<sub>3</sub>) δ 7.50 (s, 4H), 4.98 (s, 1H), 4.89 – 4.80 (m, 1H), 3.50 – 3.26 (m, 3H), 3.11 (dd, *J* = 16.9, 7.5 Hz, 1H), 1.38 (s, 9H); <sup>13</sup>C NMR (100 MHz, CDCl<sub>3</sub>) δ 156.2, 156.1, 131.9, 128.2, 128.1, 124.4, 80.4, 79.7, 43.5, 37.1, 28.2; HRMS (ESI-TOF): Anal. Calcd. For C<sub>15</sub>H<sub>19</sub><sup>79</sup>BrN<sub>2</sub>NaO<sub>3</sub><sup>+</sup>: 377.0471, C<sub>15</sub>H<sub>19</sub><sup>81</sup>BrN<sub>2</sub>NaO<sub>3</sub><sup>+</sup>: 379.0451, Found: 377.0466, 379.0445; IR (neat, cm<sup>-1</sup>): ν 3374, 2978, 2941, 2872, 1708, 1512, 1492, 1245, 1157, 1009, 917, 885, 819.

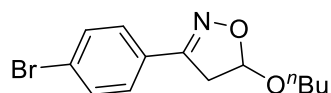

**4az**

**3-(4-Bromophenyl)-5-butoxy-4,5-dihydroisoxazole (4az)**

ethyl acetate/ petroleum ether =1:30; white solid; 54% yield (80.1 mg); mp: 58-59 °C; <sup>1</sup>H NMR (400 MHz, CDCl<sub>3</sub>) δ 7.59 – 7.49 (m, 4H), 5.67 (dd, *J* = 6.7, 1.7 Hz, 1H), 3.85 (dt, *J* = 9.4, 6.6 Hz, 1H), 3.53 (dt, *J* = 9.4, 6.7 Hz, 1H), 3.36 (dd, *J* = 17.3, 6.7 Hz, 1H), 3.16 (dd, *J* = 17.3, 1.7 Hz, 1H), 1.60 – 1.51 (m, 2H), 1.41 – 1.30 (m, 2H), 0.91 (t, *J* = 7.3 Hz, 3H); <sup>13</sup>C NMR (100 MHz, CDCl<sub>3</sub>) δ 156.1, 131.9, 128.22, 128.16, 124.5, 103.4, 68.2, 41.2, 31.5, 19.1, 13.8; HRMS (ESI-TOF): Anal. Calcd. For C<sub>13</sub>H<sub>17</sub><sup>79</sup>BrNO<sub>2</sub><sup>+</sup>: 298.0437, C<sub>13</sub>H<sub>17</sub><sup>81</sup>BrNO<sub>2</sub><sup>+</sup>: 300.0417, Found: 298.0426, 300.0415; IR (neat, cm<sup>-1</sup>): ν 2957, 2930, 2871, 1591, 1350, 1189, 1093, 1071, 1009, 886, 841.

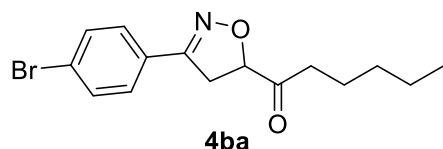

**4ba**

**1-(3-(4-Bromophenyl)-4,5-dihydroisoxazol-5-yl)hexan-1-one (4ba)**

ethyl acetate/ petroleum ether =1:10; white solid; 39% yield (63.2 mg); mp: 68-70 °C; <sup>1</sup>H NMR (400 MHz, CDCl<sub>3</sub>) δ 7.54 (s, 4H), 5.05 (dd, *J* = 11.9, 6.3 Hz, 1H), 3.63 (dd, *J* = 17.0, 6.3 Hz, 1H), 3.45 (dd, *J* = 17.0, 11.9 Hz, 1H), 2.71 (t, *J* = 7.4 Hz, 2H), 1.66 – 1.55 (m, 2H), 1.36 – 1.24 (m, 4H), 0.88 (t, *J* = 6.8 Hz, 3H); <sup>13</sup>C NMR (100 MHz, CDCl<sub>3</sub>) δ 209.2, 155.8, 132.0, 128.3, 124.9, 84.4, 38.9, 36.9, 31.3, 22.7, 22.4, 13.9; HRMS (ESI-TOF): Anal. Calcd. For C<sub>15</sub>H<sub>18</sub><sup>79</sup>BrNNaO<sub>2</sub><sup>+</sup>: 346.0413, C<sub>15</sub>H<sub>18</sub><sup>81</sup>BrNNaO<sub>2</sub><sup>+</sup>: 348.0393, Found: 346.0391, 348.0421; IR (neat, cm<sup>-1</sup>): ν 2949, 2924, 2867, 2855, 1707, 1591, 896, 888, 823.

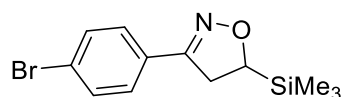

**4ca**

**3-(4-Bromophenyl)-5-(trimethylsilyl)-4,5-dihydroisoxazole (4ca)**

ethyl acetate/ petroleum ether =1:100; white solid; 96% yield (143.4 mg); mp: 77-79 °C; <sup>1</sup>H NMR (400 MHz, CDCl<sub>3</sub>) δ 7.59 – 7.48 (m, 4H), 4.10 (dd, *J* = 15.6, 11.4 Hz, 1H), 3.41 (dd, *J* = 15.6, 11.4 Hz, 1H), 3.06 (t, *J* = 15.6 Hz, 1H), 0.16 (s, 9H); <sup>13</sup>C NMR (100 MHz, CDCl<sub>3</sub>) δ 155.6, 131.8, 128.8, 128.2, 124.0, 74.7, 37.5, -3.9; HRMS (ESI-TOF): Anal. Calcd. For C<sub>12</sub>H<sub>16</sub><sup>79</sup>BrNNaOSi<sup>+</sup>: 320.0077, C<sub>12</sub>H<sub>16</sub><sup>81</sup>BrNNaOSi<sup>+</sup>: 322.0056, Found: 320.0066, 322.0051; IR (neat, cm<sup>-1</sup>): ν 2958, 2924, 1399, 1247, 1195, 1071, 1008, 889, 863, 823.

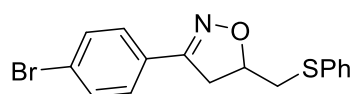

**4da**

**3-(4-Bromophenyl)-5-((phenylthio)methyl)-4,5-dihydroisoxazole (4da)**

ethyl acetate/ petroleum ether =1:30; white solid; 49% yield (85.9 mg); mp: >200 °C; <sup>1</sup>H NMR (400 MHz, CDCl<sub>3</sub>) δ 7.56 – 7.47 (m, 4H), 7.44 – 7.38 (m, 2H), 7.34 – 7.28 (m, 2H), 7.27 – 7.20 (m, 1H), 4.88 (dddd, *J* = 11.0, 8.7, 6.7, 4.5 Hz, 1H), 3.45 – 3.33 (m, 2H), 3.22 (dd, *J* = 16.8, 6.7 Hz, 1H), 2.99 (dd, *J* = 13.6, 8.7 Hz, 1H); <sup>13</sup>C NMR (100 MHz, CDCl<sub>3</sub>) δ 155.4, 134.6, 131.9, 130.1, 129.1, 128.3, 128.1, 126.8, 124.4, 79.8, 39.2, 37.7; HRMS (ESI-TOF): Anal. Calcd. For C<sub>16</sub>H<sub>14</sub><sup>79</sup>BrNNaOS<sup>+</sup>: 369.9872, C<sub>16</sub>H<sub>14</sub><sup>81</sup>BrNNaOS<sup>+</sup>: 371.9851, Found: 369.9858, 371.9852; IR (neat, cm<sup>-1</sup>): ν 3058, 3020, 2924, 1583, 1436, 1071, 1006, 895, 822, 735, 689.

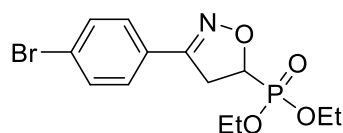

**4ea**

**Diethyl (3-(4-bromophenyl)-4,5-dihydroisoxazol-5-yl)phosphonate (4ea)**

ethyl acetate/ petroleum ether =1:1.5; white solid; 66% yield (119.9 mg); mp: 65-67 °C; <sup>1</sup>H NMR (400 MHz, CDCl<sub>3</sub>) δ 7.51 (s, 4H), 4.89 – 4.82 (m, 1H), 4.27 – 4.15 (m, 4H), 3.68 – 3.52 (m, 2H), 1.33 (t, *J* = 5.8 Hz, 3H), 1.30 (t, *J* = 7.0 Hz, 3H); <sup>13</sup>C NMR (100 MHz, CDCl<sub>3</sub>) δ 155.4 (d, *J* = 6.3 Hz), 131.9, 128.2, 127.4, 124.8, 75.3 (d, *J* = 168.9 Hz), 63.5 (d, *J* = 7.0 Hz), 63.1 (d, *J* = 6.8 Hz), 37.4, 16.4 (d, *J* = 5.6 Hz); HRMS (ESI-TOF): Anal. Calcd. For C<sub>13</sub>H<sub>17</sub><sup>79</sup>BrNNaO<sub>4</sub>P<sup>+</sup>: 383.9971, C<sub>13</sub>H<sub>17</sub><sup>81</sup>BrNNaO<sub>4</sub>P<sup>+</sup>: 385.9950, Found: 383.9956, 385.9958; IR (neat, cm<sup>-1</sup>): ν 2949, 2917, 1617, 1540, 1372, 1311, 1124, 1031, 911, 802, 694.

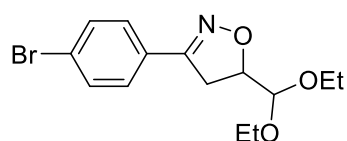

**4fa**

### 3-(4-Bromophenyl)-5-(diethoxymethyl)-4,5-dihydroisoxazole (4fa)

ethyl acetate/ petroleum ether =1:20; white solid; 34% yield (55.9 mg); mp: 64-65 °C; <sup>1</sup>H NMR (400 MHz, CDCl<sub>3</sub>) δ 7.52 (s, 4H), 4.76 (ddd, *J* = 11.1, 7.1, 4.4 Hz, 1H), 4.54 (d, *J* = 4.4 Hz, 1H), 3.82 – 3.69 (m, 2H), 3.69 – 3.56 (m, 2H), 3.39 (dd, *J* = 16.9, 7.1 Hz, 1H), 3.28 (dd, *J* = 16.9, 11.1 Hz, 1H), 1.25 (t, *J* = 7.0 Hz, 3H), 1.16 (t, *J* = 7.0 Hz, 3H); <sup>13</sup>C NMR (100 MHz, CDCl<sub>3</sub>) δ 155.9, 131.8, 128.4, 128.1, 124.2, 102.1, 81.6, 64.5, 63.6, 35.5, 15.3, 15.2; HRMS (ESI-TOF): Anal. Calcd. For C<sub>14</sub>H<sub>18</sub><sup>79</sup>BrNNaO<sub>3</sub><sup>+</sup>: 350.0362, C<sub>14</sub>H<sub>18</sub><sup>81</sup>BrNNaO<sub>3</sub><sup>+</sup>: 352.0342, Found: 350.0352, 352.0329; IR (neat, cm<sup>-1</sup>): ν 2976, 2929, 2882, 1592, 1399, 1349, 1120, 1061, 1009, 899, 823.

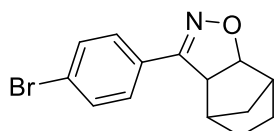

4ga

### 3-(4-bromophenyl)-3a,4,5,6,7,7a-hexahydro-4,7-methanobenzo[d]isoxazole (4ga)

ethyl acetate/ petroleum ether =1:100; white solid; 69% yield (100.9 mg); mp: 97-98 °C; <sup>1</sup>H NMR (400 MHz, CDCl<sub>3</sub>) δ 7.56 (d, *J* = 8.4 Hz, 2H), 7.49 (d, *J* = 8.4 Hz, 2H), 4.62 (d, *J* = 8.3 Hz, 1H), 3.43 (d, *J* = 8.3 Hz, 1H), 2.62 – 2.58 (m, 1H), 2.50 – 2.43 (m, 1H), 1.62 – 1.51 (m, 2H), 1.50 – 1.44 (m, 1H), 1.39 – 1.29 (m, 1H), 1.23 – 1.11 (m, 2H); <sup>13</sup>C NMR (100 MHz, CDCl<sub>3</sub>) δ 156.0, 131.8, 128.3, 128.2, 123.8, 88.1, 56.7, 42.9, 39.1, 32.2, 27.3, 22.6; HRMS (ESI-TOF): Anal. Calcd. For C<sub>14</sub>H<sub>14</sub><sup>79</sup>BrNNaO<sup>+</sup>: 314.0151, C<sub>14</sub>H<sub>14</sub><sup>81</sup>BrNNaO<sup>+</sup>: 316.0131, Found: 314.0153, 316.0113; IR (neat, cm<sup>-1</sup>): ν 2960, 2948, 2872, 1588, 1399, 1068, 1007, 881, 814.

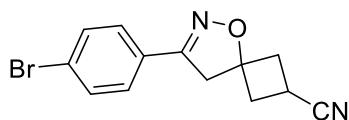

4ha

### 7-(4-Bromophenyl)-5-oxa-6-azaspiro[3.4]oct-6-ene-2-carbonitrile (4ha)

ethyl acetate/ petroleum ether =1:6; white solid; 40% yield (58.3 mg); mp: 135-137 °C; <sup>1</sup>H NMR (400 MHz, CDCl<sub>3</sub>) δ 7.54 (d, *J* = 8.7 Hz, 2H), 7.51 (d, *J* = 8.7 Hz, 2H), 3.54 (s, 2H), 3.23 – 3.12 (m, 1H), 2.99 (dd, *J* = 13.3, 9.8 Hz, 2H), 2.67 (dd, *J* = 13.3, 5.1 Hz, 2H); <sup>13</sup>C NMR (100 MHz, CDCl<sub>3</sub>) δ 156.0, 132.0, 128.0, 127.9, 124.7, 122.1, 84.5, 45.8, 40.8, 15.2; HRMS (ESI-TOF): Anal. Calcd. For C<sub>13</sub>H<sub>11</sub><sup>79</sup>BrN<sub>2</sub>NaO<sup>+</sup>: 312.9947, C<sub>13</sub>H<sub>11</sub><sup>81</sup>BrN<sub>2</sub>NaO<sup>+</sup>: 314.9927, Found: 312.9927, 314.9941; IR (neat, cm<sup>-1</sup>): ν 2976, 2923, 2875, 2852, 2239, 1699, 1400, 1363, 1160, 1084, 1008, 894, 819.

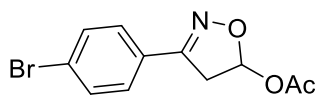

4ia

### 3-(4-Bromophenyl)-4,5-dihydroisoxazol-5-yl acetate (4ia)

ethyl acetate/ petroleum ether =1:4; white solid; 38% yield (54.0 mg); mp: 78-80 °C; <sup>1</sup>H NMR (400 MHz, CDCl<sub>3</sub>) δ 7.55 (s, 4H), 6.82 (dd, *J* = 6.9, 1.4 Hz, 1H), 3.58 (dd, *J* = 17.8, 6.9 Hz, 1H), 3.31 (dd, *J* = 17.8, 1.4 Hz, 1H), 2.07 (s, 3H); <sup>13</sup>C NMR (100 MHz, CDCl<sub>3</sub>) δ 169.6, 156.1, 132.1, 128.4, 127.2, 125.2, 95.9,

41.0, 21.0; HRMS (ESI-TOF): Anal. Calcd. For  $C_{11}H_{10}^{79}BrNNaO_3^+$ : 305.9736,  $C_{11}H_{10}^{81}BrNNaO_3^+$ : 307.9716, Found: 305.9746, 307.9719; IR (neat,  $cm^{-1}$ ):  $\nu$  2956, 2919, 2851, 1750, 1363, 1218, 1172, 1063, 1029, 949, 845, 818.

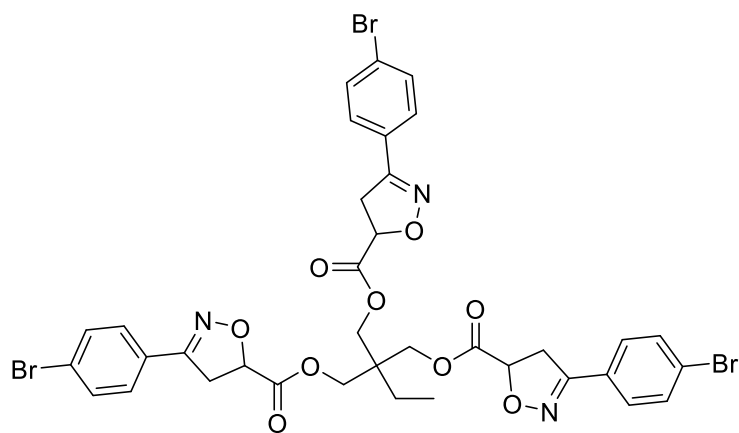

**4ja**

**2-(((3-(4-Bromophenyl)-4,5-dihydroisoxazole-5-carbonyloxy)methyl)-2-ethylpropane-1,3-diyl bis(3-(4-bromophenyl)-4,5-dihydroisoxazole-5-carboxylate) (4ja)**

ethyl acetate/ petroleum ether =1:1; white solid; 33% yield ( 149.0 mg); mp: 146-148 °C;  $^1H$  NMR (400 MHz,  $CDCl_3$ )  $\delta$  7.54 – 7.41 (m, 12H), 5.20 – 5.06 (m, 3H), 4.23 – 4.09 (m, 6H), 3.66 – 3.47 (m, 6H), 1.51 (q,  $J$  = 7.3 Hz, 2H), 0.87 (t,  $J$  = 7.3 Hz, 3H);  $^{13}C$  NMR (100 MHz,  $CDCl_3$ )  $\delta$  169.4, 155.3, 131.9, 128.2, 127.2, 124.8, 78.0, 64.9, 41.1, 38.3, 23.1, 7.2; HRMS (ESI-TOF): Anal. Calcd. For  $C_{36}H_{32}^{79}Br^{79}Br^{81}BrN_3NaO_9^+$ : 911.9560,  $C_{36}H_{32}^{79}Br^{81}Br^{81}BrN_3NaO_9^+$ : 913.9540, Found: 911.9585, 913.9638; IR (neat,  $cm^{-1}$ ):  $\nu$  2965, 2926, 1740, 1591, 1347, 1193, 1161, 1008, 891, 864, 820.

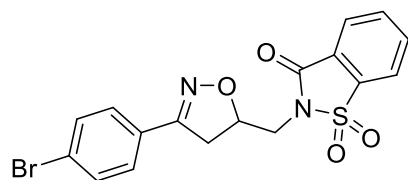

**4ka**

**2-((3-(4-Bromophenyl)-4,5-dihydroisoxazol-5-yl)methyl)benzo[d]isothiazol-3(2H)-one 1,1-dioxide (4ka)**

ethyl acetate/ petroleum ether =1:2; white solid; 44% yield (92.6 mg); mp: 153-154 °C;  $^1H$  NMR (400 MHz,  $DMSO-d_6$ )  $\delta$  8.32 (d,  $J$  = 7.6 Hz, 1H), 8.12 (d,  $J$  = 7.5 Hz, 1H), 8.09 – 8.04 (m, 1H), 8.03 – 7.97 (m, 1H), 7.65 (d,  $J$  = 8.6 Hz, 2H), 7.60 (d,  $J$  = 8.6 Hz, 2H), 5.16 – 5.06 (m, 1H), 4.01 (dd,  $J$  = 15.2, 7.4 Hz, 1H), 3.88 (dd,  $J$  = 15.2, 4.8 Hz, 1H), 3.60 (dd,  $J$  = 17.2, 10.6 Hz, 1H), 3.39 – 3.31 (m, 1H);  $^{13}C$  NMR (100 MHz,  $DMSO-d_6$ )  $\delta$  159.0, 156.2, 136.7, 136.0, 135.4, 131.9, 128.7, 128.4, 126.2, 125.3, 123.6, 121.7, 77.8, 41.7, 37.9; HRMS (ESI-TOF): Anal. Calcd. For  $C_{17}H_{13}^{79}BrN_2NaO_4S^+$ : 442.9672,  $C_{17}H_{13}^{81}BrN_2NaO_4S^+$ : 444.9651, Found: 442.9660, 444.9621; IR (neat,  $cm^{-1}$ ):  $\nu$  3088, 3027, 1732, 1326, 1265, 1179, 1160, 906, 869, 816, 754, 676.

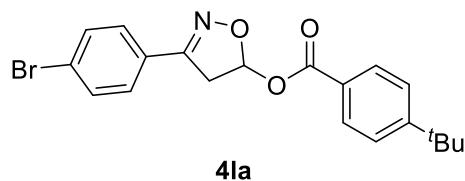

**3-(4-Bromophenyl)-4,5-dihydroisoxazol-5-yl 4-(tert-butyl)benzoate (41a)**

ethyl acetate/ petroleum ether =1:8; white solid; 47% yield (95.2 mg); mp: 130-131 °C; <sup>1</sup>H NMR (400 MHz, CDCl<sub>3</sub>) δ 7.95 (d, *J* = 8.4 Hz, 2H), 7.63 – 7.56 (m, 4H), 7.43 (d, *J* = 8.4 Hz, 2H), 7.08 (d, *J* = 6.8 Hz, 1H), 3.70 (dd, *J* = 17.7, 6.8 Hz, 1H), 3.47 (d, *J* = 17.7 Hz, 1H), 1.32 (s, 9H); <sup>13</sup>C NMR (100 MHz, CDCl<sub>3</sub>) δ 165.2, 157.5, 156.2, 132.2, 129.8, 128.5, 127.3, 126.2, 125.4, 125.2, 96.7, 41.4, 35.1, 31.0; HRMS (EI-TOF): Anal. Calcd. For C<sub>20</sub>H<sub>20</sub><sup>79</sup>BrNO<sub>3</sub>: 401.0627, C<sub>20</sub>H<sub>20</sub><sup>81</sup>BrNO<sub>3</sub>: 403.0606, Found: 401.0621, 403.0600; IR (neat, cm<sup>-1</sup>): ν 2964, 2924, 2871, 1723, 1265, 1087, 1073, 1009, 948, 845, 821, 773, 706.

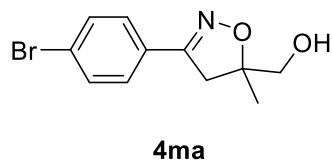

**(3-(4-Bromophenyl)-5-methyl-4,5-dihydroisoxazol-5-yl)methanol (4ma)**

ethyl acetate/ petroleum ether =1:3; colorless liquid; 42% yield (56.6 mg); <sup>1</sup>H NMR (400 MHz, CDCl<sub>3</sub>) δ 7.54 – 7.47 (m, 4H), 3.74 (d, *J* = 12.0 Hz, 1H), 3.57 (d, *J* = 12.0 Hz, 1H), 3.47 (d, *J* = 16.6 Hz, 1H), 2.97 (d, *J* = 16.6 Hz, 1H), 2.36 (s, 1H), 1.42 (s, 3H); <sup>13</sup>C NMR (100 MHz, CDCl<sub>3</sub>) δ 156.1, 131.8, 128.7, 128.0, 124.2, 87.9, 67.2, 41.7, 22.6; HRMS (ESI-TOF): Anal. Calcd. For C<sub>11</sub>H<sub>12</sub><sup>79</sup>BrNNaO<sub>2</sub><sup>+</sup>: 291.9944, C<sub>11</sub>H<sub>12</sub><sup>81</sup>BrNNaO<sub>2</sub><sup>+</sup>: 293.9923, Found: 291.9952, 293.9929; IR (neat, cm<sup>-1</sup>): ν 3396, 2975, 2928, 2869, 1591, 1490, 1399, 1354, 1055, 1009, 909, 821, 795.

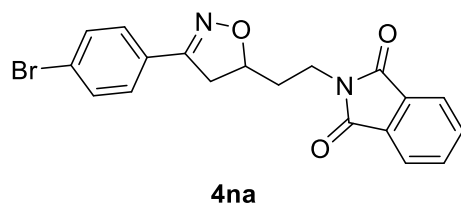

**2-(2-(3-(4-Bromophenyl)-4,5-dihydroisoxazol-5-yl)ethyl)isoindoline-1,3-dione (4na)**

ethyl acetate/ petroleum ether =1:4; white solid; 40% yield (79.7 mg); mp: 149-151 °C; <sup>1</sup>H NMR (400 MHz, CDCl<sub>3</sub>) δ 7.84 – 7.79 (m, 2H), 7.73 – 7.66 (m, 2H), 7.48 (s, 4H), 4.83 – 4.74 (m, 1H), 3.93 – 3.77 (m, 2H), 3.45 (dd, *J* = 16.6, 10.5 Hz, 1H), 3.01 (dd, *J* = 16.6, 8.1 Hz, 1H), 2.24 – 2.13 (m, 1H), 2.04 – 1.95 (m, 1H); <sup>13</sup>C NMR (100 MHz, CDCl<sub>3</sub>) δ 168.1, 155.4, 133.9, 131.9, 131.8, 128.4, 128.0, 124.2, 123.2, 79.4, 39.9, 34.7, 33.9; HRMS (ESI-TOF): Anal. Calcd. For C<sub>19</sub>H<sub>15</sub><sup>79</sup>BrN<sub>2</sub>NaO<sub>3</sub><sup>+</sup>: 421.0158, C<sub>19</sub>H<sub>15</sub><sup>81</sup>BrN<sub>2</sub>NaO<sub>3</sub><sup>+</sup>: 423.0138, Found: 421.0133, 423.0146; IR (neat, cm<sup>-1</sup>): ν 3066, 2930, 2847, 1703, 1395, 1007, 906, 814, 716, 706.

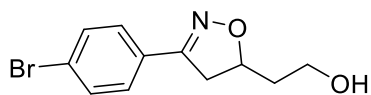

**40a**

**2-(3-(4-Bromophenyl)-4,5-dihydroisoxazol-5-yl)ethan-1-ol (40a)**

ethyl acetate/ petroleum ether =1:1; white solid; 36% yield (49.5 mg); mp: 99-101 °C; <sup>1</sup>H NMR (400 MHz, CDCl<sub>3</sub>) δ 7.51 (s, 4H), 4.97 – 4.88 (m, 1H), 3.84 (t, *J* = 5.9 Hz, 2H), 3.43 (dd, *J* = 16.5, 10.4 Hz, 1H), 3.03 (dd, *J* = 16.5, 8.0 Hz, 1H), 2.22 (s, 1H), 2.08 – 1.85 (m, 2H); <sup>13</sup>C NMR (100 MHz, CDCl<sub>3</sub>) δ 156.0, 131.9, 128.4, 128.0, 124.3, 79.6, 59.6, 40.2, 37.7; HRMS (ESI-TOF): Anal. Calcd. For C<sub>11</sub>H<sub>12</sub><sup>79</sup>BrNNaO<sub>2</sub><sup>+</sup>: 291.9944, C<sub>11</sub>H<sub>12</sub><sup>81</sup>BrNNaO<sub>2</sub><sup>+</sup>: 293.9923, Found: 291.9949, 293.9922; IR (neat, cm<sup>-1</sup>): ν 3293, 2937, 2880, 1591, 1399, 1348, 1041, 1033, 899, 824, 795.

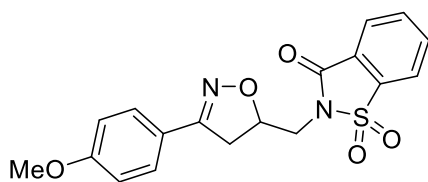

**5**

**2-((3-(4-Methoxyphenyl)-4,5-dihydroisoxazol-5-yl)methyl)benzo[d]isothiazol-3(2H)-one 1,1-dioxide (5)**

ethyl acetate/ petroleum ether =1:1.5; light yellow solid; 60% yield (111.7 mg); mp: 147-148 °C; <sup>1</sup>H NMR (400 MHz, DMSO-d<sub>6</sub>) δ 8.32 (d, *J* = 7.6 Hz, 1H), 8.16 – 7.95 (m, 3H), 7.60 (d, *J* = 8.8 Hz, 2H), 7.00 (d, *J* = 8.8 Hz, 2H), 5.10 – 5.01 (m, 1H), 3.97 (dd, *J* = 15.1, 7.4 Hz, 1H), 3.89 – 3.76 (m, 4H), 3.56 (dd, *J* = 17.1, 10.5 Hz, 1H), 3.37 – 3.29 (m, 1H); <sup>13</sup>C NMR (100 MHz, DMSO-d<sub>6</sub>) δ 160.8, 159.0, 156.2, 136.8, 136.0, 135.4, 128.3, 126.3, 125.3, 121.7, 121.6, 114.3, 77.1, 55.4, 41.7, 38.3; HRMS (ESI-TOF): Anal. Calcd. For C<sub>18</sub>H<sub>17</sub>N<sub>2</sub>O<sub>5</sub>S<sup>+</sup>: 373.0853, Found: 373.0859; IR (neat, cm<sup>-1</sup>): ν 3069, 2963, 2920, 2848, 1739, 1321, 1300, 1248, 1178, 1162, 1018, 839, 747, 671.

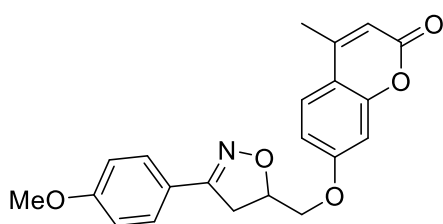

**6**

**7-((3-(4-Methoxyphenyl)-4,5-dihydroisoxazol-5-yl)methoxy)-4-methyl-2H-chromen-2-one (6)**

ethyl acetate/ petroleum ether =1:1; light yellow solid; 52% yield (94.8 mg); mp: 141-143 °C; <sup>1</sup>H NMR (400 MHz, CDCl<sub>3</sub>) δ 7.60 (d, *J* = 8.8 Hz, 2H), 7.45 (d, *J* = 8.8 Hz, 1H), 6.89 (d, *J* = 8.8 Hz, 2H), 6.84 (dd, *J* = 8.8, 2.5 Hz, 1H), 6.76 (d, *J* = 2.5 Hz, 1H), 6.08 (s, 1H), 5.12 – 5.04 (m, 1H), 4.17 (dd, *J* = 10.0, 5.3 Hz, 1H), 4.11 (dd, *J* = 10.0, 4.9 Hz, 1H), 3.81 (s, 3H), 3.50 (dd, *J* = 16.7, 10.7 Hz, 1H), 3.32 (dd, *J* = 16.7, 7.0 Hz, 1H), 2.35 (s, 3H); <sup>13</sup>C NMR (100 MHz, CDCl<sub>3</sub>) δ 161.2, 161.1, 161.0, 155.9, 154.9, 152.4, 128.2, 125.5, 121.5, 114.0, 113.9, 112.3, 112.1, 101.6, 78.1, 69.0, 55.3, 37.6, 18.5; HRMS (ESI-TOF): Anal. Calcd. For C<sub>21</sub>H<sub>20</sub>NO<sub>5</sub><sup>+</sup>: 366.1336, Found: 366.1354; IR (neat, cm<sup>-1</sup>): ν 2961, 2932, 1731, 1607, 1251, 1155, 1071, 891, 827.

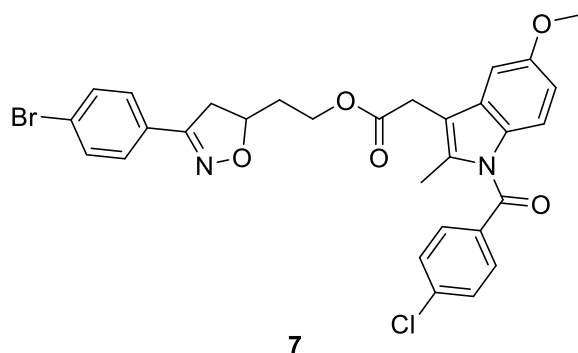

7

**2-(3-(4-Bromophenyl)-4,5-dihydroisoxazol-5-yl)ethyl 2-(1-(4-chlorobenzoyl)-5-methoxy-2-methyl-1H-indol-3-yl)acetate (7)**

ethyl acetate/ petroleum ether =1:3; yellow solid; 45% yield (137.8 mg); mp: 81-83 °C; <sup>1</sup>H NMR (400 MHz, CDCl<sub>3</sub>) δ 7.63 (d, *J* = 8.3 Hz, 2H), 7.49 (d, *J* = 8.3 Hz, 2H), 7.46 – 7.41 (m, 4H), 6.96 (d, *J* = 2.4 Hz, 1H), 6.87 (d, *J* = 9.0 Hz, 1H), 6.66 (dd, *J* = 9.0, 2.4 Hz, 1H), 4.76 – 4.67 (m, 1H), 4.34 – 4.22 (m, 2H), 3.81 (s, 3H), 3.67 (s, 2H), 3.26 (dd, *J* = 16.5, 10.4 Hz, 1H), 2.88 (dd, *J* = 16.5, 8.0 Hz, 1H), 2.37 (s, 3H), 2.14 – 2.01 (m, 1H), 2.01 – 1.88 (m, 1H); <sup>13</sup>C NMR (100 MHz, CDCl<sub>3</sub>) δ 170.6, 168.1, 155.9, 155.6, 139.2, 135.8, 133.7, 131.8, 131.0, 130.7, 130.5, 129.0, 128.3, 127.9, 124.2, 114.9, 112.3, 111.4, 101.2, 78.4, 61.5, 55.6, 39.7, 34.1, 30.2, 13.3; HRMS (EI-TOF): Anal. Calcd. For C<sub>30</sub>H<sub>26</sub><sup>79</sup>BrClN<sub>2</sub>O<sub>5</sub>: 608.0714, C<sub>30</sub>H<sub>26</sub><sup>81</sup>BrClN<sub>2</sub>O<sub>5</sub>: 610.0693, Found: 608.0717, 610.0674; IR (neat, cm<sup>-1</sup>): ν 2978, 2957, 2929, 2832, 1733, 1679, 1591, 1477, 1355, 1315, 1219, 1068, 826, 751.

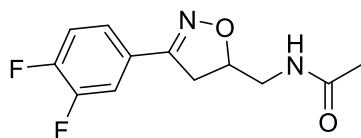

8

**N-((3-(3,4-Difluorophenyl)-4,5-dihydroisoxazol-5-yl)methyl)acetamide (8)**

ethyl acetate/ petroleum ether =7:1; light yellow solid; 36% yield (46.1 mg); mp: 121-122 °C; <sup>1</sup>H NMR (400 MHz, CDCl<sub>3</sub>) δ 7.57 – 7.45 (m, 1H), 7.34 – 7.28 (m, 1H), 7.21 – 7.13 (m, 1H), 6.14 (s, 1H), 4.91 – 4.83 (m, 1H), 3.63 – 3.46 (m, 2H), 3.34 (dd, *J* = 16.9, 10.7 Hz, 1H), 3.07 (dd, *J* = 16.9, 7.5 Hz, 1H), 1.97 (s, 3H); <sup>13</sup>C NMR (100 MHz, CDCl<sub>3</sub>) δ 170.8, 155.4, 151.5 (dd, *J* = 253.5, 12.6 Hz), 150.3 (dd, *J* = 249.8, 13.2 Hz), 126.2 (dd, *J* = 6.3, 4.0 Hz), 123.2 (dd, *J* = 6.7, 3.7 Hz), 117.7 (d, *J* = 17.9 Hz), 115.6 (d, *J* = 18.8 Hz), 80.3, 42.2, 37.3, 23.1; <sup>19</sup>F NMR (376 MHz, CDCl<sub>3</sub>) δ -134.0 (d, *J* = 22.0 Hz, 1F), -136.2 (d, *J* = 22.0 Hz, 1F); HRMS (ESI-TOF): Anal. Calcd. For C<sub>12</sub>H<sub>12</sub>F<sub>2</sub>N<sub>2</sub>NaO<sub>2</sub><sup>+</sup>: 277.0759, Found: 277.0756; IR (neat, cm<sup>-1</sup>): ν 3294, 2988, 2942, 2926, 1738, 1651, 1225, 1192, 1026, 1009, 822.

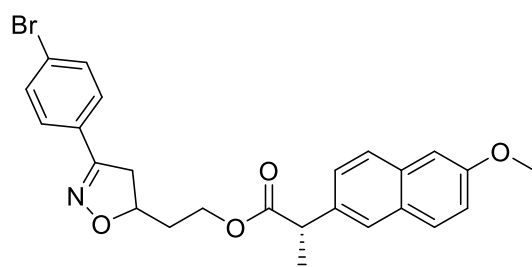

9



**2-(3-(4-Bromophenyl)-4,5-dihydroisoxazol-5-yl)ethyl**  
**yl)propanoate (9)**

**(2S)-2-(6-methoxynaphthalen-2-**

ethyl acetate/ petroleum ether =1:5; white solid; 46% yield (110.6 mg); mp: 113-115 °C; <sup>1</sup>H NMR (400 MHz, CDCl<sub>3</sub>) δ 7.81 – 7.71 (m, 3H), 7.54 – 7.42 (m, 3H), 7.40 – 7.31 (m, 2H), 7.25 – 7.19 (m, 1H), 7.18 – 7.13 (m, 1H), 4.75 – 4.61 (m, 1H), 4.43 – 4.23 (m, 2H), 4.01 – 3.85 (m, 4H), 3.14 – 3.03 (m, 1H), 2.84 – 2.73 (m, 1H), 2.19 – 2.05 (m, 1H), 2.03 – 1.89 (m, 1H), 1.68 – 1.62 (m, 3H); <sup>13</sup>C NMR (100 MHz, CDCl<sub>3</sub>) δ 174.4, 174.3, 157.61, 157.59, 155.66, 155.64, 135.54, 135.49, 133.6, 131.7, 129.13, 129.12, 128.78, 128.77, 128.31, 128.28, 127.84, 127.83, 127.15, 127.12, 126.1, 126.0, 125.9, 125.8, 124.07, 124.06, 119.06, 119.04, 105.54, 105.50, 78.9, 78.6, 61.3, 61.2, 55.20, 55.19, 45.4, 45.3, 39.53, 39.50, 33.89, 33.87, 18.5, 18.3; HRMS (EI-TOF): Anal. Calcd. For C<sub>25</sub>H<sub>24</sub><sup>79</sup>BrNO<sub>4</sub>: 481.0889, C<sub>25</sub>H<sub>24</sub><sup>81</sup>BrNO<sub>4</sub>: 483.0868, Found: 481.0893, 483.0891; IR (neat, cm<sup>-1</sup>): ν 2960, 2937, 1728, 1604, 1176, 1159, 1026, 858, 823, 813.

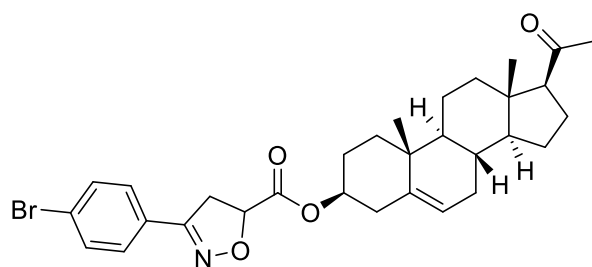

**10**

**(3S,8S,9S,10R,13S,14S,17S)-17-Acetyl-10,13-dimethyl-2,3,4,7,8,9,10,11,12,13,14,15,16,17-**  
**tetradecahydro-1H-cyclopenta[a]phenanthren-3-yl 3-(4-bromophenyl)-4,5-dihydroisoxazole-5-**  
**carboxylate (10)**

ethyl acetate/ petroleum ether =1:5; white solid; 62% yield (176.5 mg); mp: 180-182 °C; <sup>1</sup>H NMR (400 MHz, CDCl<sub>3</sub>) δ 7.48 (s, 4H), 5.35 – 5.30 (m, 1H), 5.10 (t, *J* = 9.3 Hz, 1H), 4.71 – 4.60 (m, 1H), 3.56 (d, *J* = 9.3 Hz, 2H), 2.48 (t, *J* = 8.7 Hz, 1H), 2.36 – 2.29 (m, 2H), 2.25 – 1.84 (m, 8H), 1.68 – 1.51 (m, 5H), 1.46 – 1.38 (m, 3H), 1.20 – 1.08 (m, 3H), 1.00 – 0.92 (m, 4H), 0.57 (s, 3H); <sup>13</sup>C NMR (100 MHz, CDCl<sub>3</sub>) δ 209.2, 169.1, 155.0, 139.0, 131.8, 128.2, 127.4, 124.5, 122.5, 78.2, 75.5, 63.4, 56.6, 49.6, 43.7, 38.5, 38.4, 37.64, 37.60, 36.7, 36.4, 31.6, 31.3, 27.3, 24.3, 22.6, 20.8, 19.1, 13.0; IR (neat, cm<sup>-1</sup>): ν 2943, 2931, 2853, 1733, 1702, 1508, 1214, 1169, 1155, 1010, 904, 832.

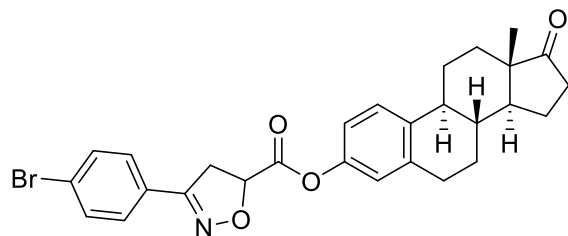

**11**

**(8R,9S,13S,14S)-13-Methyl-17-oxo-7,8,9,11,12,13,14,15,16,17-decahydro-6H-**  
**cyclopenta[a]phenanthren-3-yl 3-(4-bromophenyl)-4,5-dihydroisoxazole-5-carboxylate (11)**

ethyl acetate/ petroleum ether =1:3; light yellow solid; 71% yield (185.0 mg); mp: 161-162 °C; <sup>1</sup>H NMR (400 MHz, CDCl<sub>3</sub>) δ 7.57 – 7.50 (m, 4H), 7.28 (s, 1H), 6.95 – 6.81 (m, 2H), 5.39 (dd, *J* = 11.2, 7.2 Hz,

1H), 3.83 – 3.63 (m, 2H), 2.92 – 2.84 (m, 2H), 2.54 – 2.45 (m, 1H), 2.41 – 2.34 (m, 1H), 2.29 – 2.20 (m, 1H), 2.17 – 1.94 (m, 4H), 1.66 – 1.42 (m, 6H), 0.89 (s, 3H); <sup>13</sup>C NMR (100 MHz, CDCl<sub>3</sub>) δ 220.5, 168.5, 155.1, 147.9, 138.0, 137.8, 131.8, 128.2, 127.2, 126.3, 124.7, 120.9, 118.1, 78.1, 50.1, 47.7, 43.9, 38.5, 37.7, 35.6, 31.3, 29.1, 26.0, 25.5, 21.4, 13.6; HRMS (ESI-TOF): Anal. Calcd. For C<sub>28</sub>H<sub>29</sub><sup>79</sup>BrNO<sub>4</sub><sup>+</sup>: 522.1274, C<sub>28</sub>H<sub>29</sub><sup>81</sup>BrNO<sub>4</sub><sup>+</sup>: 524.1254, Found: 522.1256, 524.1250; IR (neat, cm<sup>-1</sup>): ν 2930, 2876, 2854, 2820, 1766, 1744, 1220, 1189, 1176, 1002, 886, 817.

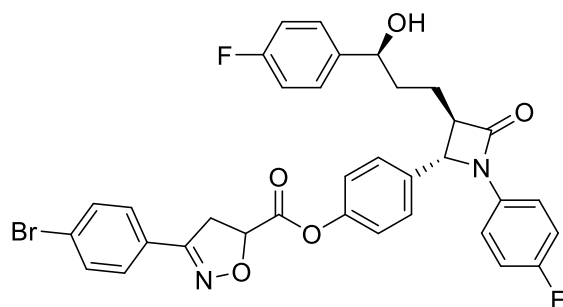

12

**4-((2S,3R)-1-(4-Fluorophenyl)-3-((S)-3-(4-fluorophenyl)-3-hydroxypropyl)-4-oxoazetidin-2-yl)phenyl 3-(4-bromophenyl)-4,5-dihydroisoxazole-5-carboxylate (12)**

ethyl acetate/ petroleum ether =1:2; yellow solid; 46% yield (122.0 mg); mp: 70-71 °C; <sup>1</sup>H NMR (400 MHz, CDCl<sub>3</sub>) δ 7.54 (s, 4H), 7.32 (d, *J* = 8.3 Hz, 2H), 7.27 – 7.24 (m, 2H), 7.21 – 7.12 (m, 4H), 7.00 – 6.94 (m, 2H), 6.93 – 6.87 (m, 2H), 5.39 (dd, *J* = 10.9, 7.3 Hz, 1H), 4.68 (t, *J* = 6.0 Hz, 1H), 4.62 (d, *J* = 2.3 Hz, 1H), 3.80 – 3.67 (m, 2H), 3.14 – 2.93 (m, 2H), 1.99 – 1.84 (m, 4H); <sup>13</sup>C NMR (100 MHz, CDCl<sub>3</sub>) δ 168.2, 167.2, 162.0 (d, *J* = 245.5 Hz), 158.9 (d, *J* = 243.6 Hz), 155.3, 150.2, 139.9 (d, *J* = 3.1 Hz), 135.6, 133.5 (d, *J* = 2.8 Hz), 132.0, 128.3, 127.3 (d, *J* = 8.0 Hz), 127.1, 127.0, 125.0, 122.0, 118.3 (d, *J* = 7.8 Hz), 115.8 (d, *J* = 22.7 Hz), 115.2 (d, *J* = 21.3 Hz), 78.1, 72.9, 60.6, 60.2, 38.6, 36.4, 24.9; <sup>19</sup>F NMR (376 MHz, CDCl<sub>3</sub>) δ -114.9, -117.5; IR (neat, cm<sup>-1</sup>): ν 3418, 3063, 2926, 2855, 1740, 1507, 1216, 1198, 1169, 1154, 831, 729.

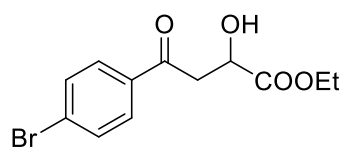

13

**Ethyl 4-(4-bromophenyl)-2-hydroxy-4-oxobutanoate (13)**

ethyl acetate/ petroleum ether =1:3; yellow solid; 59% yield (53.5 mg); mp: 64-65 °C; <sup>1</sup>H NMR (400 MHz, CDCl<sub>3</sub>) δ 7.80 (d, *J* = 8.6 Hz, 2H), 7.61 (d, *J* = 8.6 Hz, 2H), 4.64 (dd, *J* = 6.0, 3.9 Hz, 1H), 4.26 (q, *J* = 7.1 Hz, 2H), 3.49 (dd, *J* = 17.4, 3.9 Hz, 1H), 3.40 (dd, *J* = 17.4, 6.0 Hz, 1H), 1.27 (t, *J* = 7.1 Hz, 3H); <sup>13</sup>C NMR (100 MHz, CDCl<sub>3</sub>) δ 196.4, 173.6, 135.1, 132.0, 129.6, 128.8, 67.1, 61.9, 42.1, 14.1; HRMS (ESI-TOF): Anal. Calcd. For C<sub>12</sub>H<sub>13</sub><sup>79</sup>BrNaO<sub>4</sub><sup>+</sup>: 322.9889, C<sub>12</sub>H<sub>13</sub><sup>81</sup>BrNaO<sub>4</sub><sup>+</sup>: 324.9869, Found: 324.9883, 324.9874; IR (neat, cm<sup>-1</sup>): ν 3430, 2987, 2924, 2854, 1737, 1681, 1585, 1216, 1193, 1175, 1039, 1012, 813.

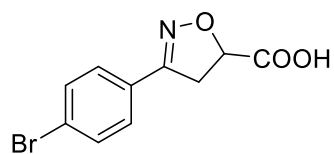

**14**

**3-(4-Bromophenyl)-4,5-dihydroisoxazole-5-carboxylic acid (14)**

ethyl acetate; white solid; 90% yield (48.7 mg); mp: 192-193 °C; <sup>1</sup>H NMR (400 MHz, DMSO-d<sub>6</sub>) δ 7.67 (d, *J* = 8.9 Hz, 2H), 7.63 (d, *J* = 8.9 Hz, 2H), 5.18 (dd, *J* = 11.8, 6.9 Hz, 1H), 3.72 (dd, *J* = 17.3, 11.8 Hz, 1H), 3.57 (dd, *J* = 17.3, 6.9 Hz, 1H); <sup>13</sup>C NMR (100 MHz, DMSO-d<sub>6</sub>) δ 171.6, 155.6, 132.0, 128.8, 127.9, 123.8, 78.1, 38.3; HRMS (ESI-TOF): Anal. Calcd. For C<sub>10</sub>H<sub>8</sub><sup>79</sup>BrNNaO<sub>3</sub><sup>+</sup>: 291.9580, C<sub>10</sub>H<sub>8</sub><sup>81</sup>BrNNaO<sub>3</sub><sup>+</sup>: 293.9559, Found: 291.9596, 293.9528; IR (neat, cm<sup>-1</sup>): ν 3043, 2977, 2918, 2853, 1715, 1591, 1401, 1222, 894, 871, 837, 822.

# Spectroscopic data for substrates and products

Nov19-2020-H400ML14-88-3.10.1.1r

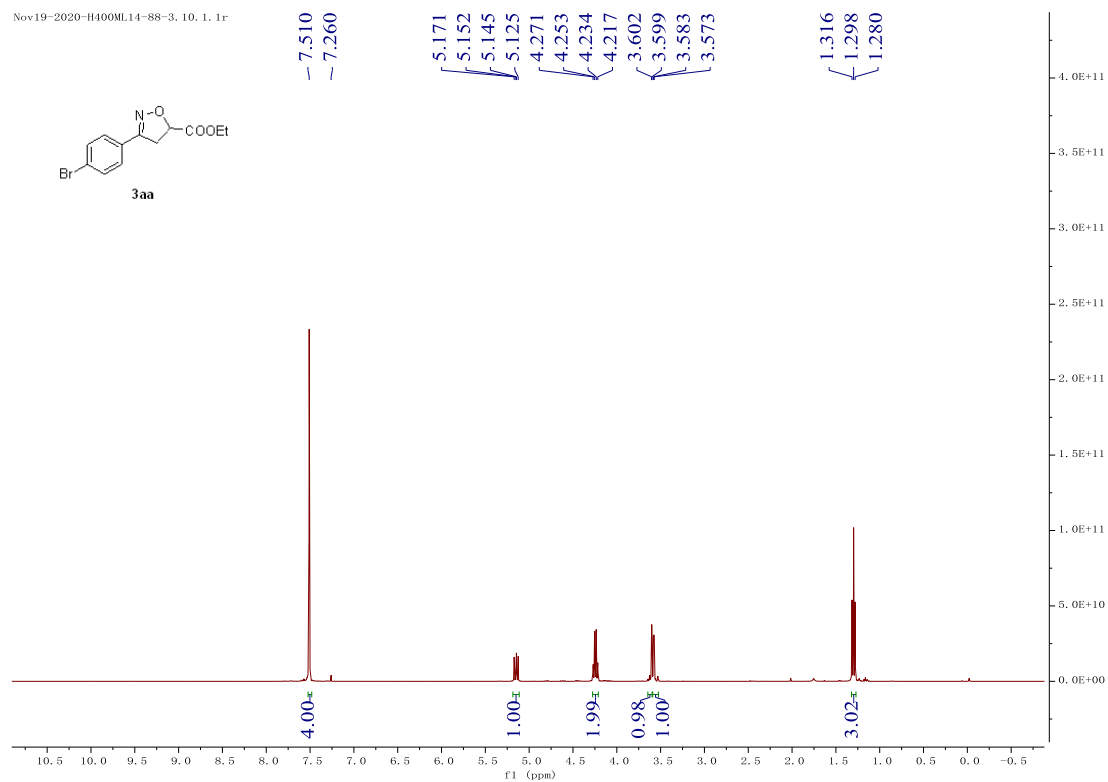

Nov19-2020-C400ML14-88-3.12.1.1r

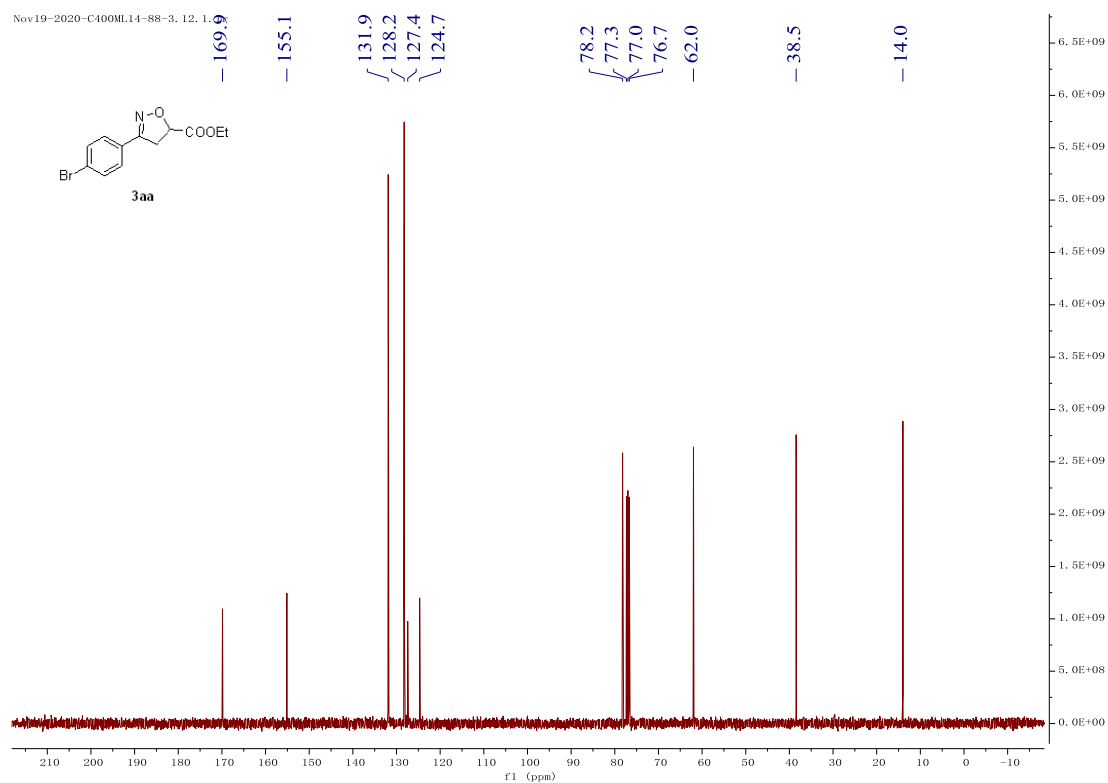

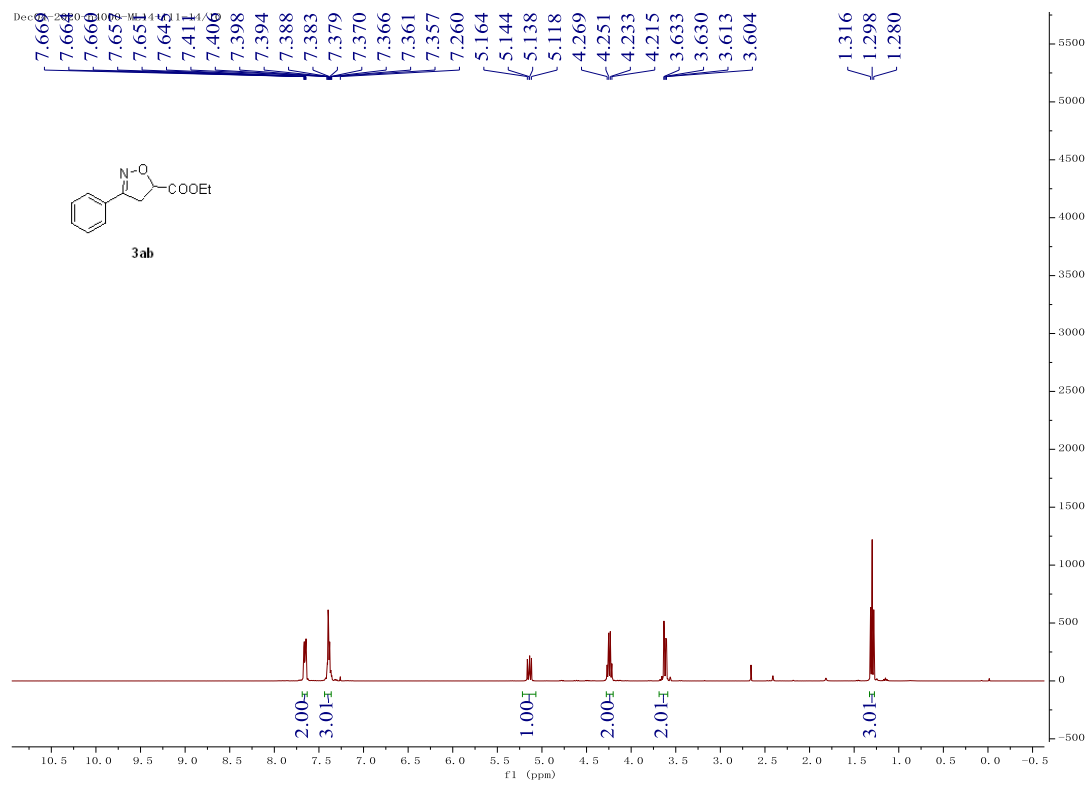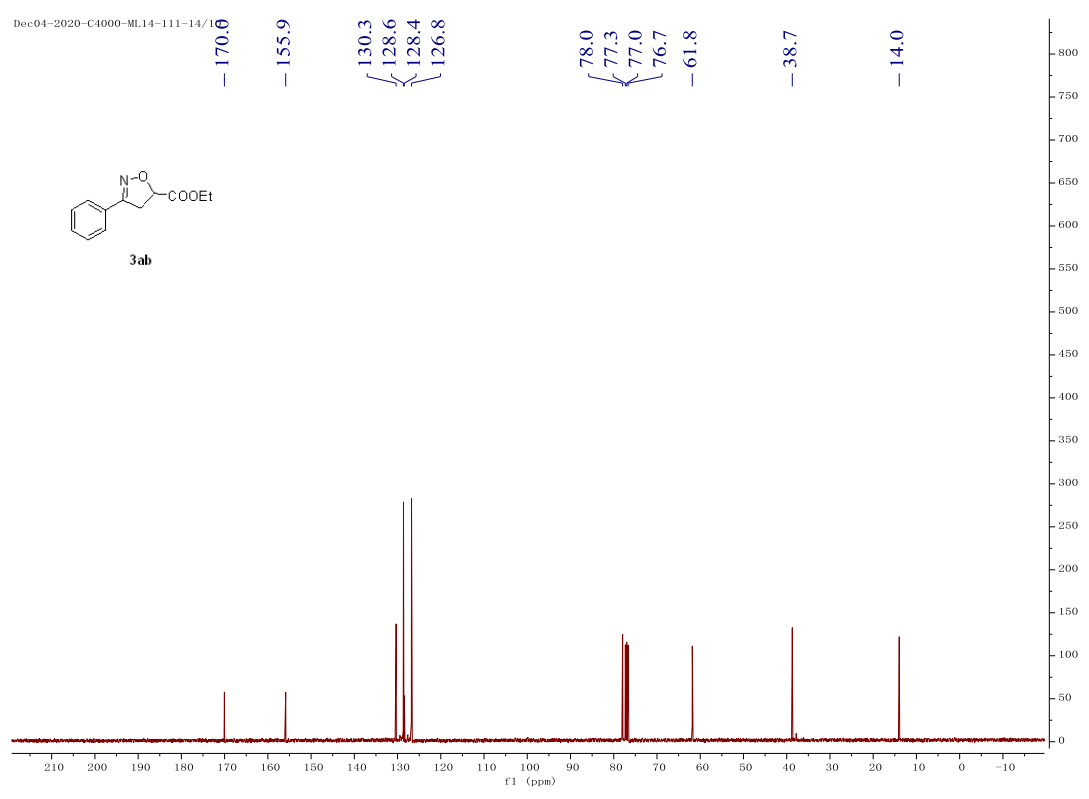

Dec16-2020-h400m114-121-1/10

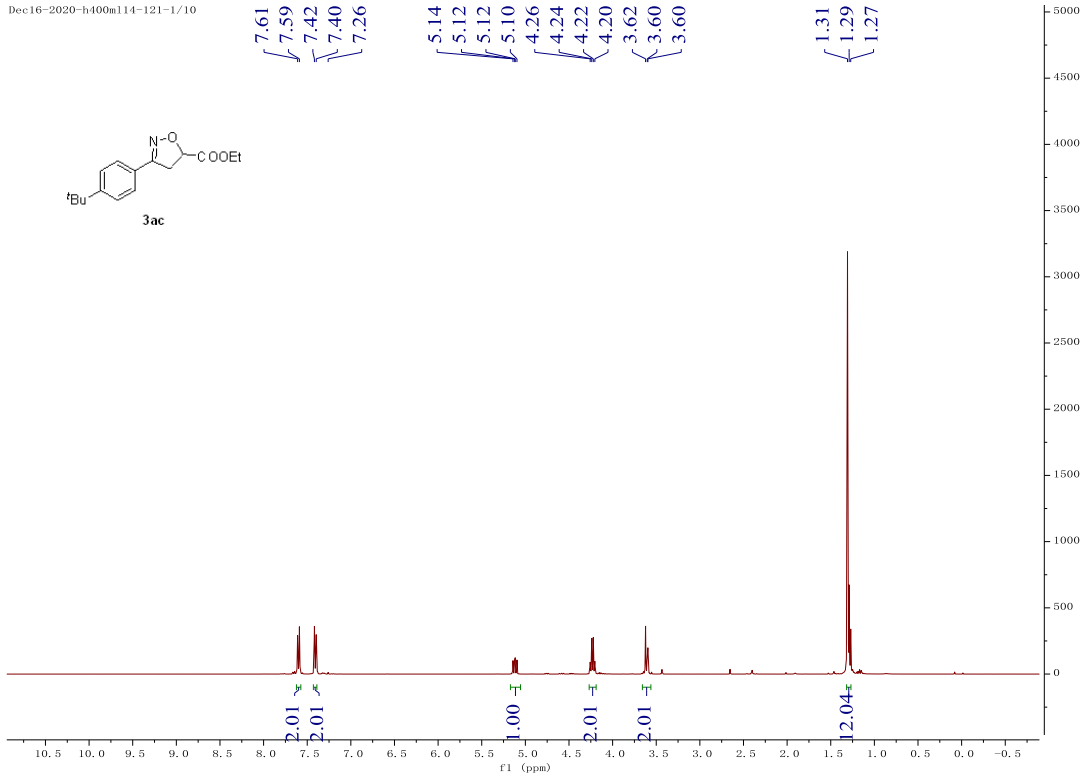

Dec16-2020-c400m114-121-1/10

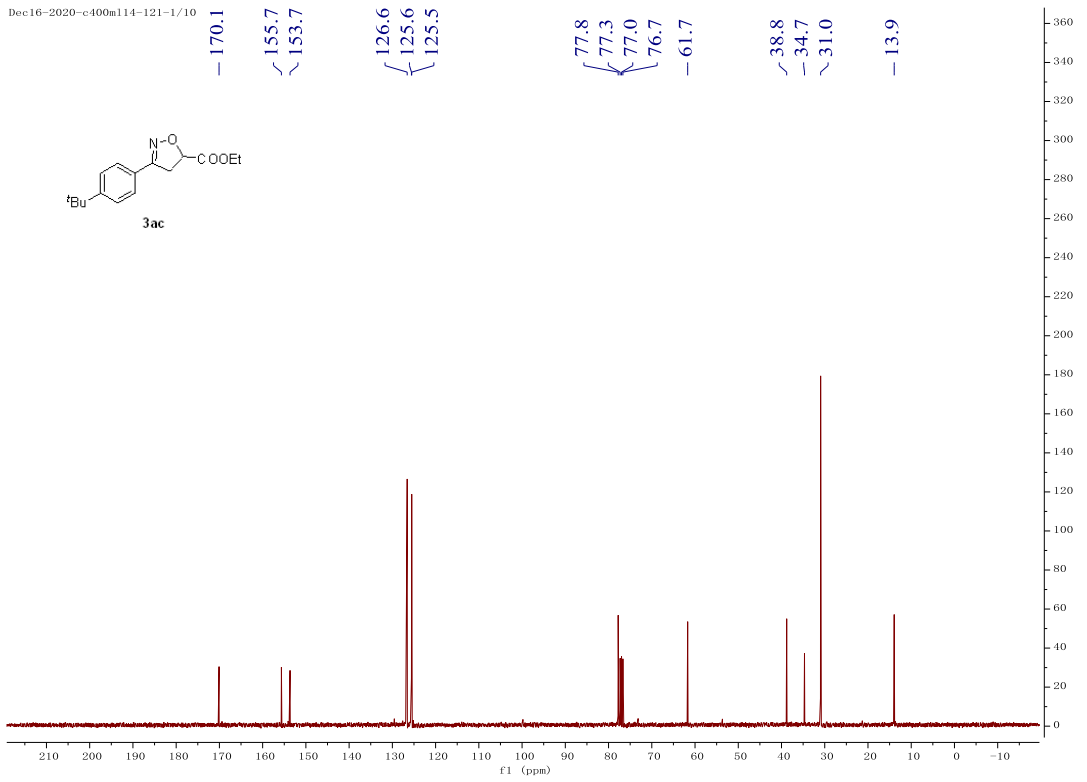

Nov19-2020-h400-ML14-87-2/10

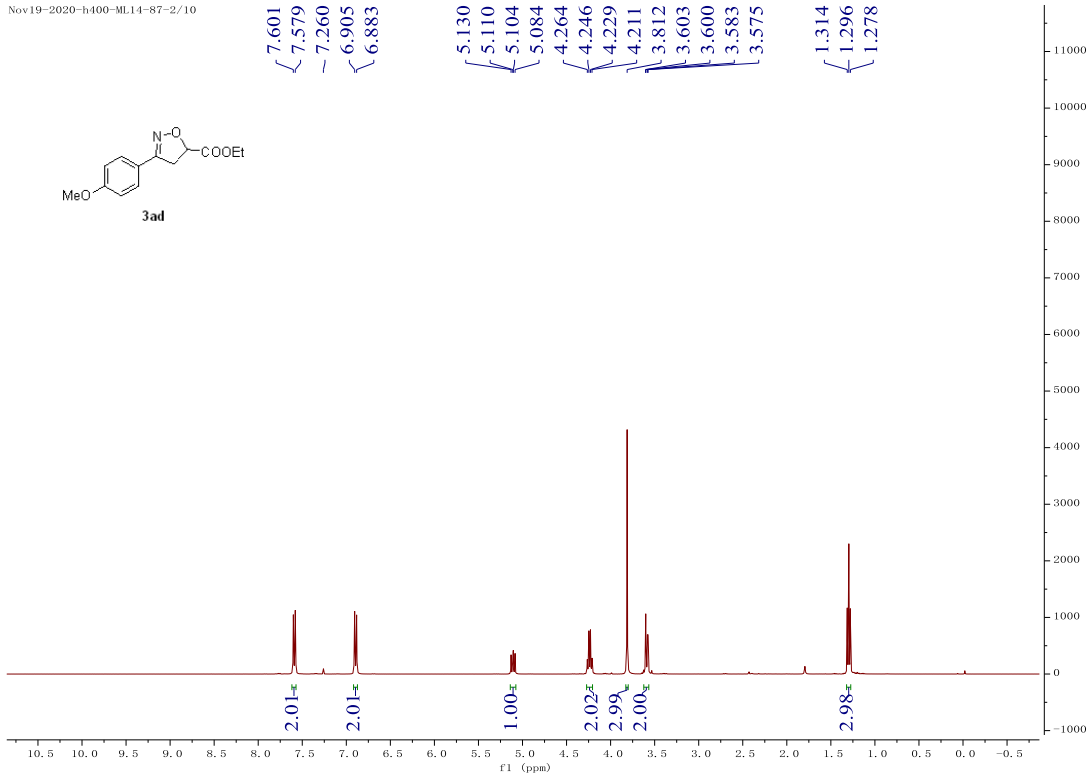

Nov19-2020-C400-ML14-87-2/10

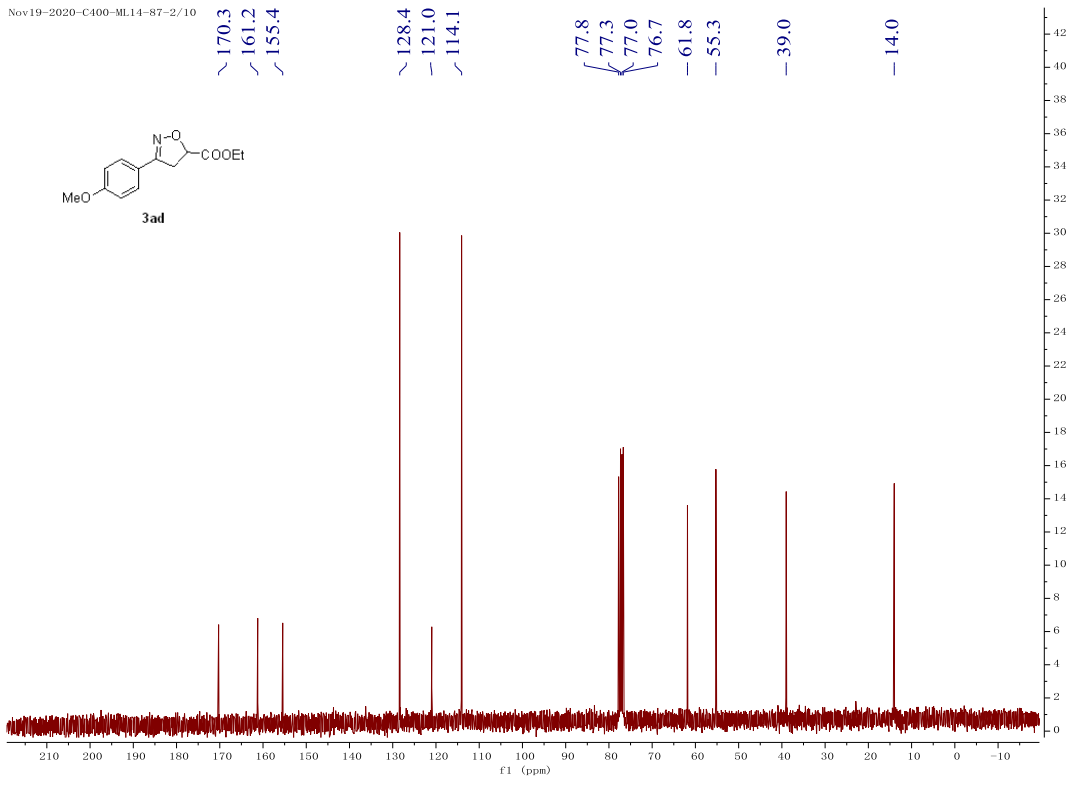

Dec15-2020-h400m114-121-2/10

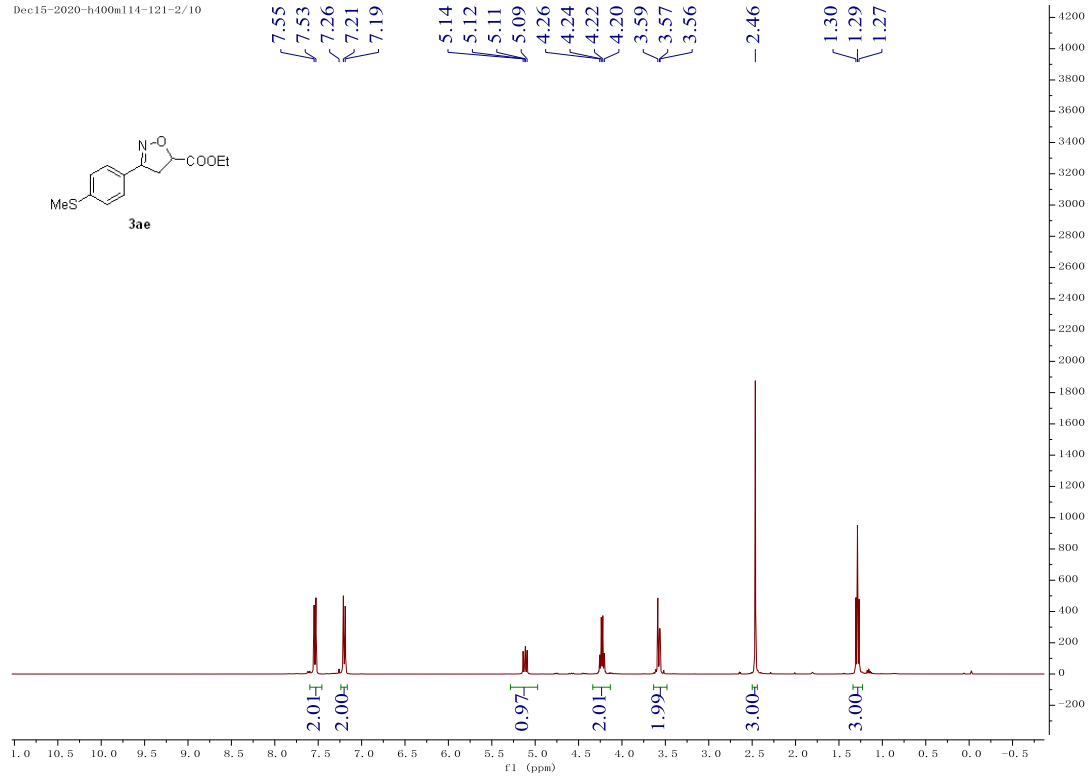

Dec15-2020-c400m114-121-2/0

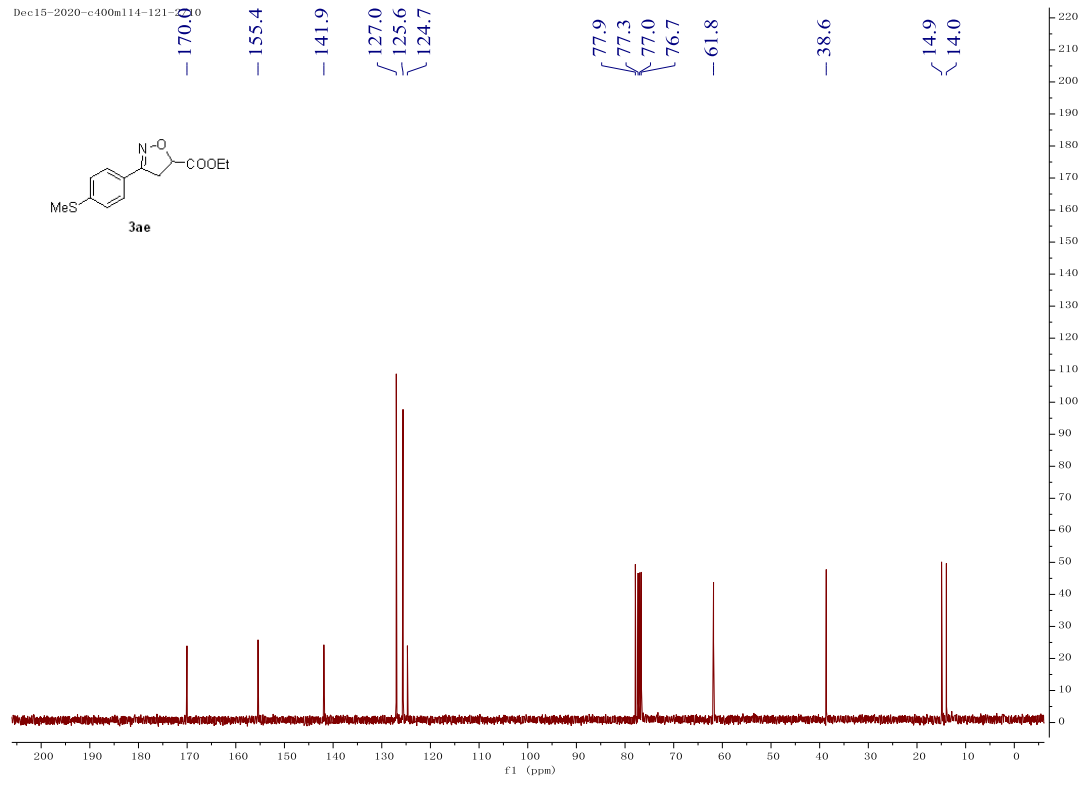



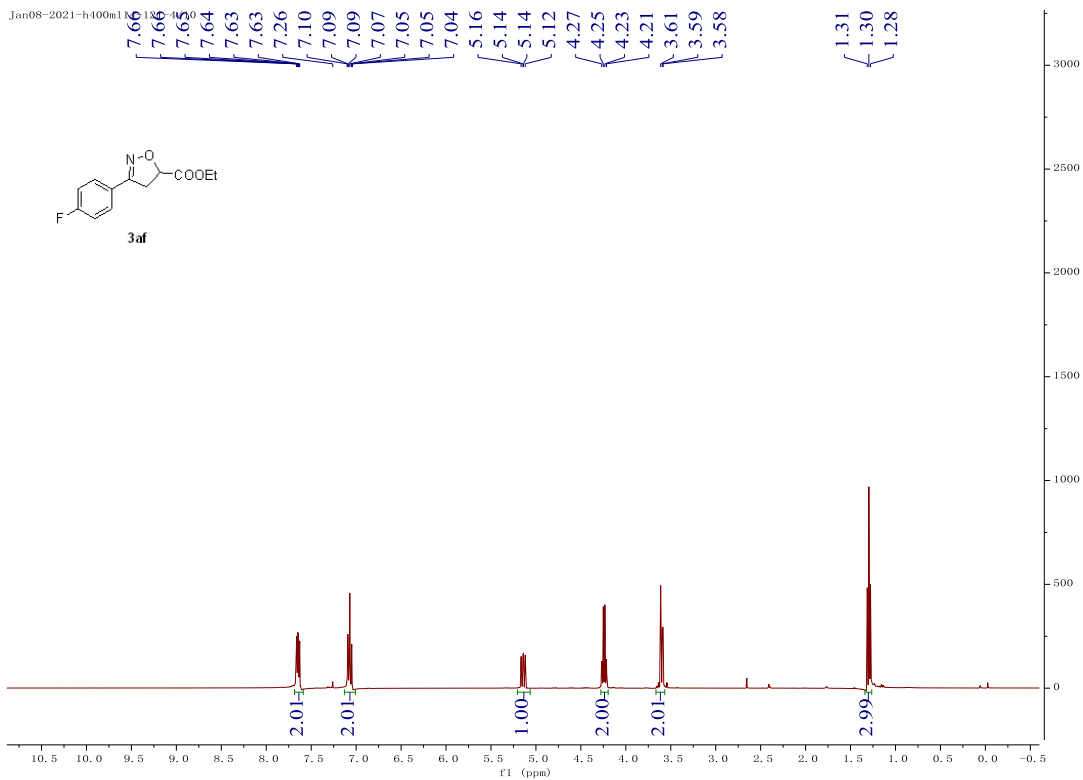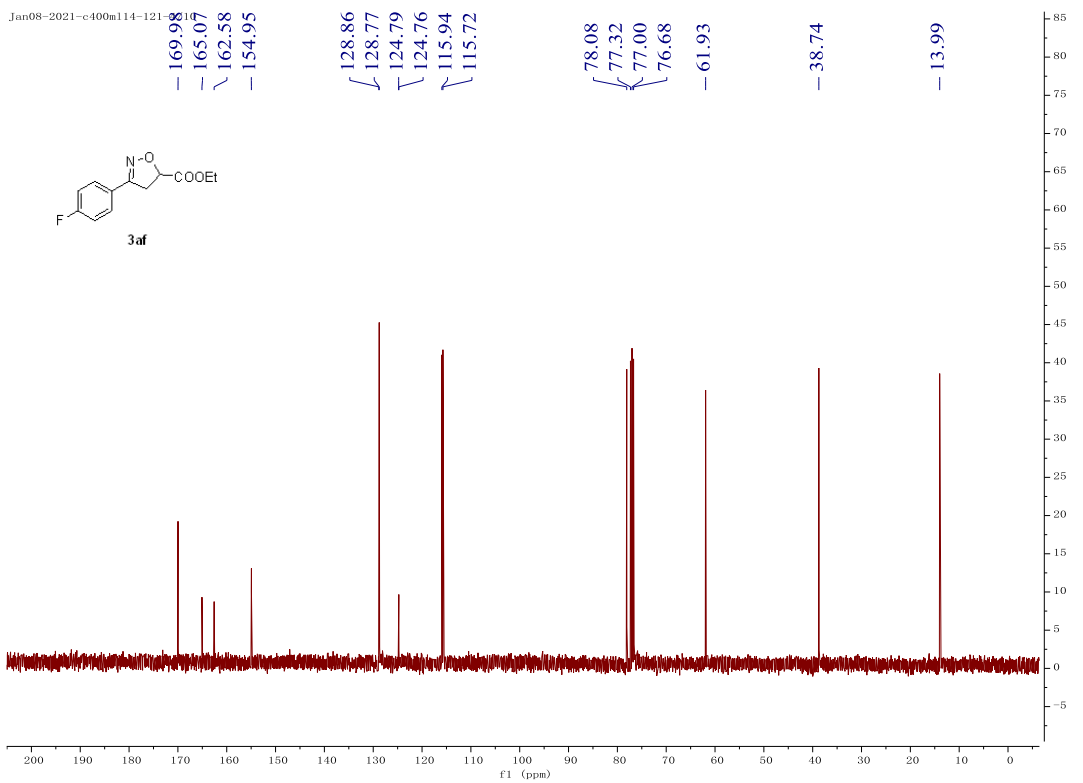

Jan12-2021-f400m114-121-4. 10. 1. 1r

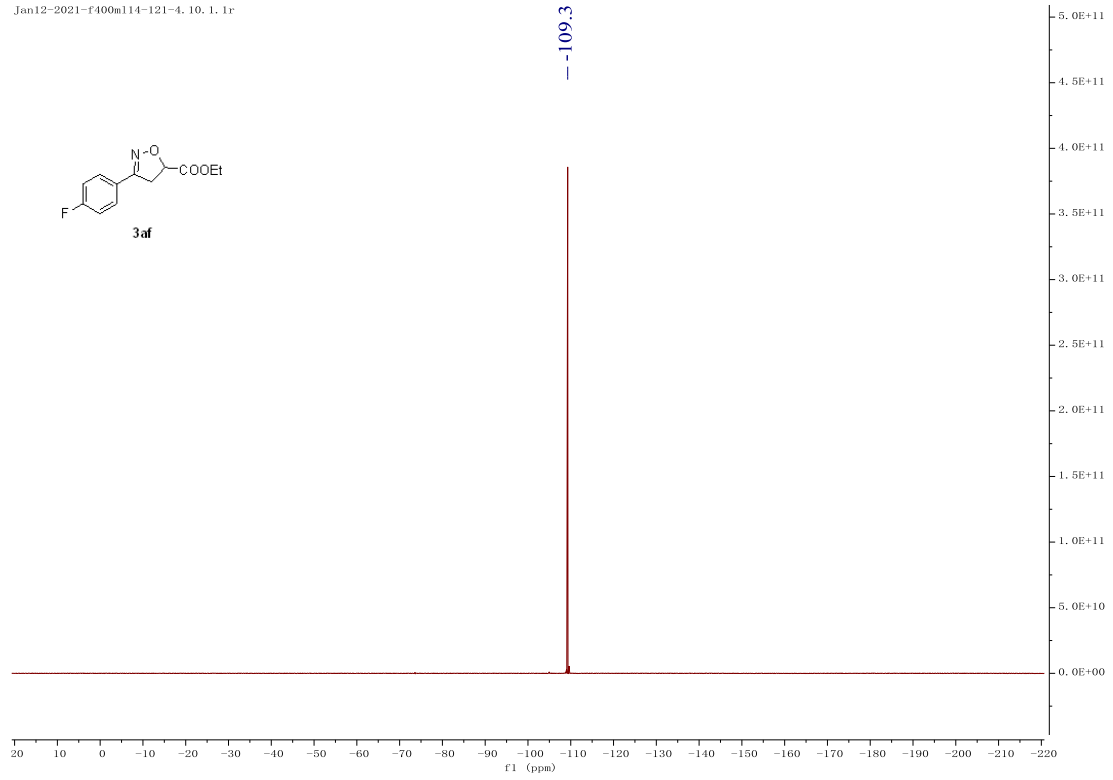

Dec04-2020-h400-ML14-111-2/10

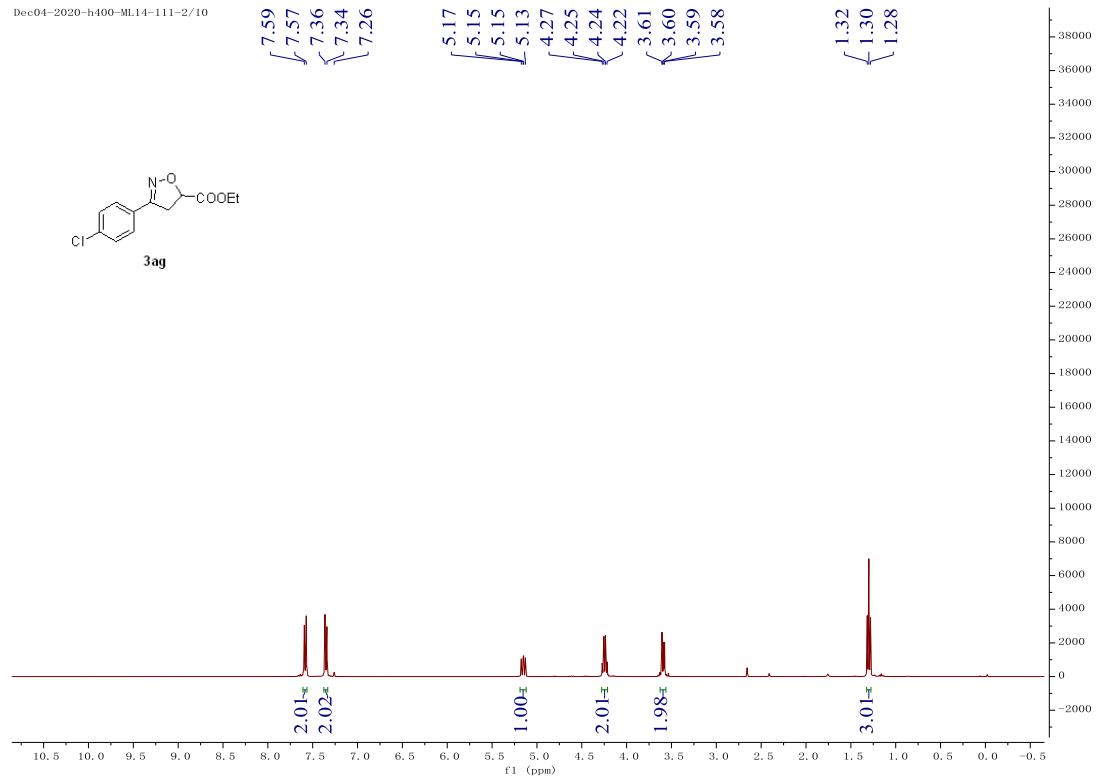

Dec04-2020-c100-ML14-111-910

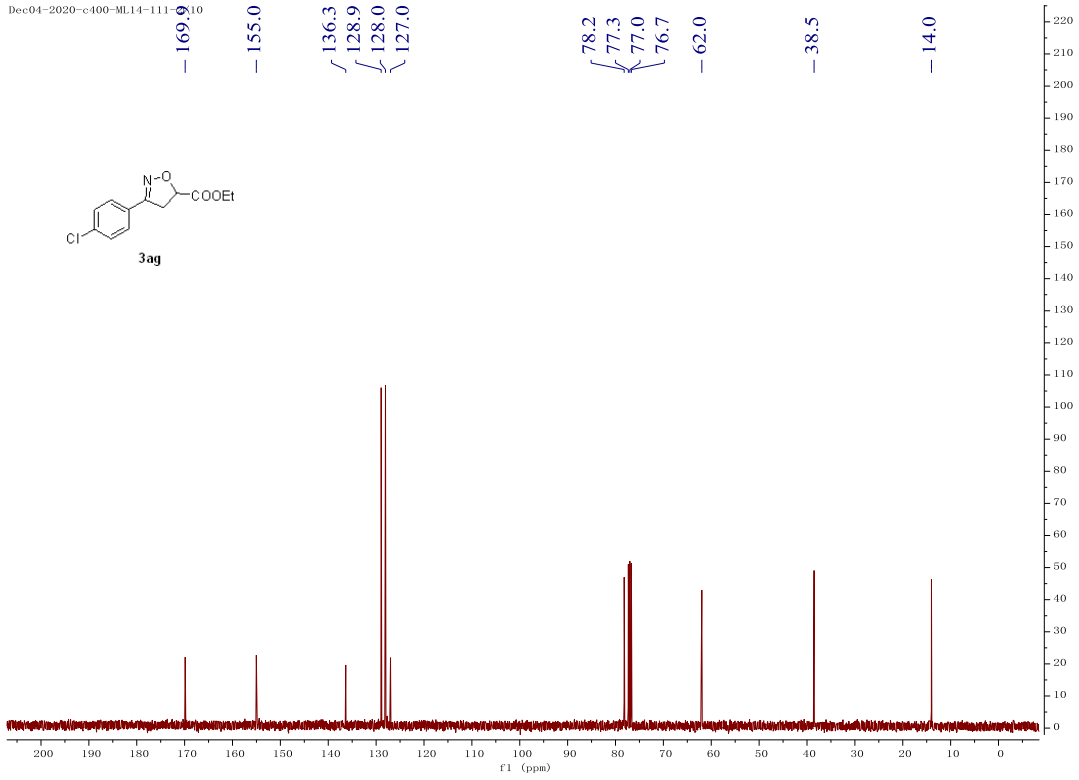

Jan07-2021-H400m114-121-5.10.1.1r

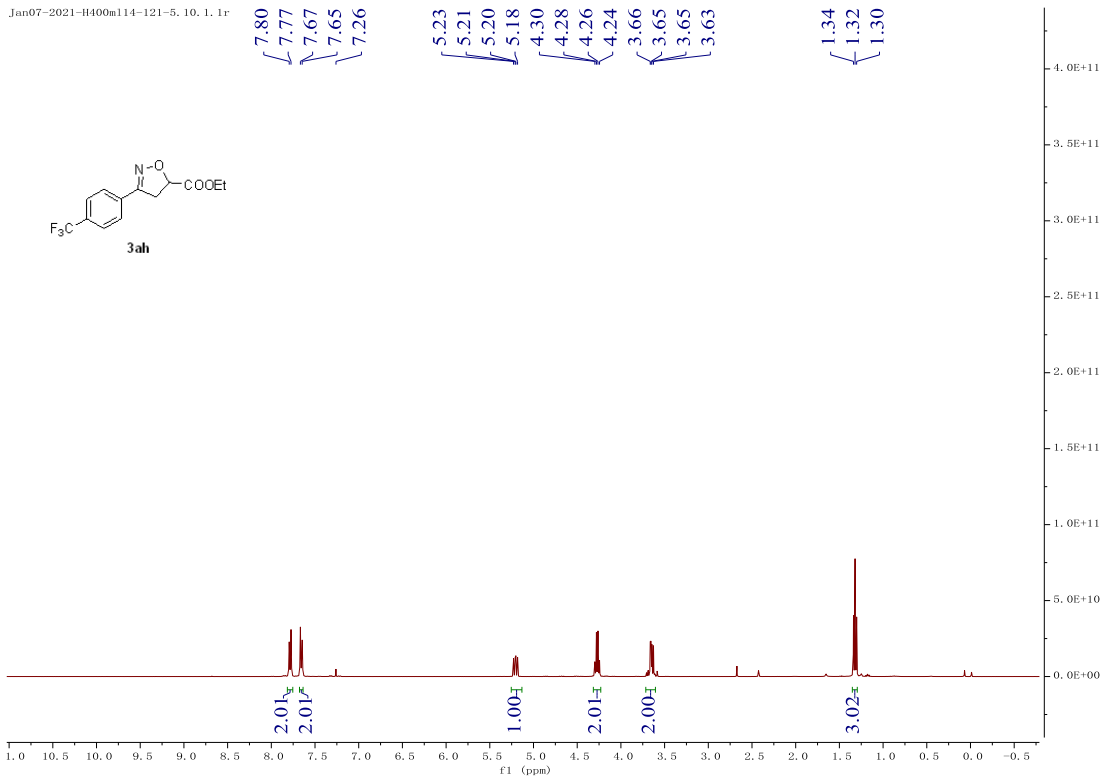

Jan07-2021-c400m114-121-50.2.1.1r

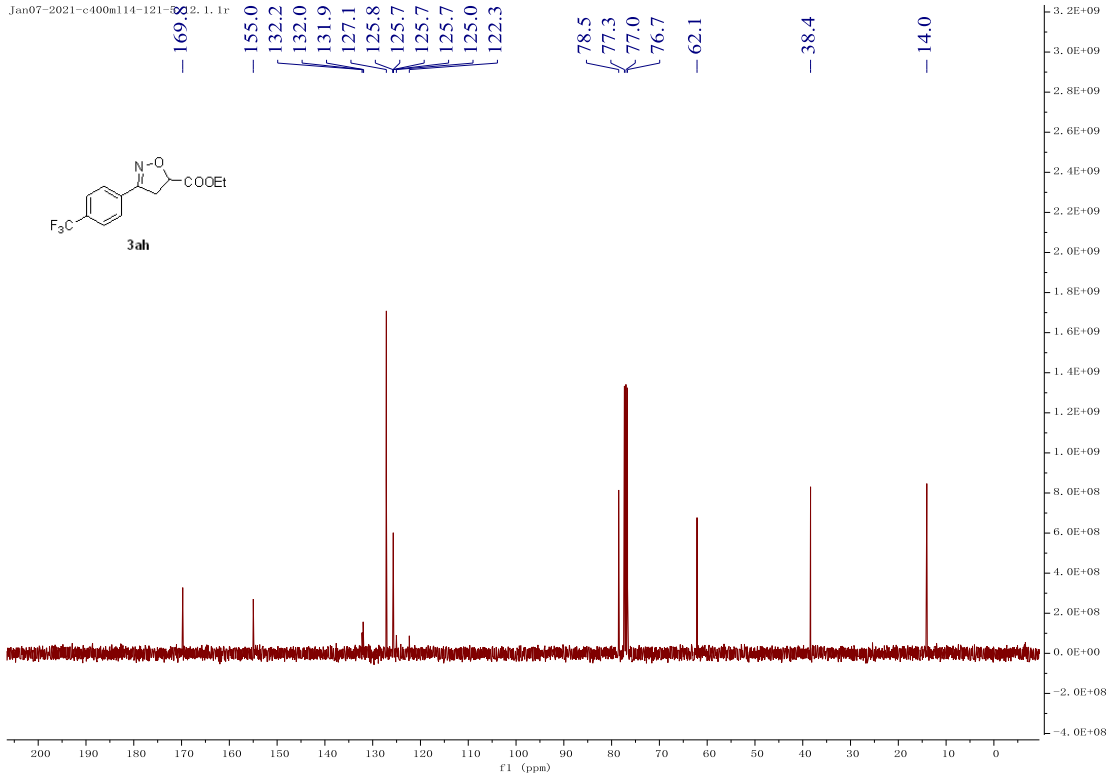

Jan12-2021-f40014-121-5.10.1.1r

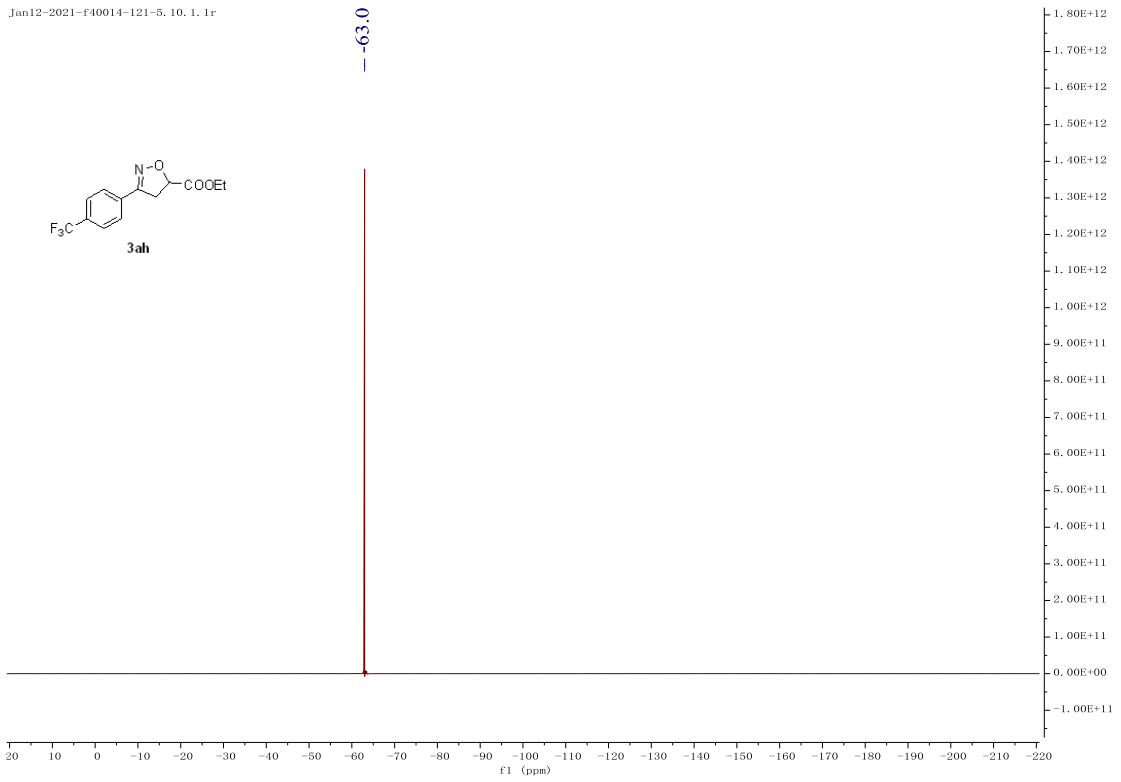

Jan12-2021-H400m115-3-1

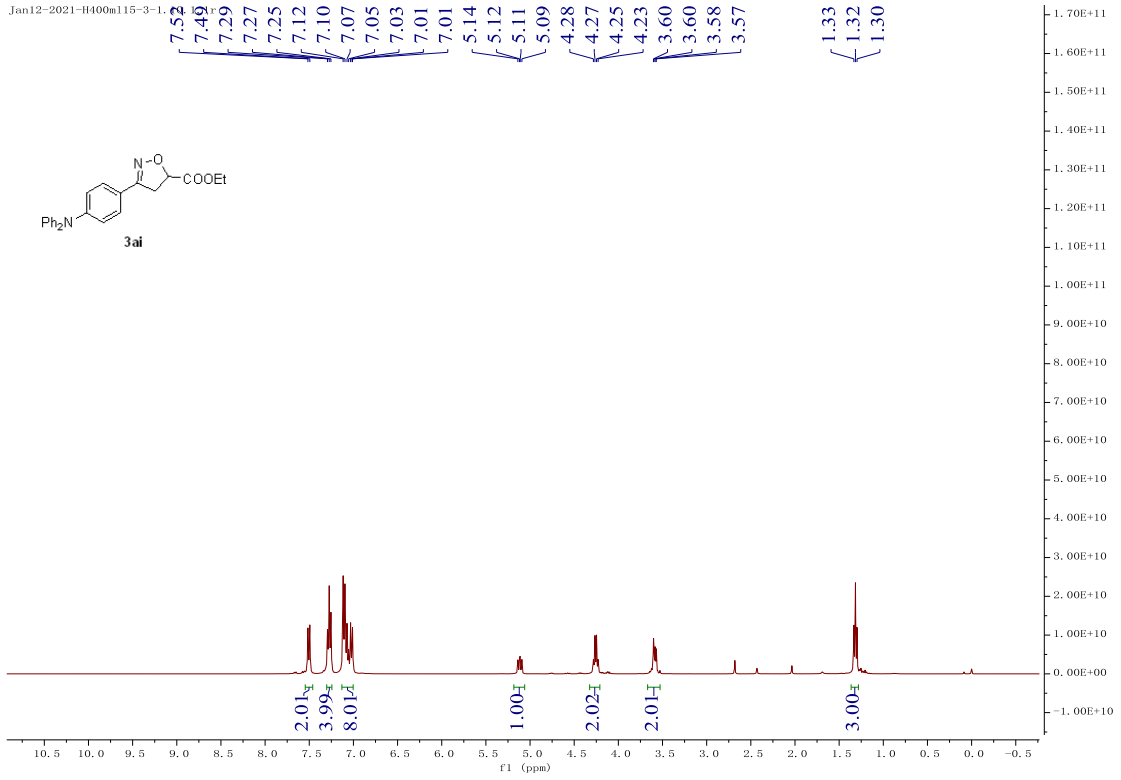

Jan12-2021-c400m115-3-1, 12.1

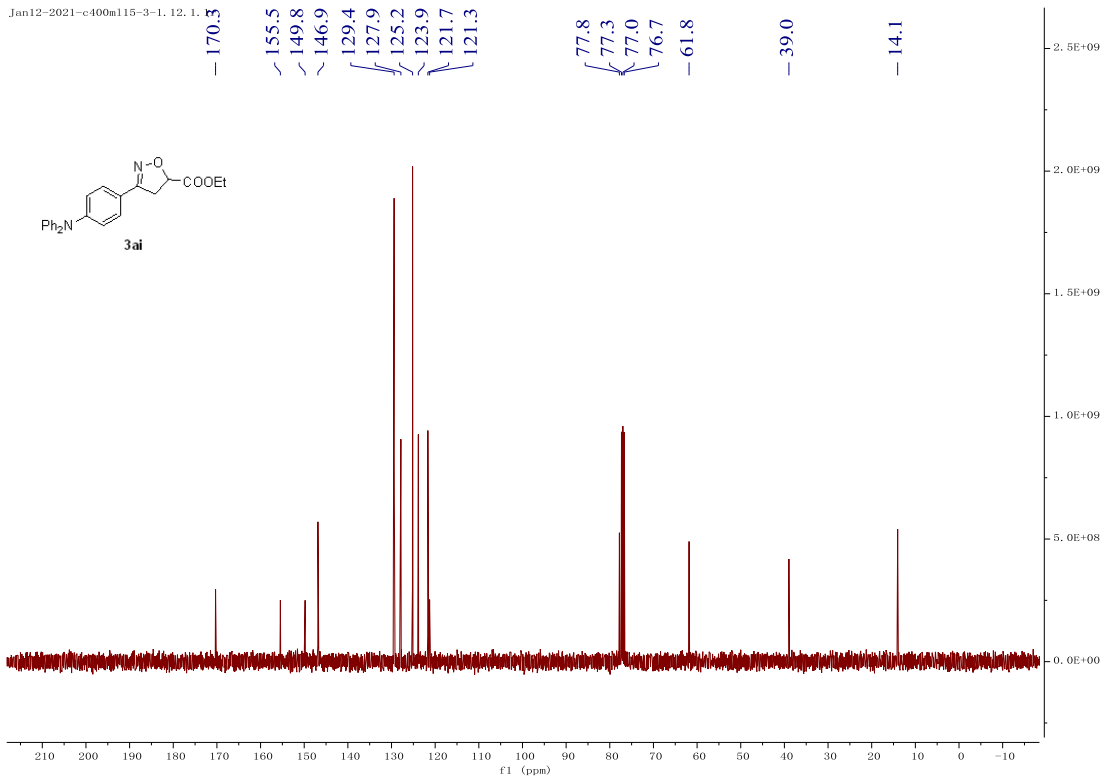

Dec15-2020-h400114-121-6/10

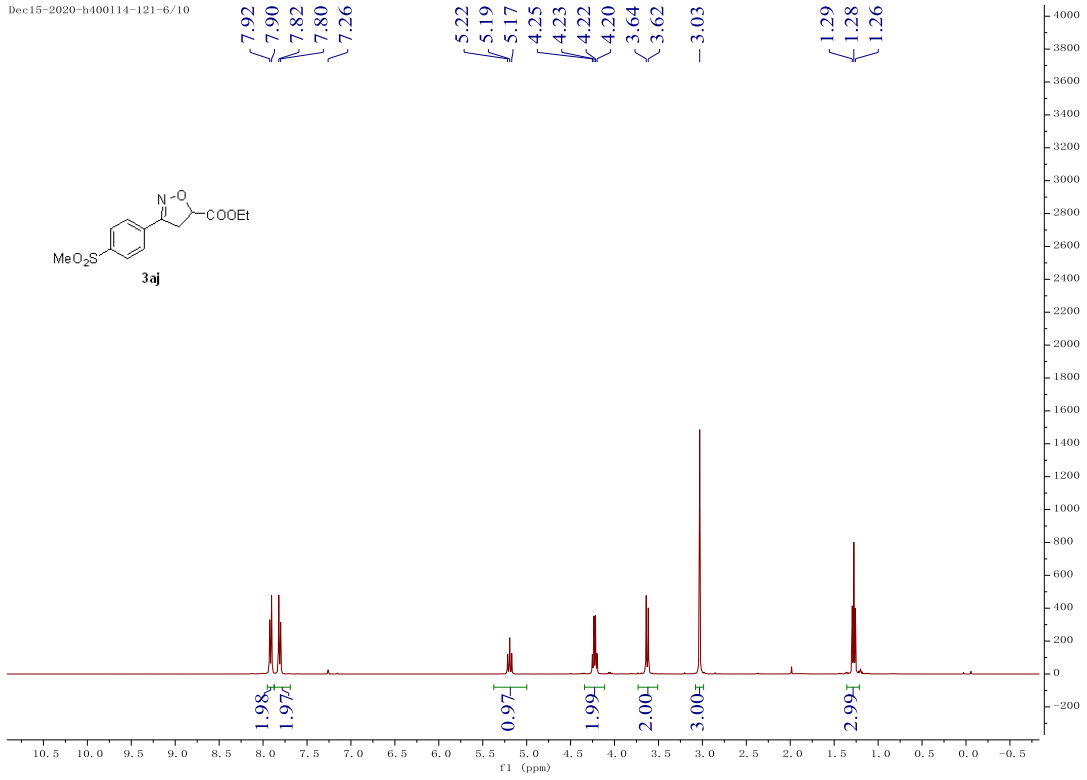

Dec15-2020-e400114-121-6/10

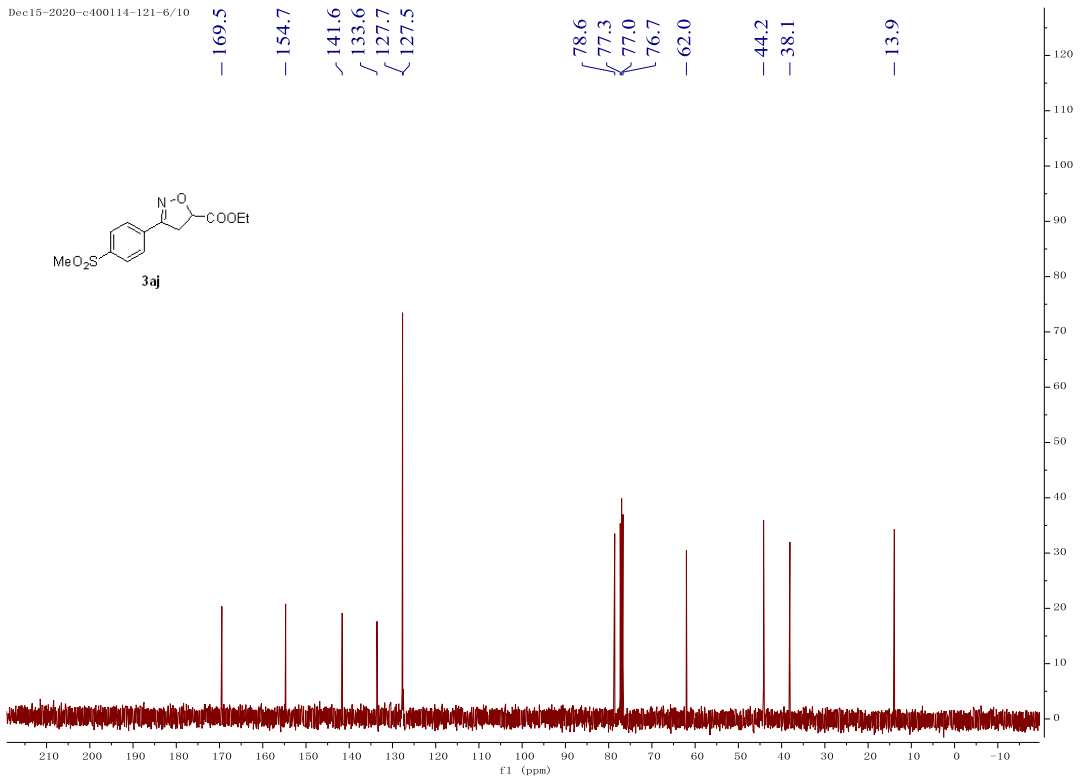

Feb25-2021-h400ML14-4CN/10

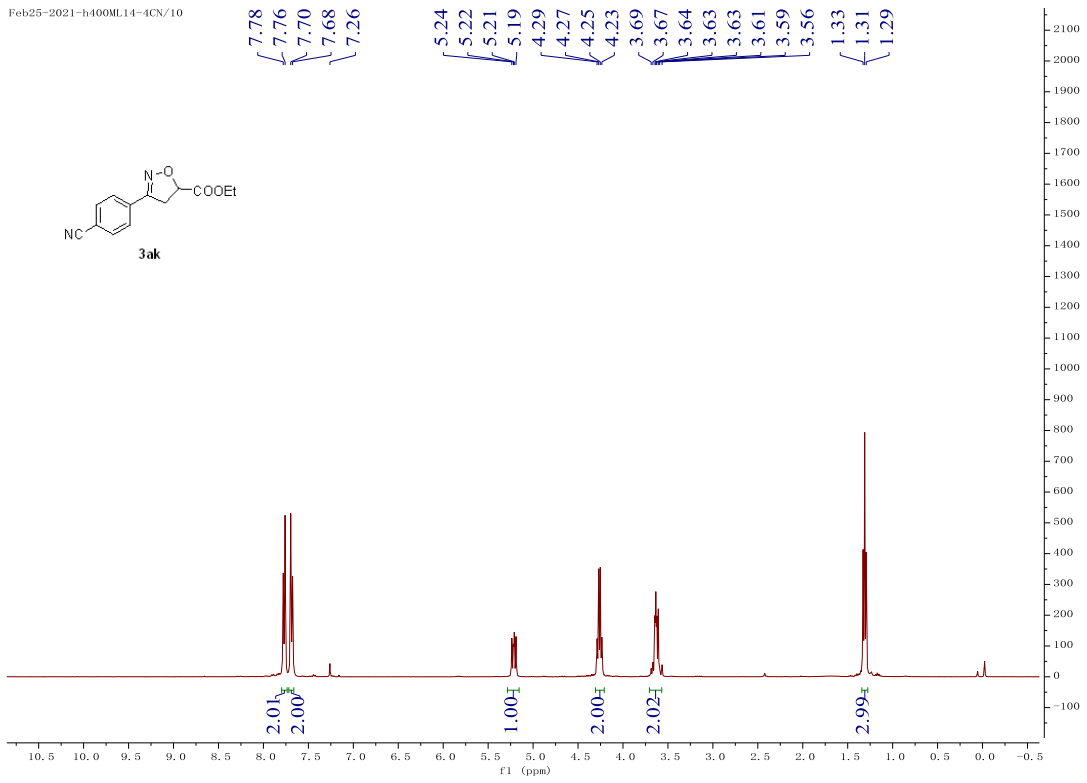

Feb25-2021-C400ML14-4CN/10

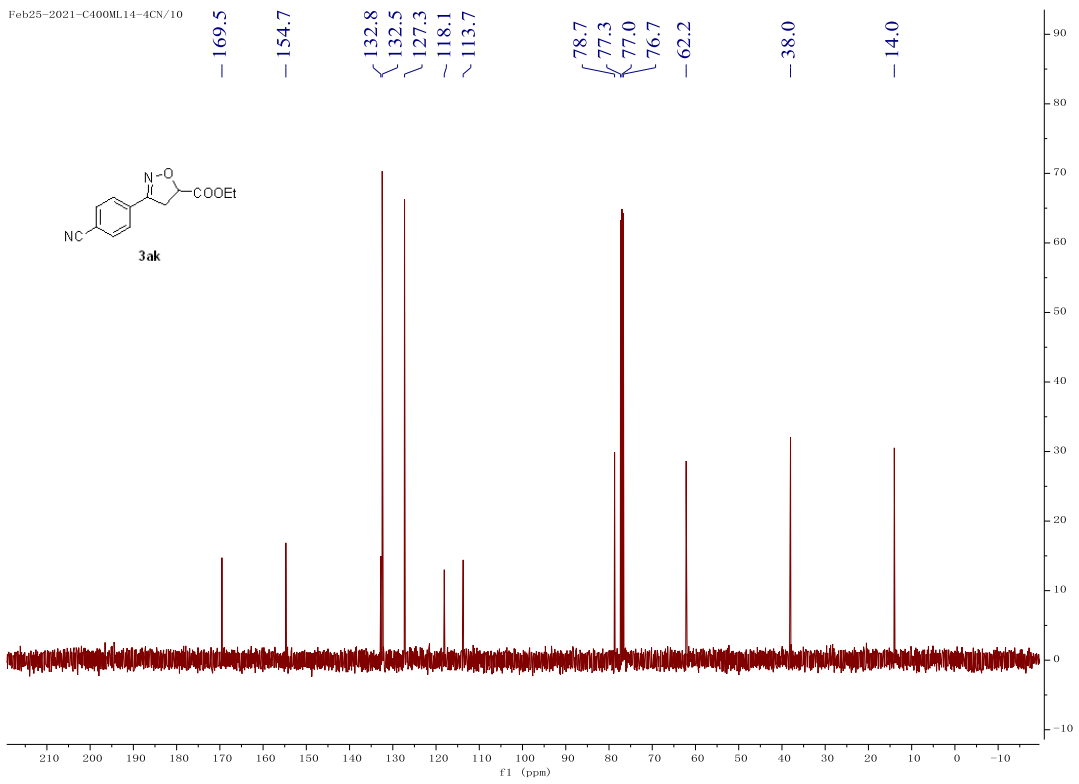

Dec04-2020-h4000-ML14-111-5/10

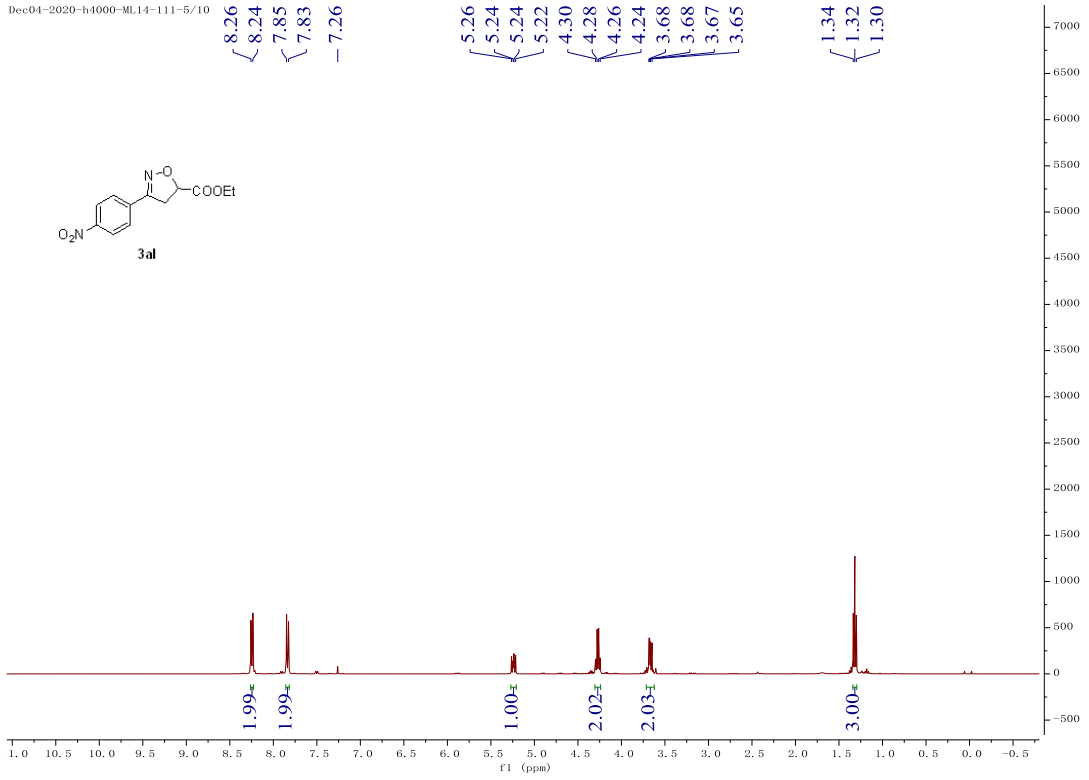

Dec04-2020-C4000-ML14-111-5/10

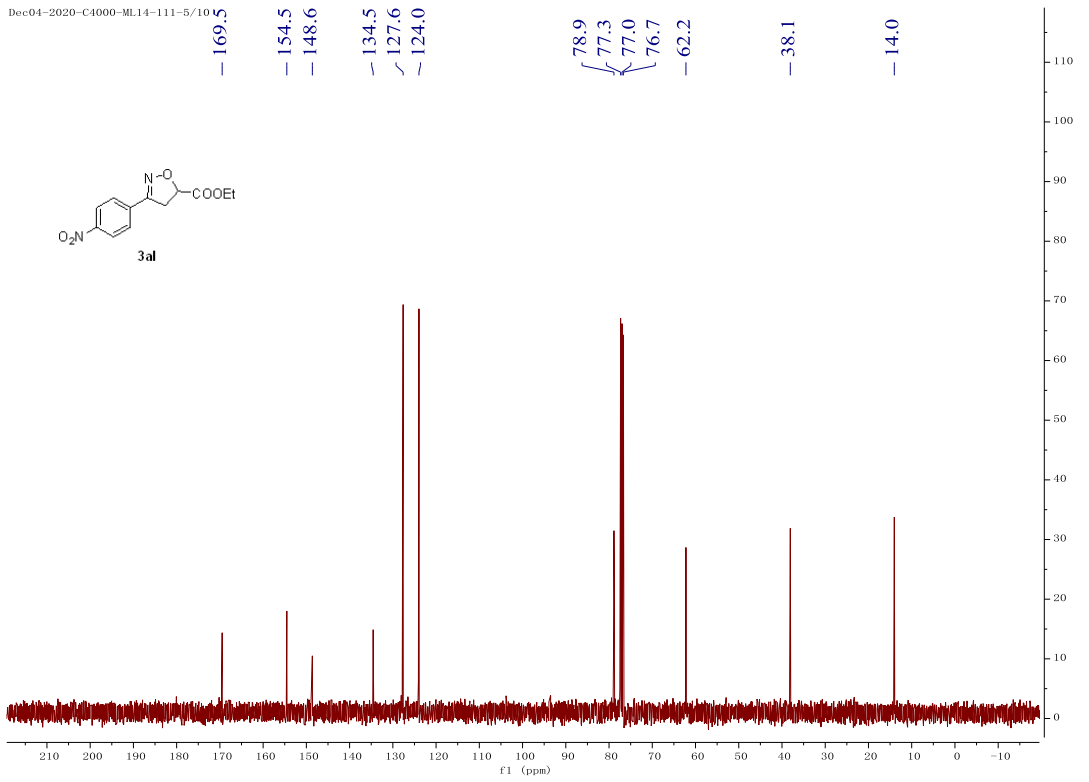



Jan06-2021-h400-ML14-113-4/10

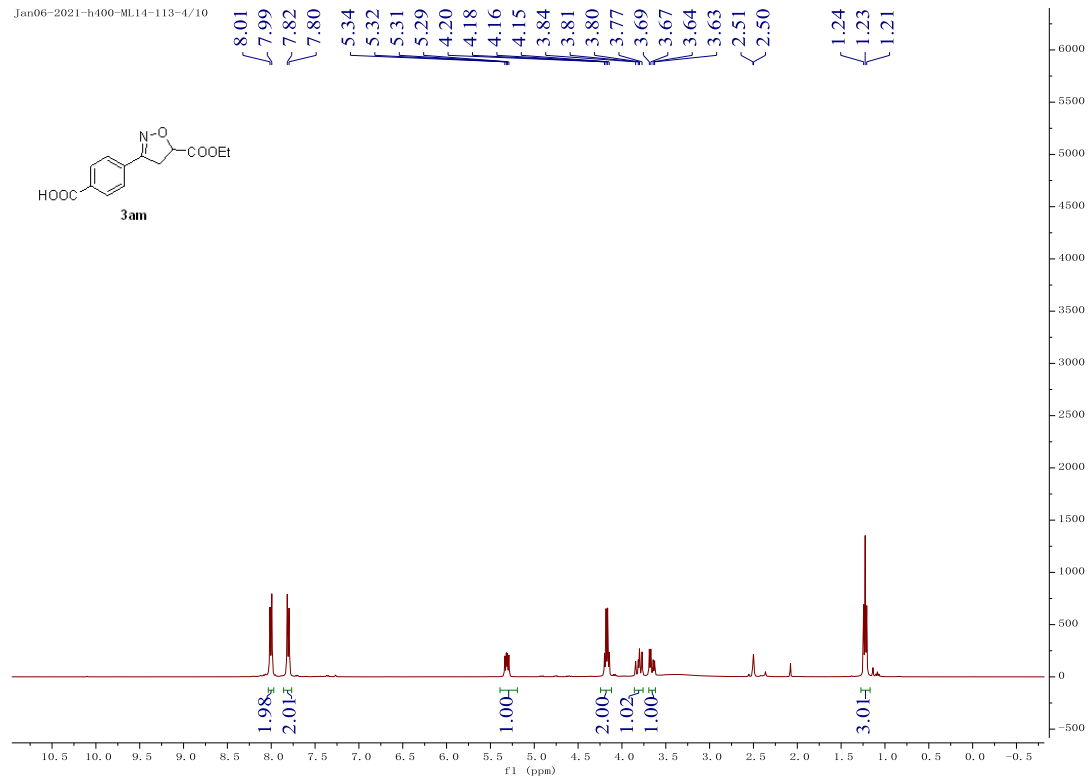

Jan06-2021-h400-ML14-113-4/10

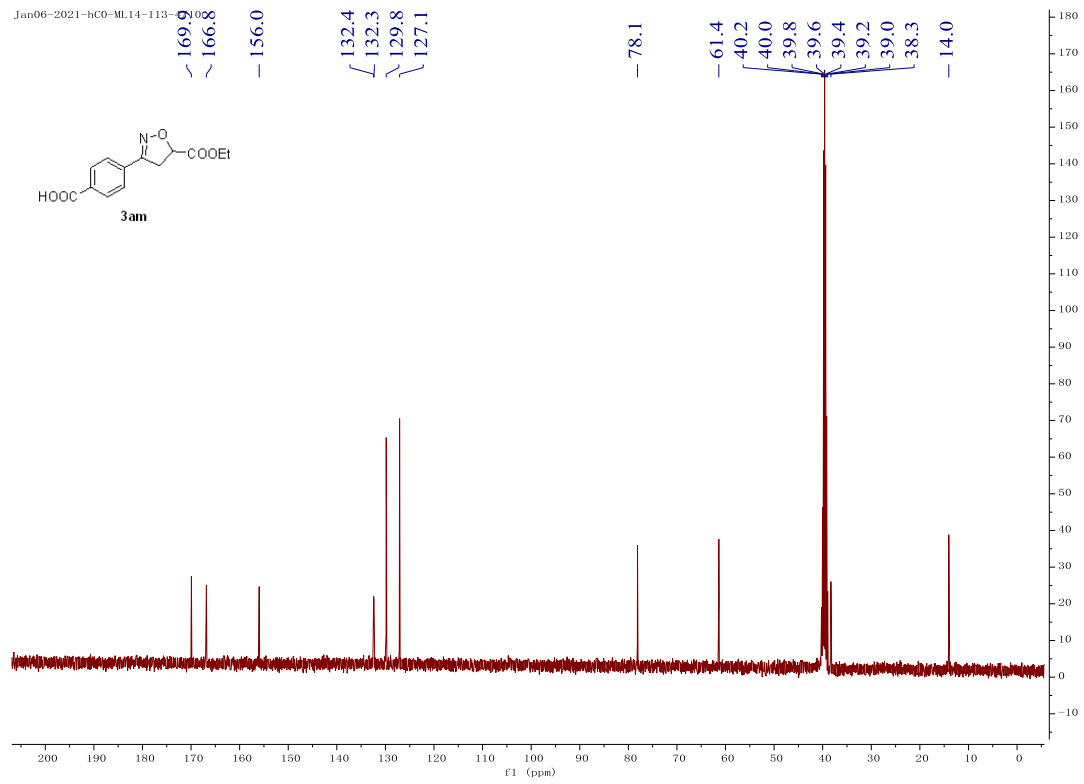

Dec15-2020-b400m114-12-3/10

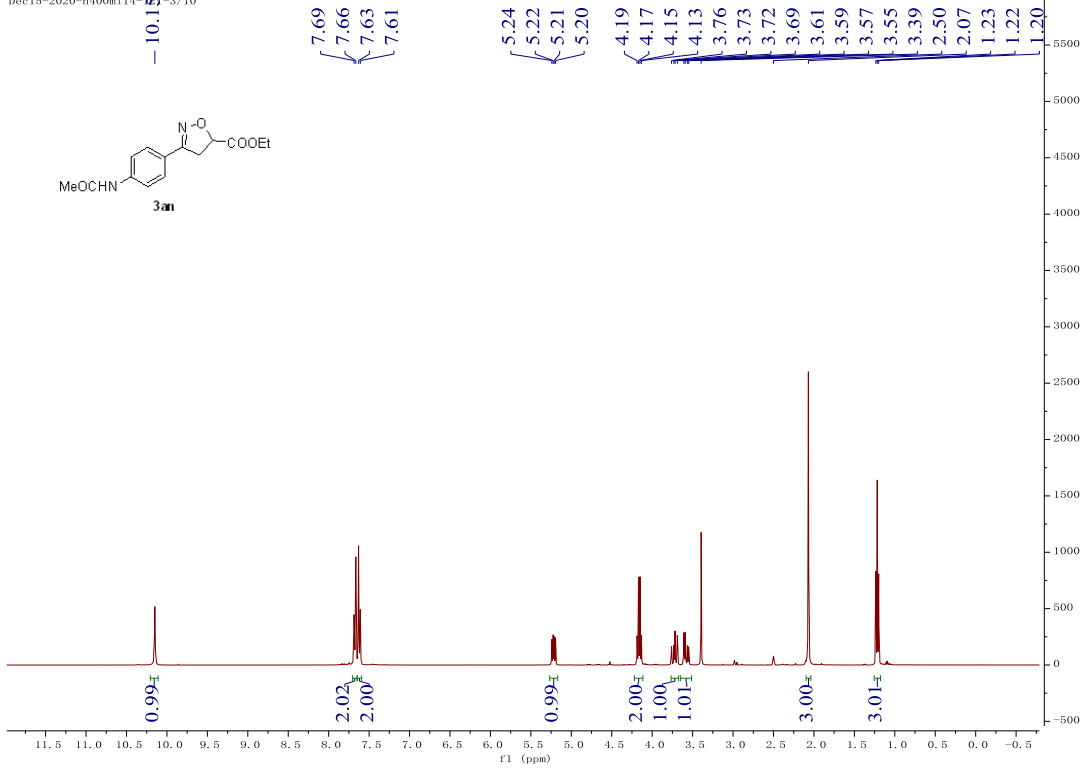

Dec15-2020-c400m114-121-3/10

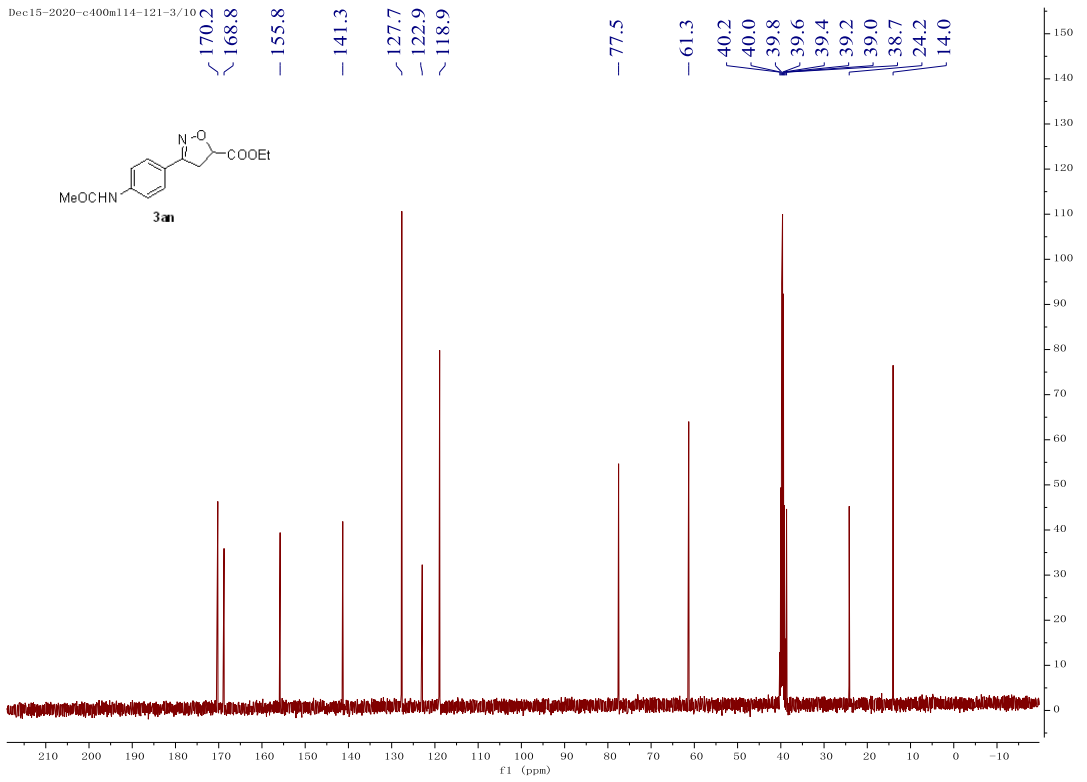

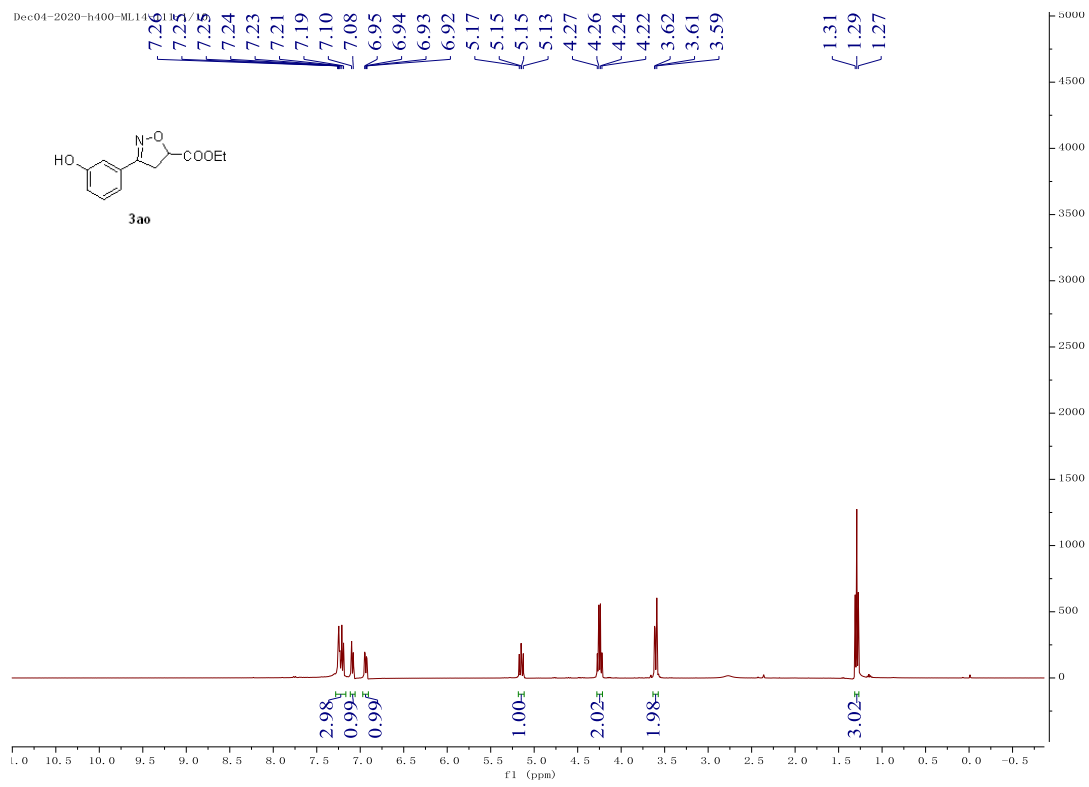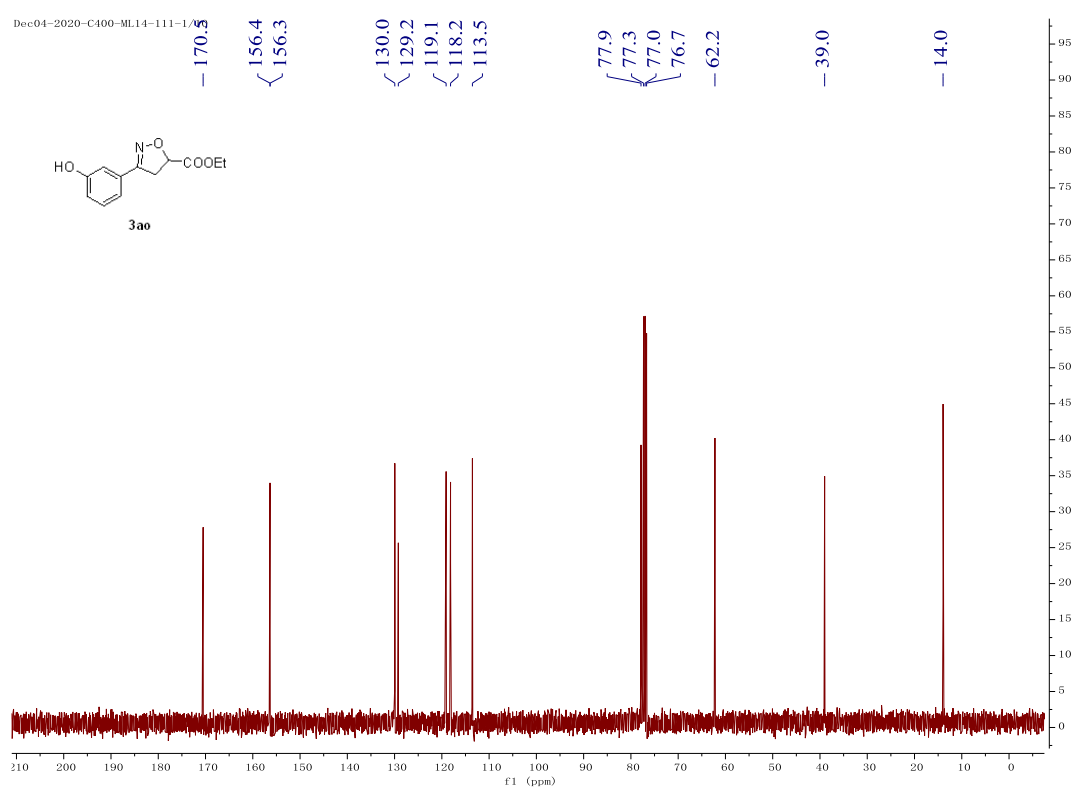

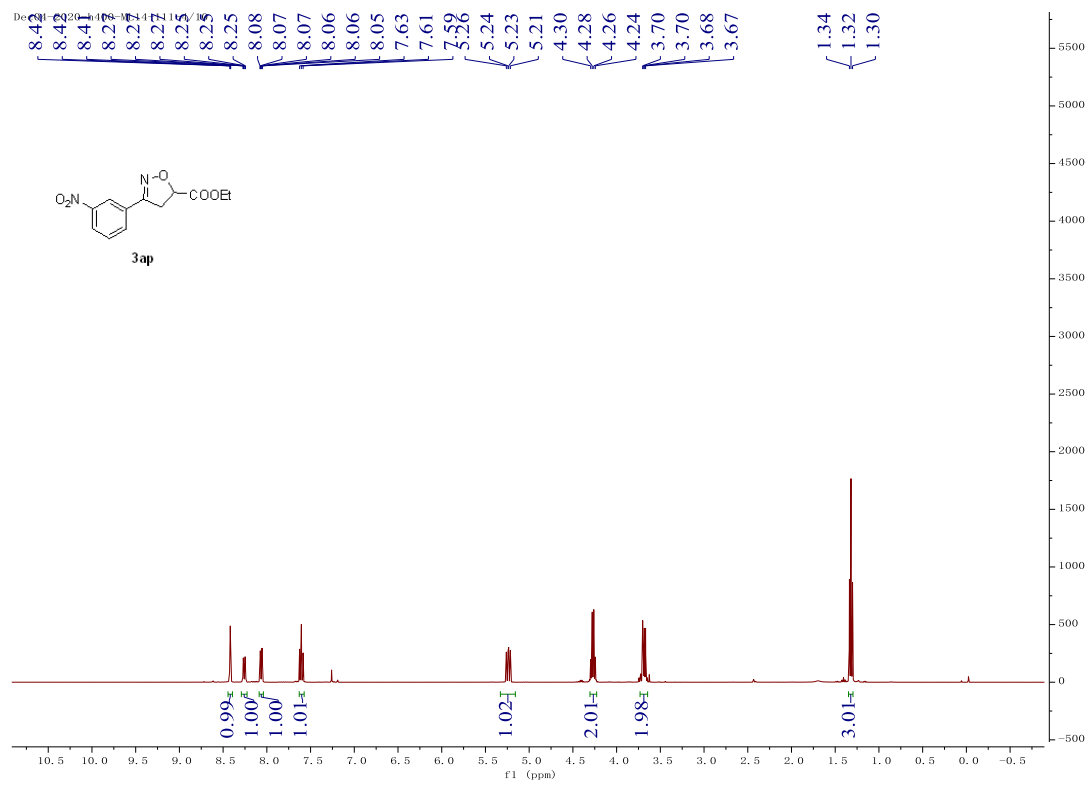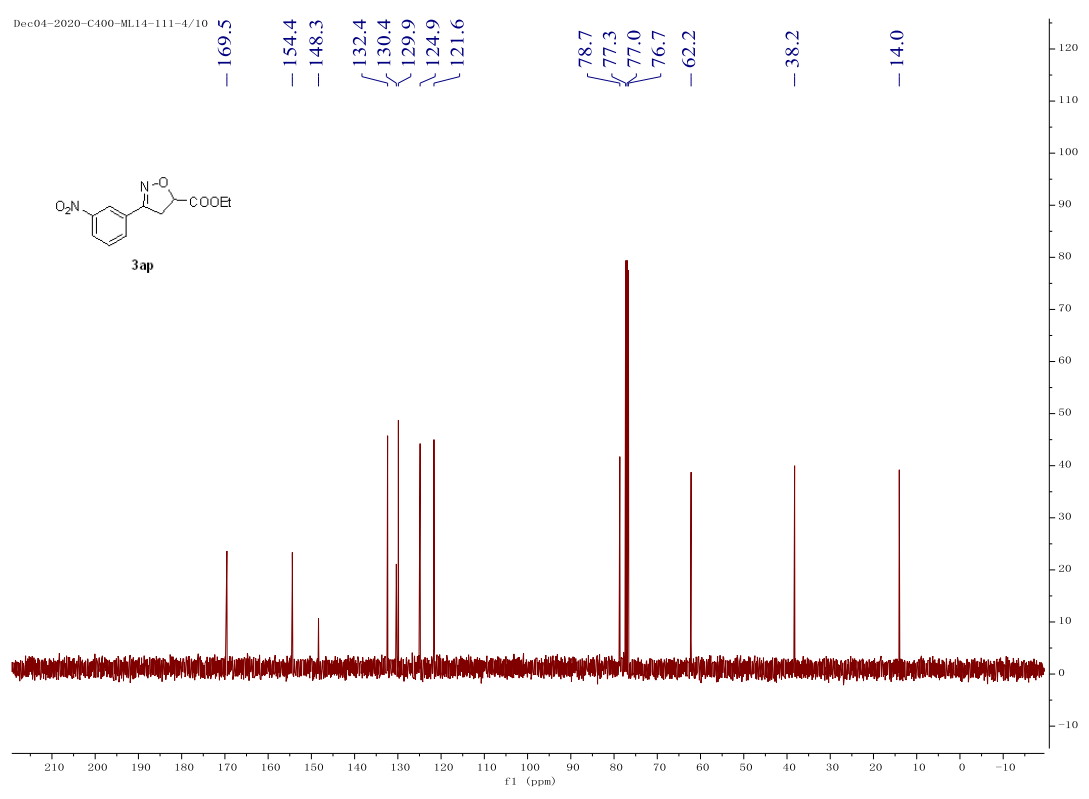

Dec04-2020-h4000-ML14-111-

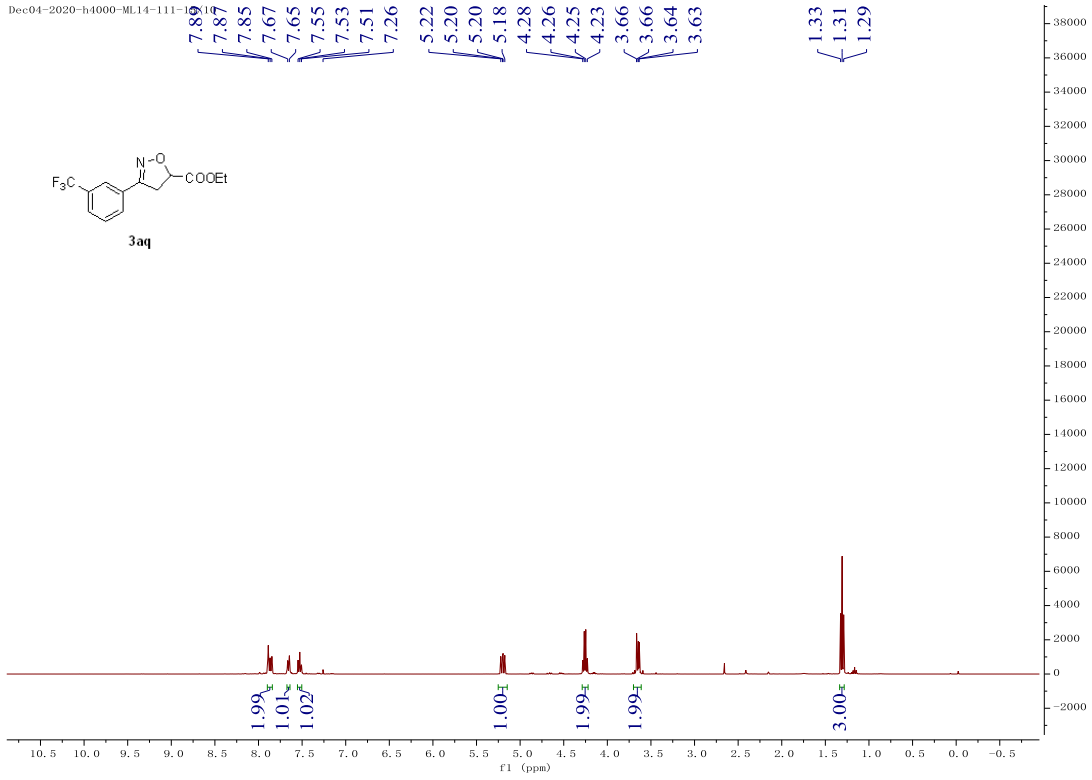

Dec04-2020-C4000-ML14-15/10

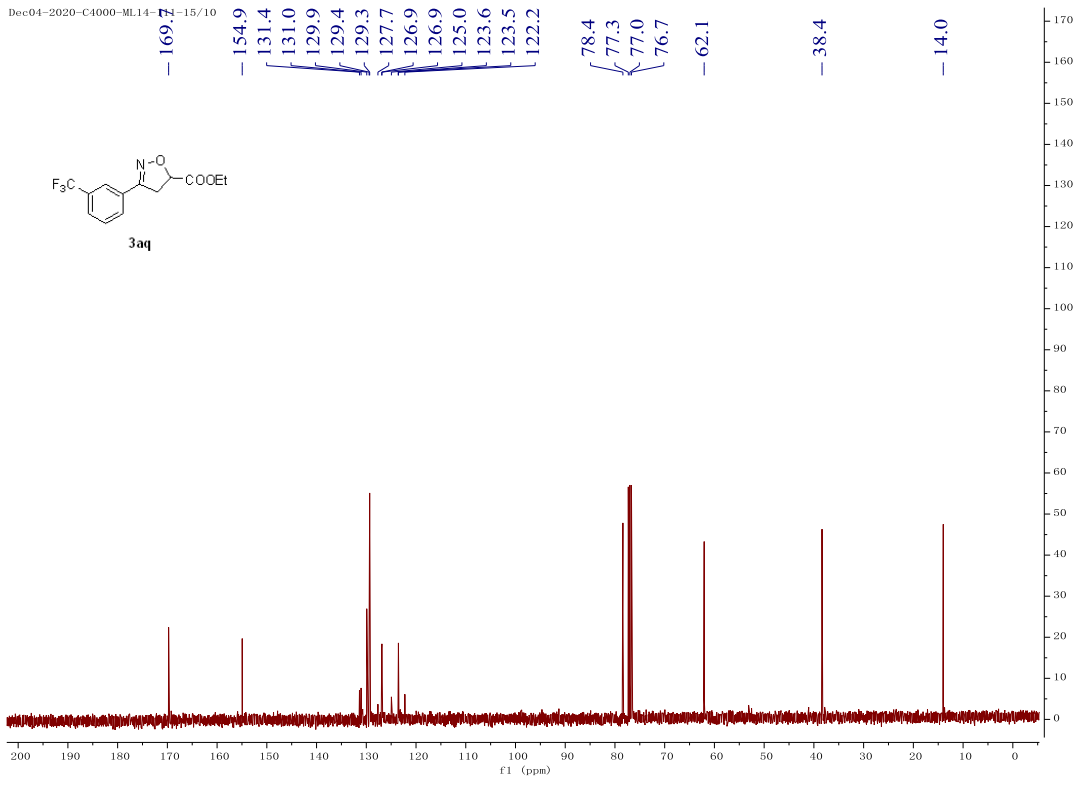

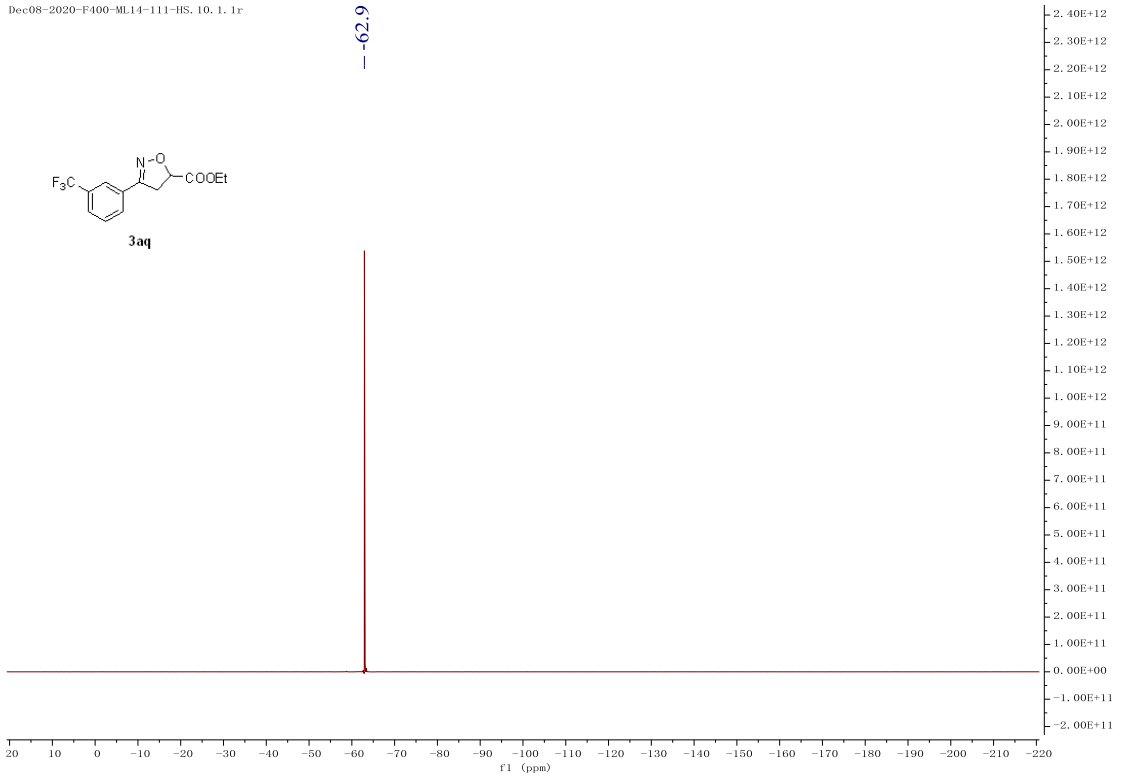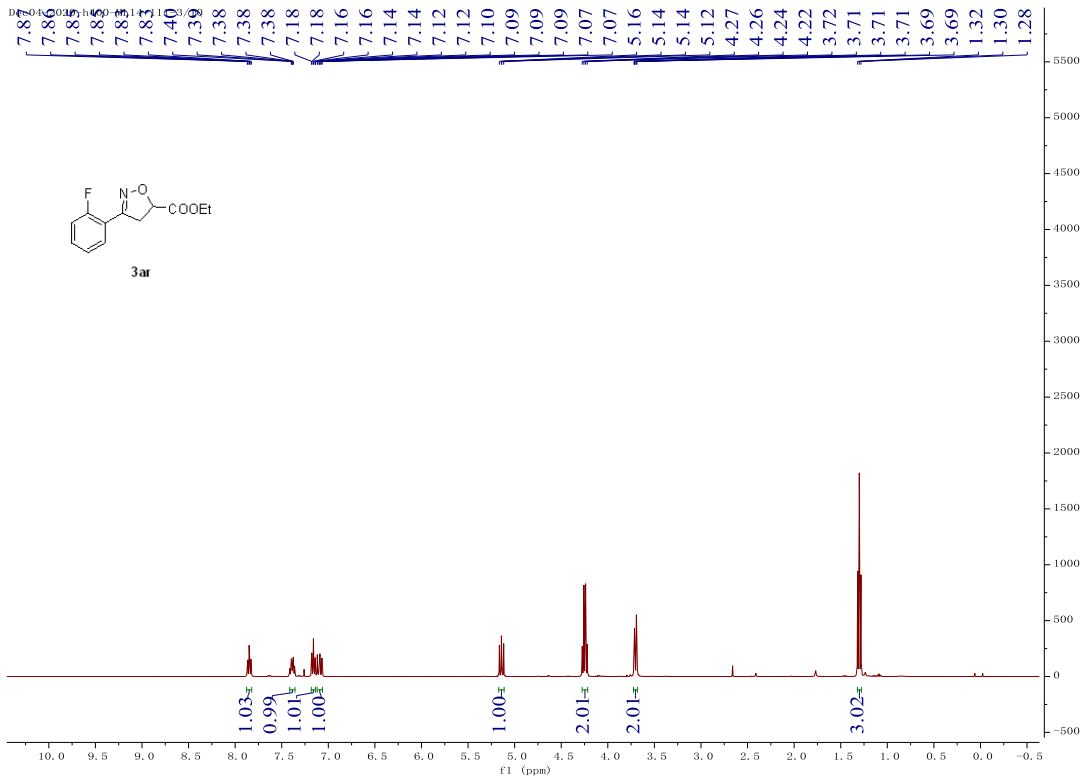

Dec04-2020-C400-ML14-111-3

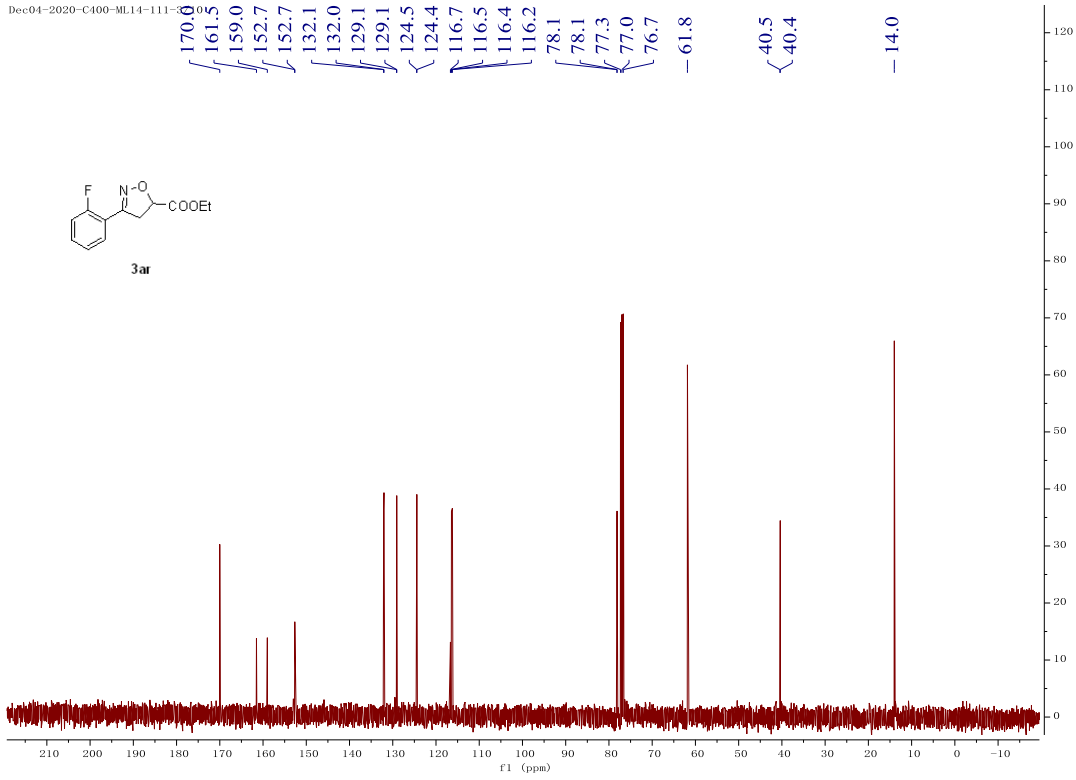

Dec08-2020-F400-ML14-111-3. 10. 1. 1r

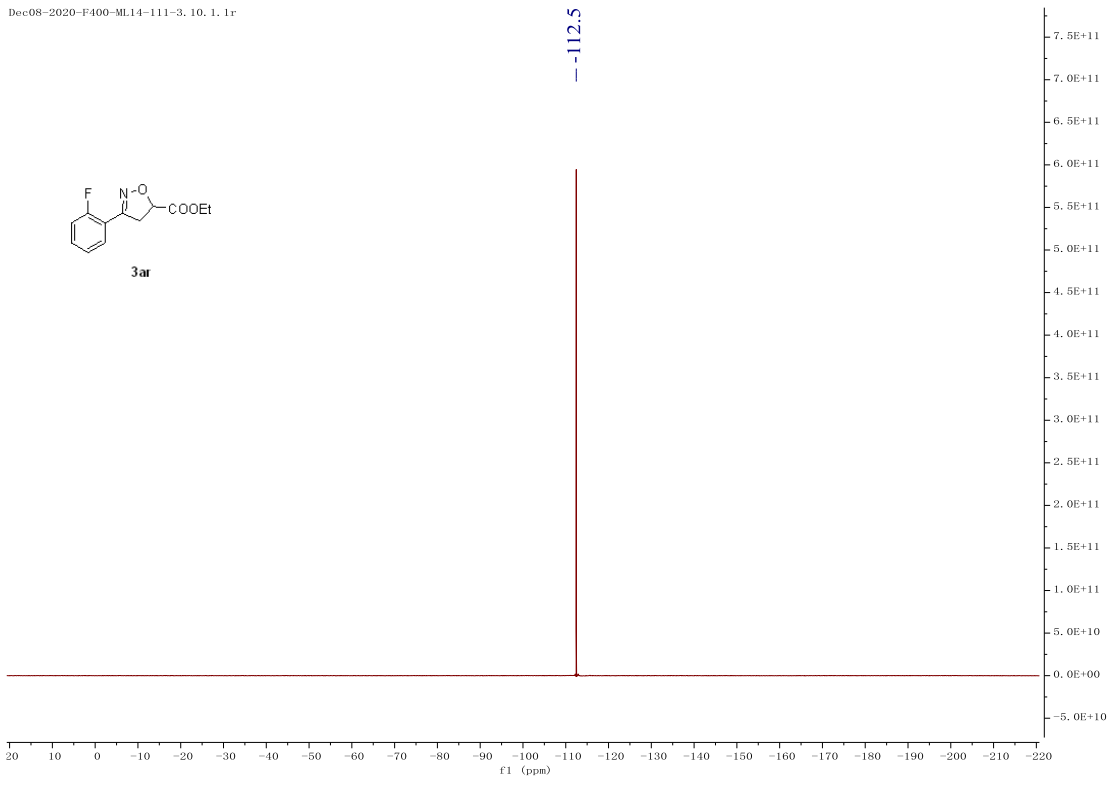

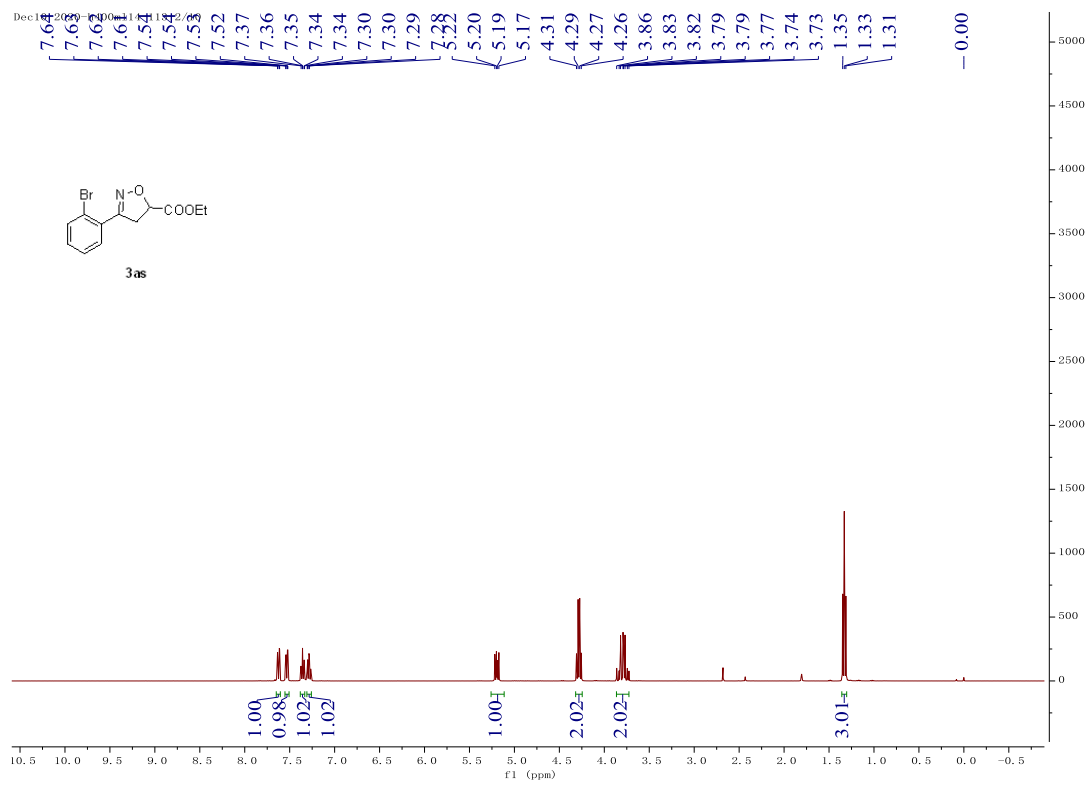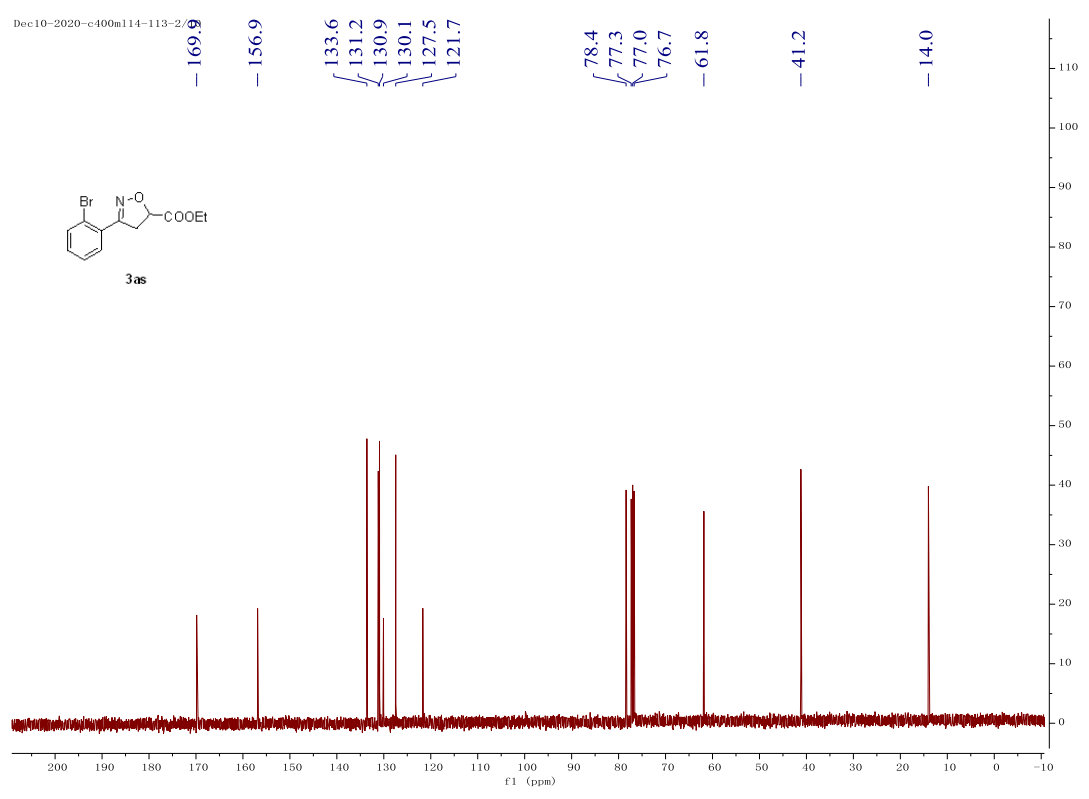



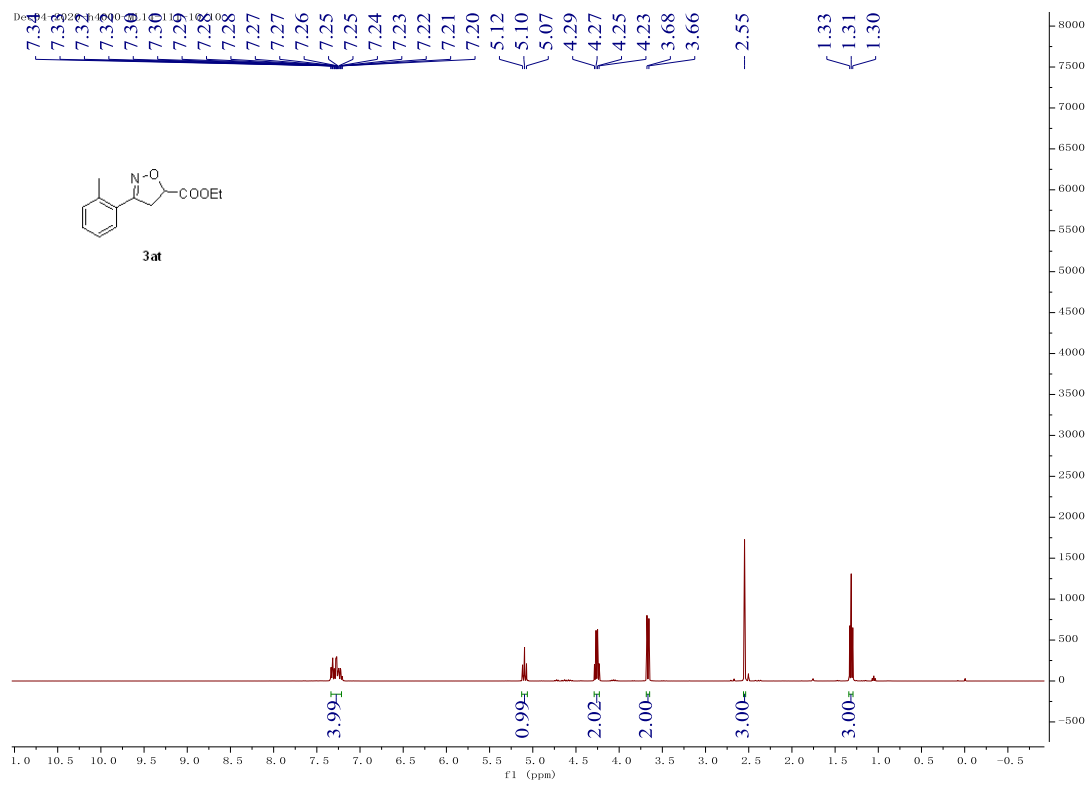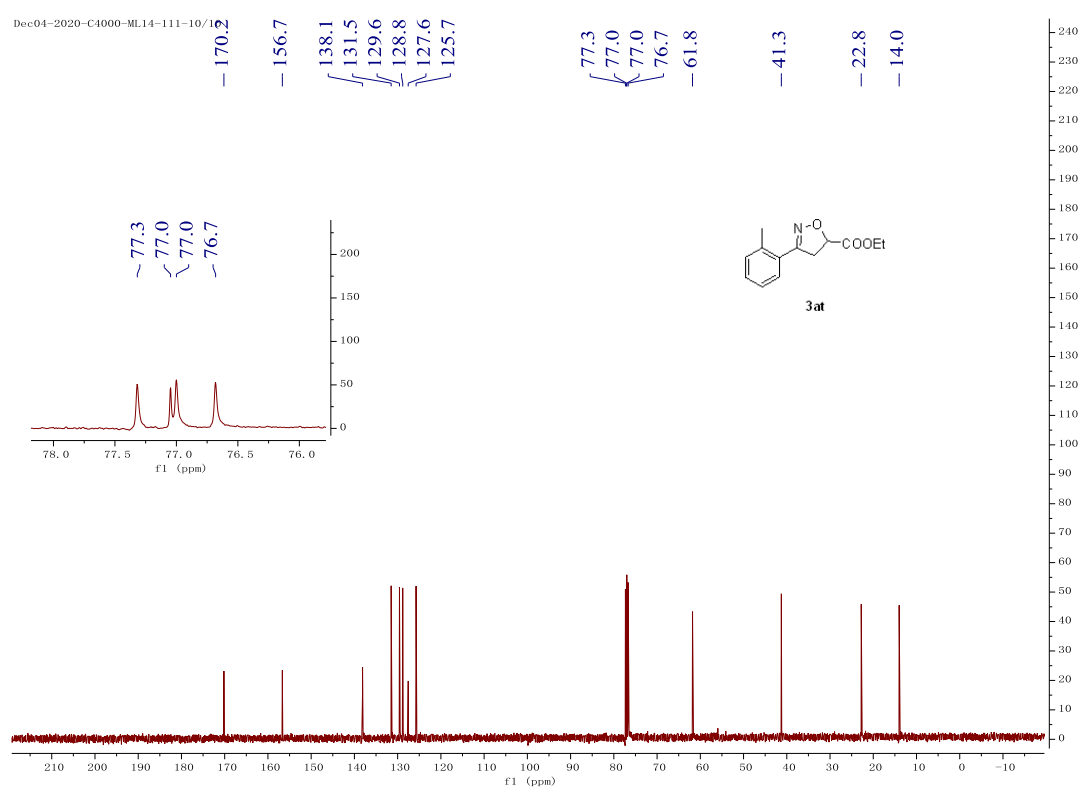

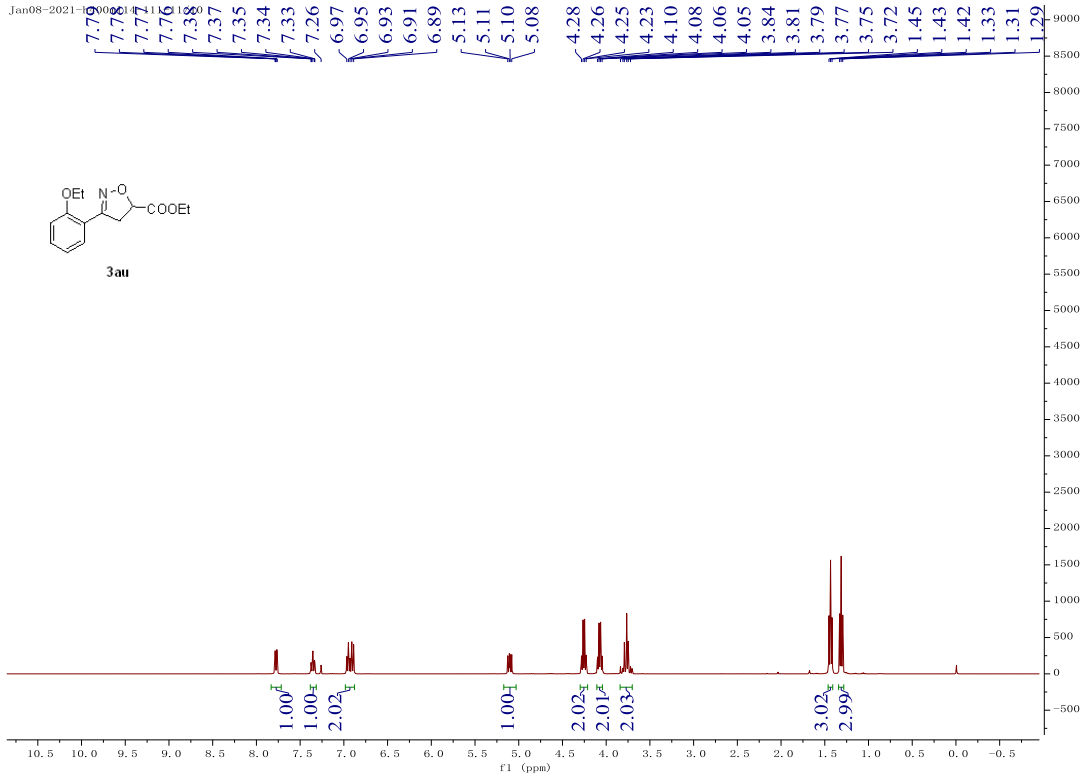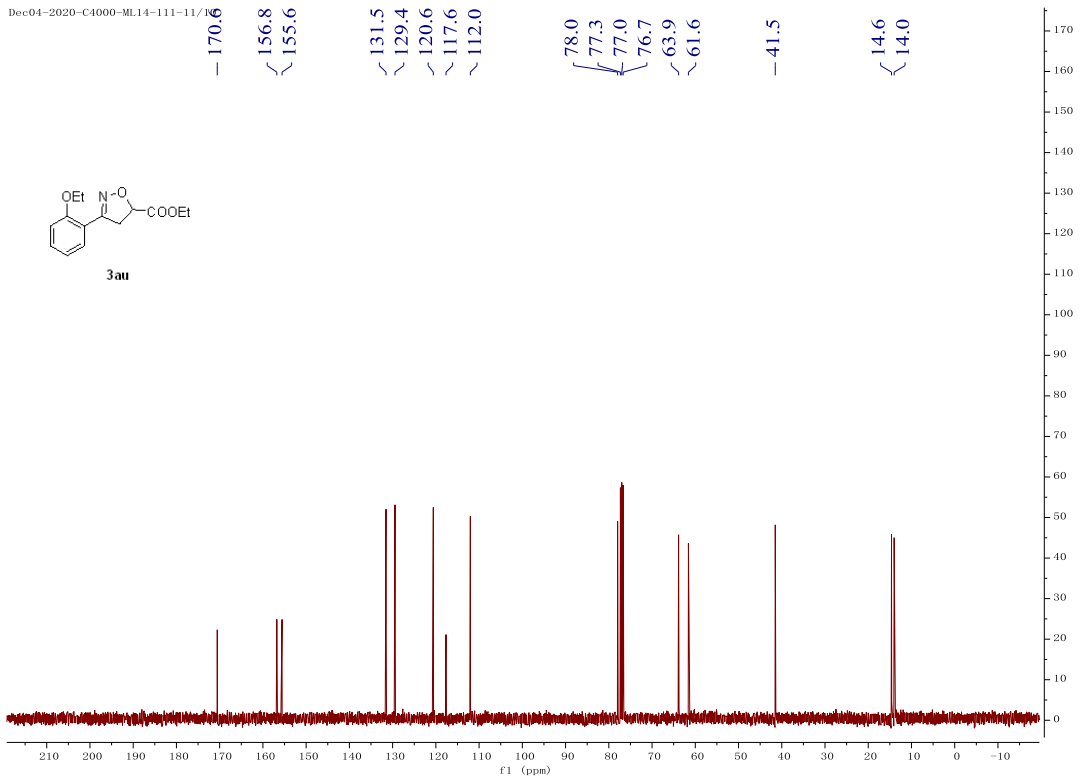

Dec-08-2020-H400-ML113

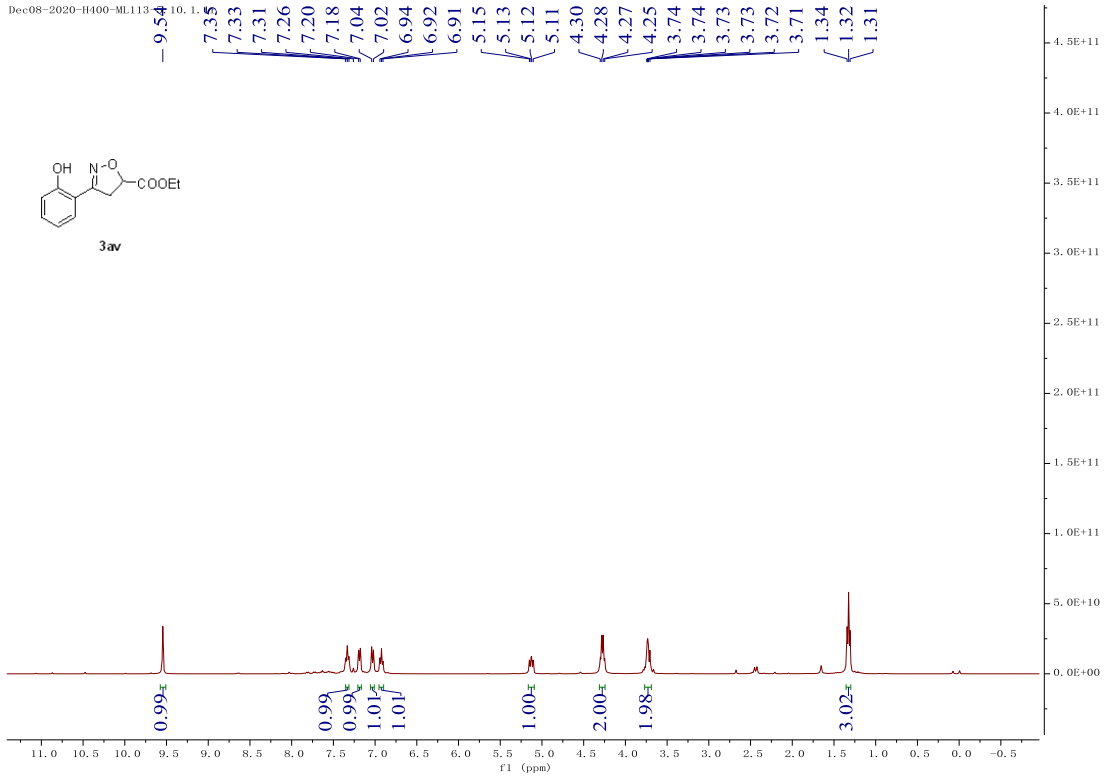

Dec-08-2020-C400-ML113-5.12.1.1

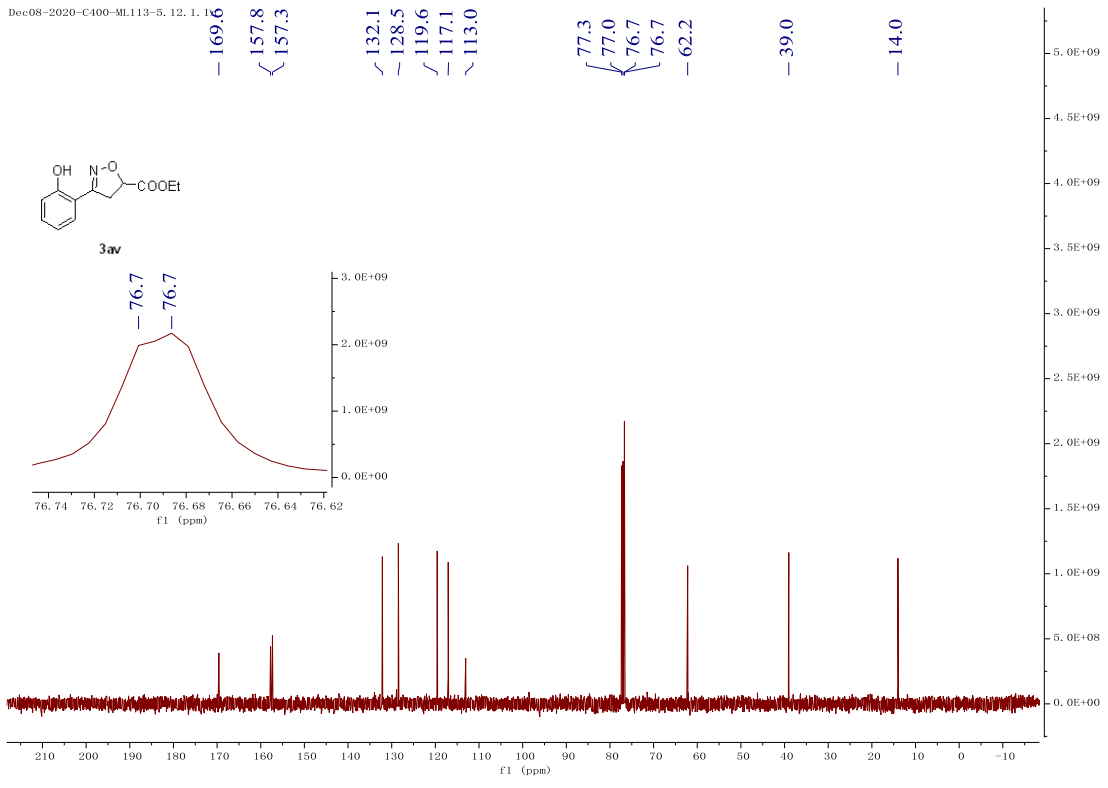

Dec08-2020-h400m1113-2/10

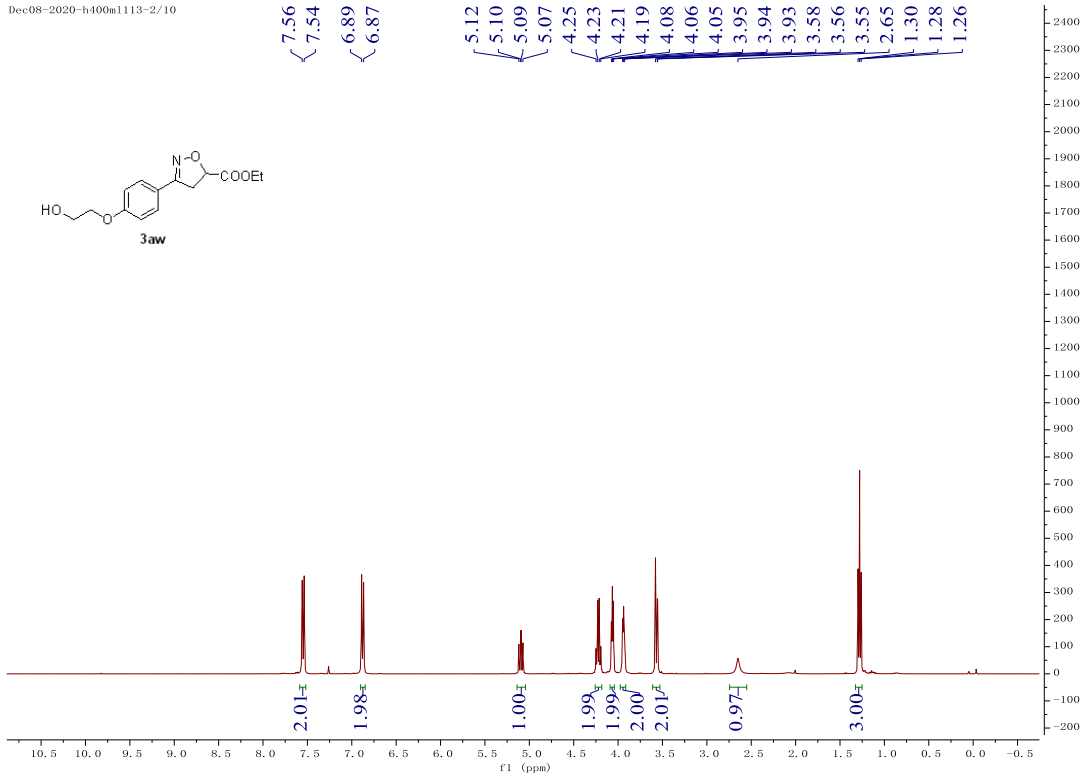

Dec08-2020-c400m1113-2/10

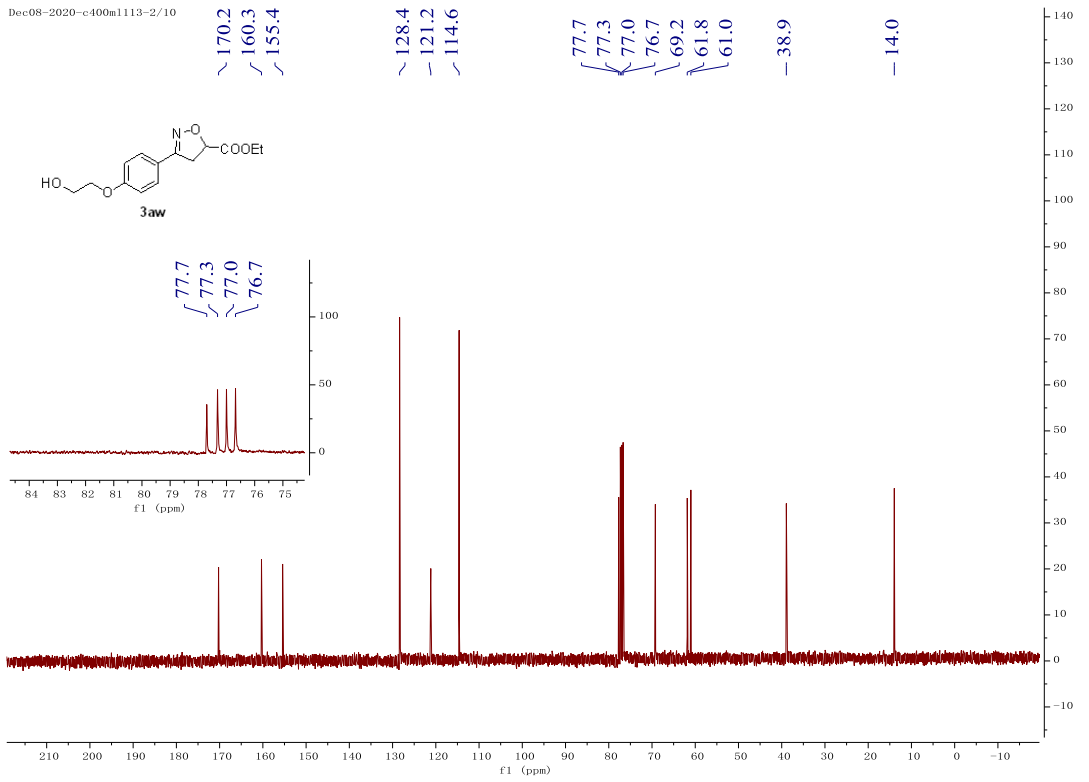

Dec04-2020-h4000-ML14

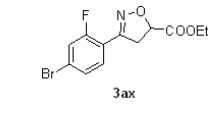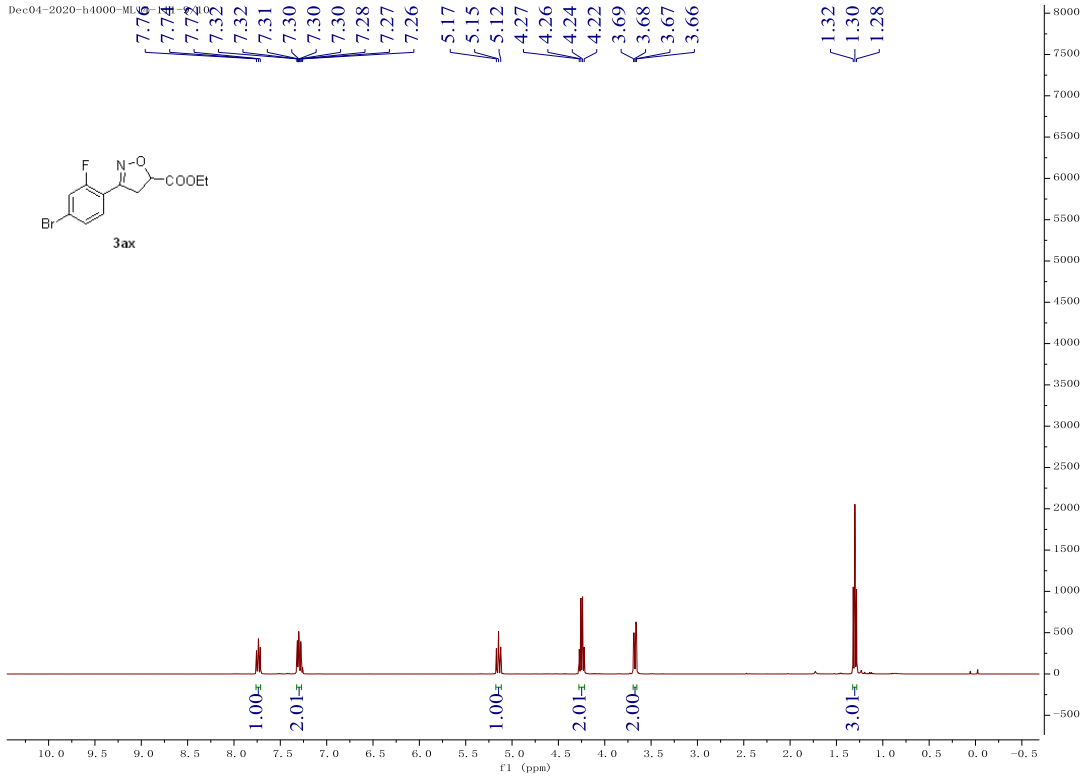

Dec04-2020-C4000-ML14

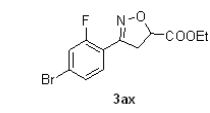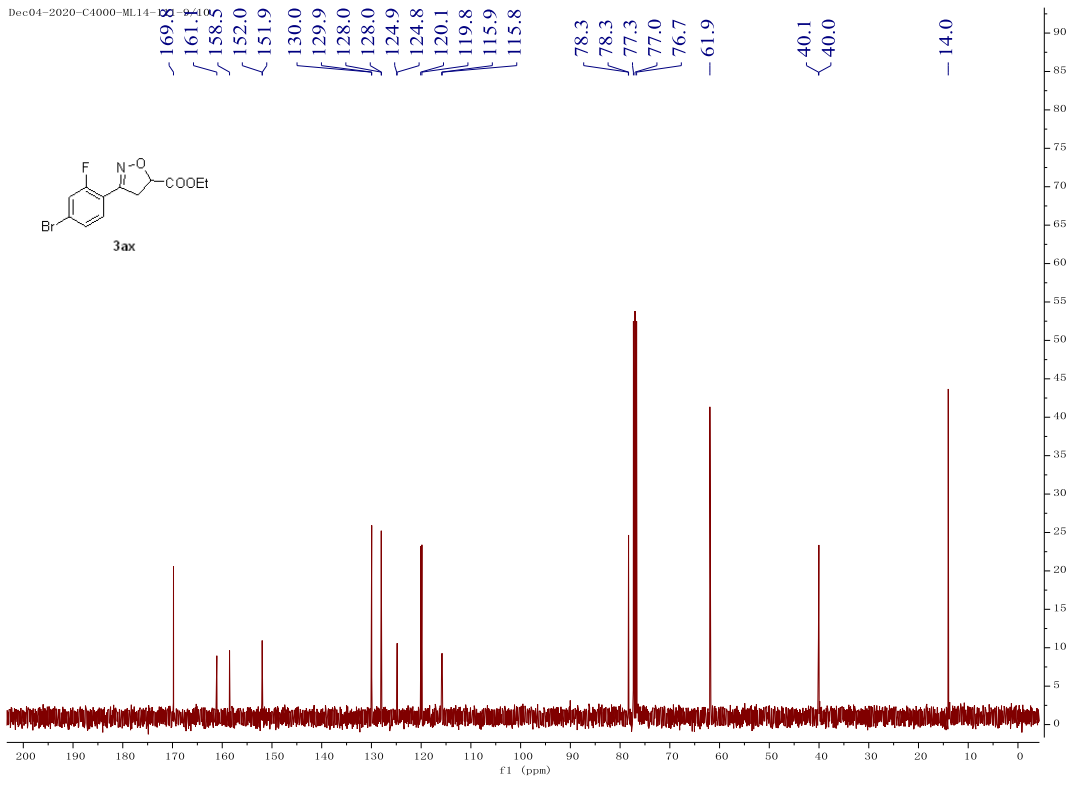

Dec08-2020-F400-ML14-111-9. 10. 1. 1r

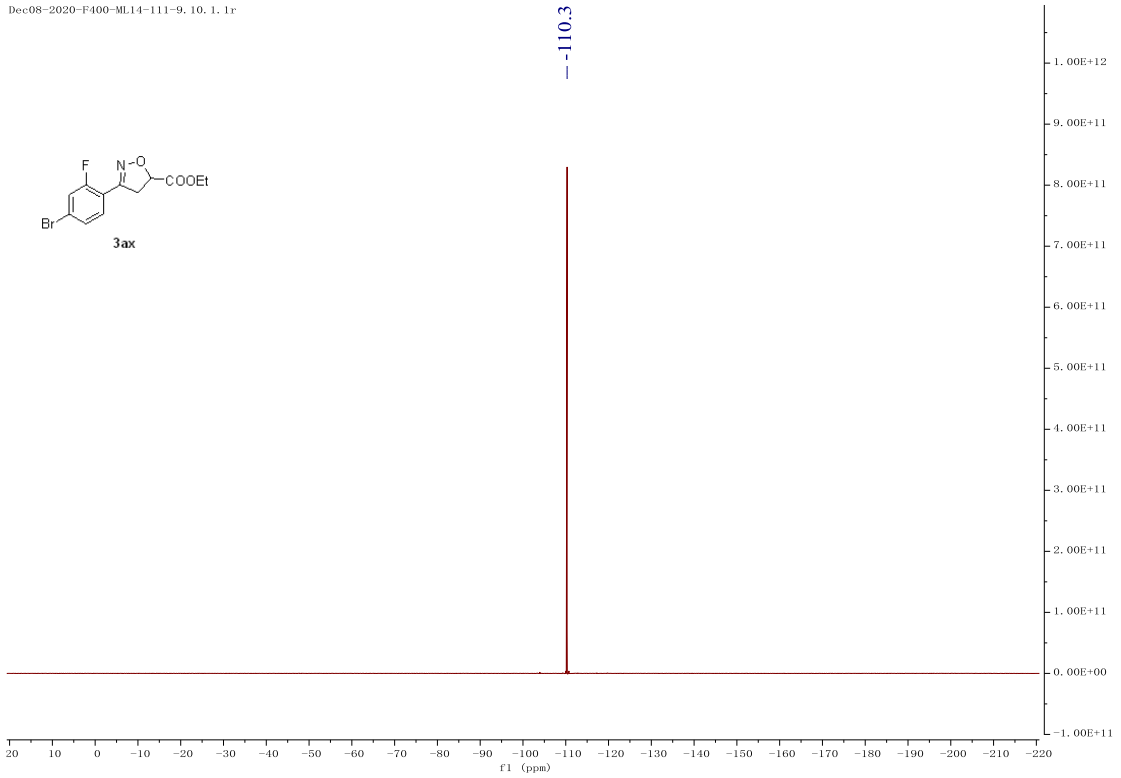

Jan12-2021-h400ml14-463-9/10

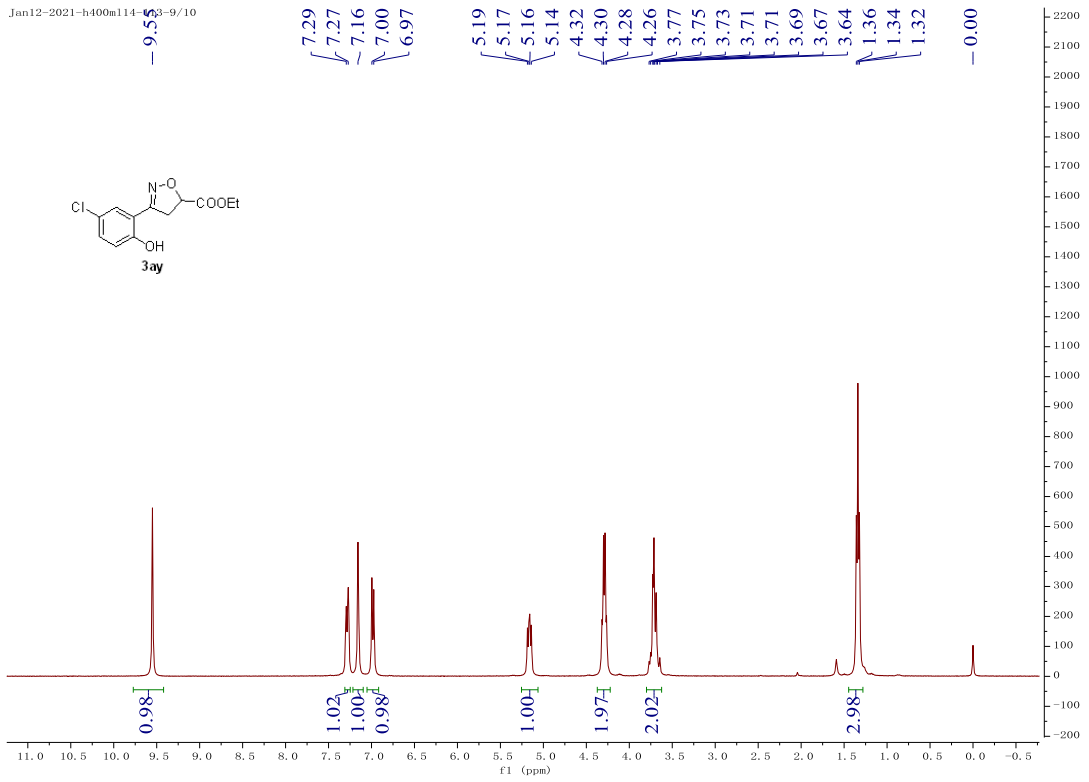

Jan12-2021-c100m114-113-9/

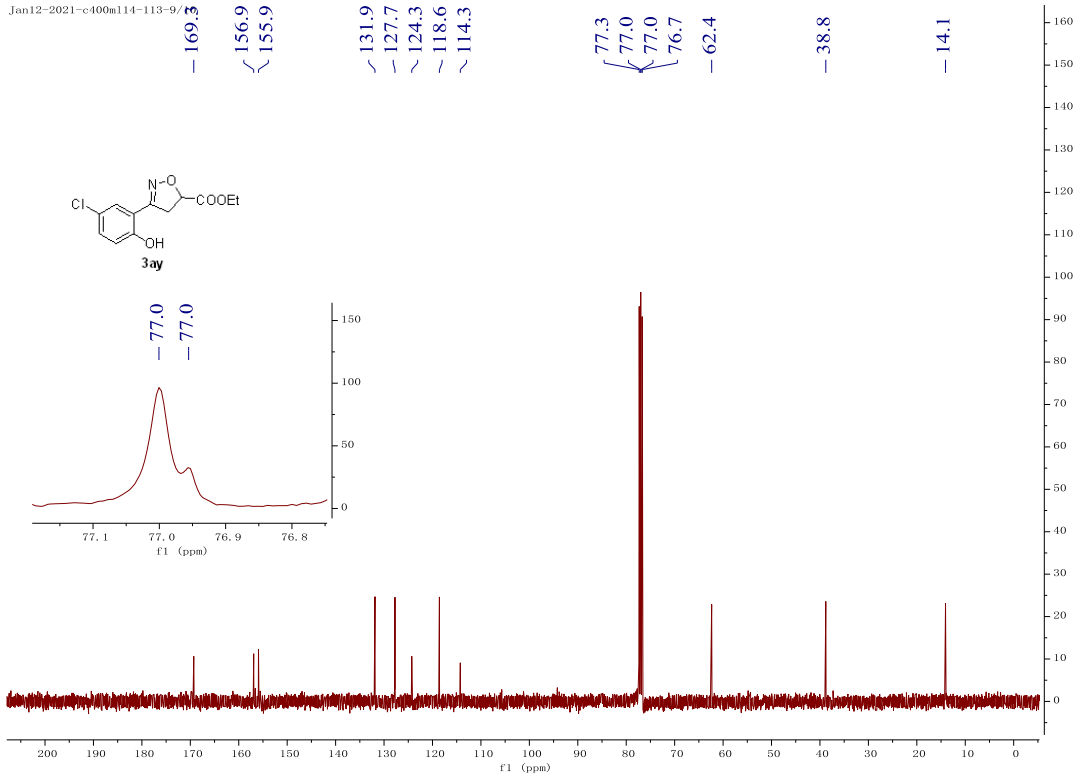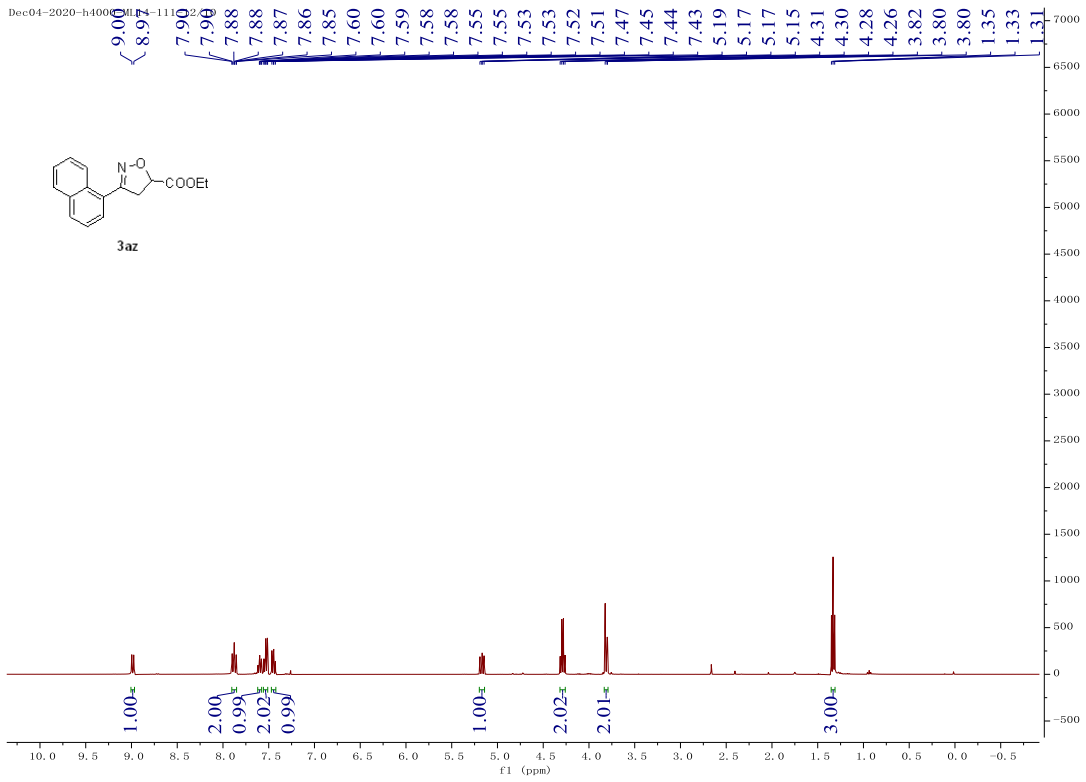

Dec04-2020-C4000-ML14-111-12/1

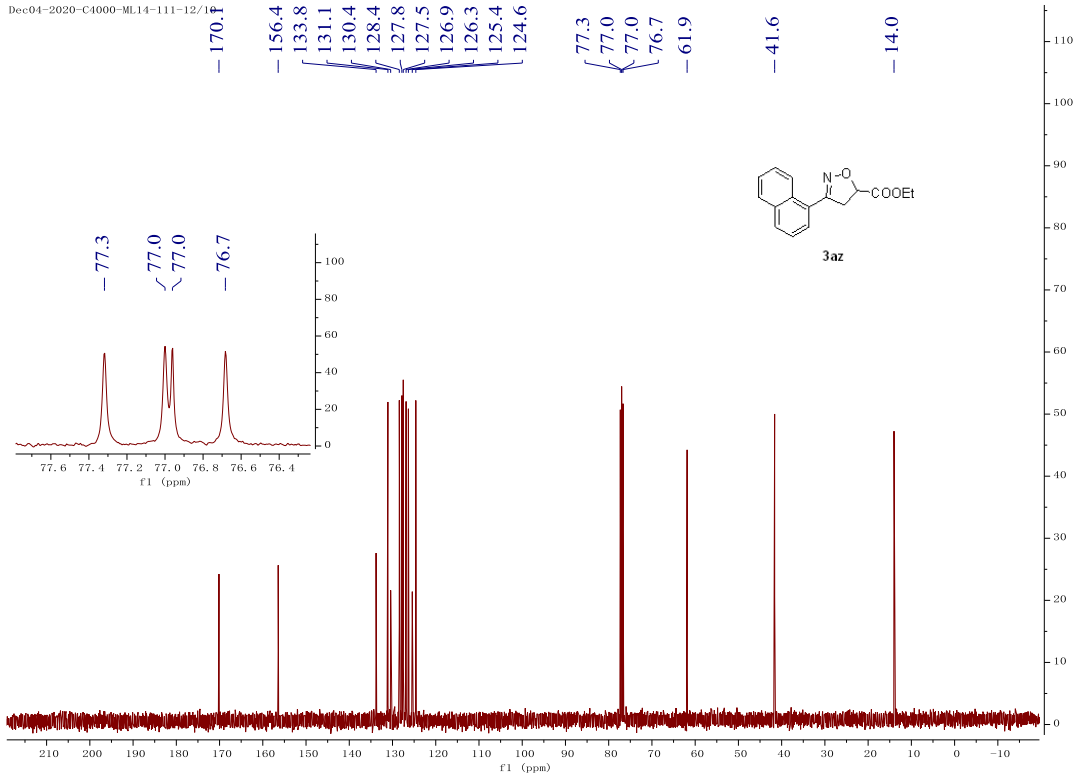

Dec04-2020-H400ml14-111-8-2.10.1.1r

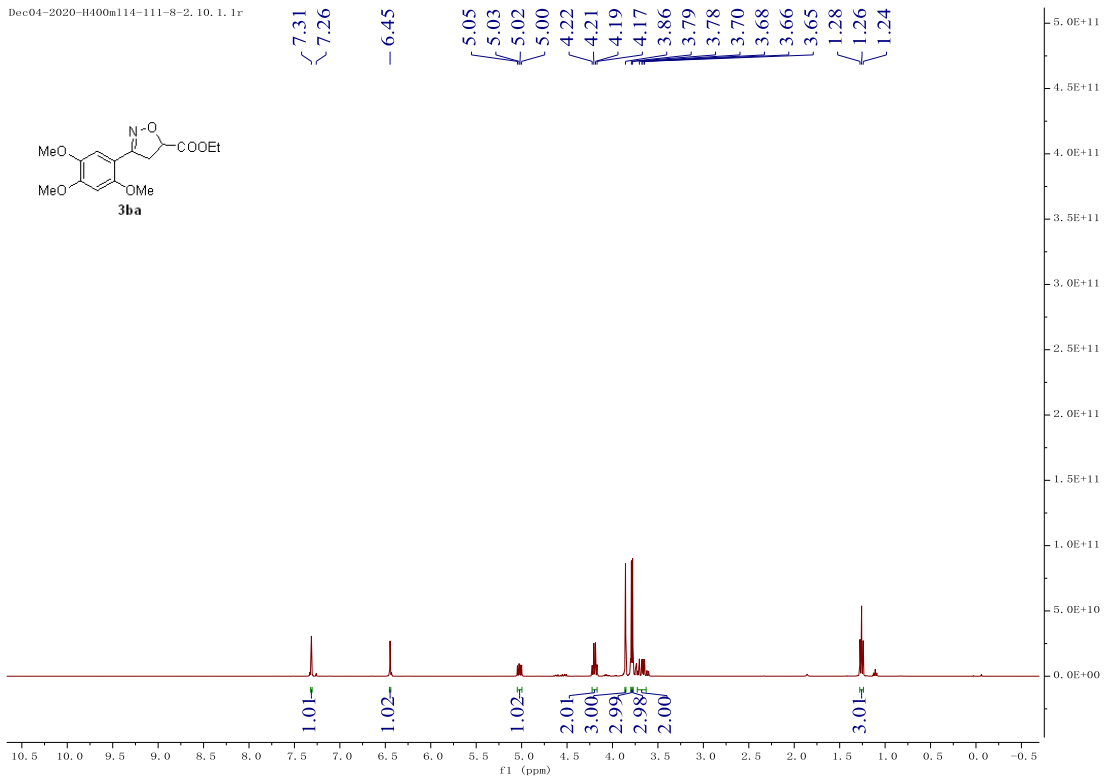



Dec04-2020-c100m114-111-8-2-1871\_1r

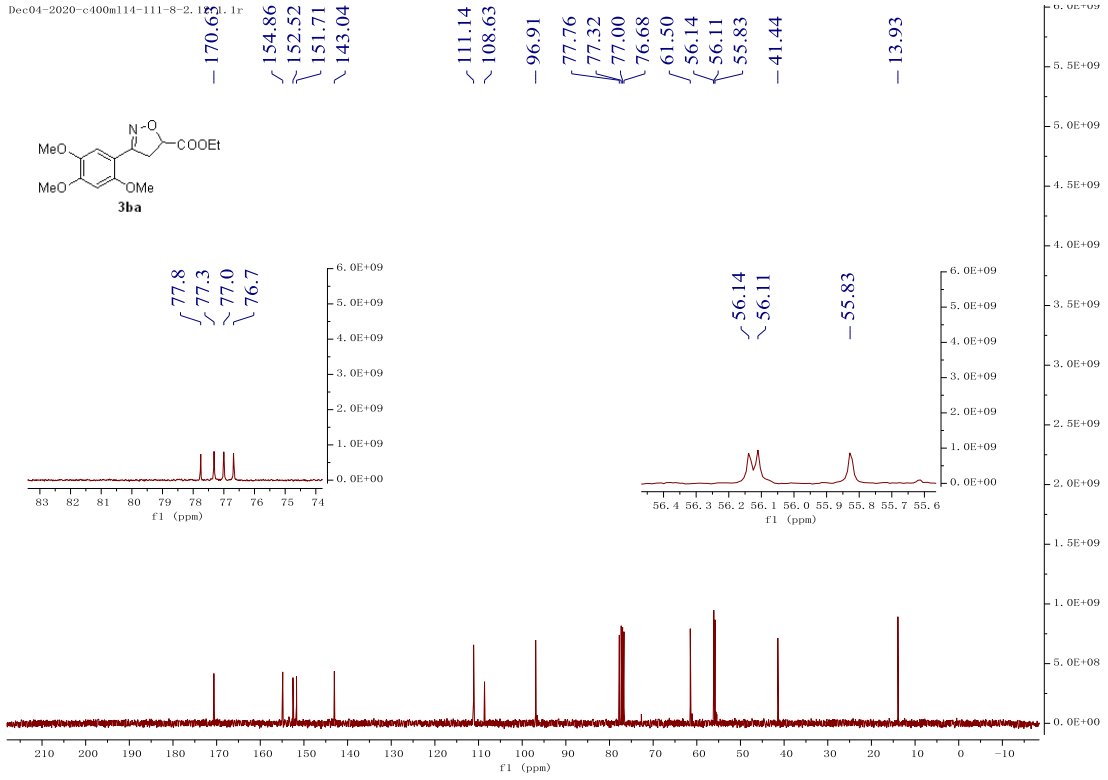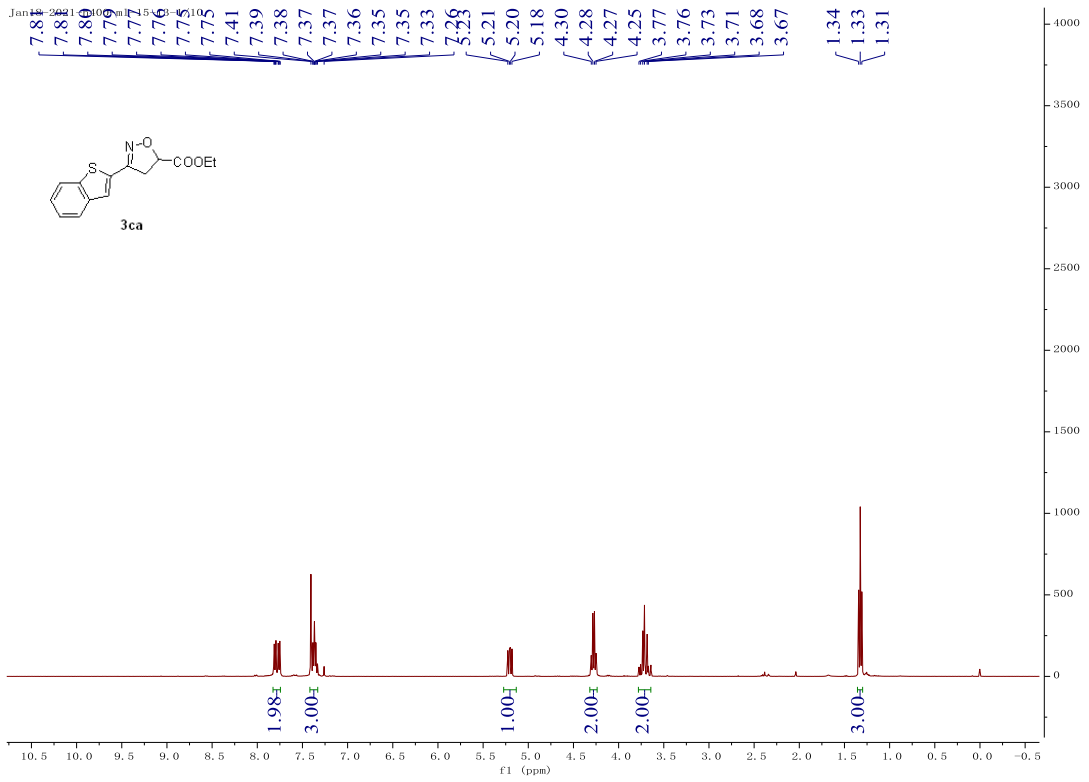

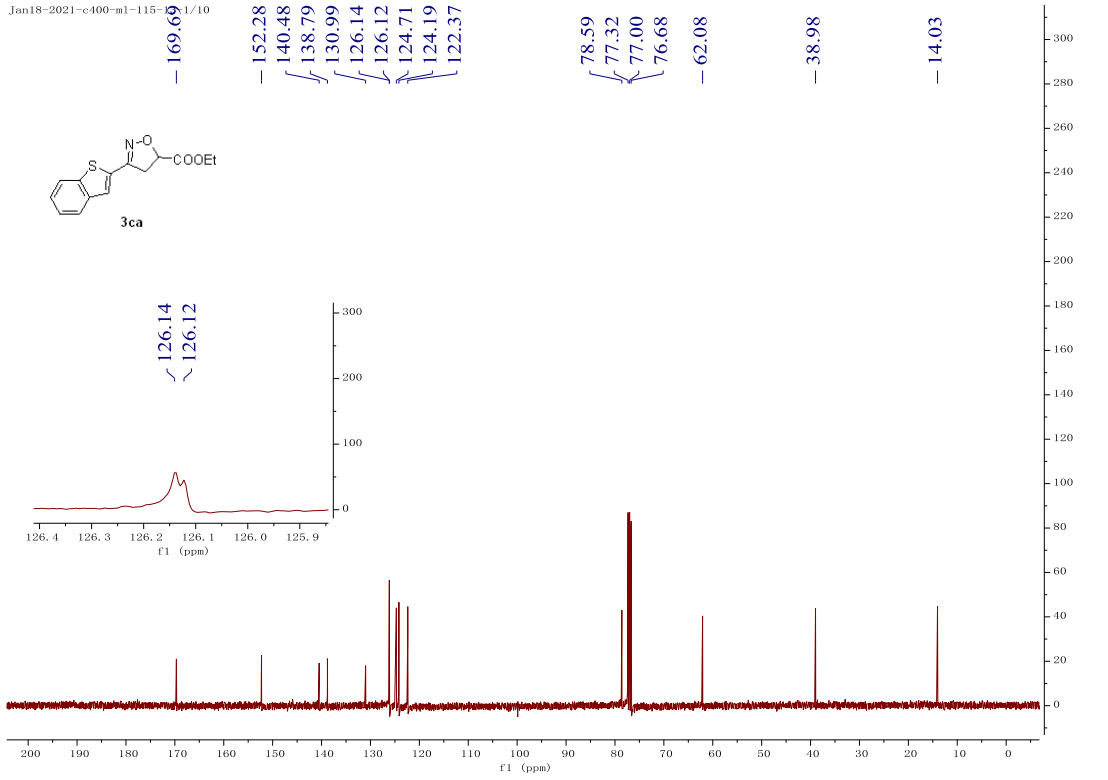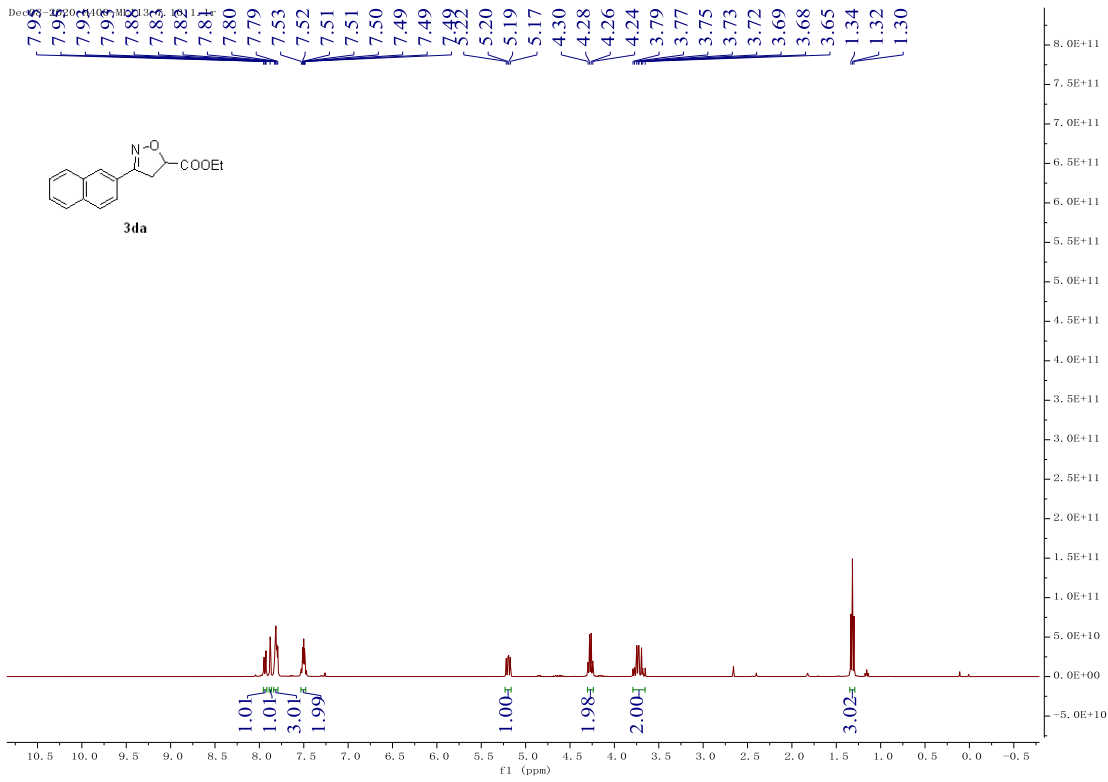

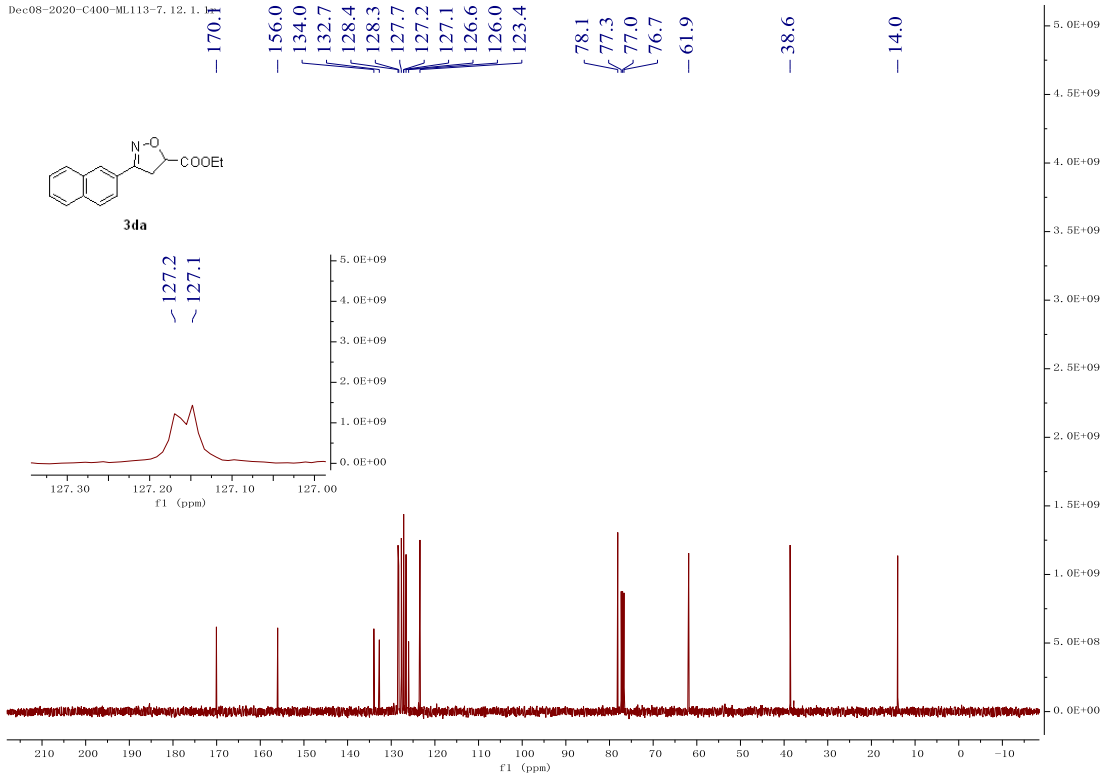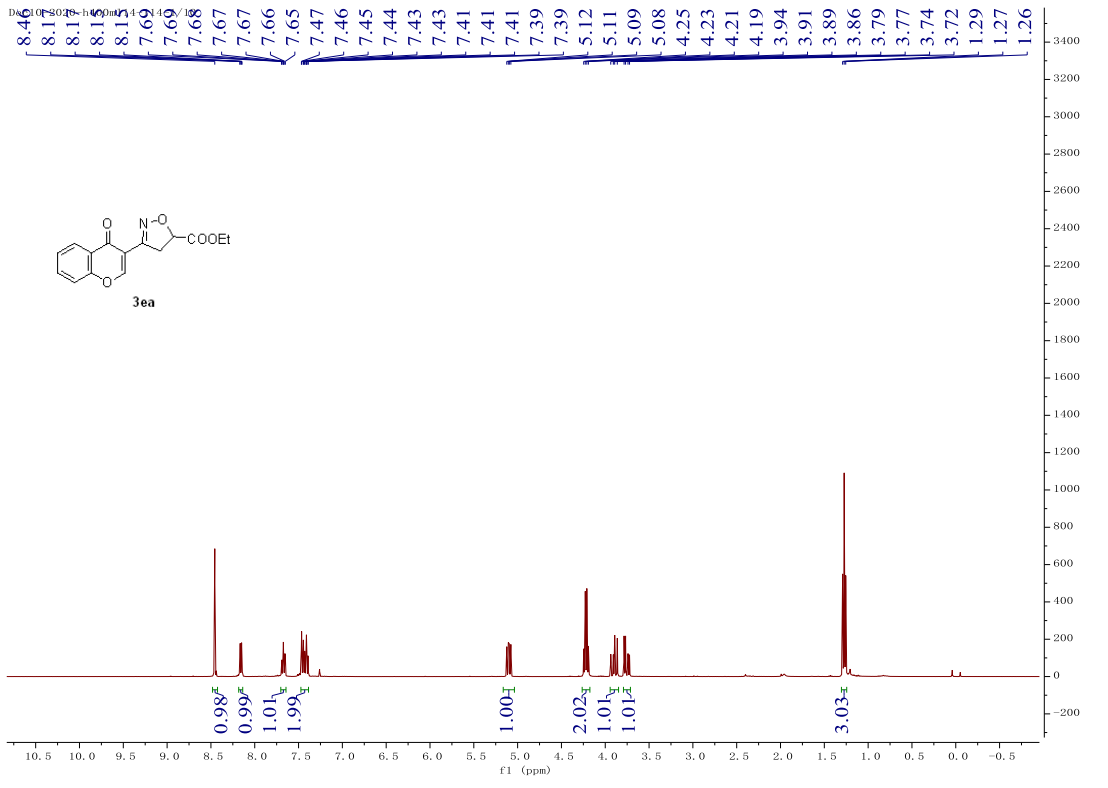

Dec10-2020-e400a114-114-1/1

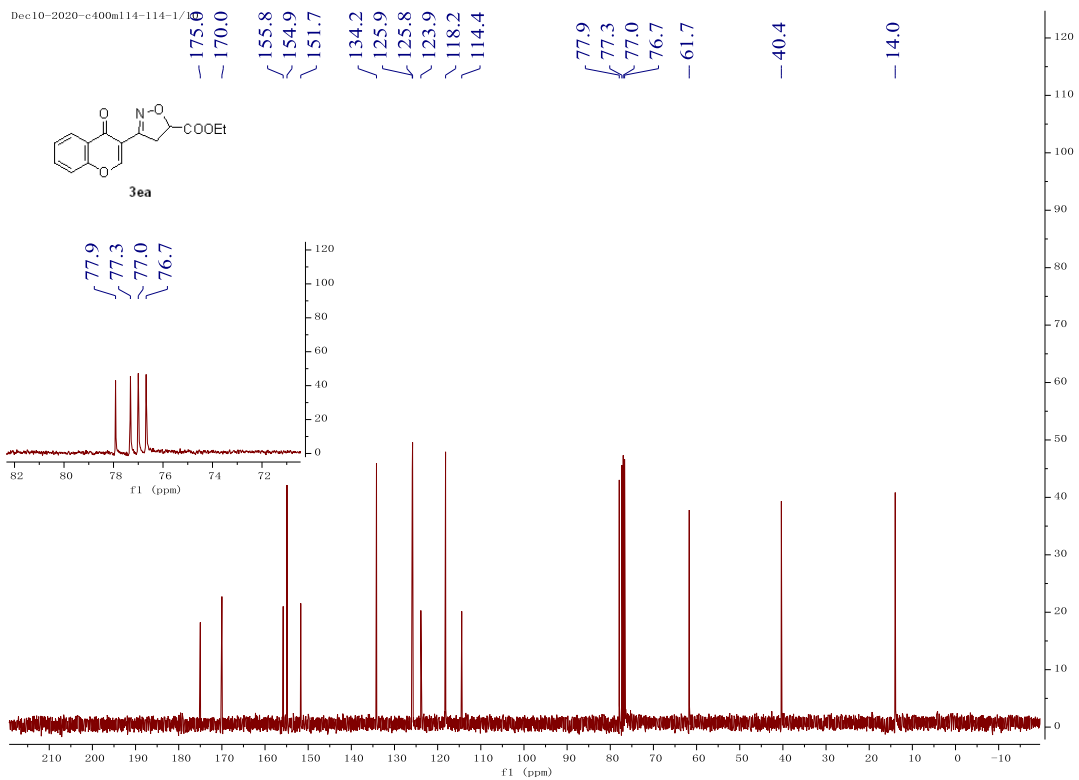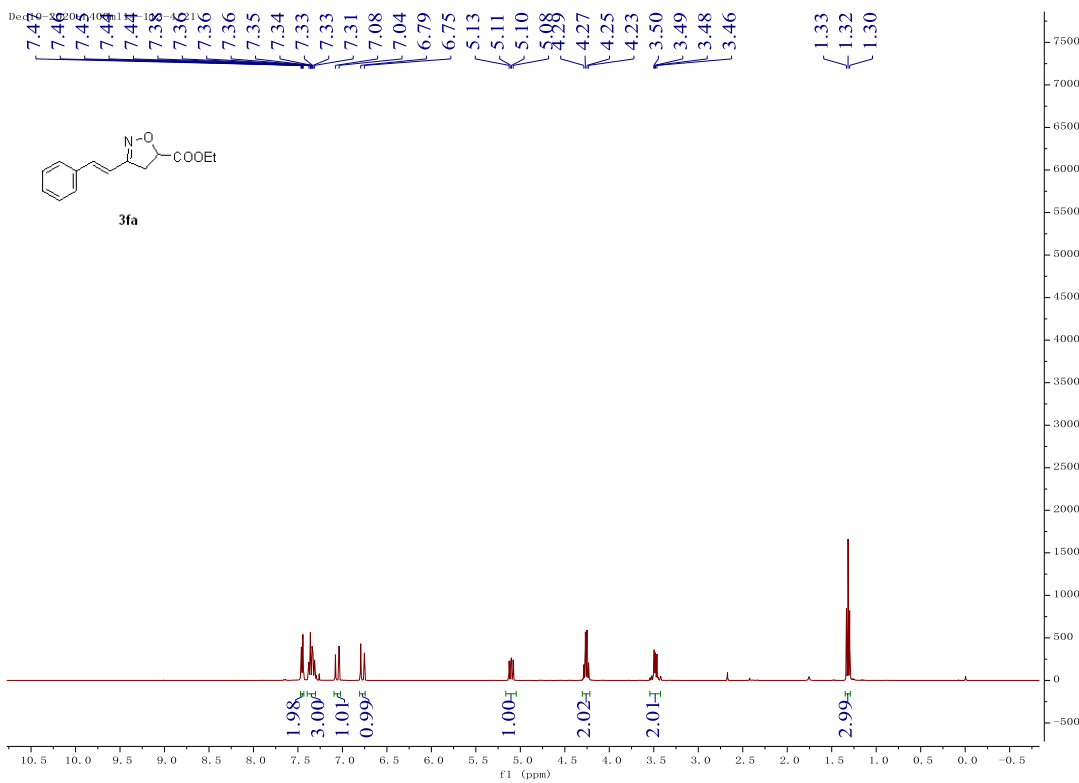

Dec10-2020-c400m114-113

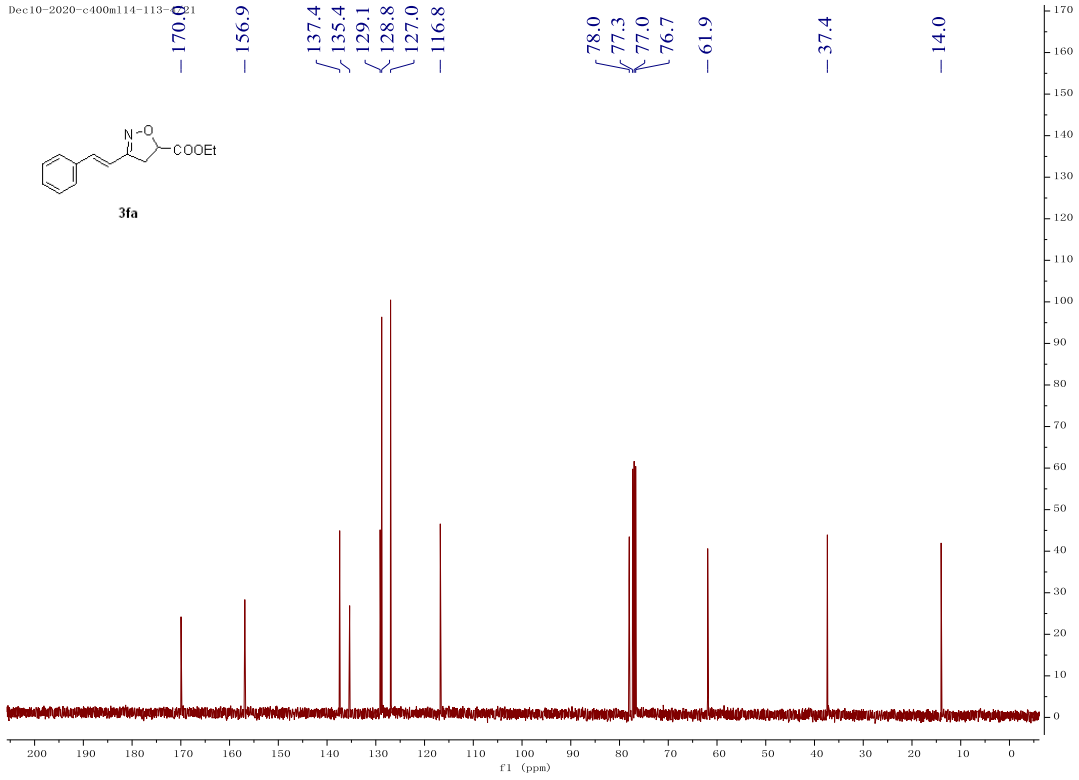

Jan13-2021-h400m114-113

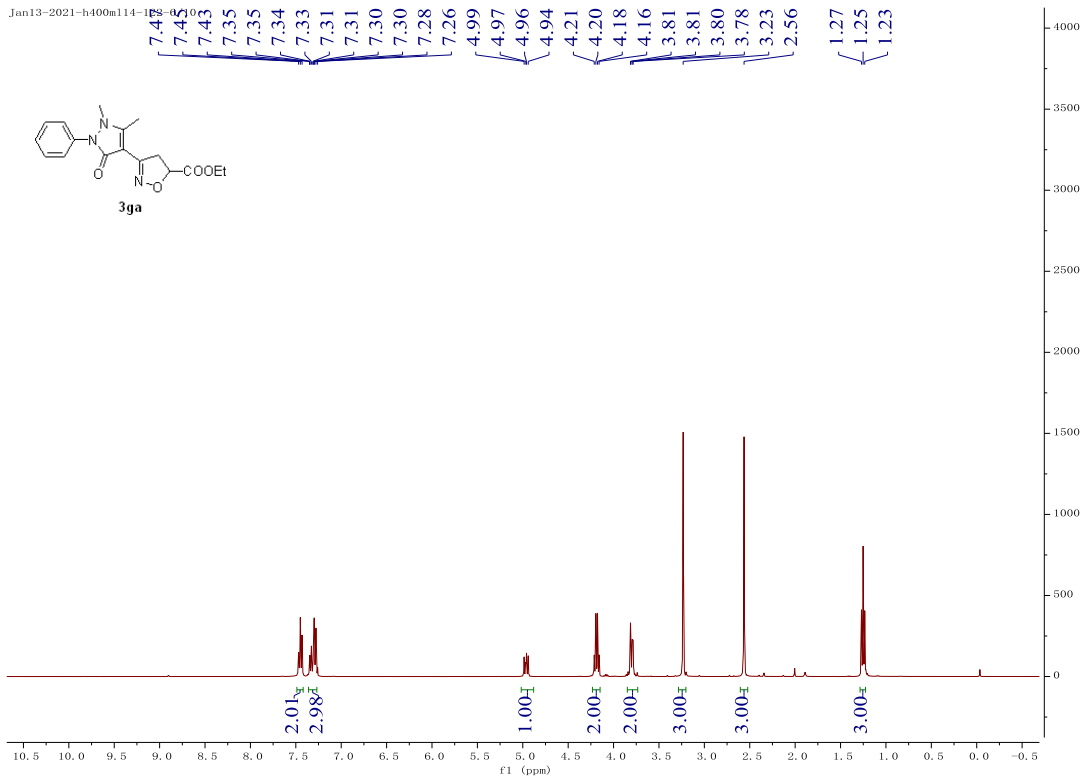

Jan13-2021-c400m114-1226/10

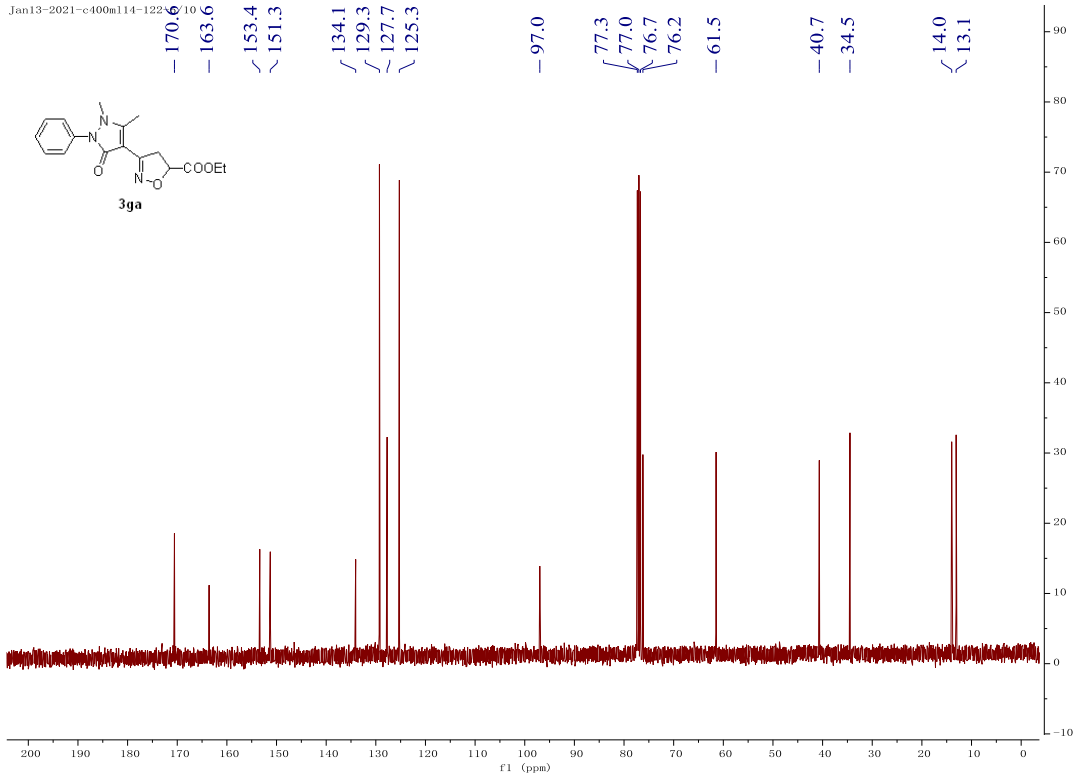

Mar05-2021-h400-ML15-49-2/10

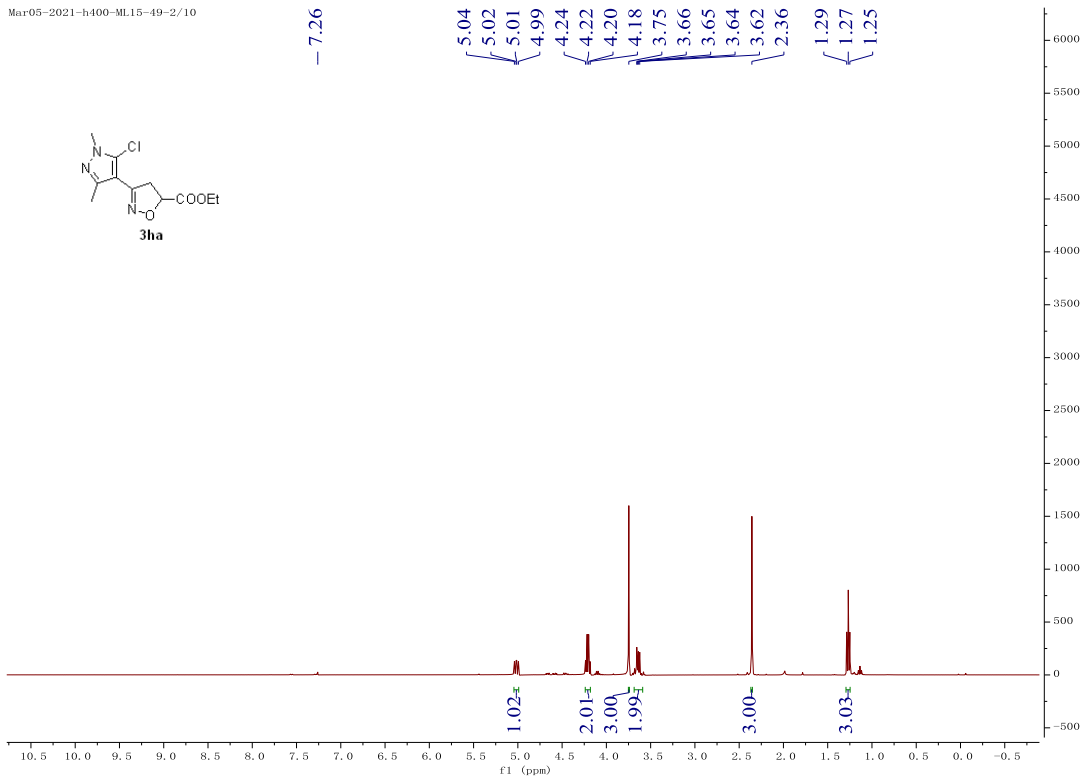

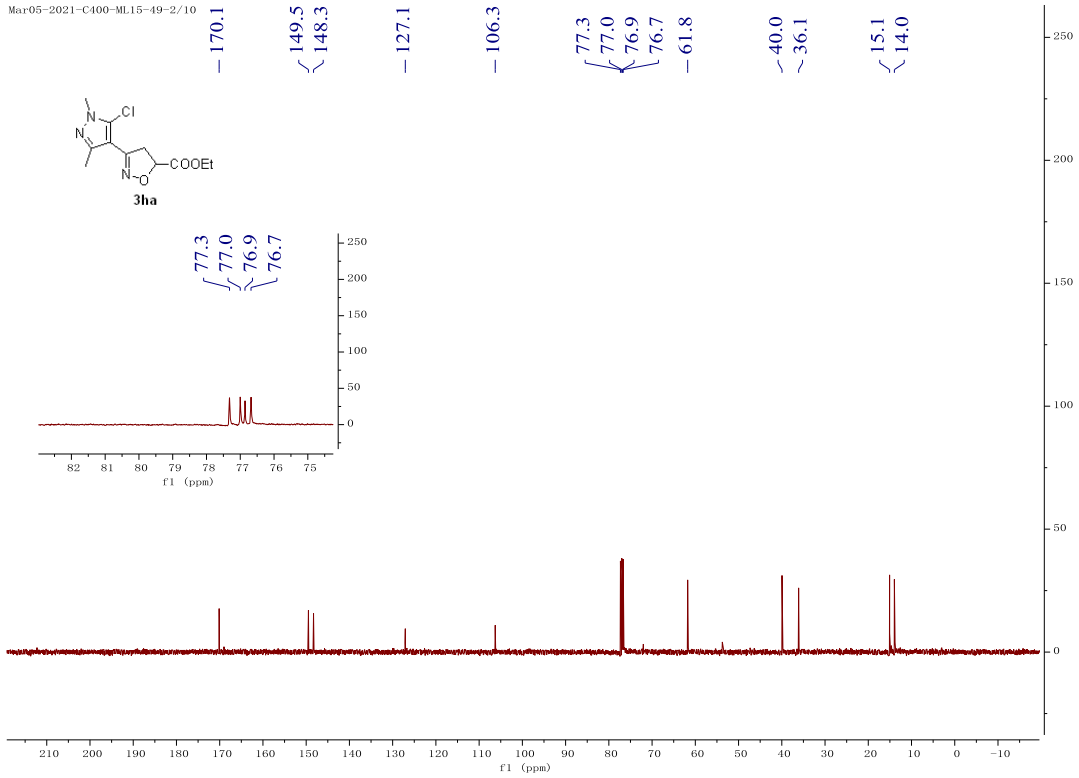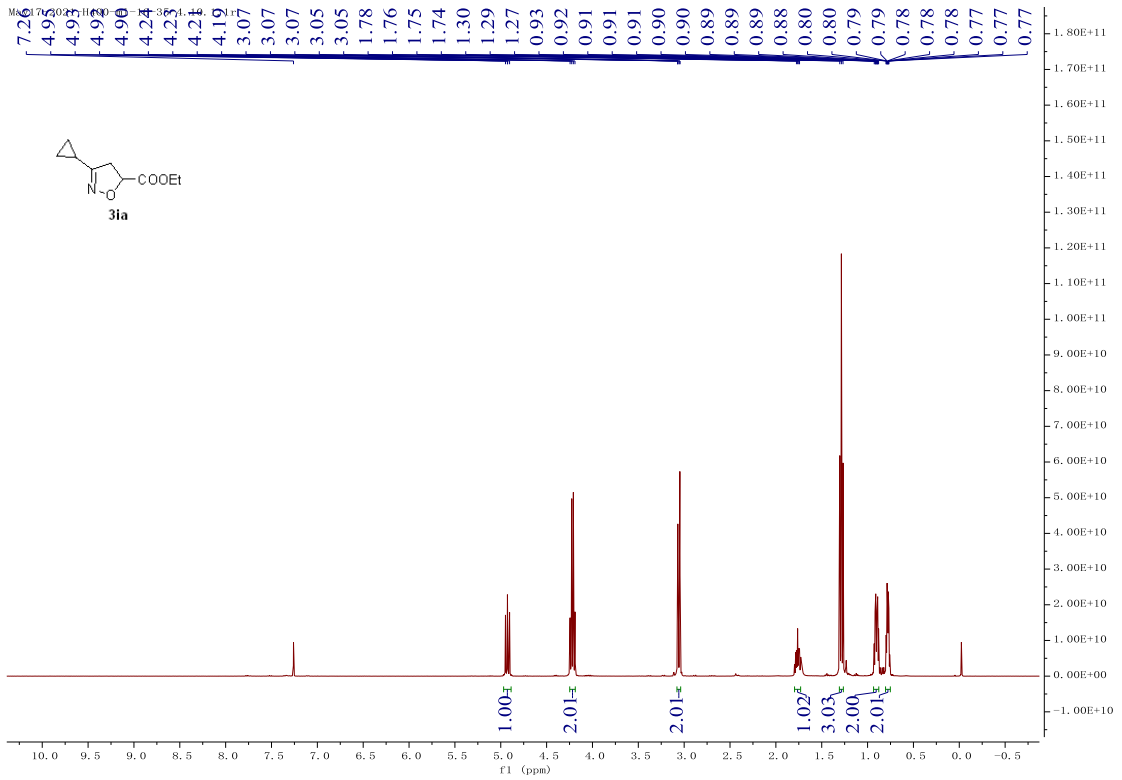

May17-2021-c100-m1-16-358.12.17

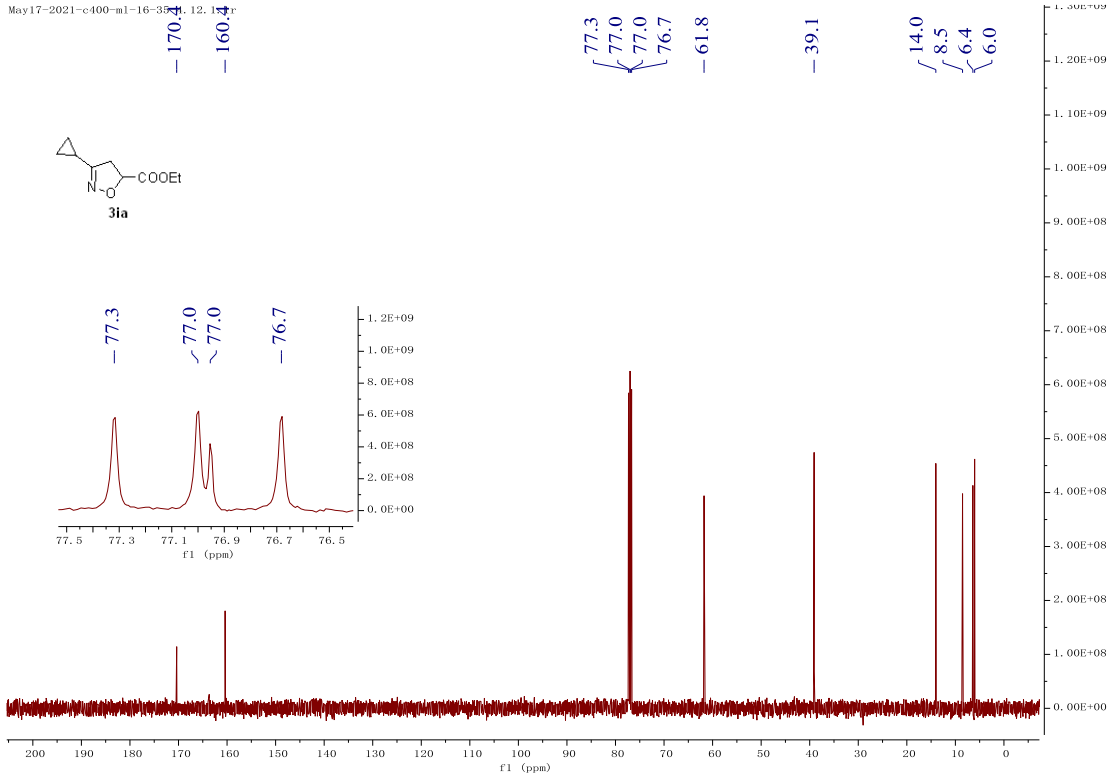

Jan05-2021-h400m114-117-7/10

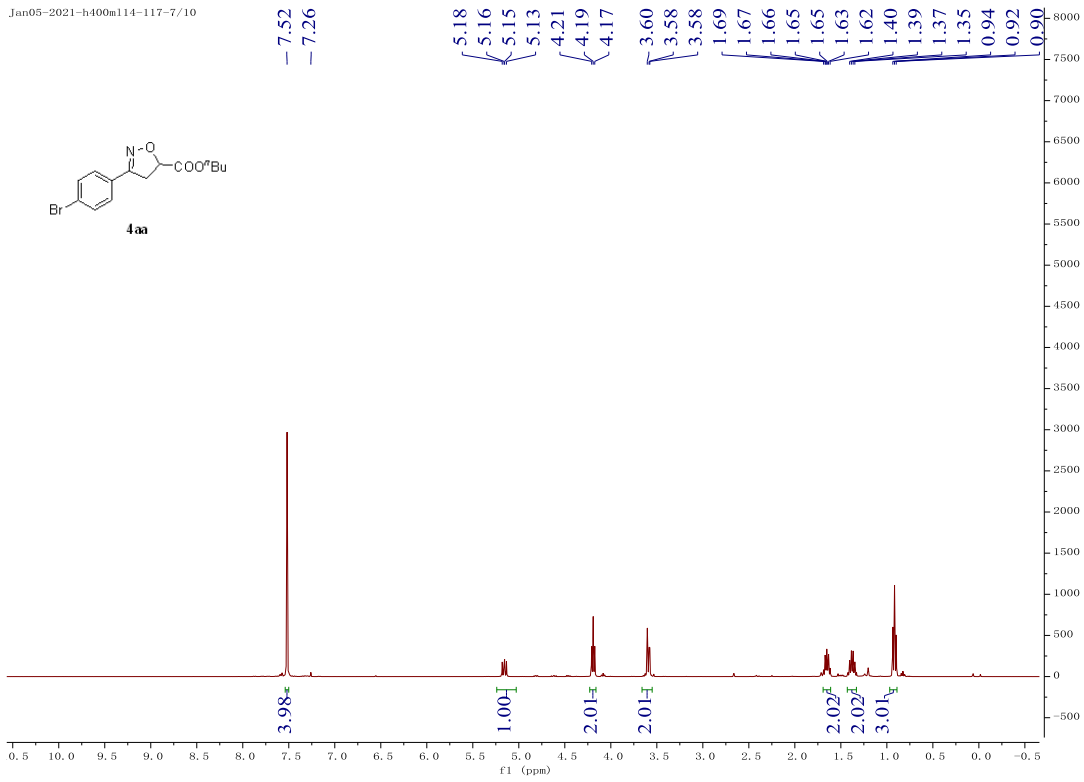



Jan05-2021-c-100m114-117-7/10

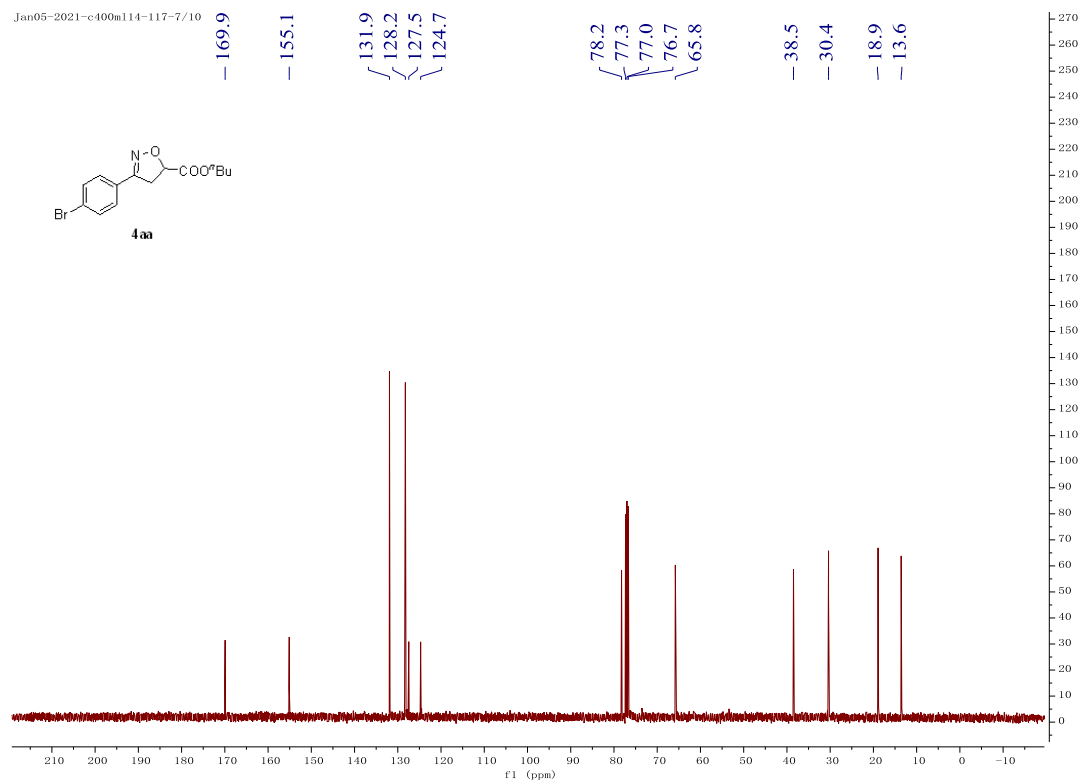

Dec11-2020-h400-ML117-8/30

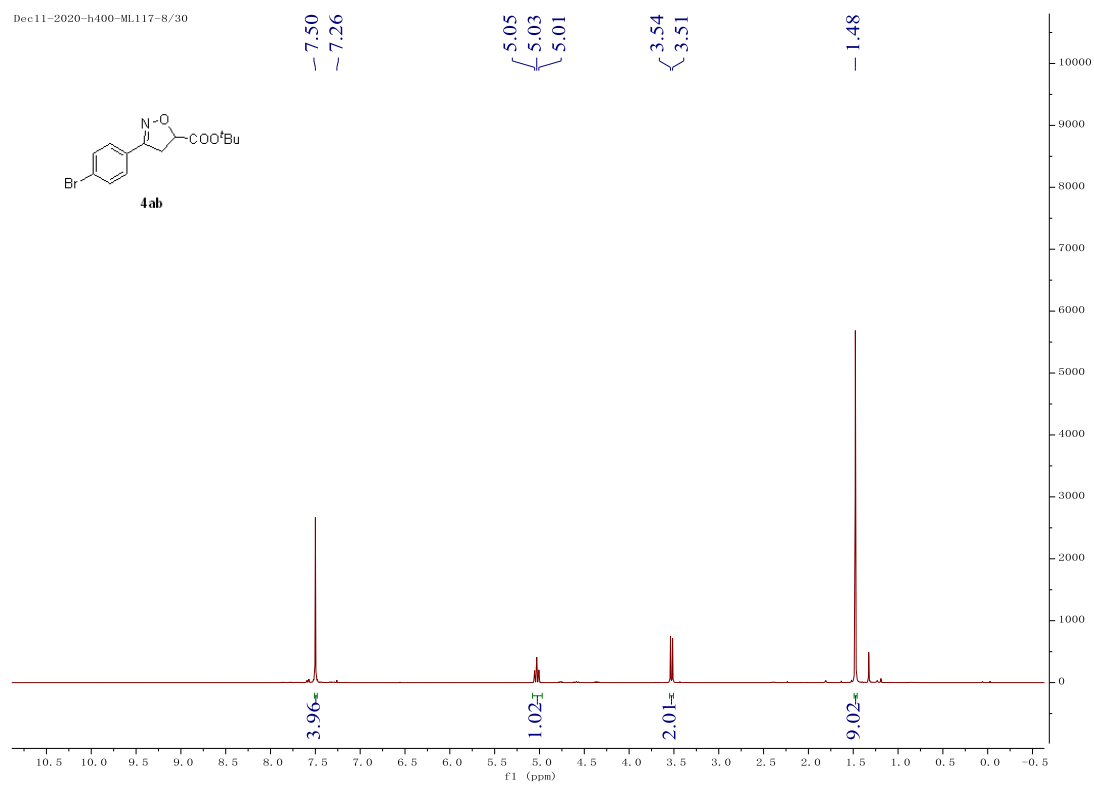

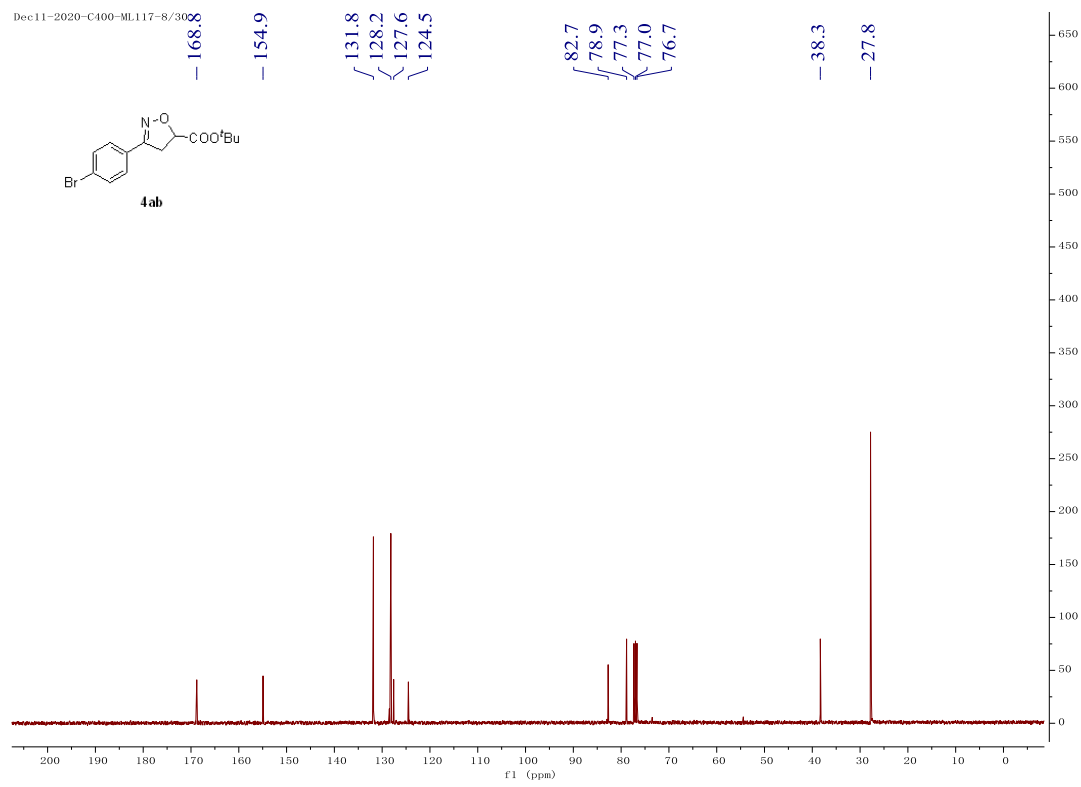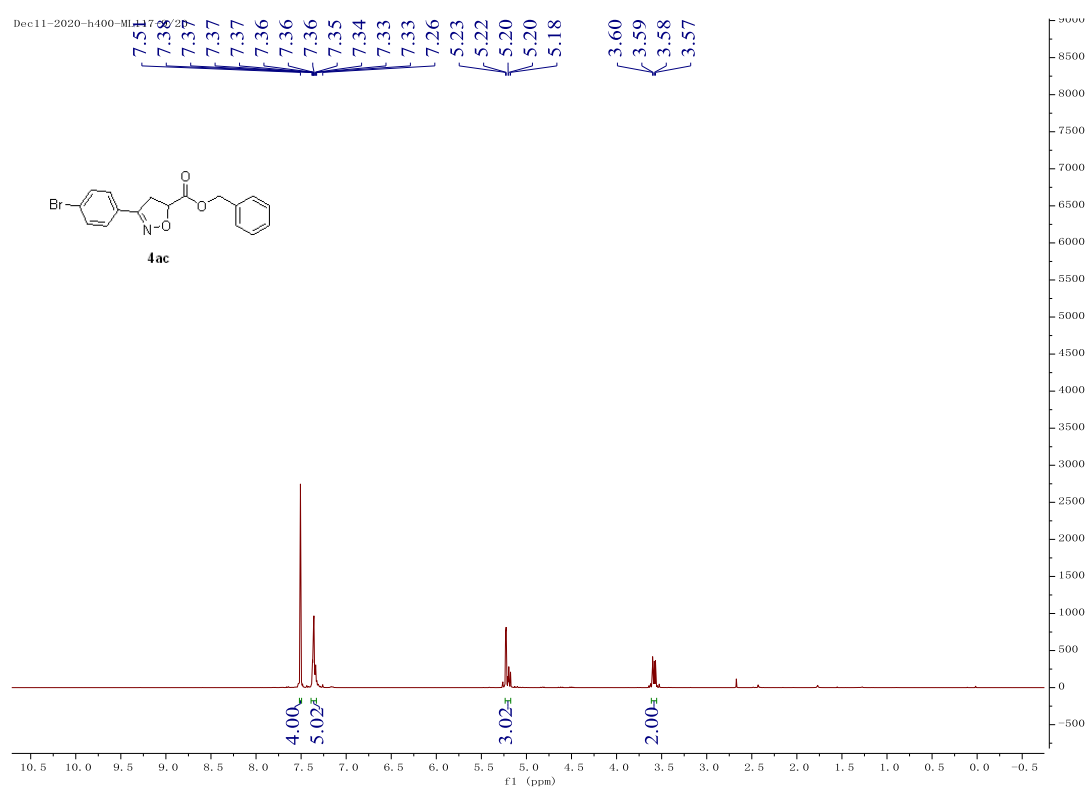

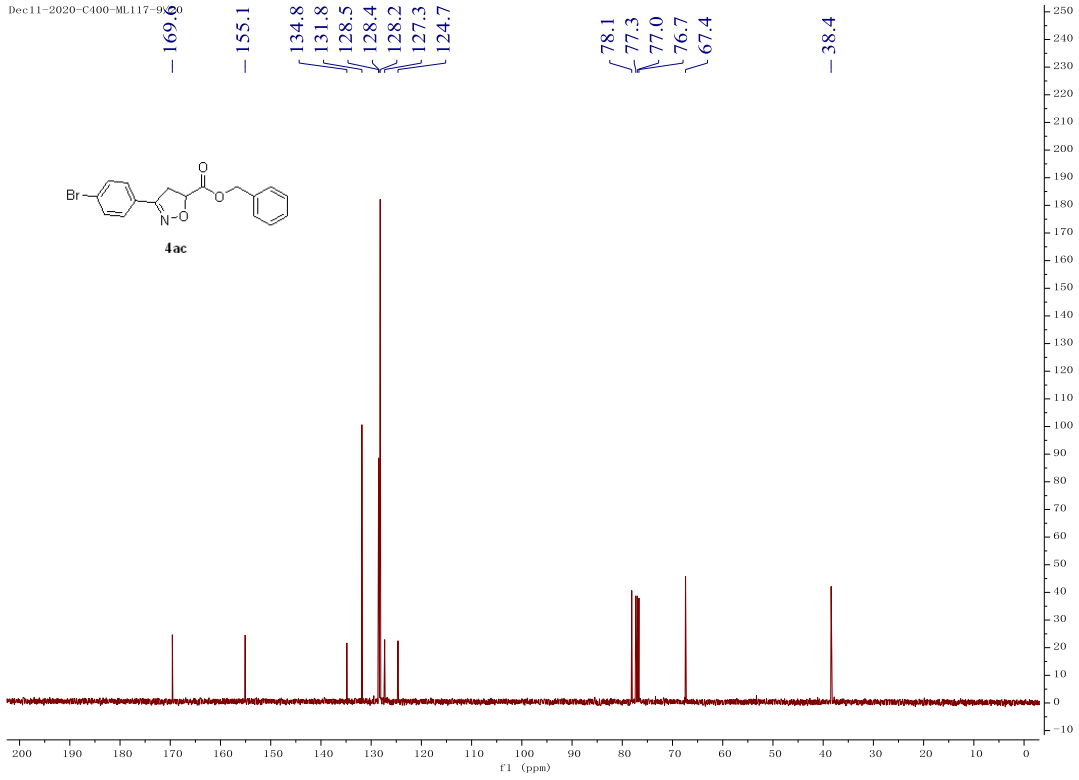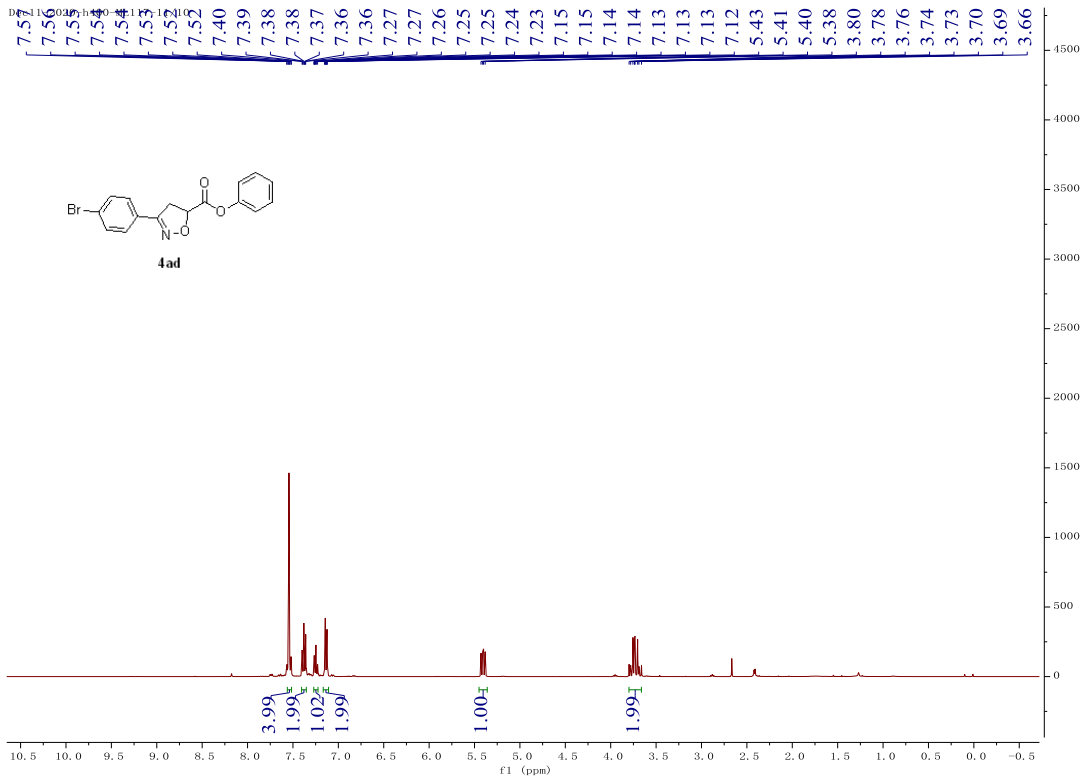

Dec18-2020-C400-ML117-11/10

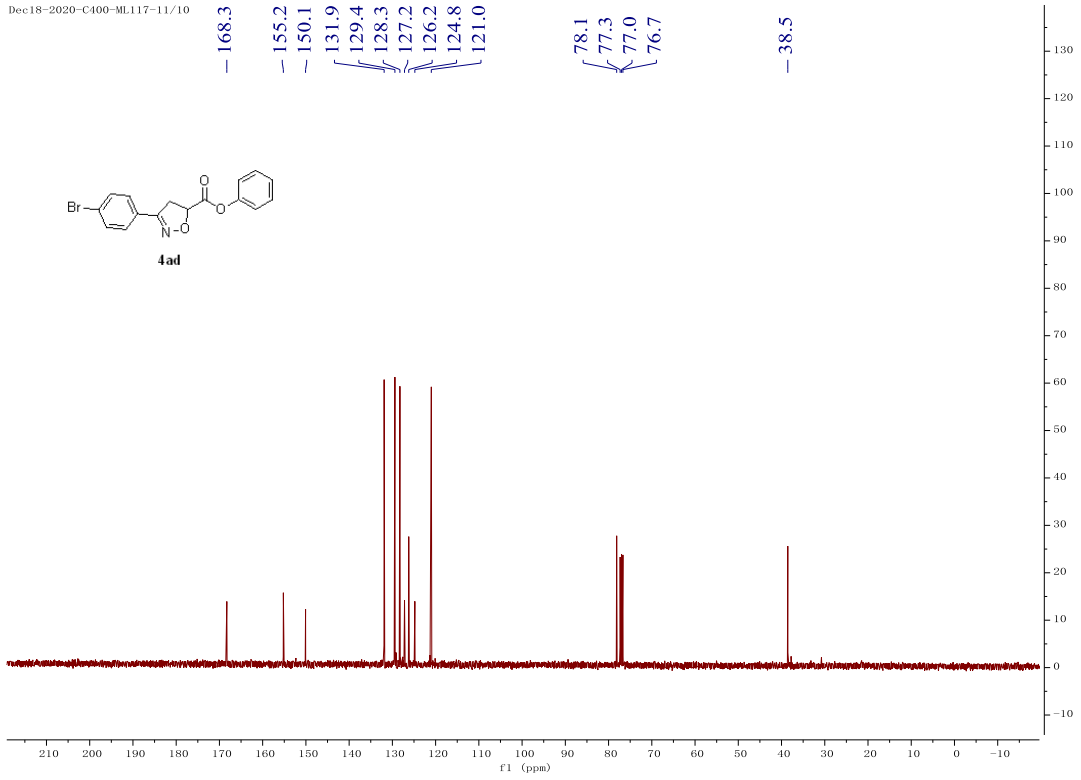

Jan08-2021-h400m114-117-10/10

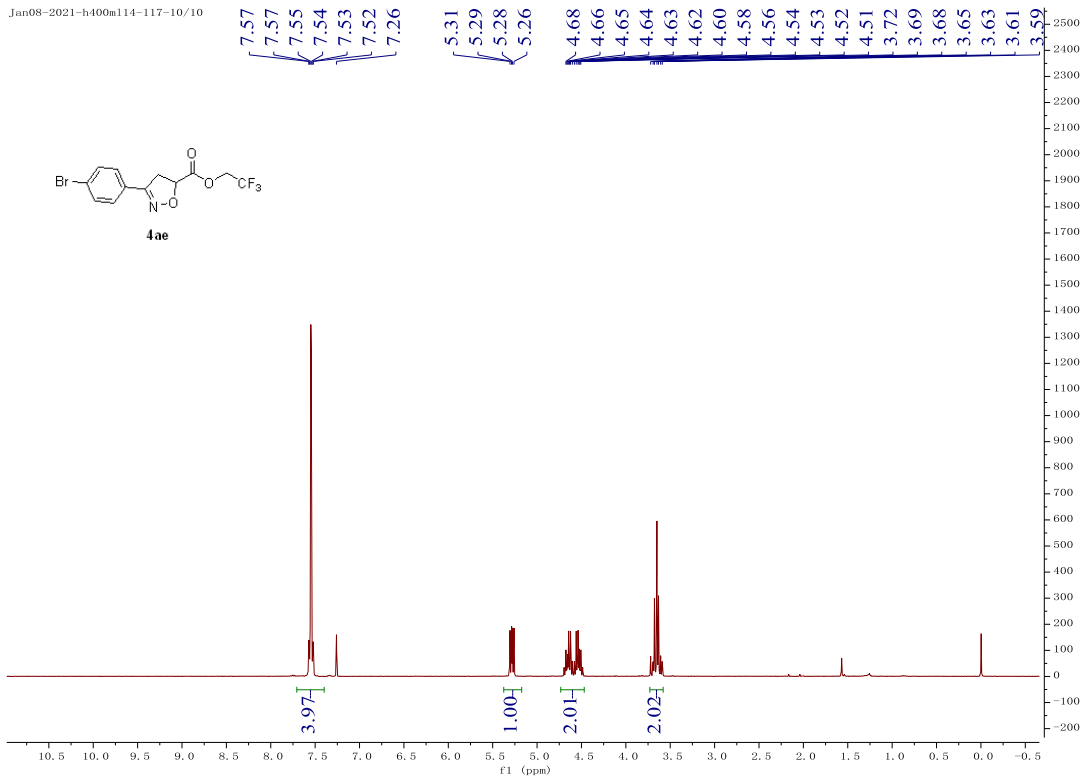

Jan08-2021-c400m114-117-10

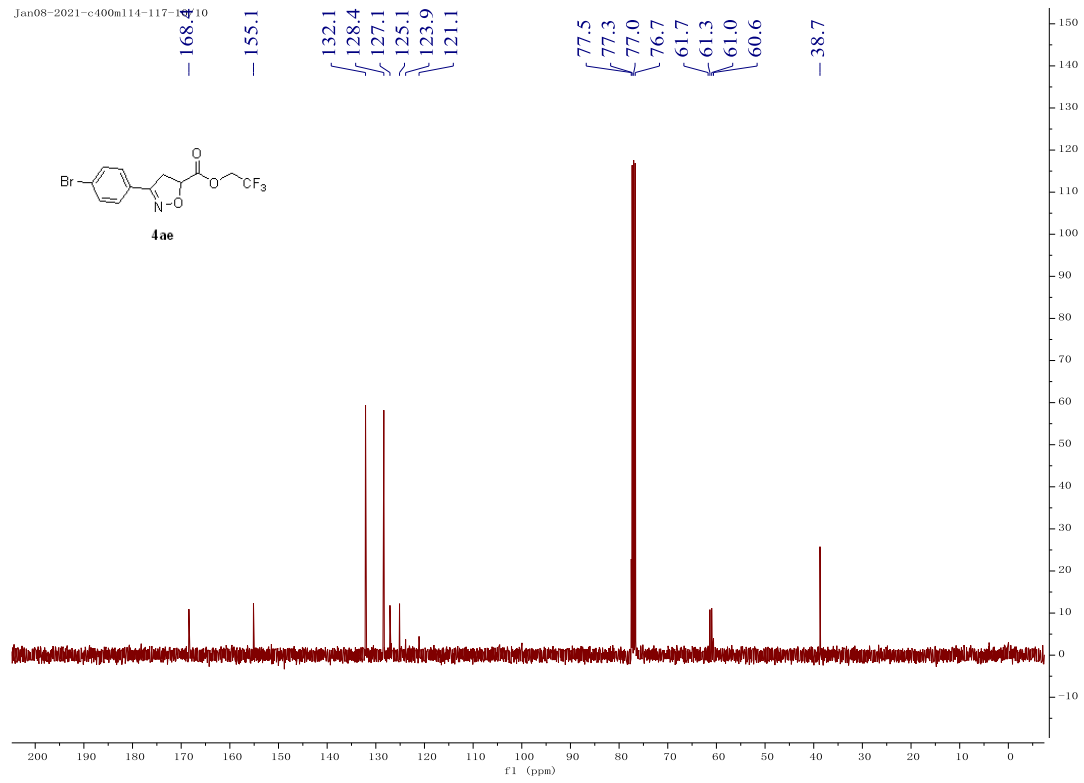

Jan12-2021-f400m114-117-10.10.1.1r

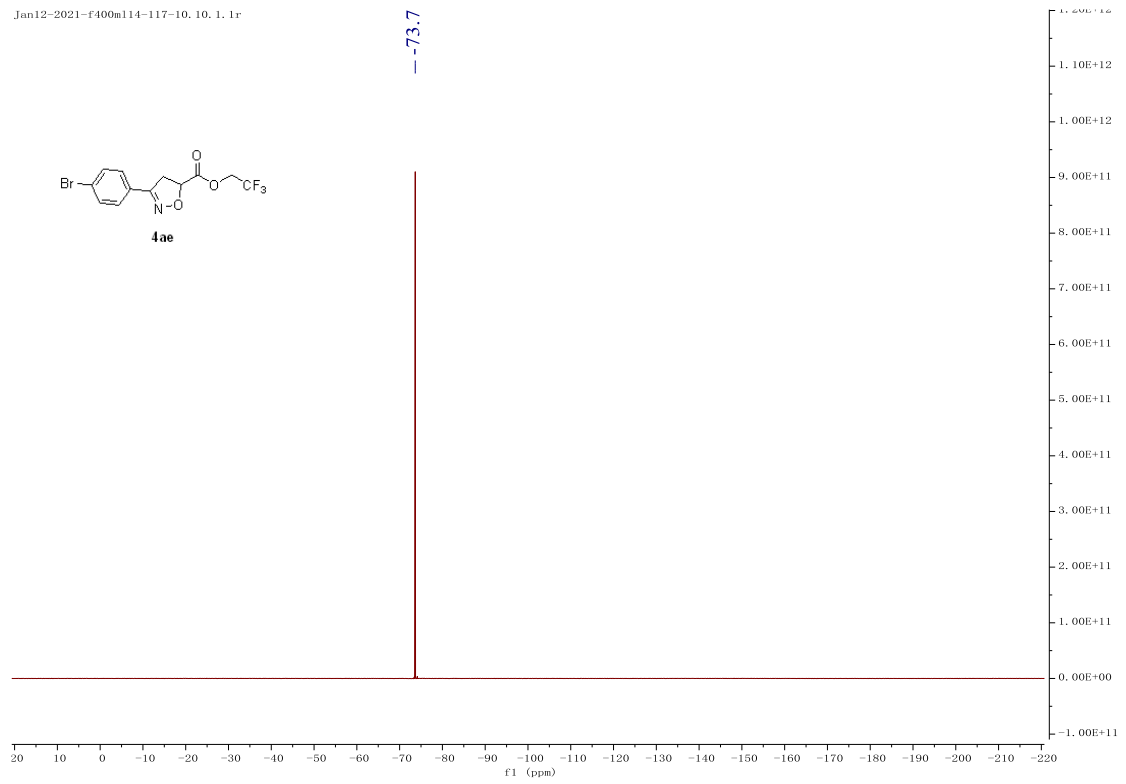

Dec15-2020-h400m114-117-3/10

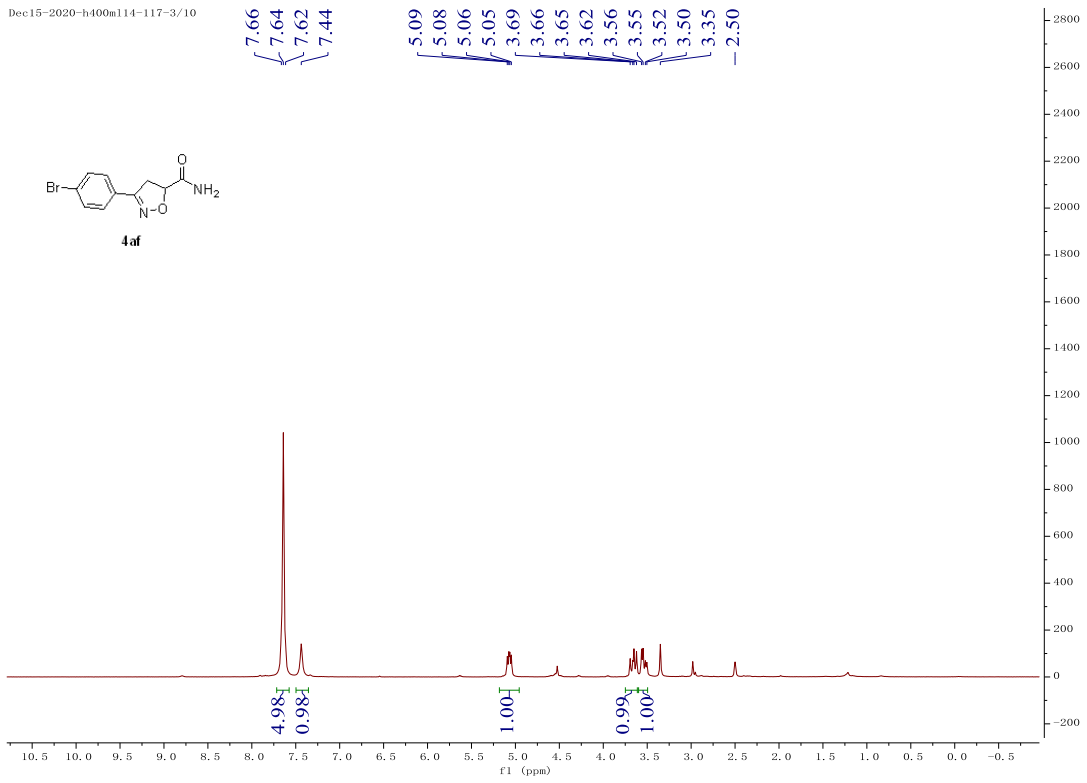

Dec15-2020-c400m14-117-3/10

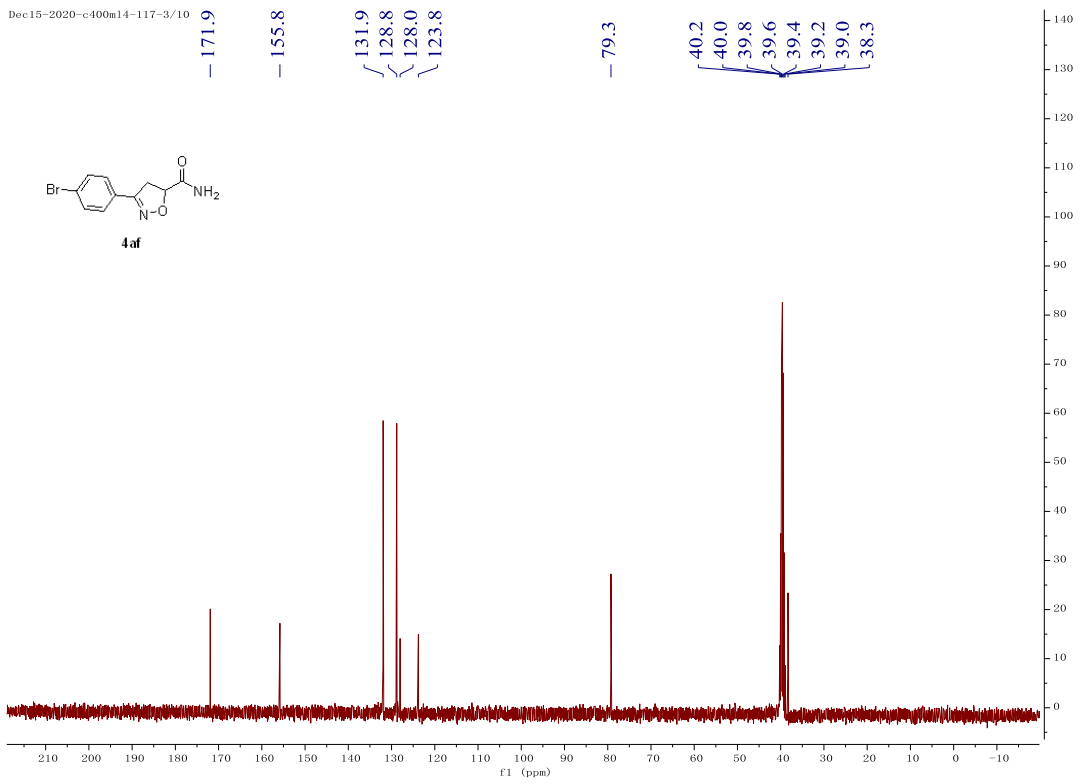

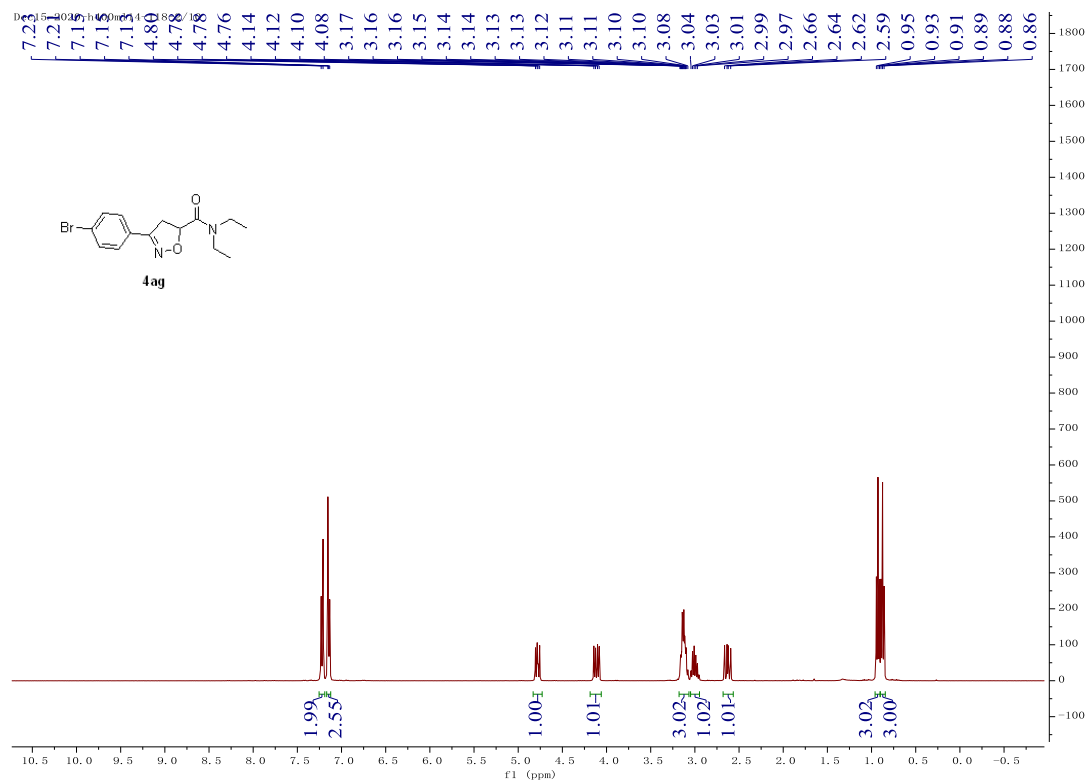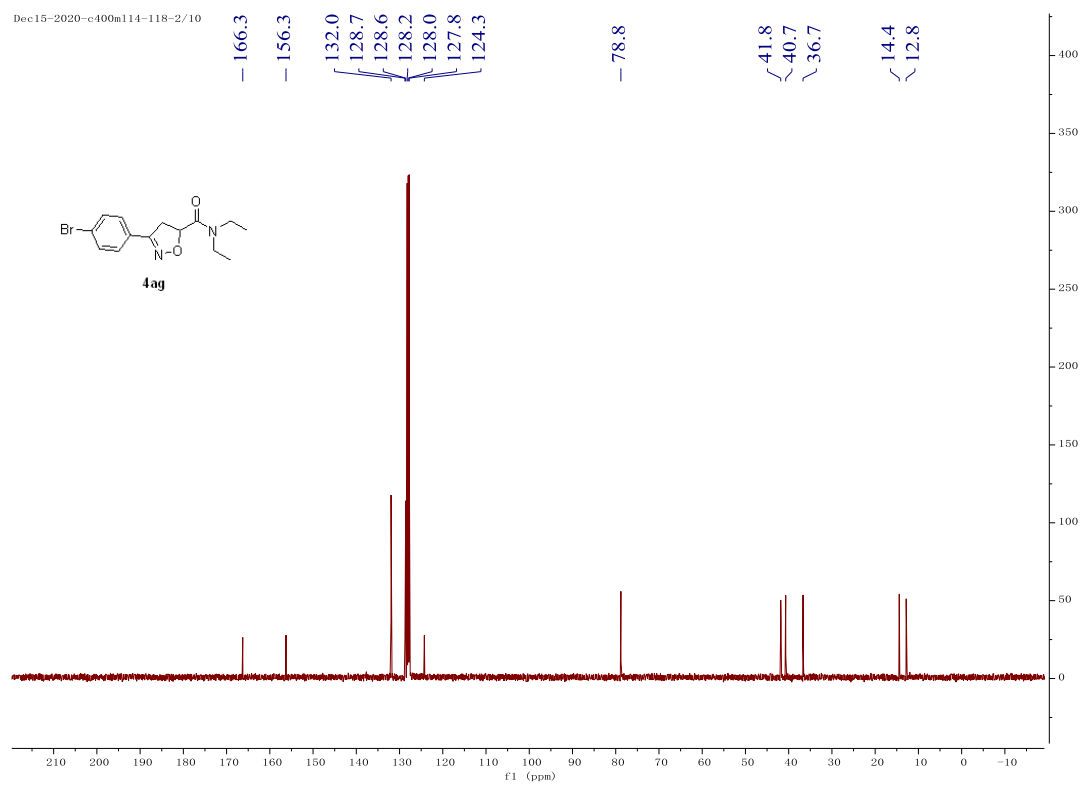

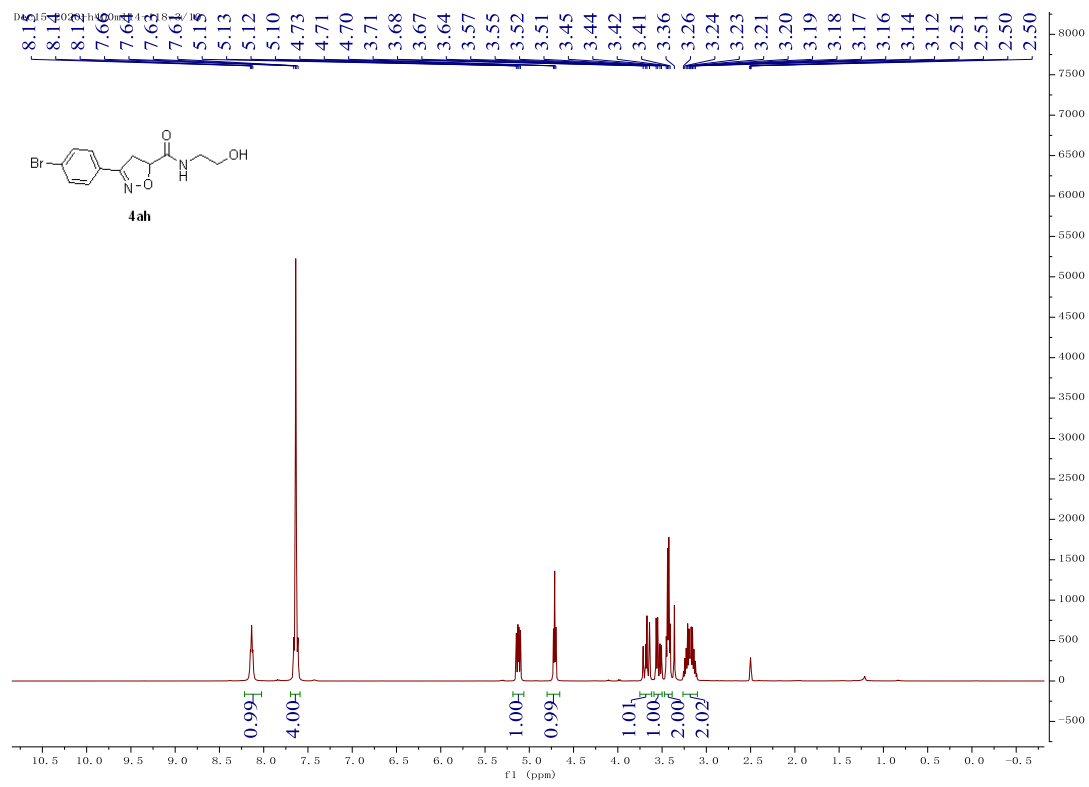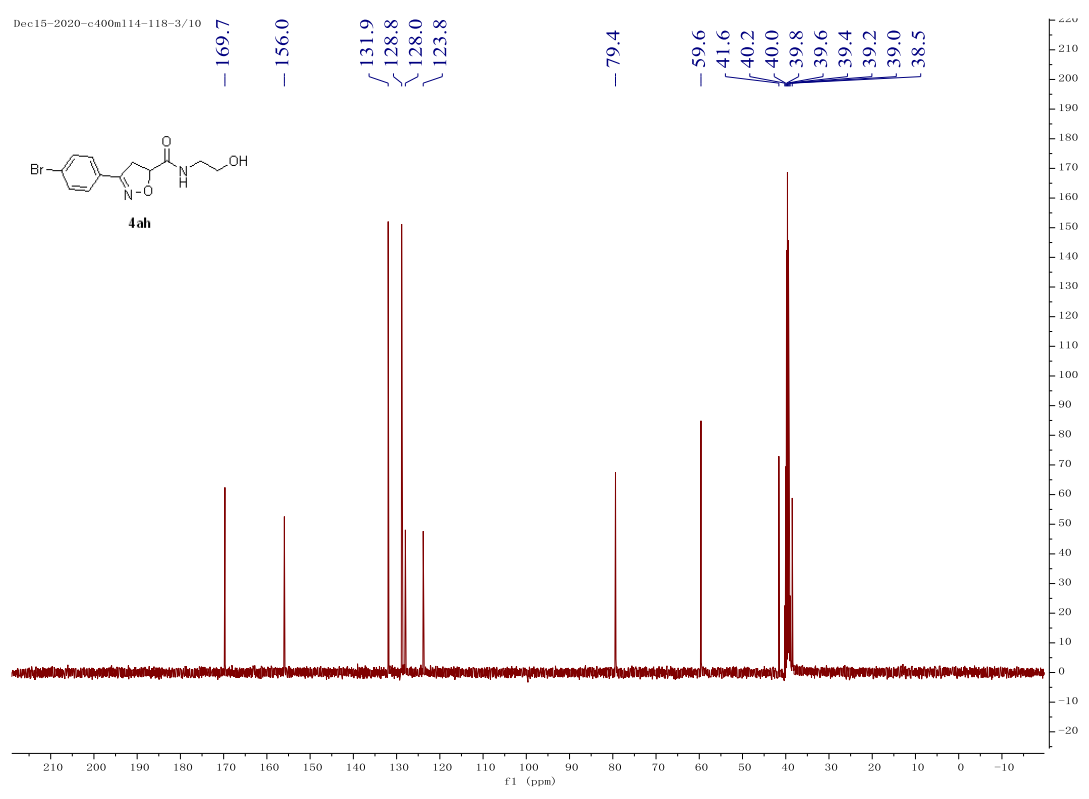



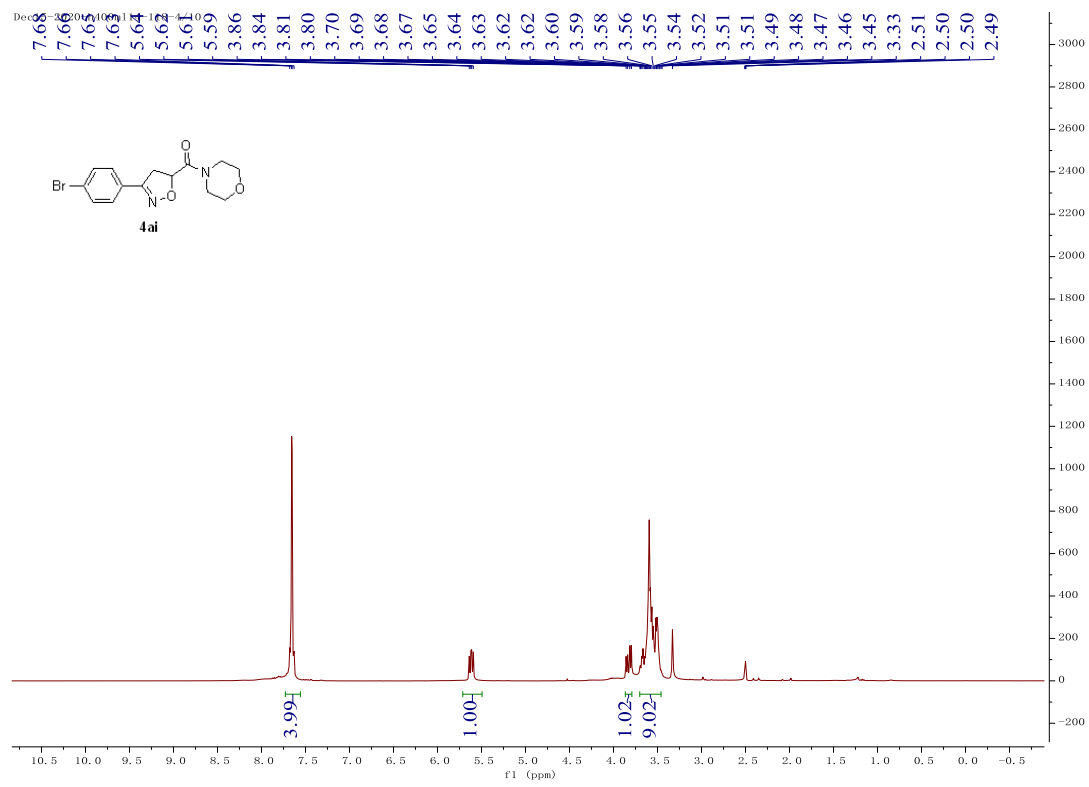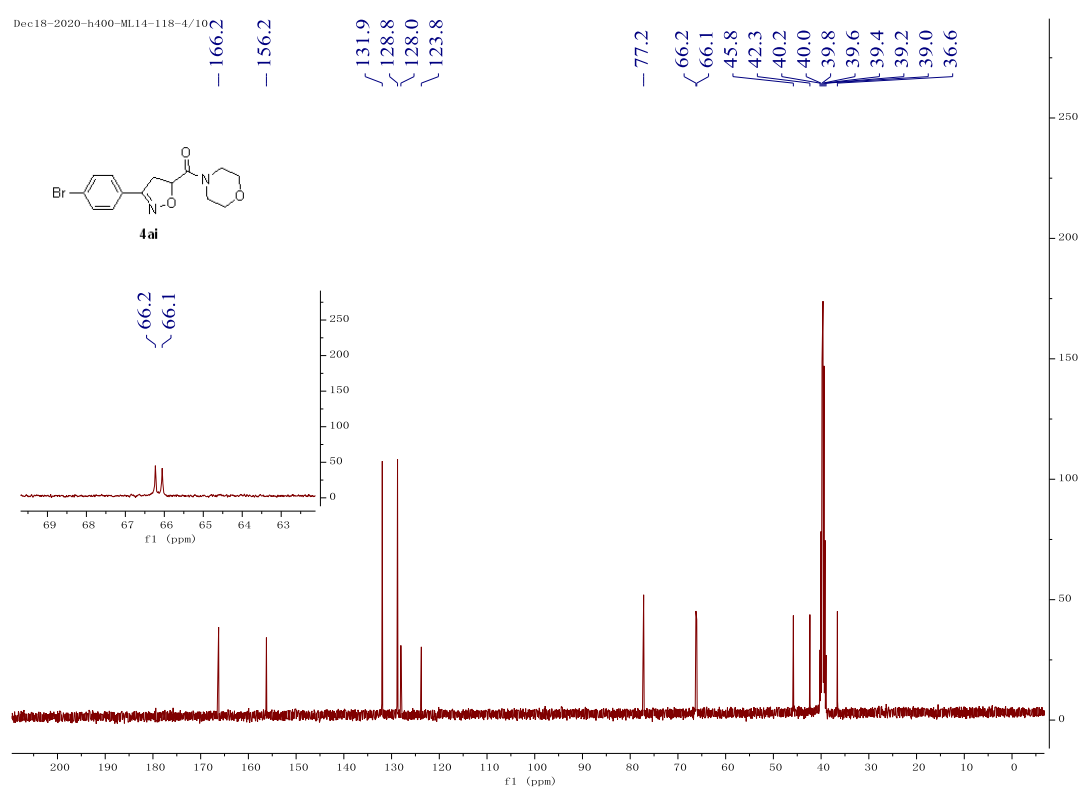

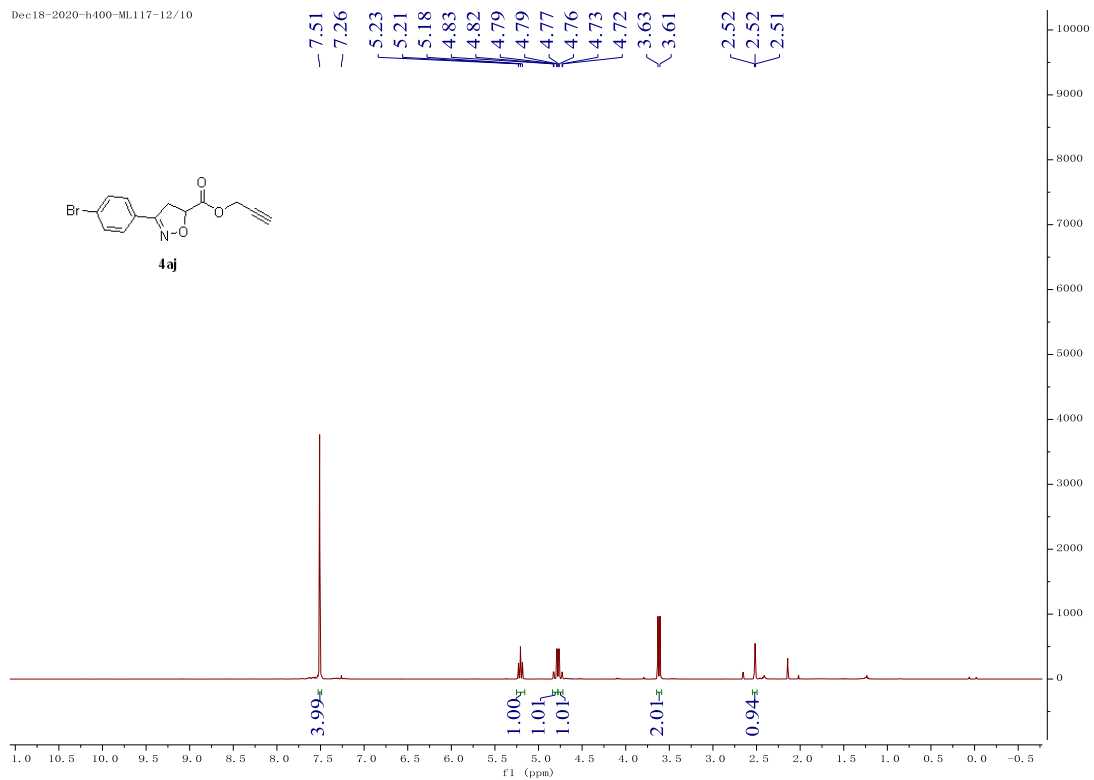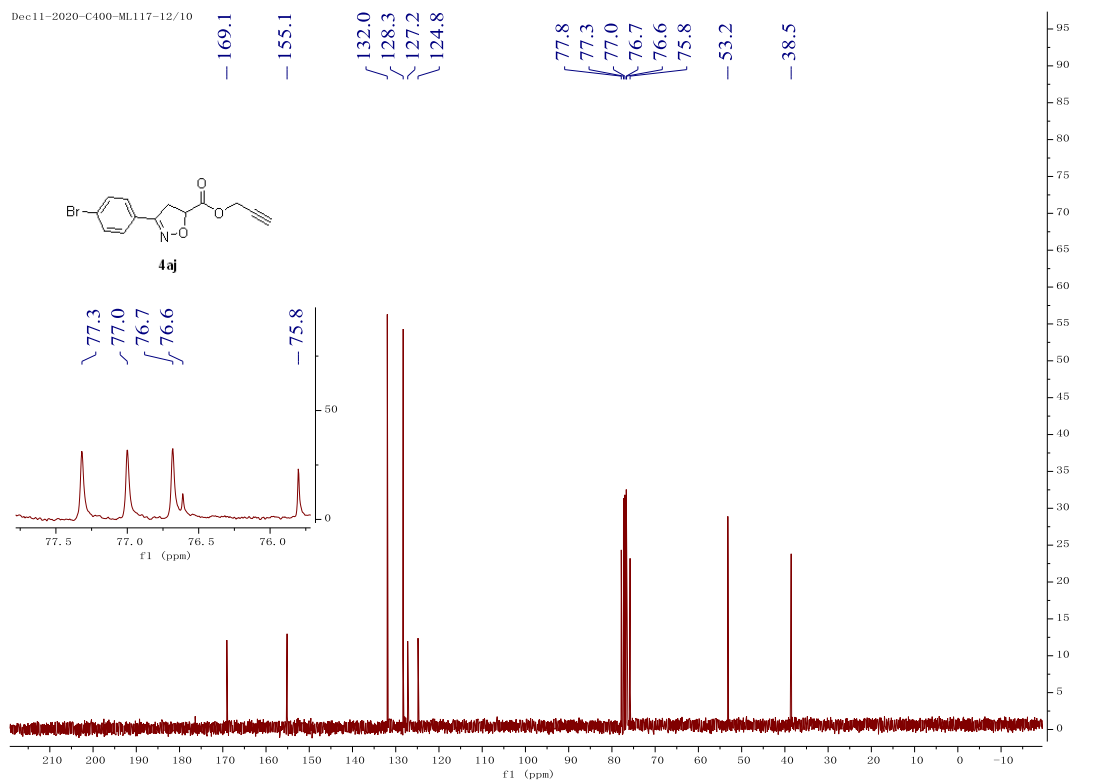

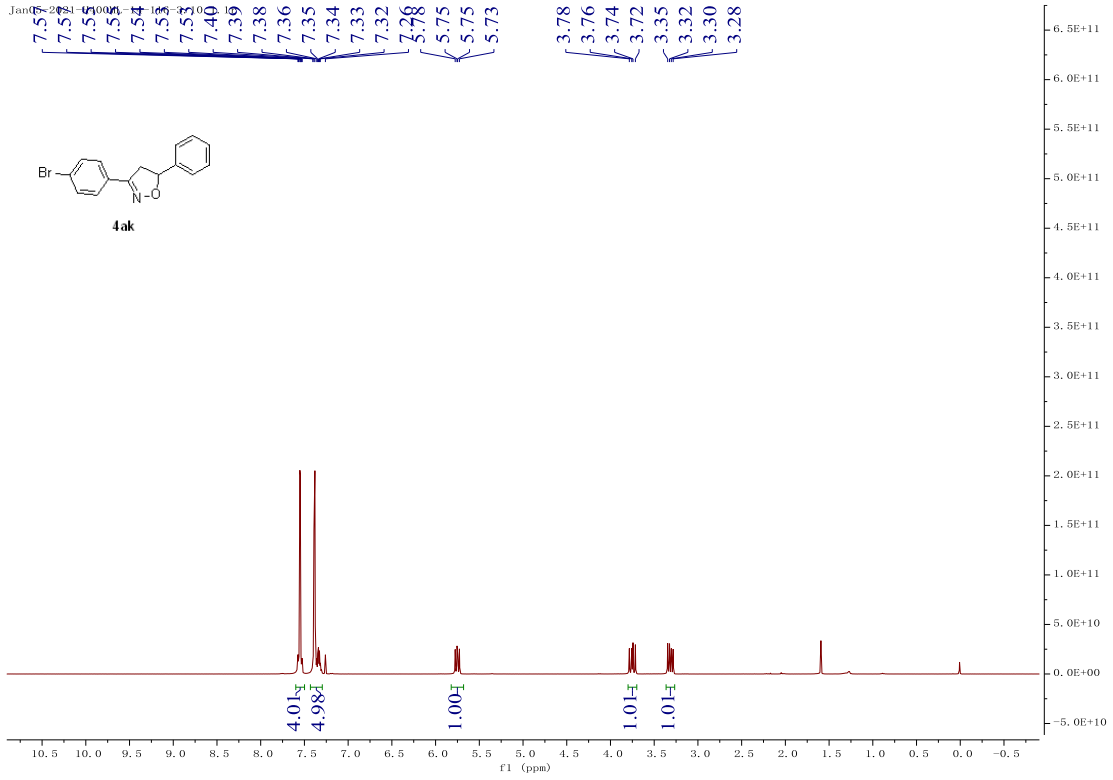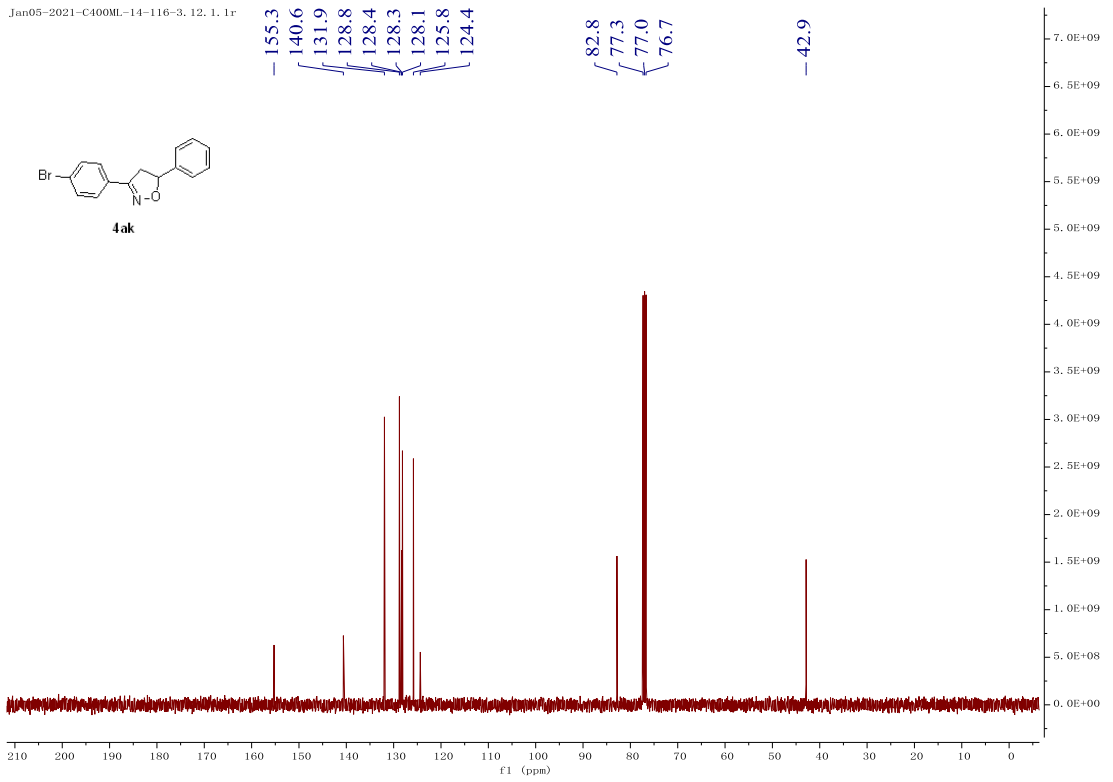

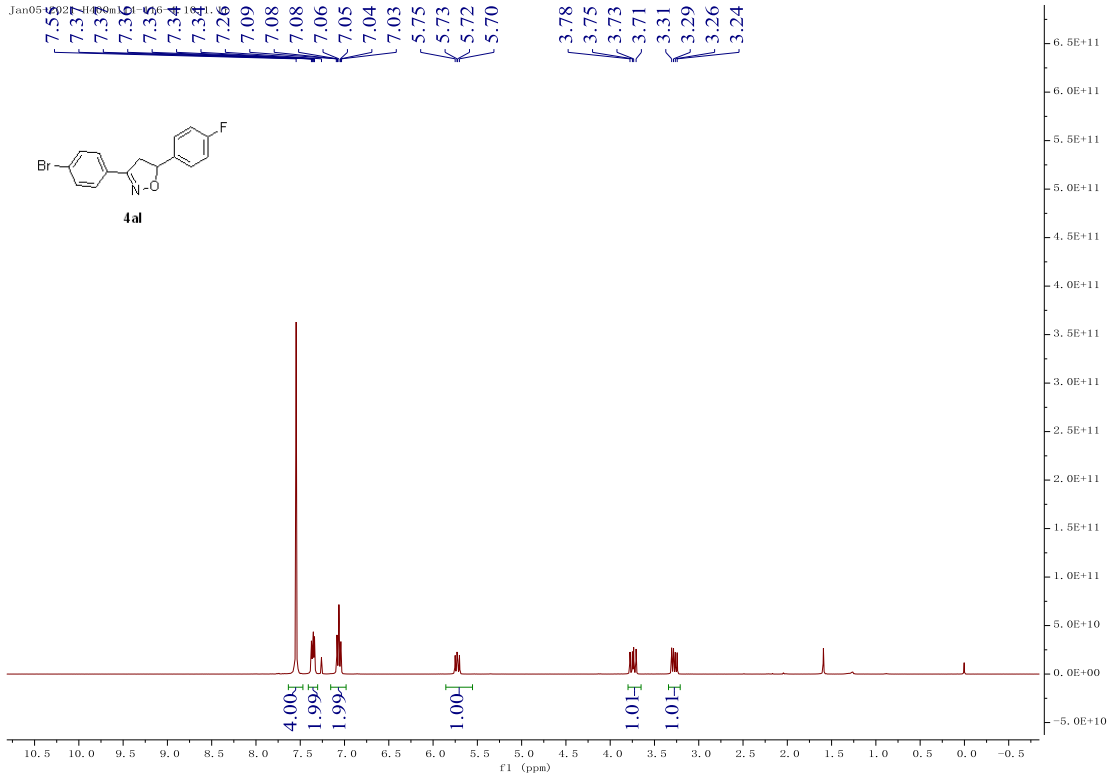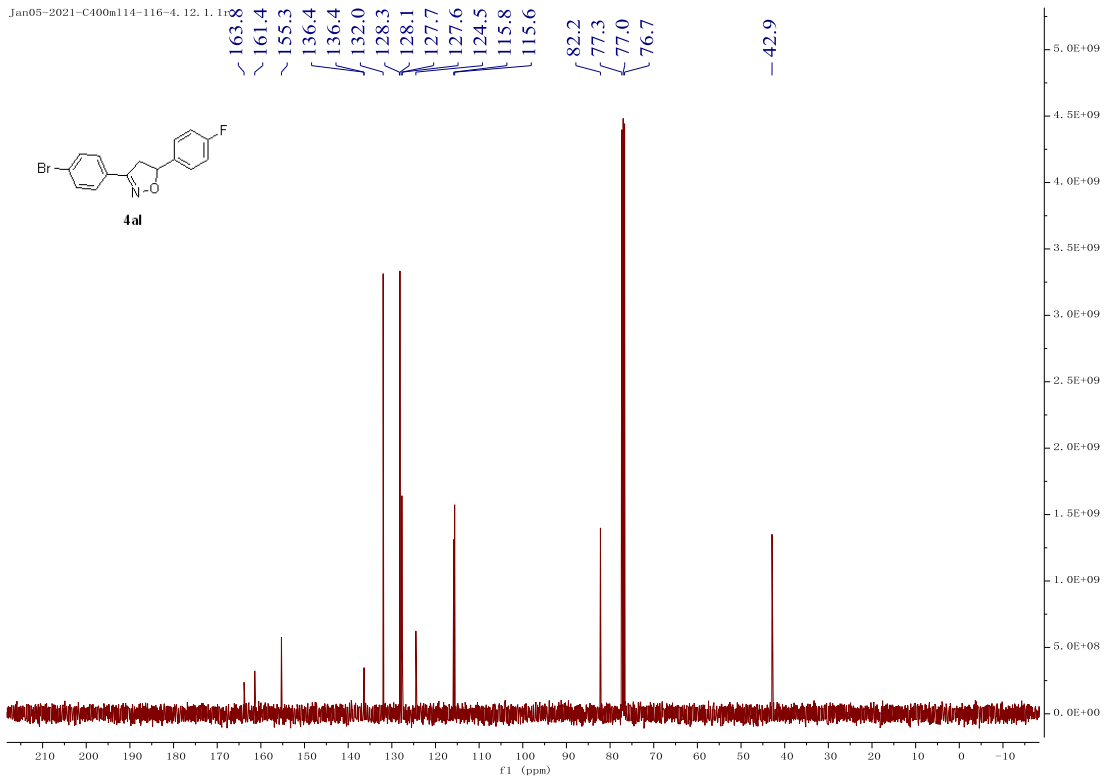

Jan07-2021-H400m114-116-4. 10. 1. 1r

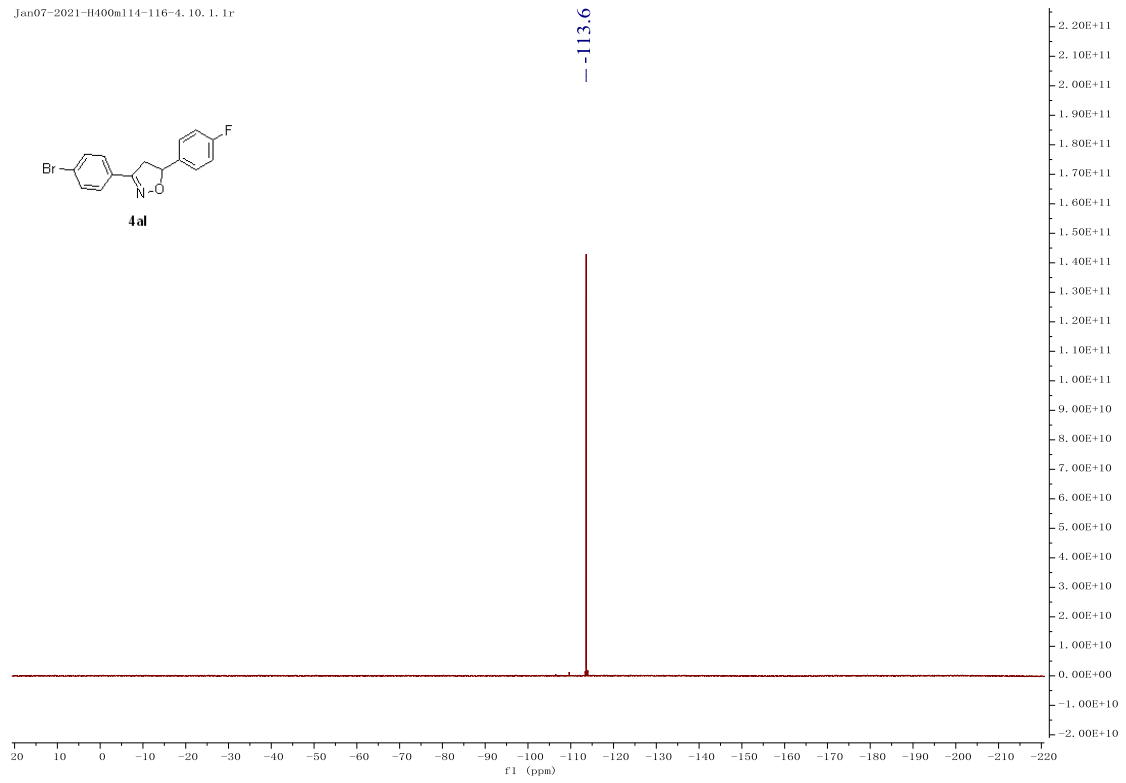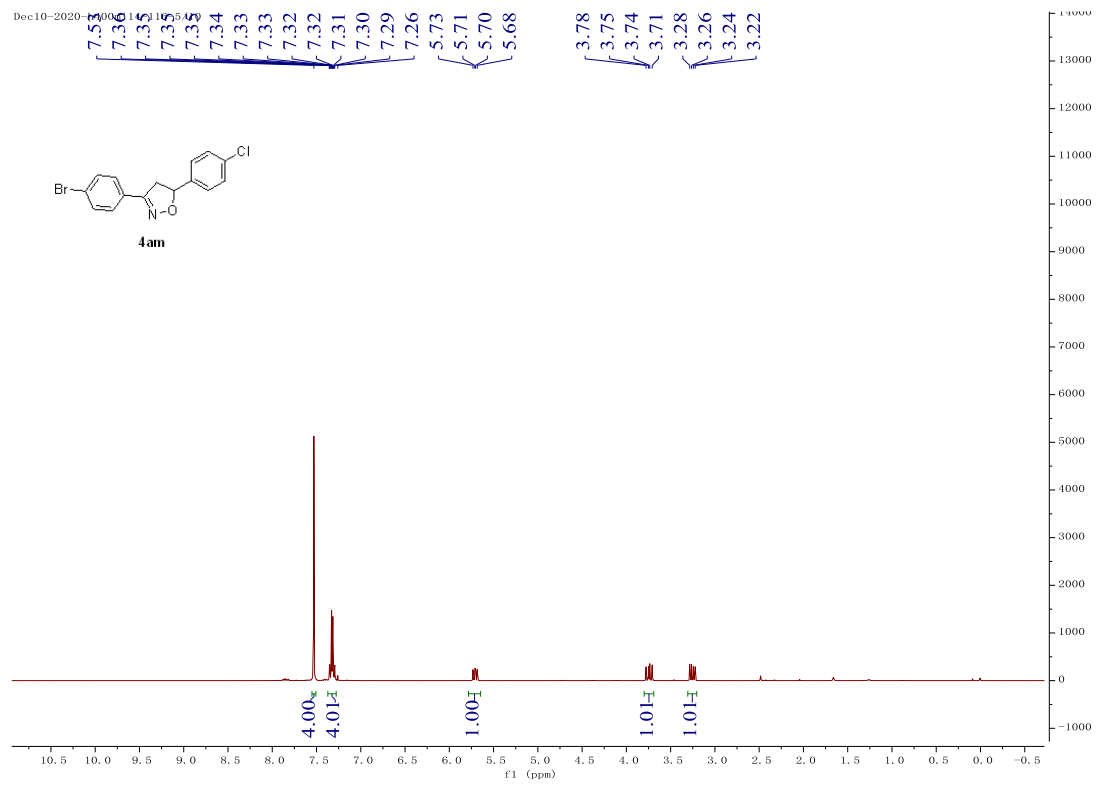

Dec10-2020-c400m114-116-5/10

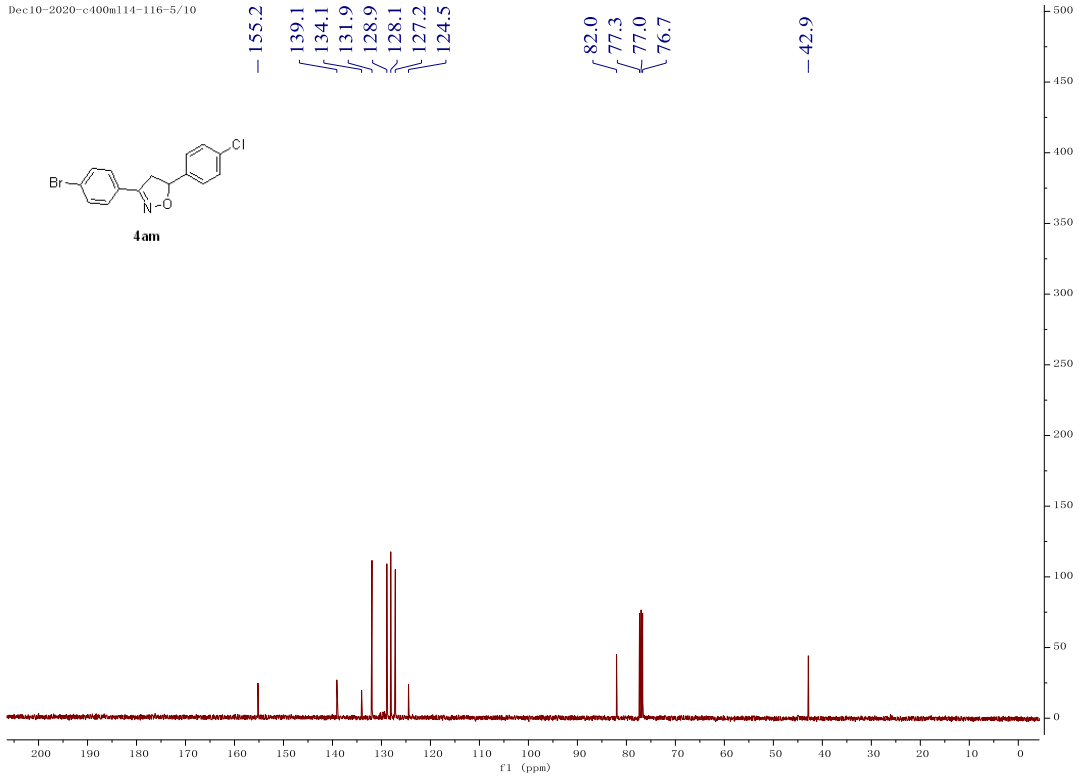

Dec10-2020-h400m114-116-6/10

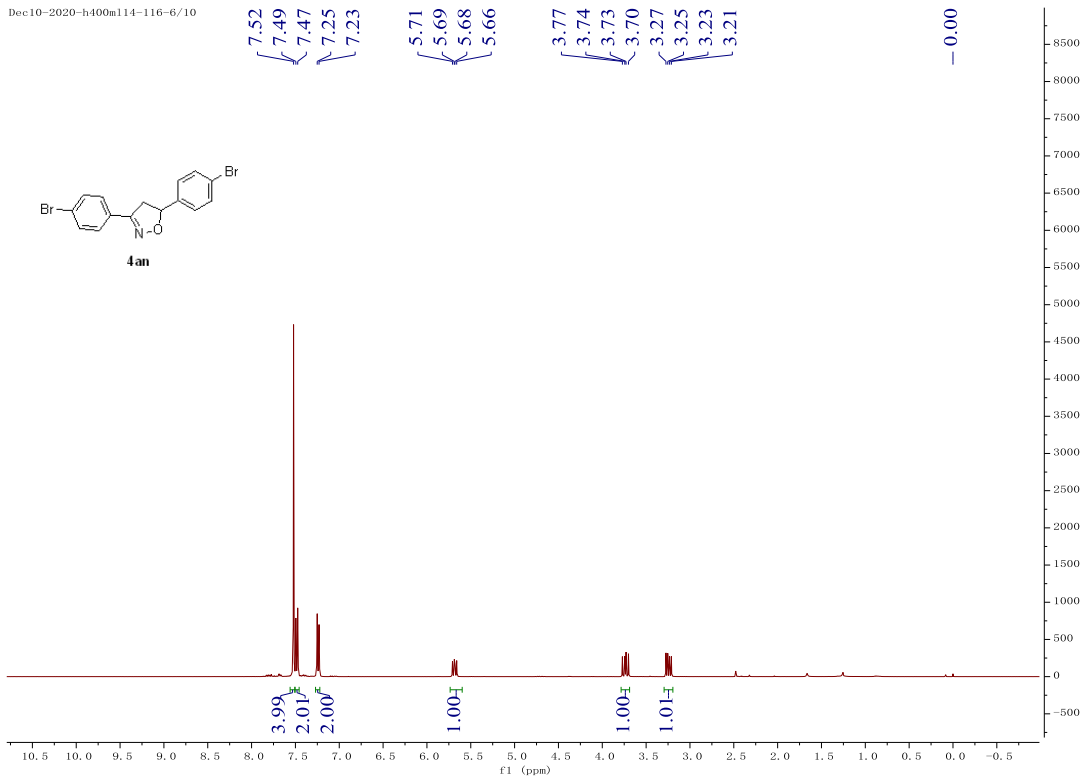

Dec10-2020-c400m114-116-6/10

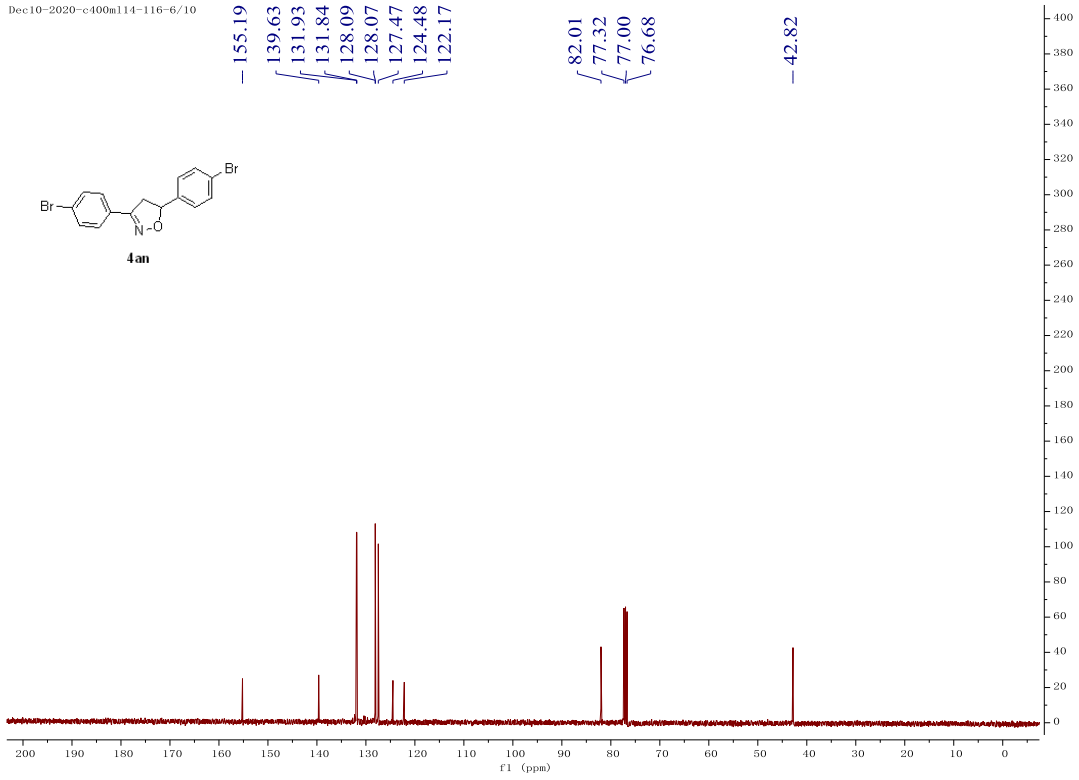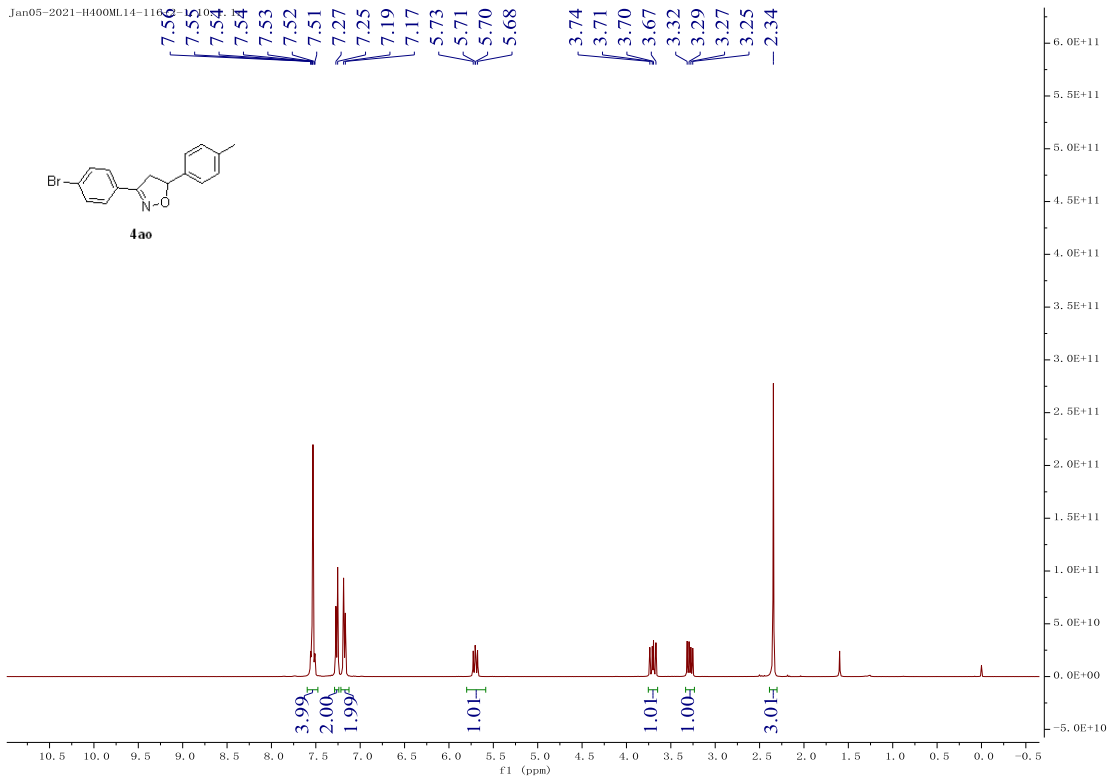

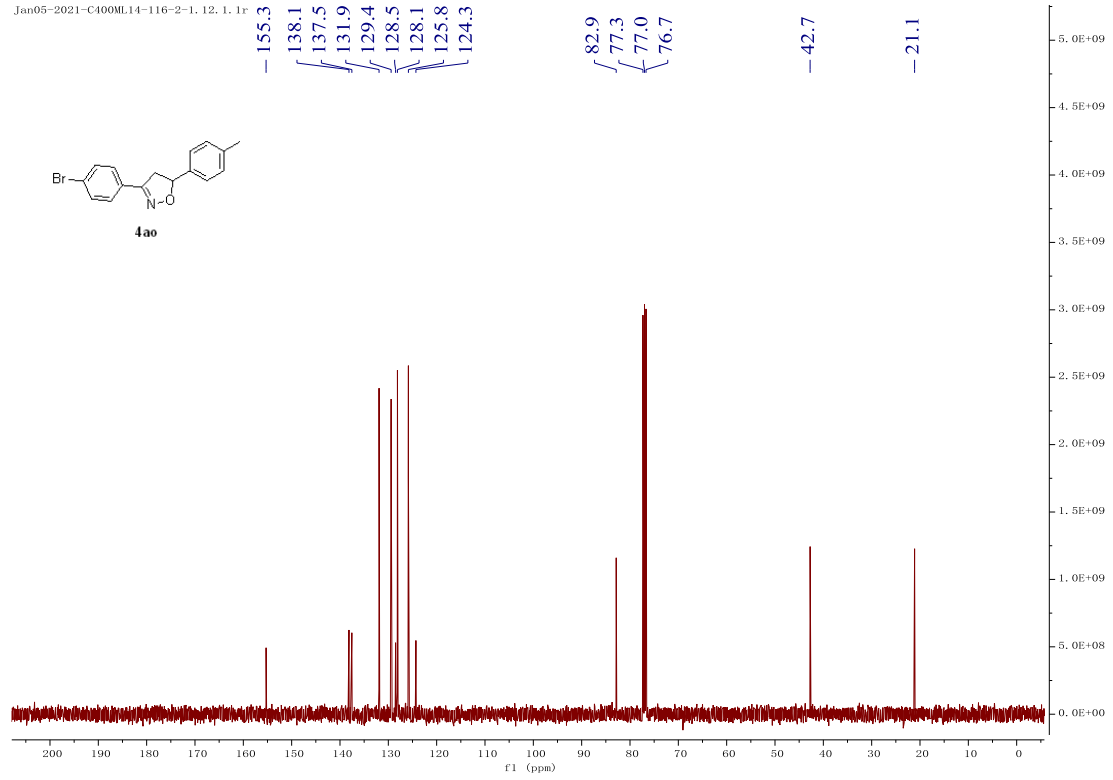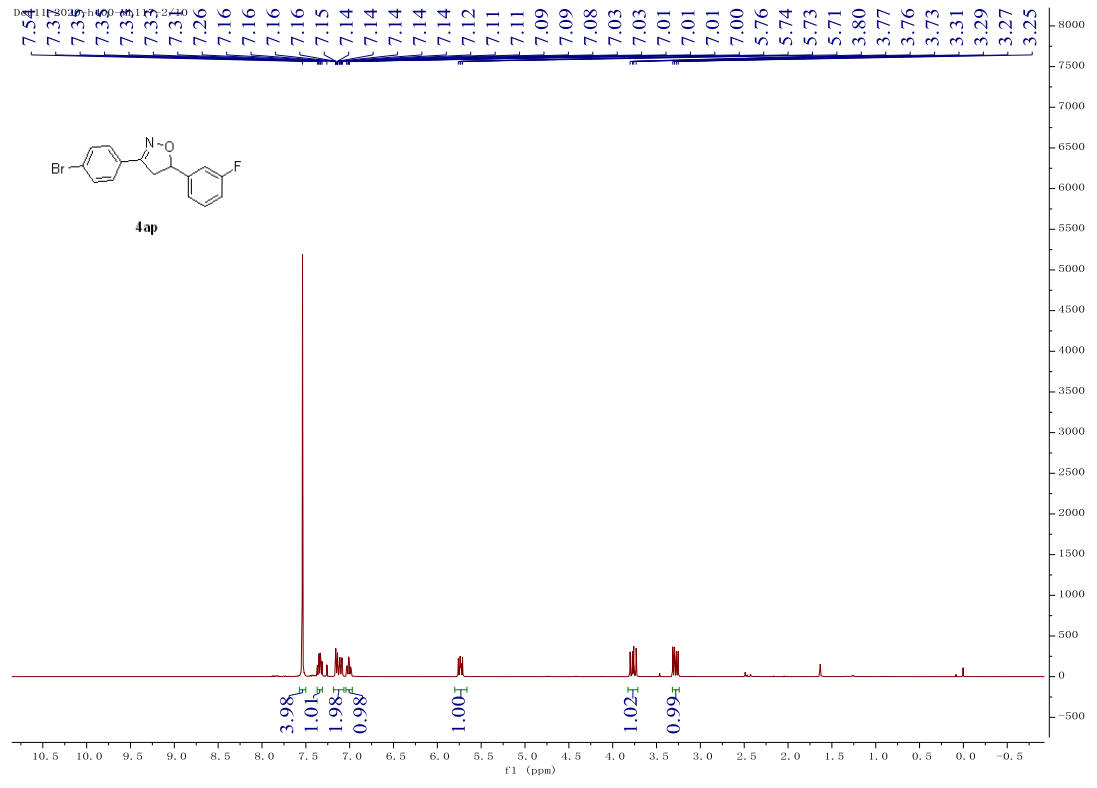



Dec11-2020-C400-ML19

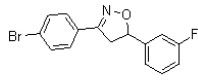

4ap

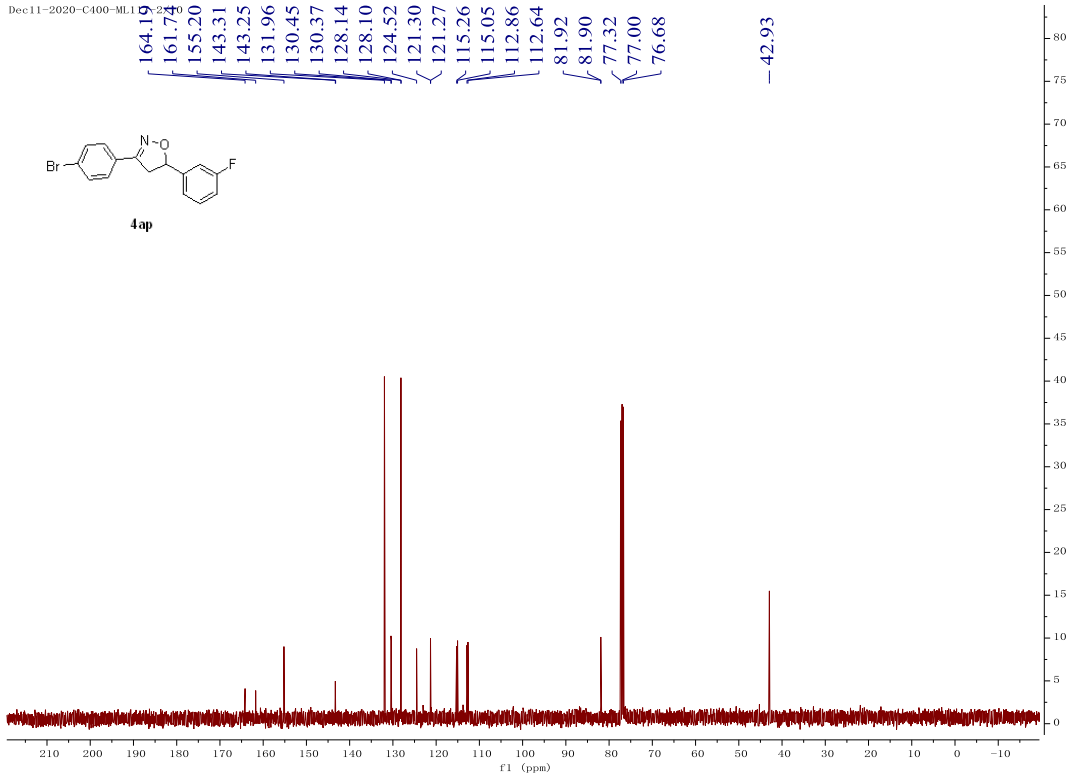

Dec18-2020-H400-ML11-7-2.10.1.1r

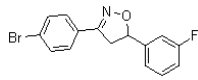

4ap

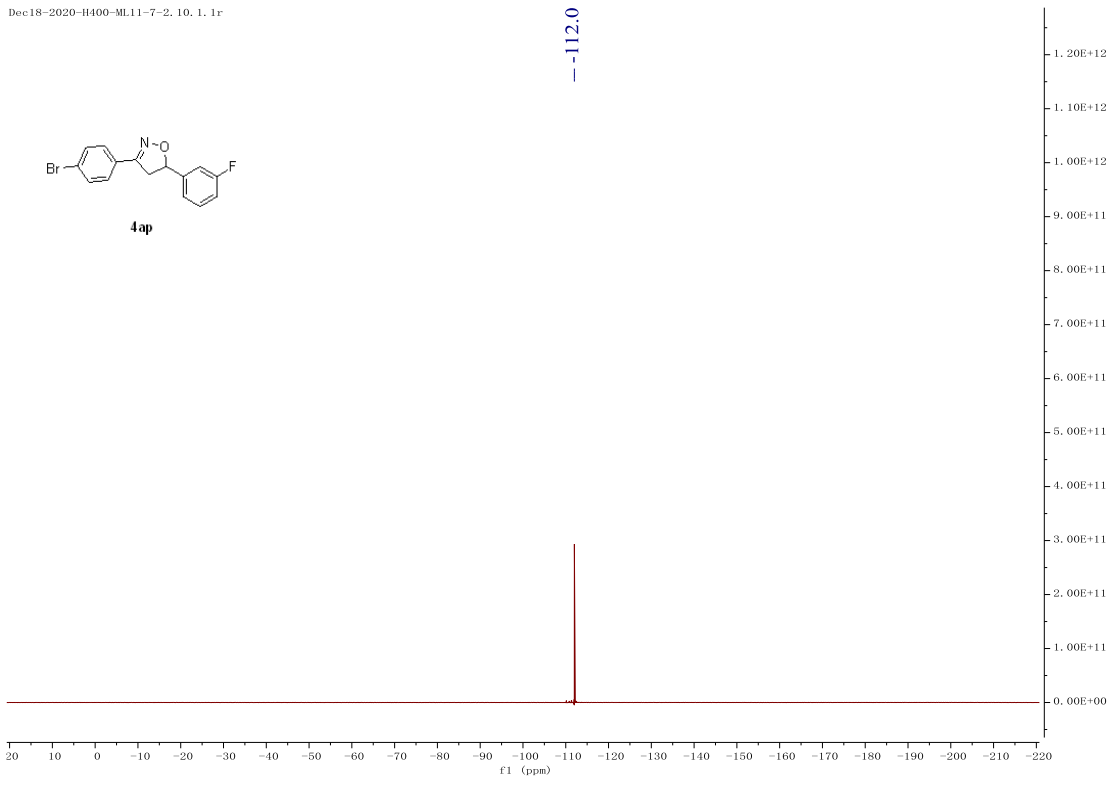

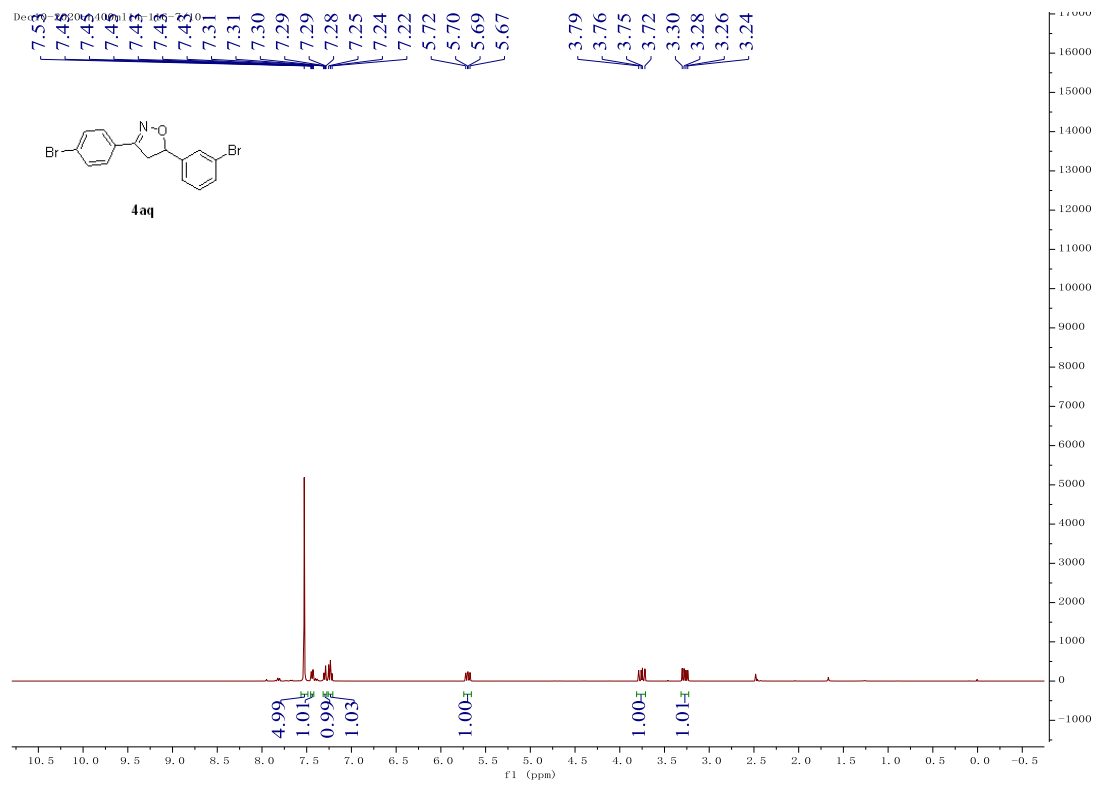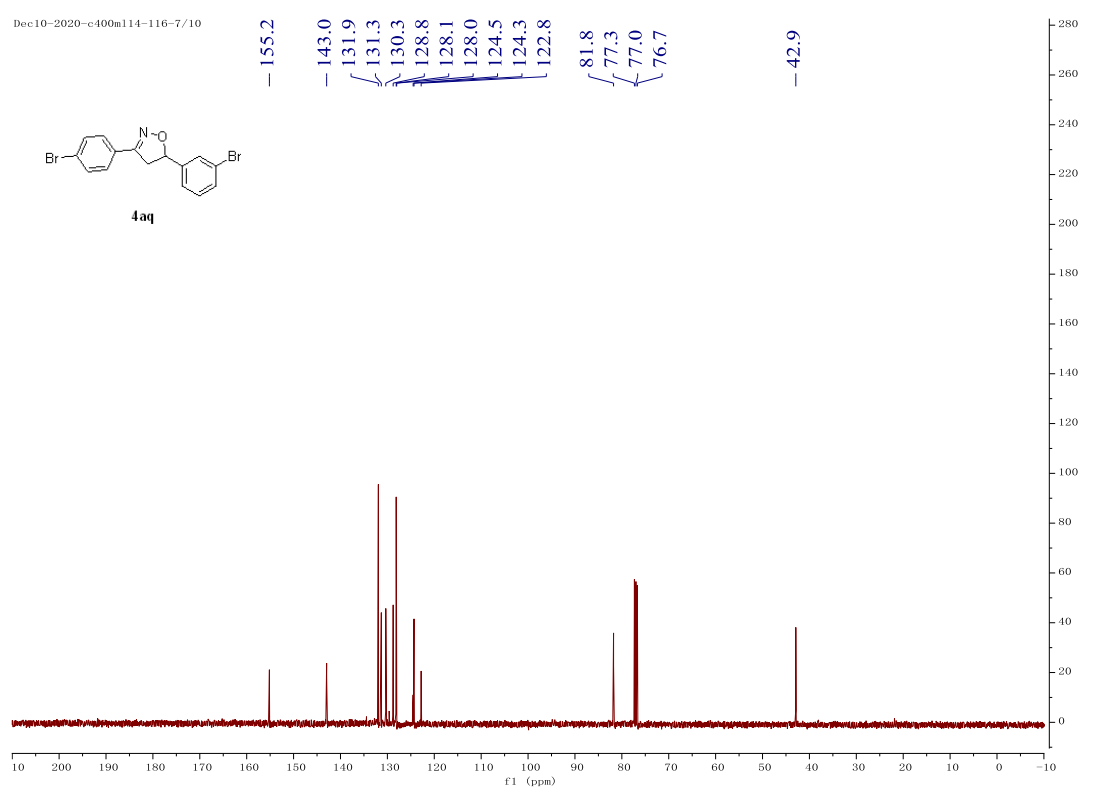

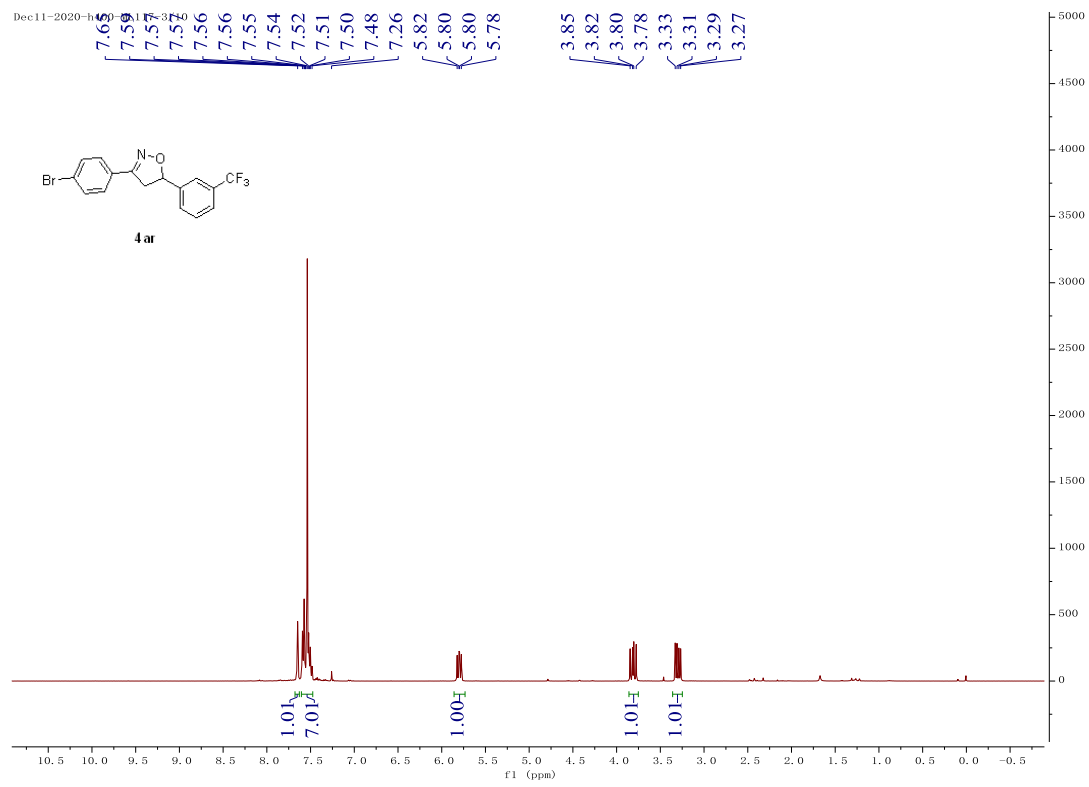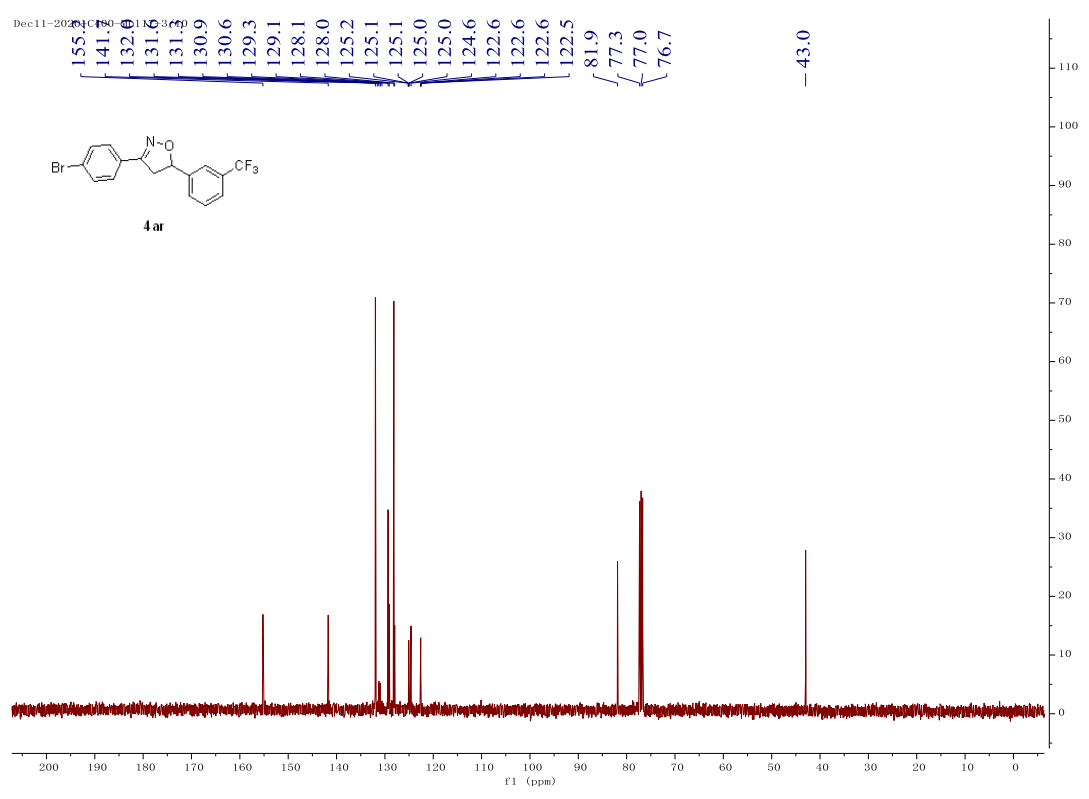

Dec18-2020-F400-ML117-3. 10. 1. 1r

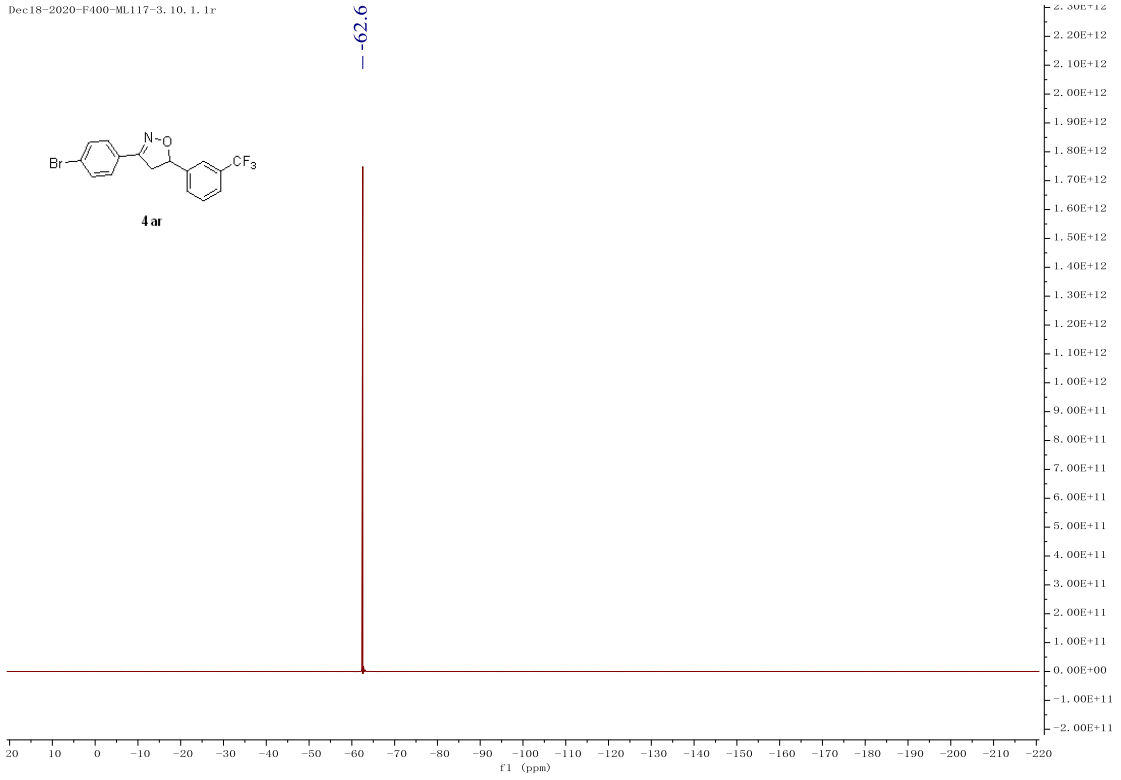

Dec25-2020-H400m114-125-3. 10. 1. 1r

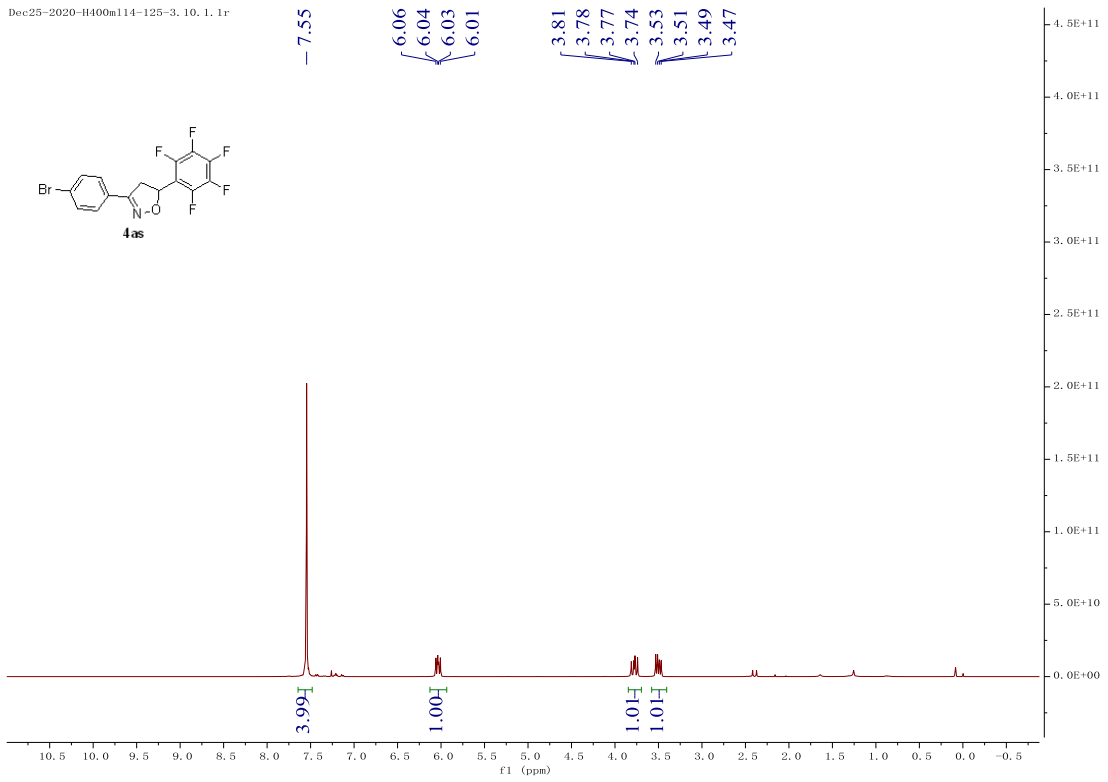

Dec25-2020-C400m114-125-3. 12. 1. 1r

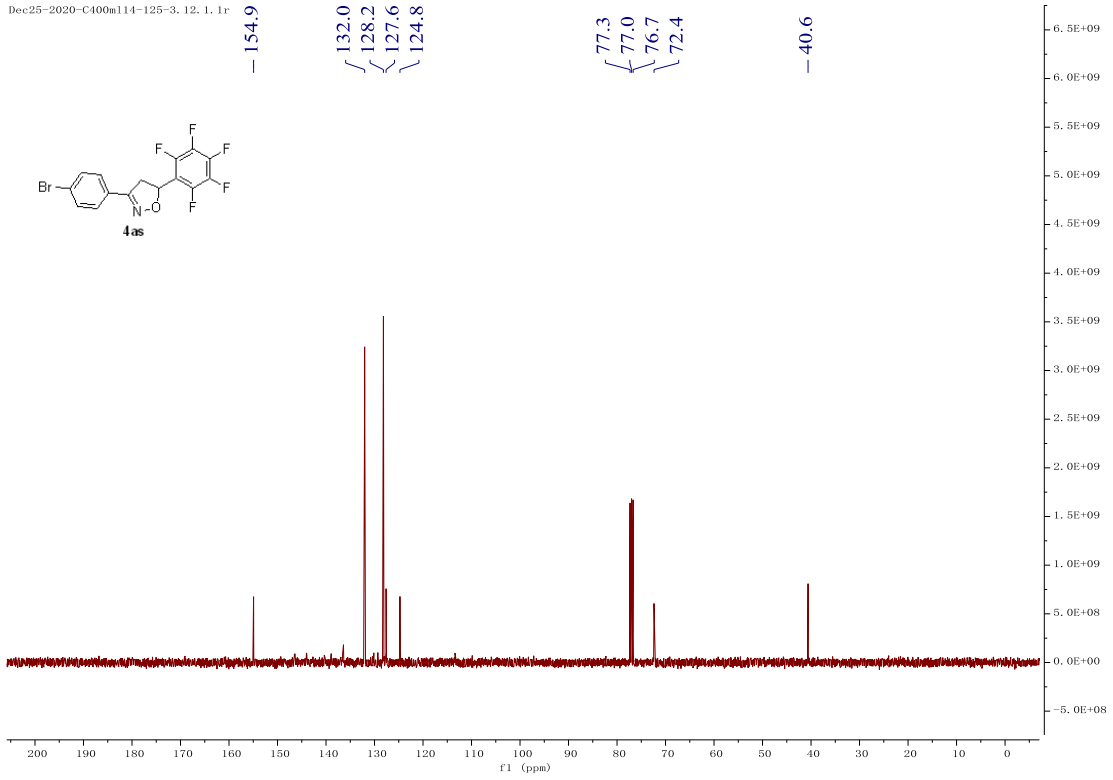

Jan07-2021-F400m114-125-3

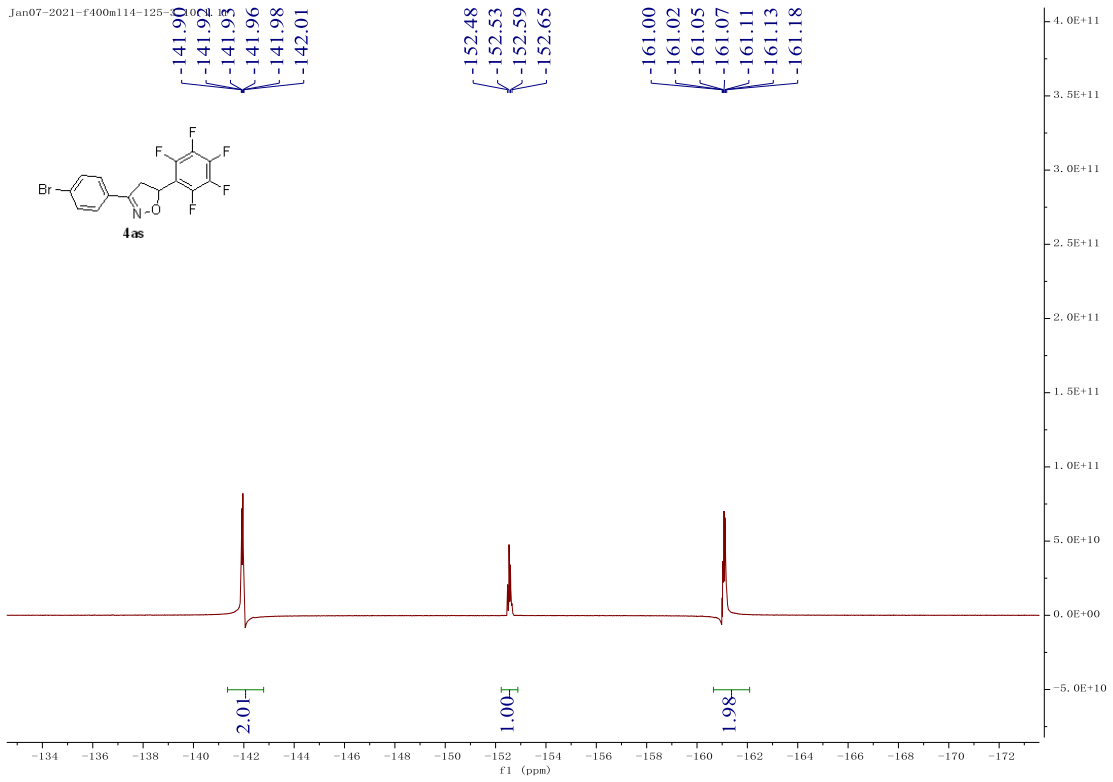

Jan14-2021-H400m115-12-1.10.1.1r

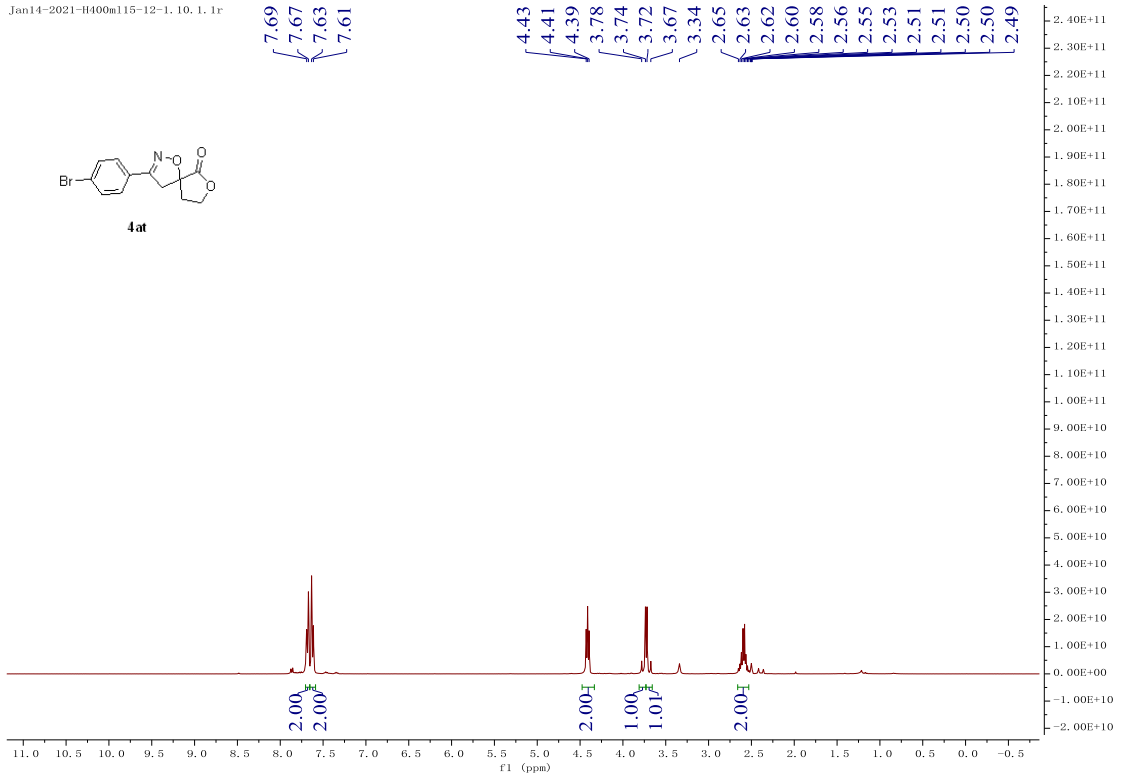

Jan14-2021-c400m118-12-1.12.1.1r

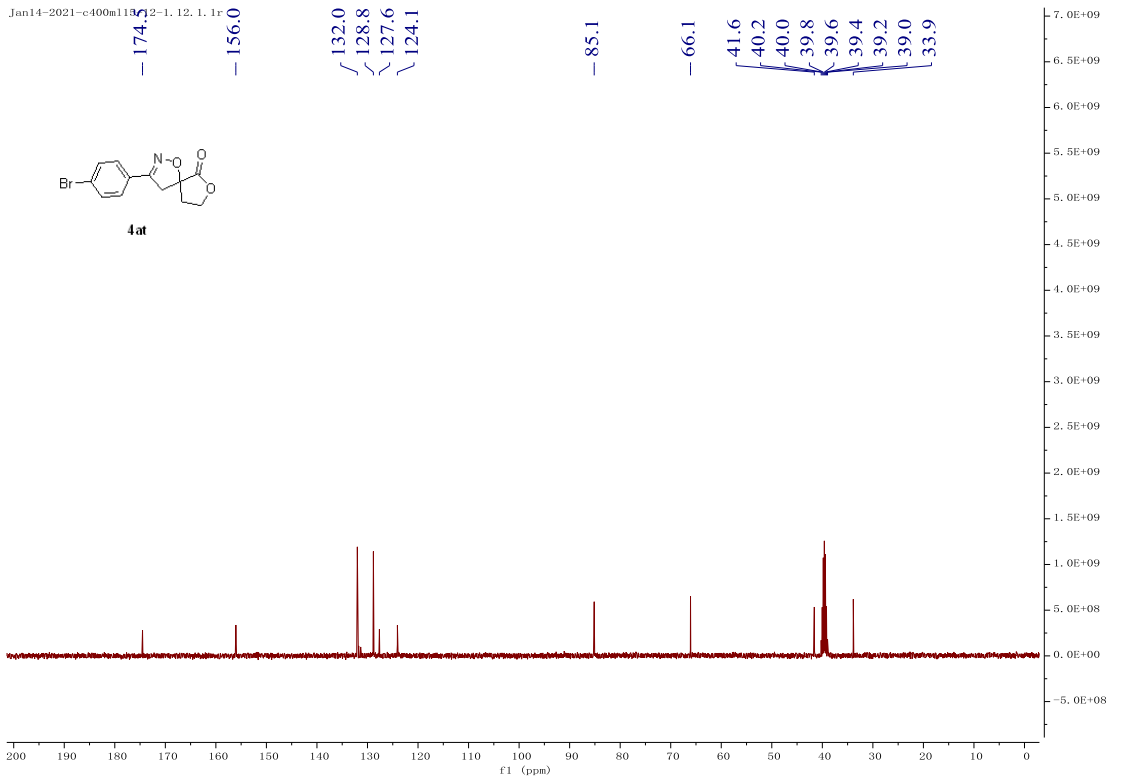

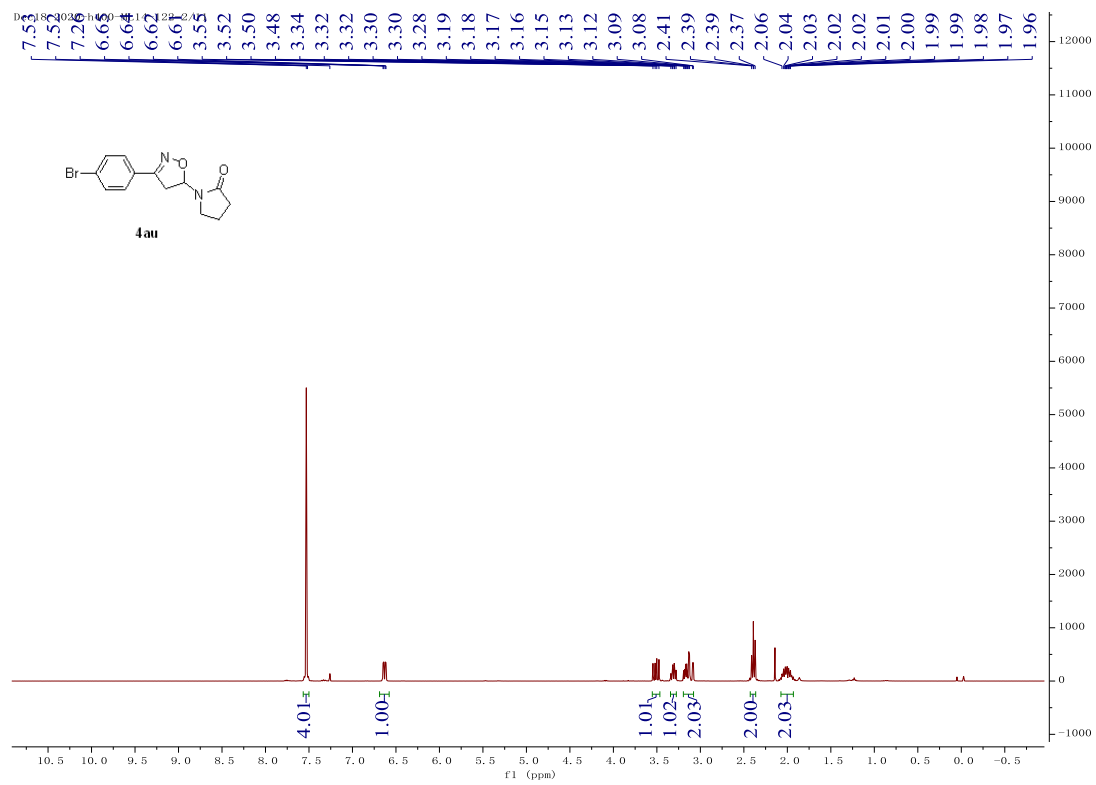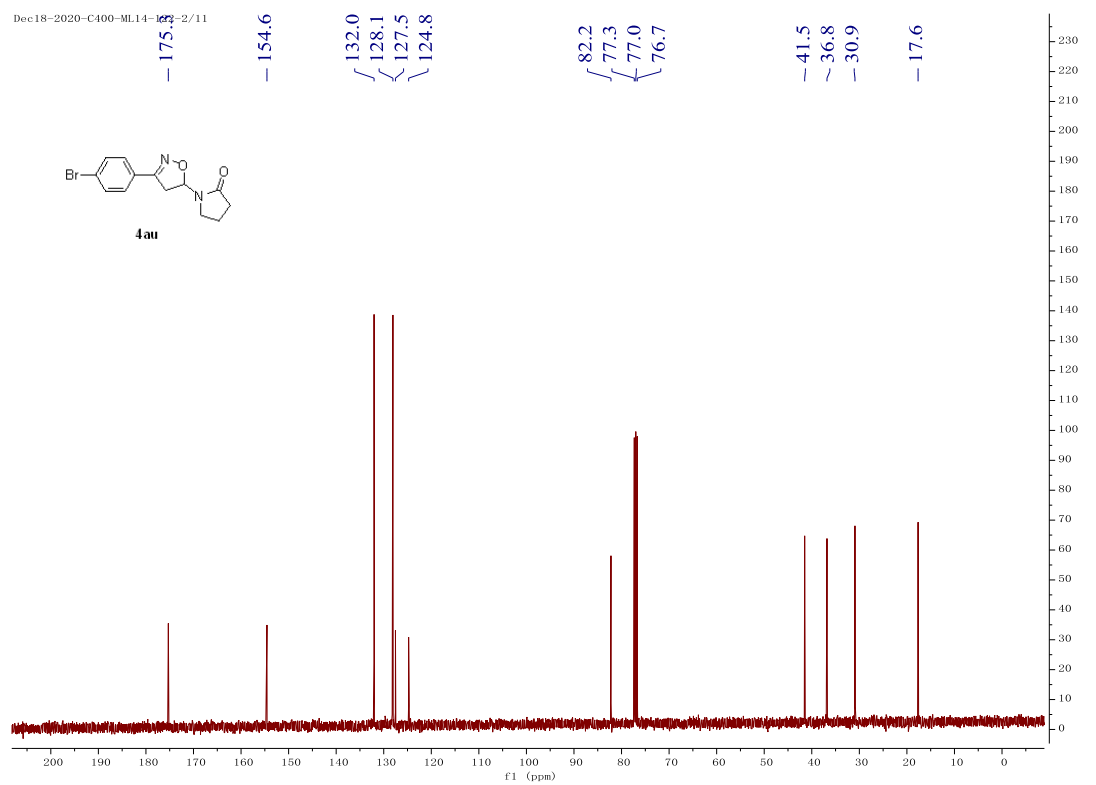

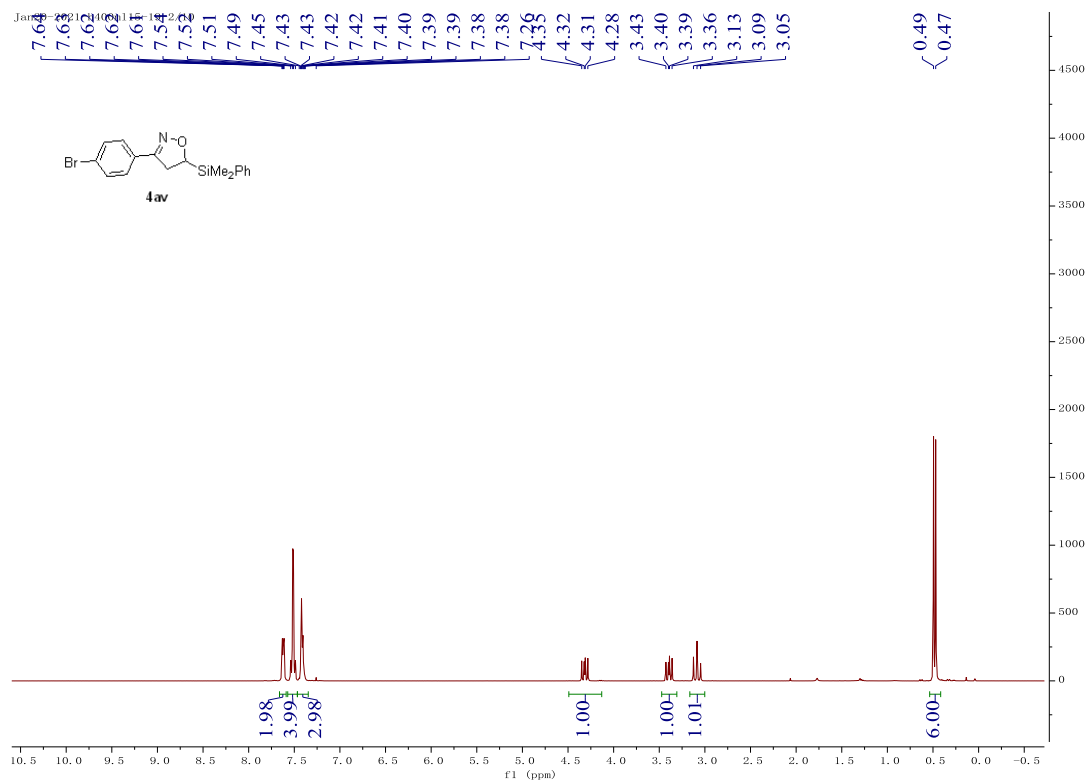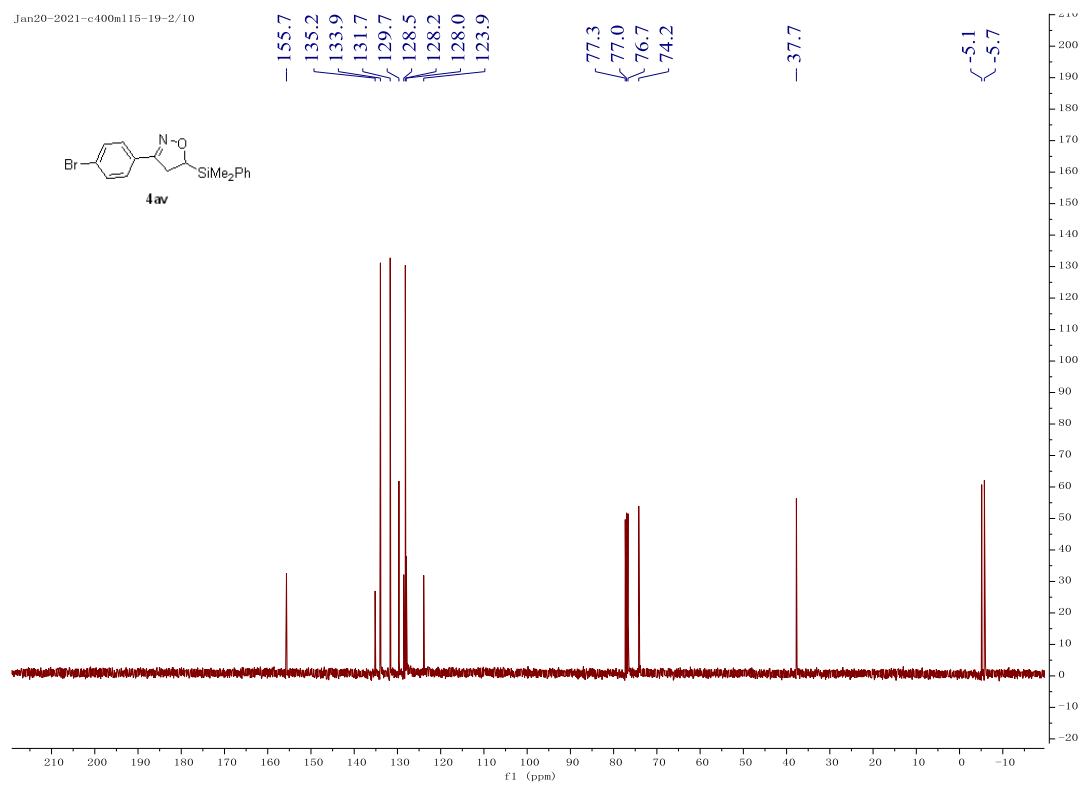



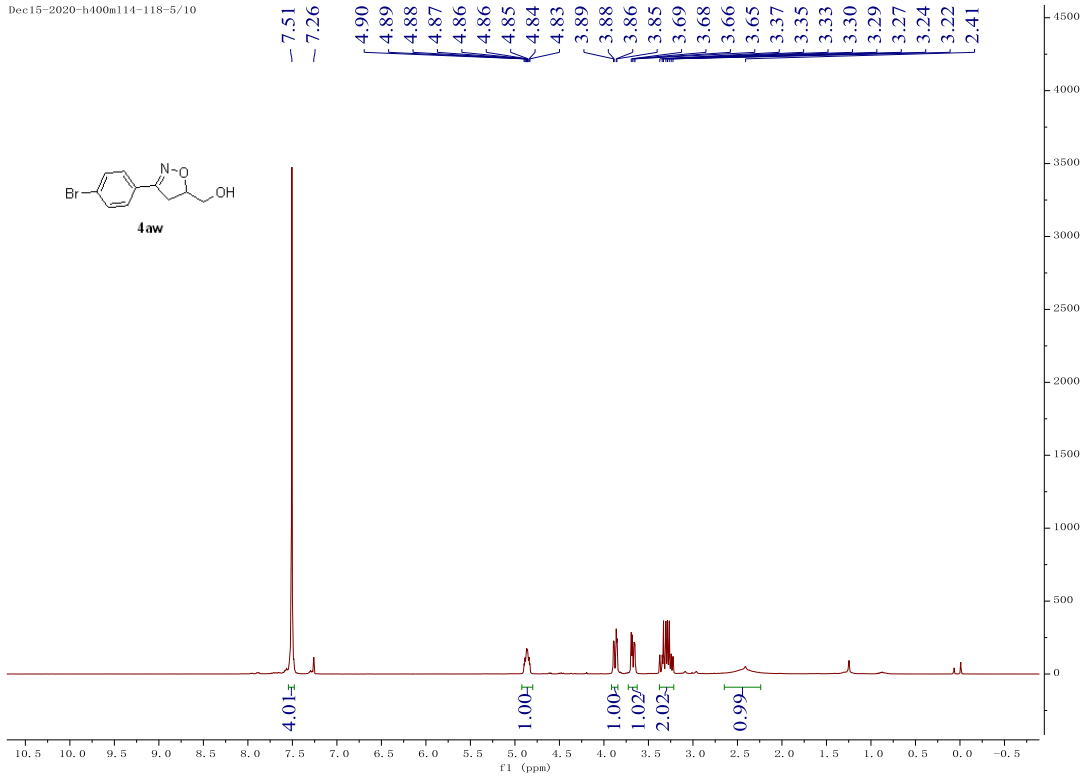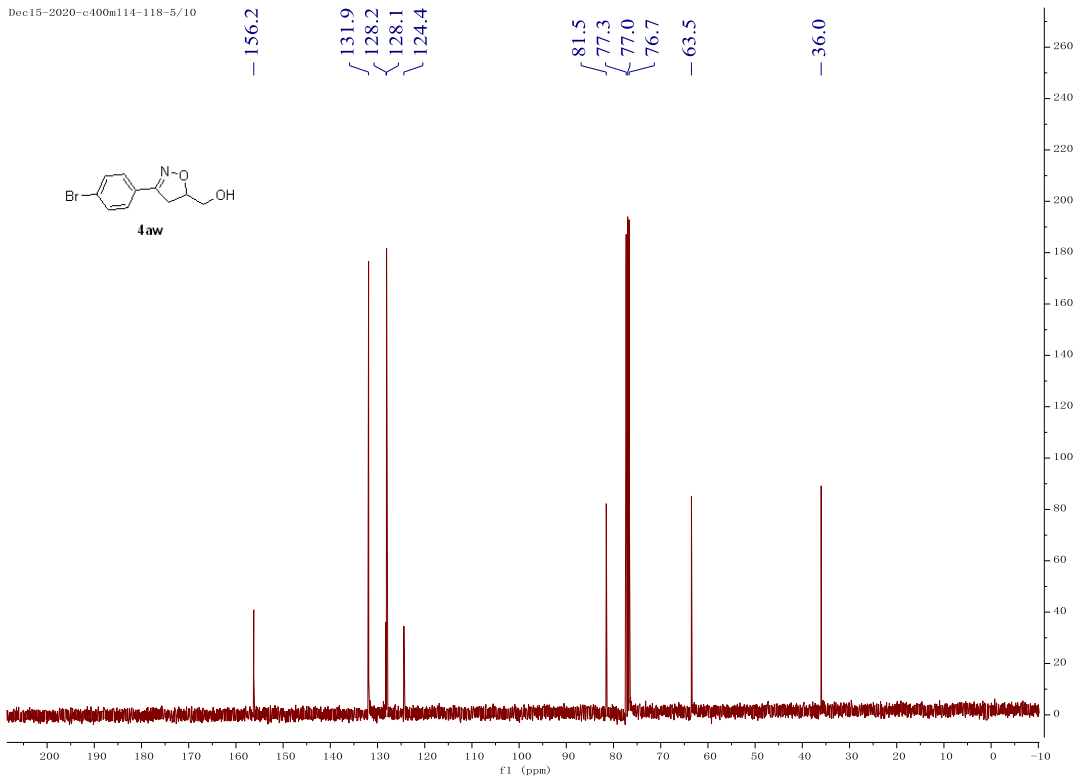

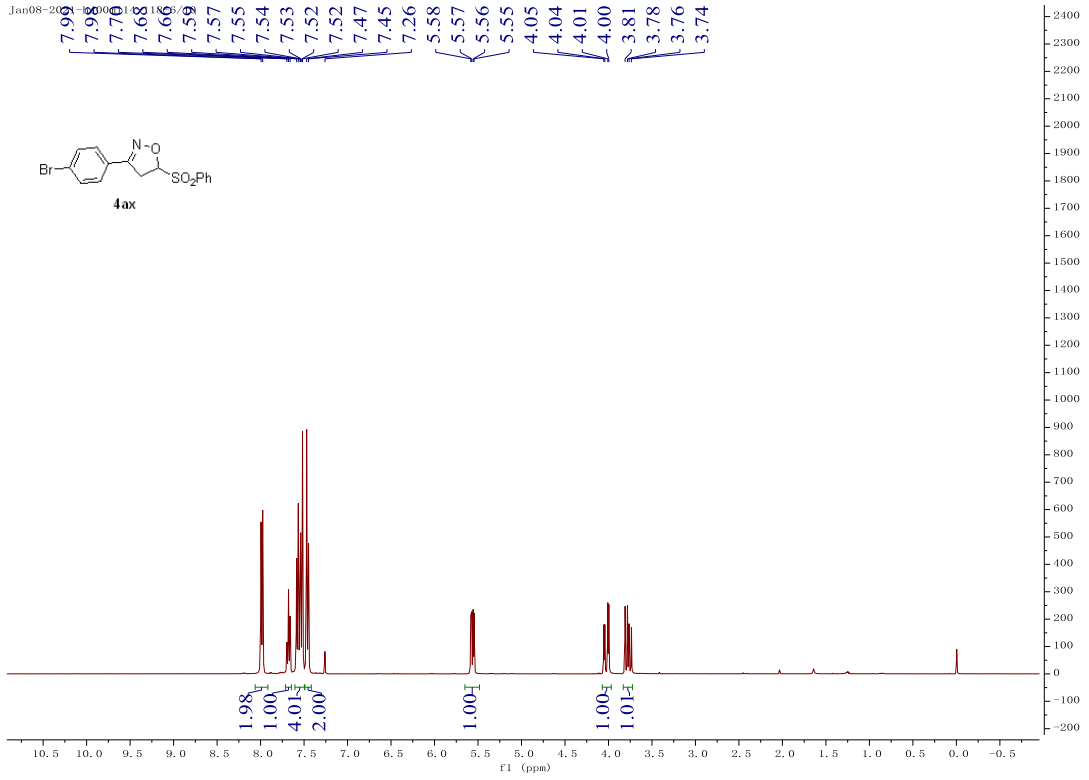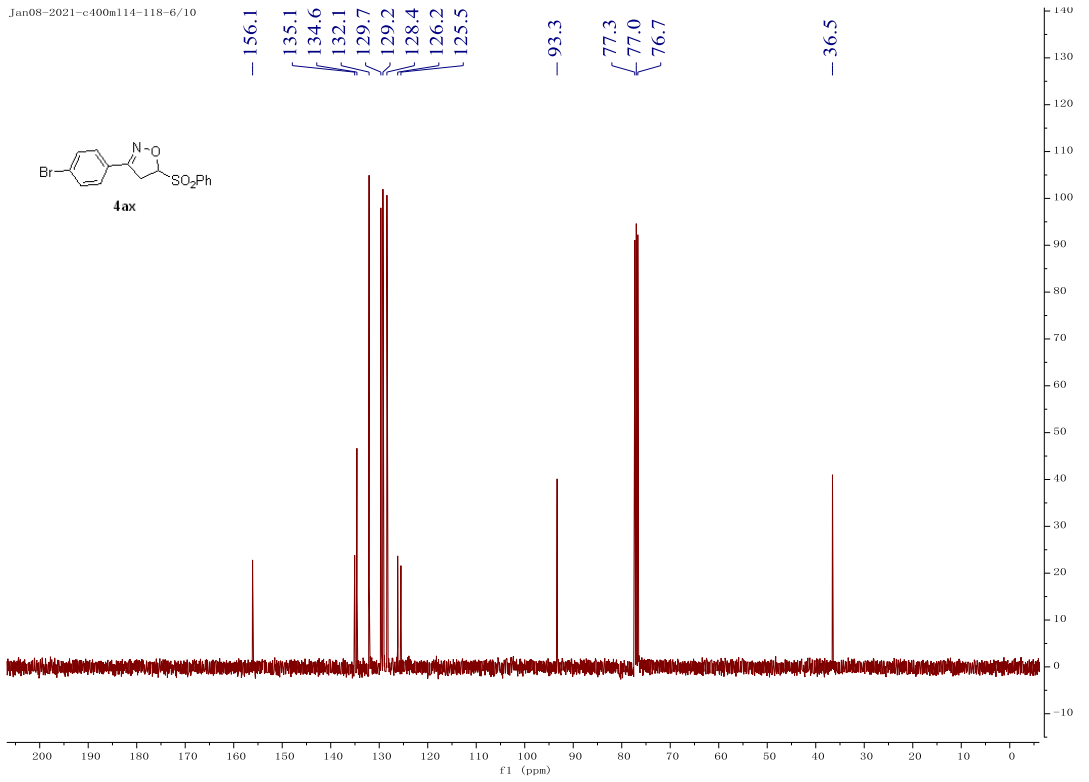

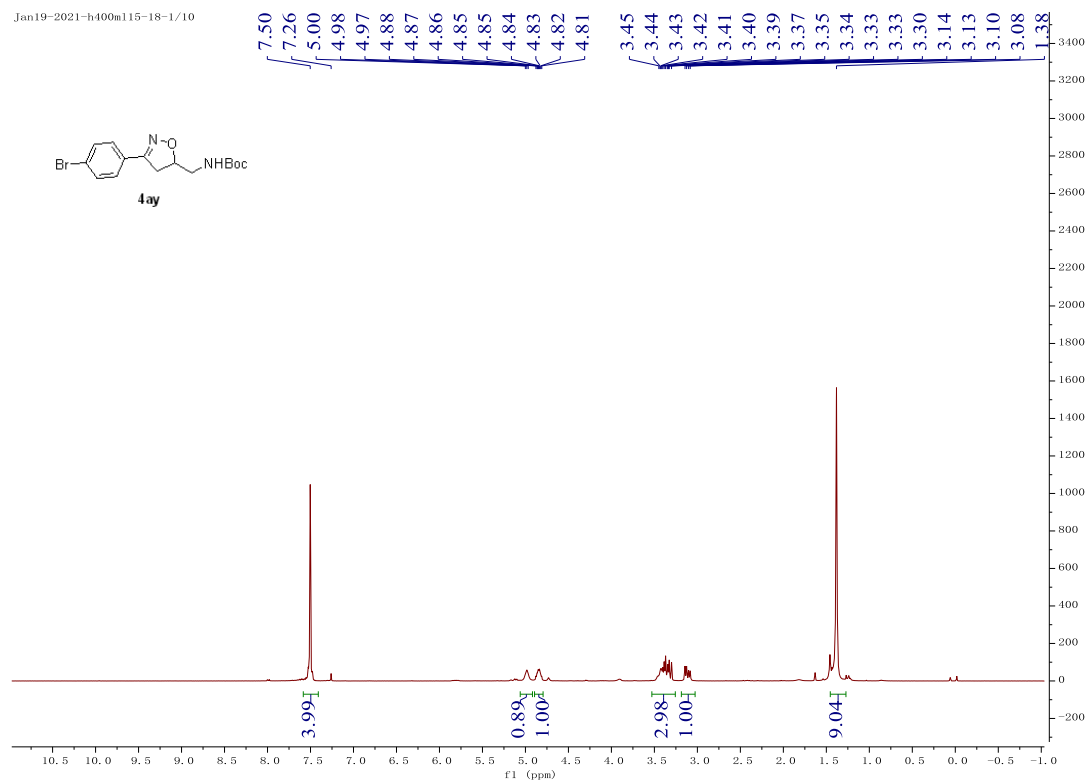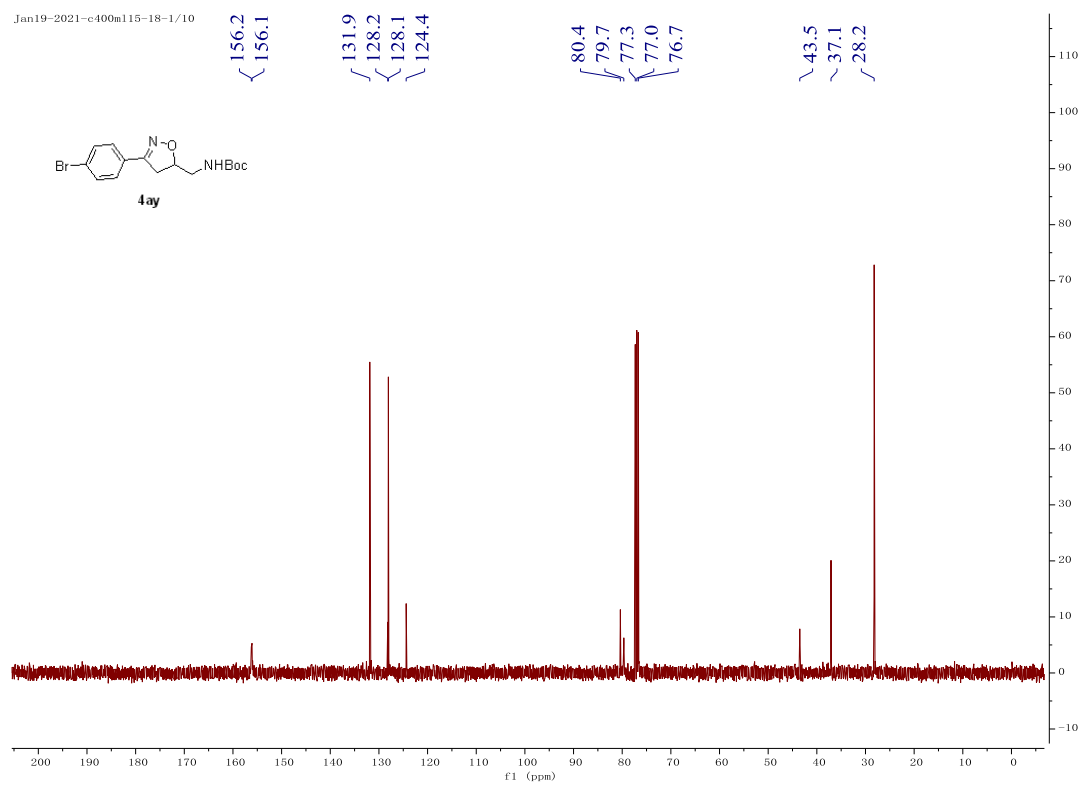

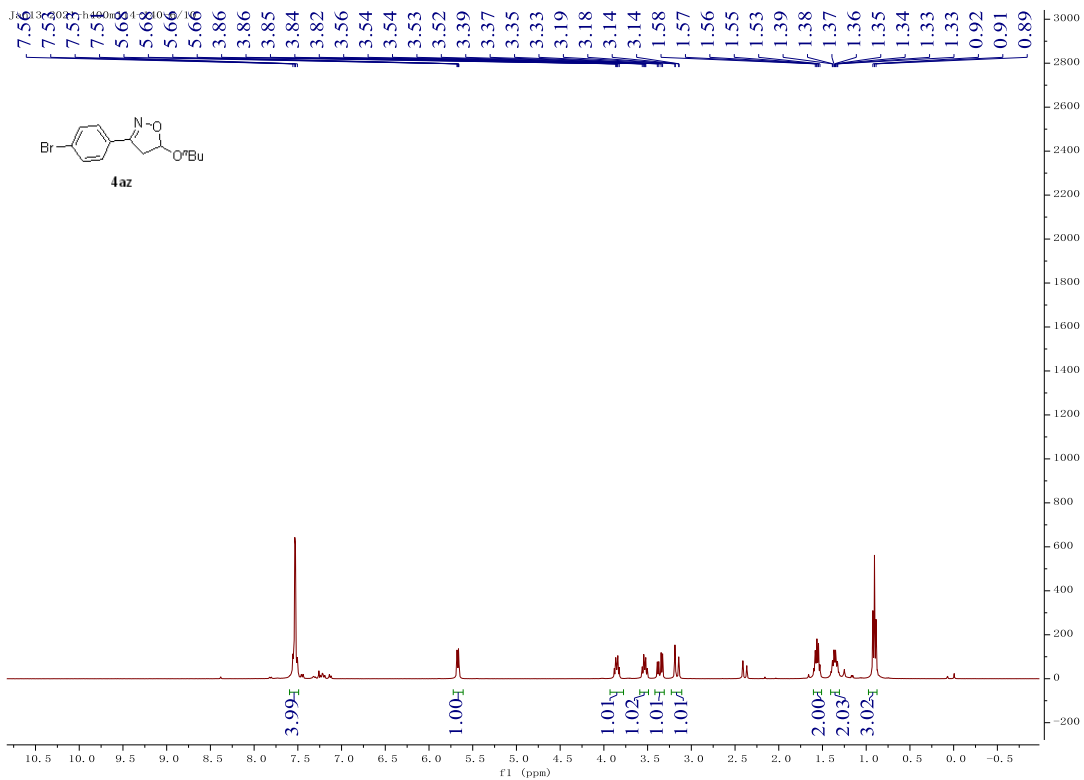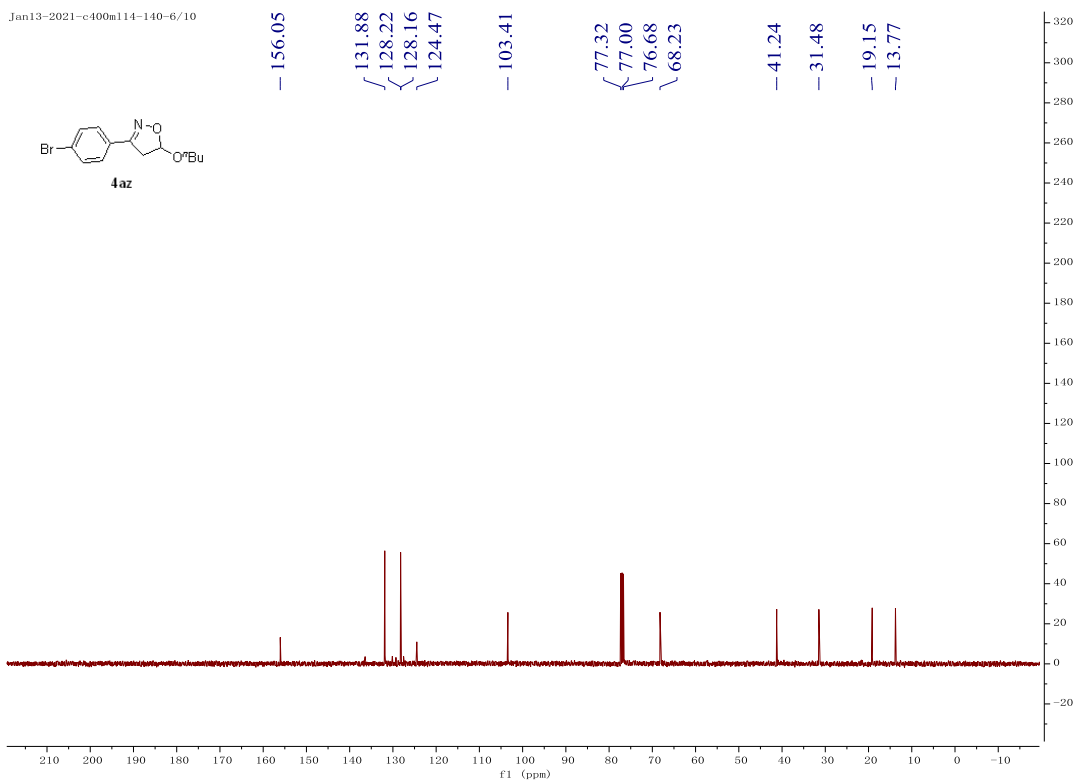

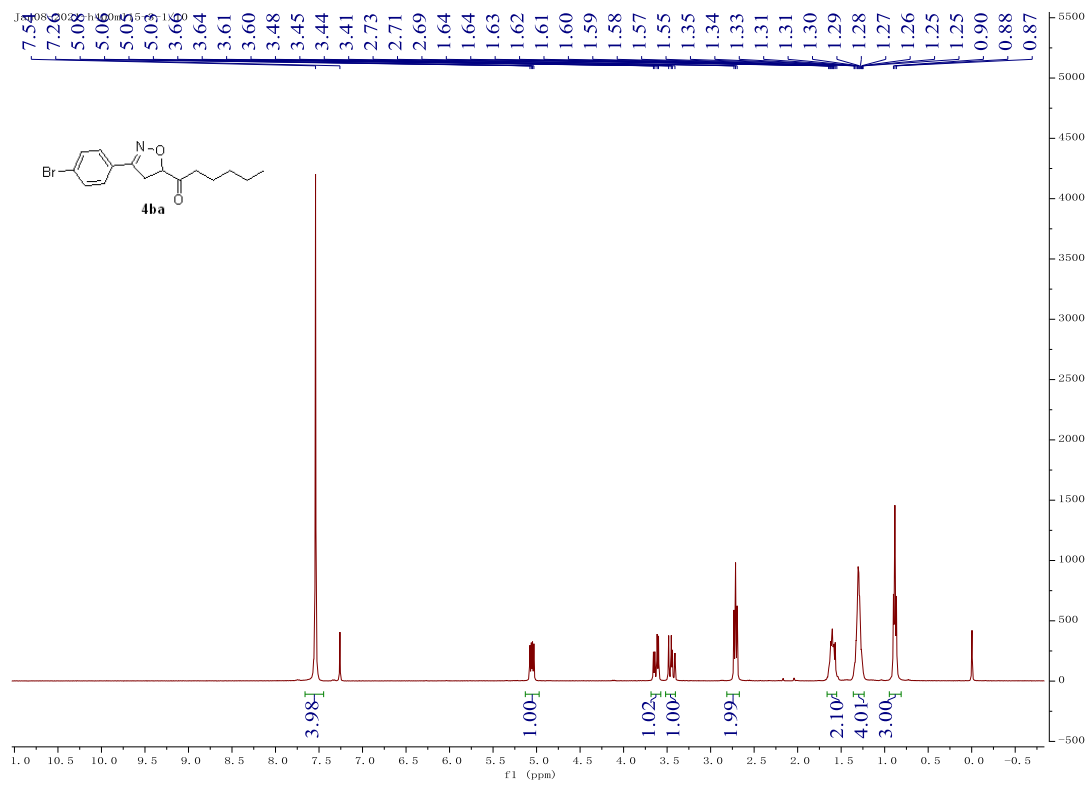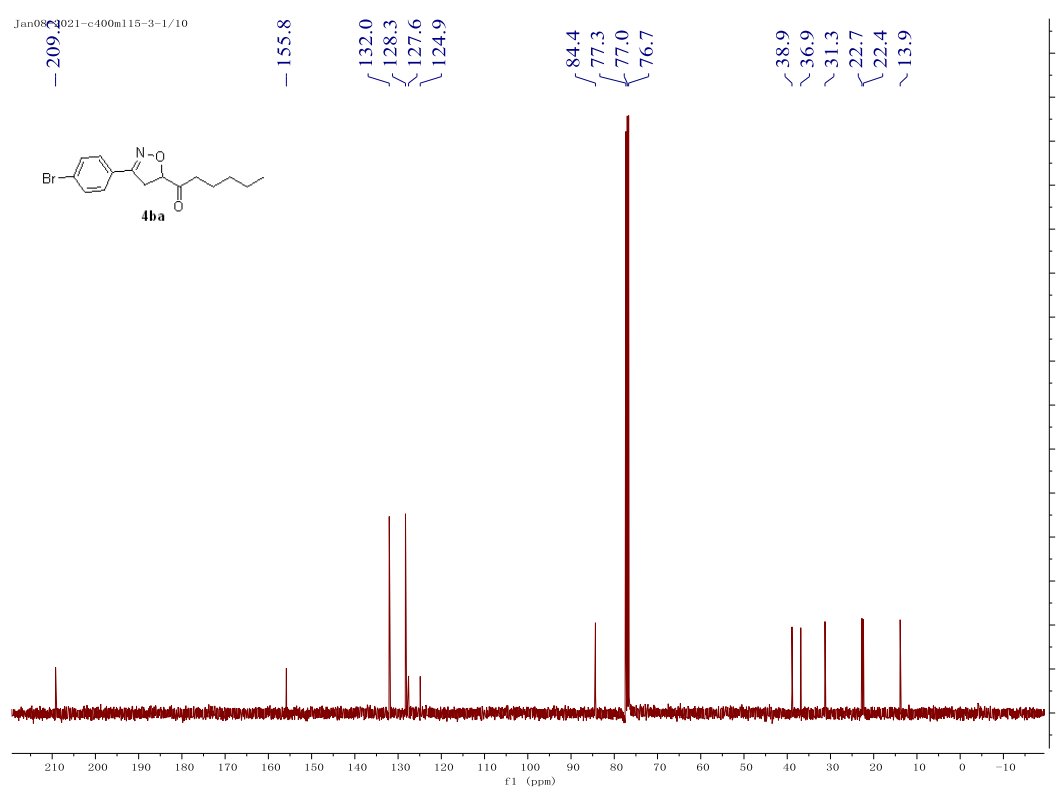

Jan08-2021-h400m115-4-3/10

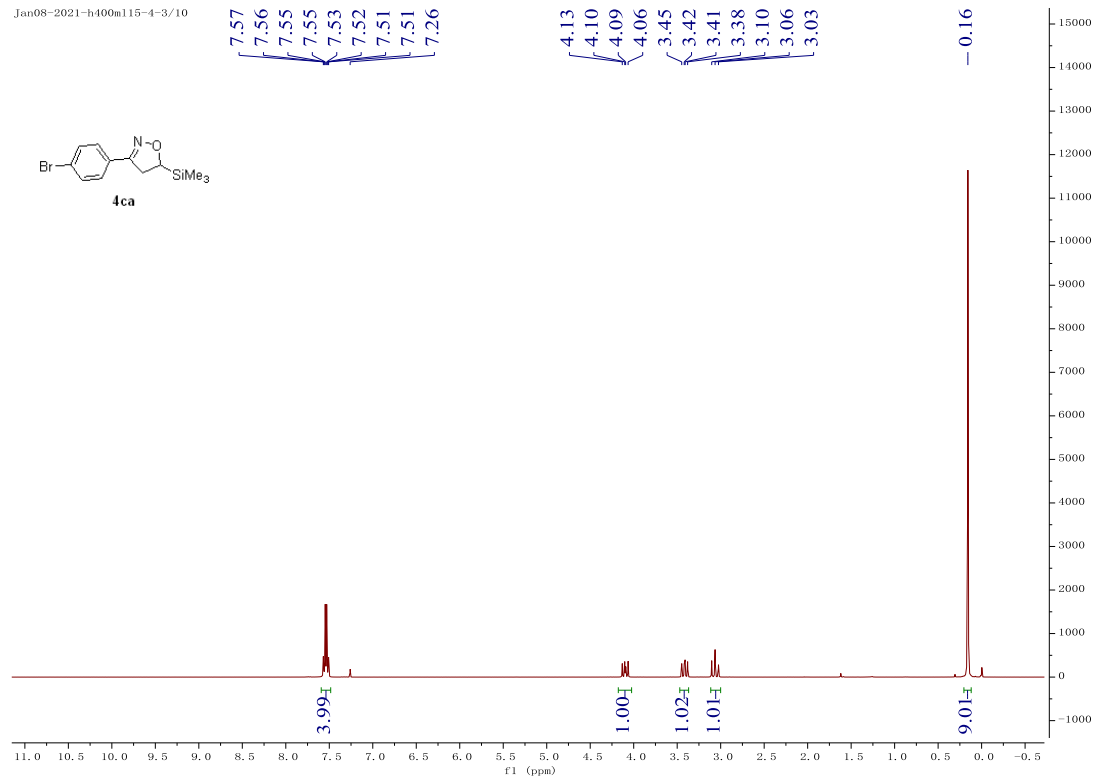

Jan08-2021-c400m115-4-3/10

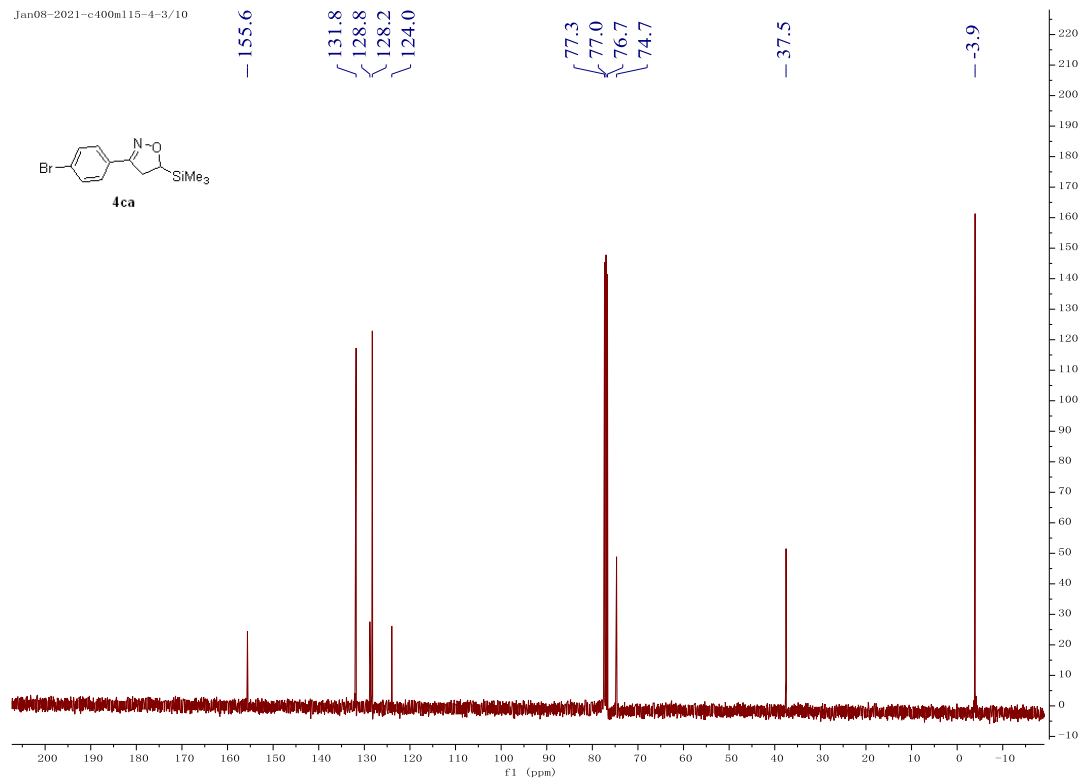

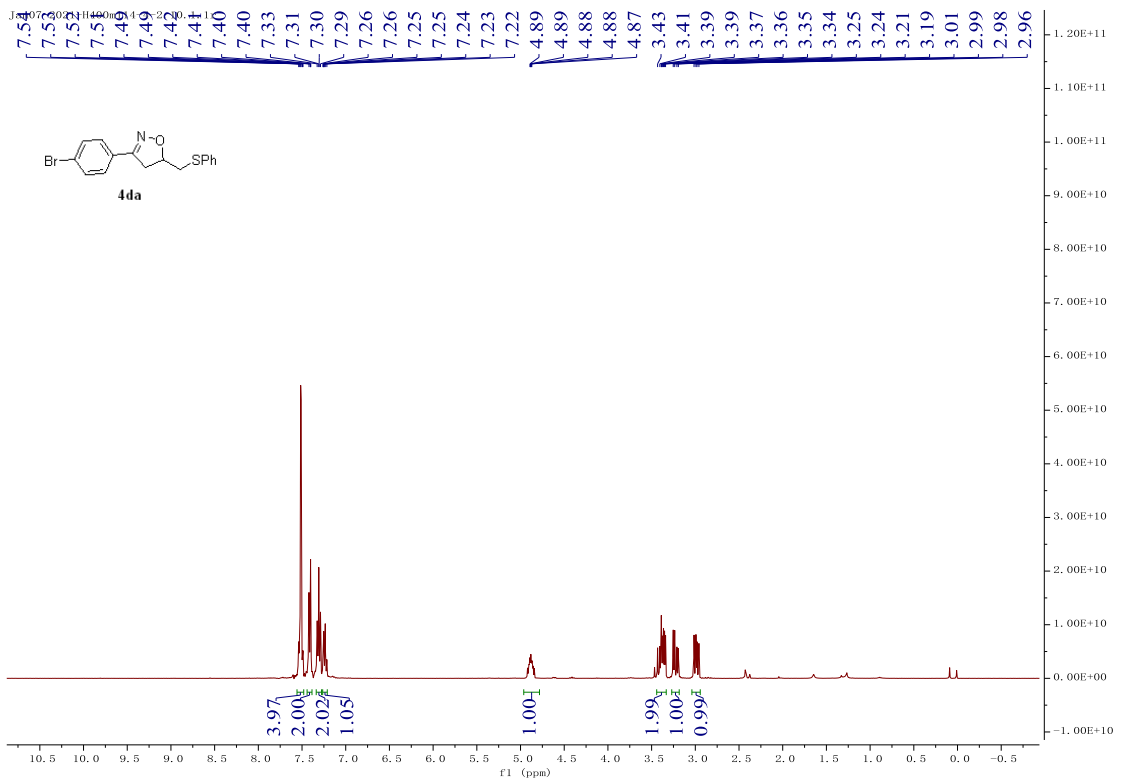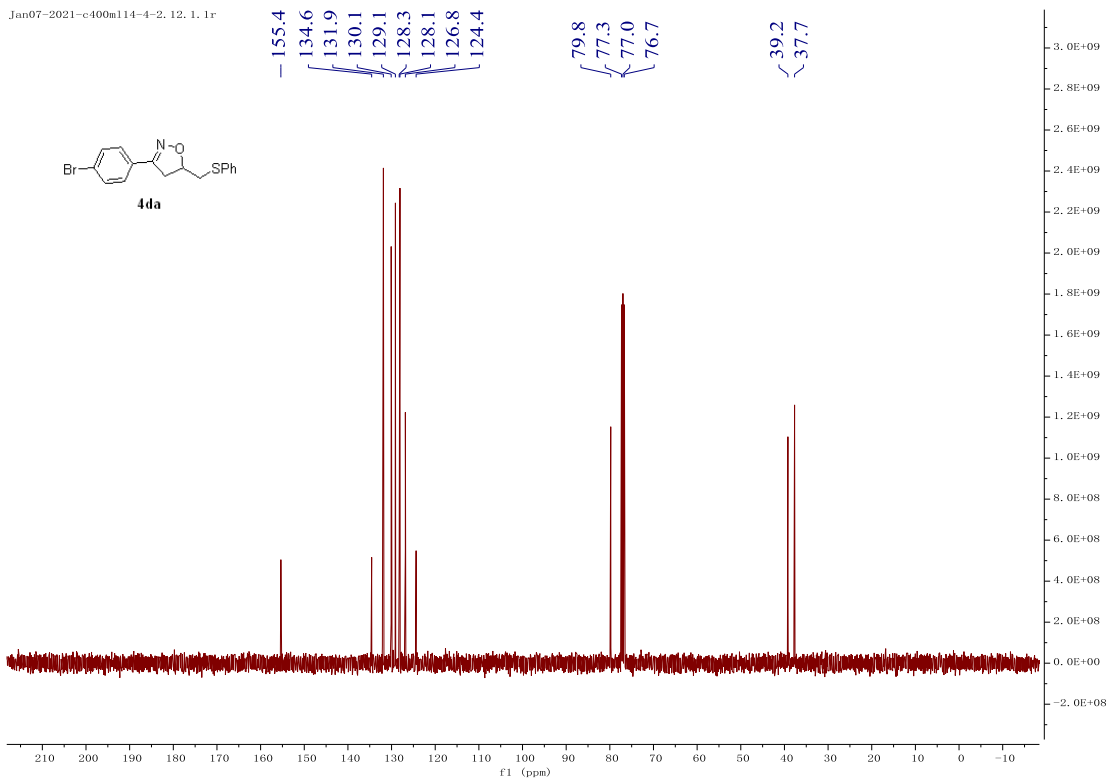

Jan18-2021-h400-m1-15-3

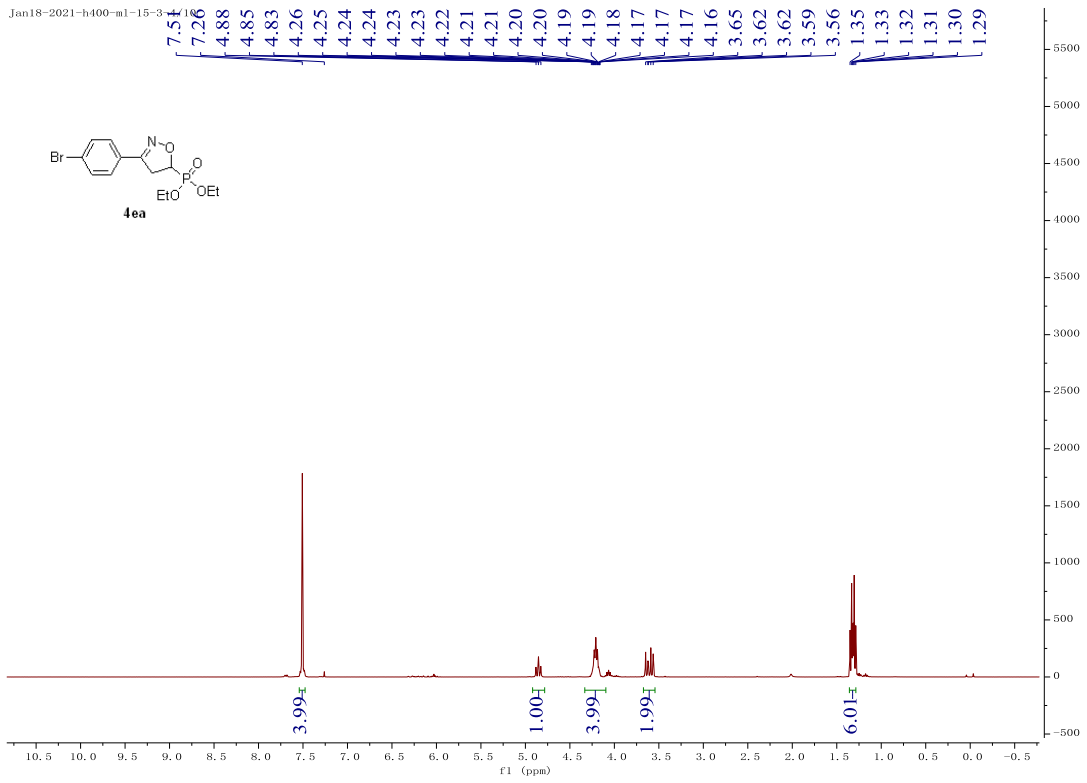

Jan18-2021-c400-m1-15-3-4/10

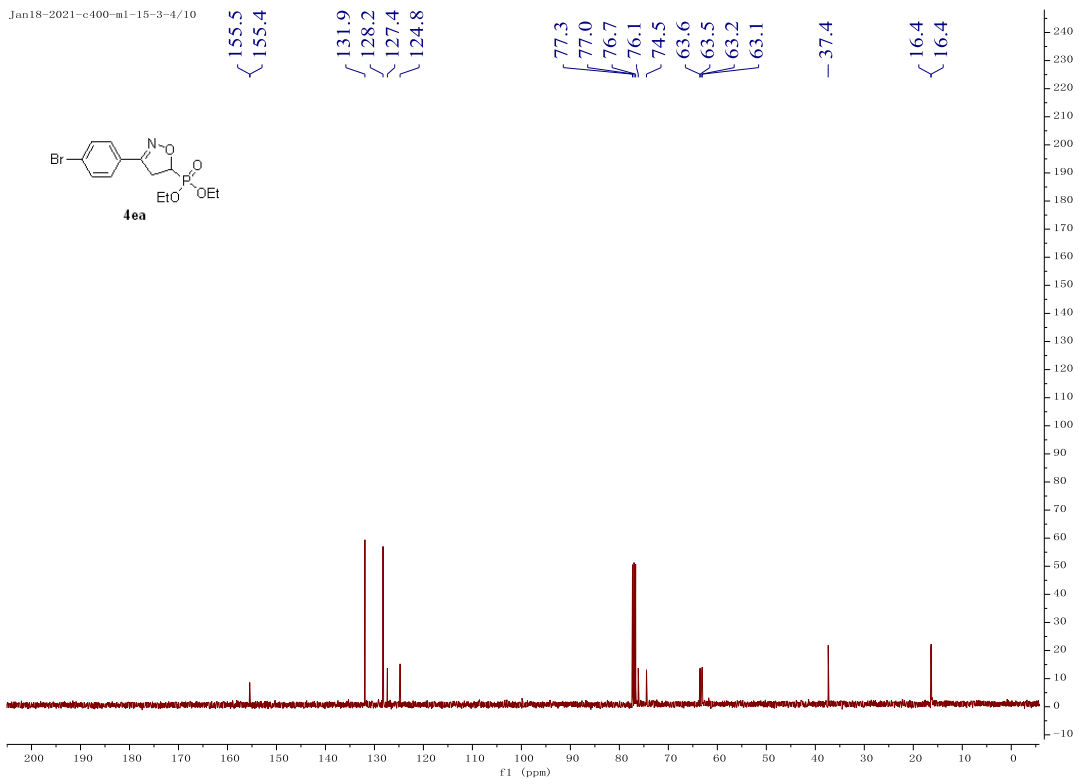



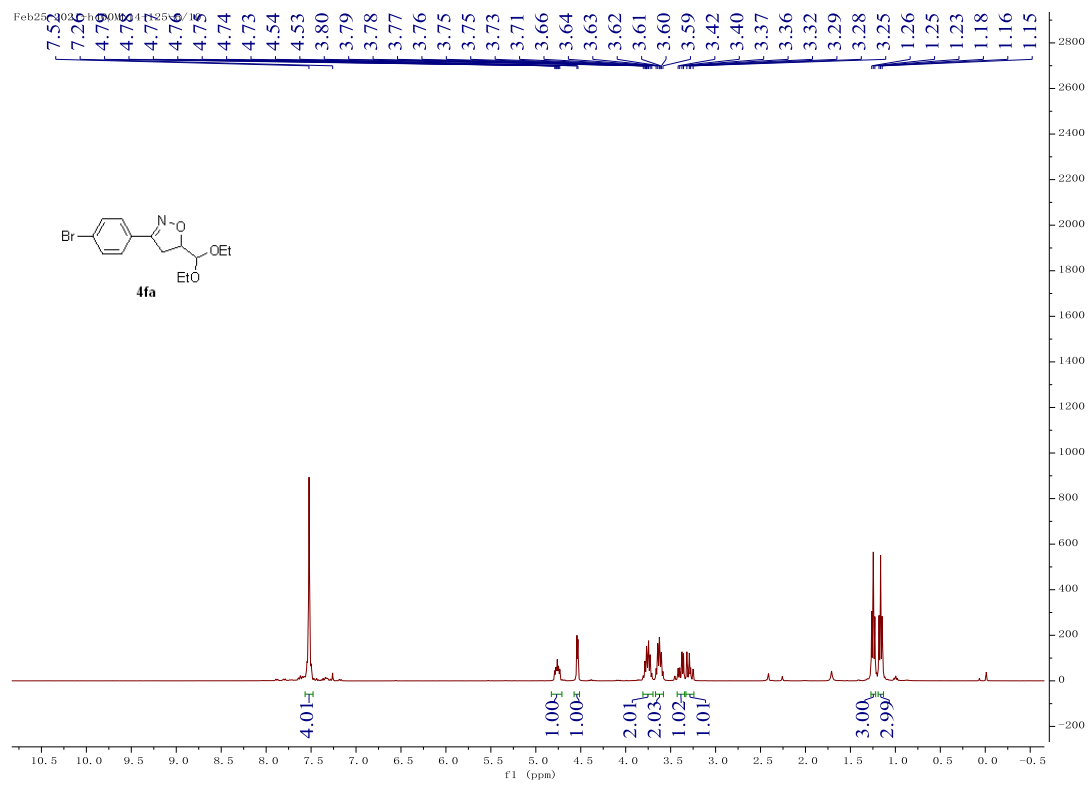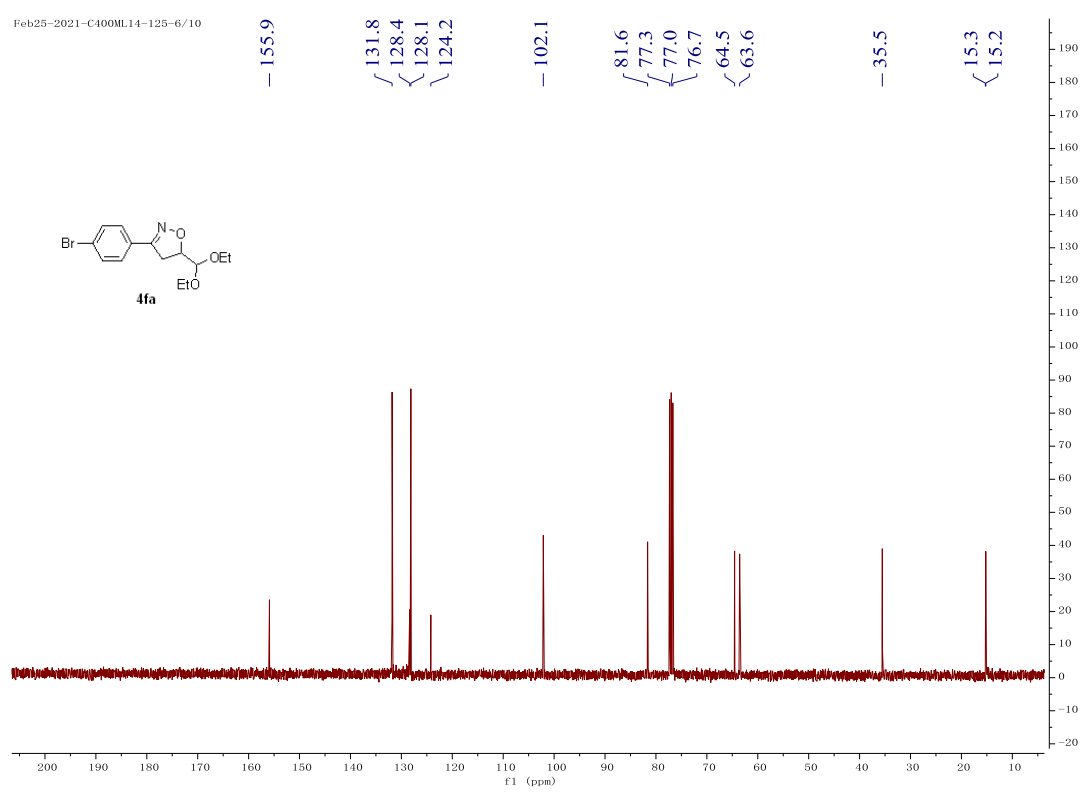

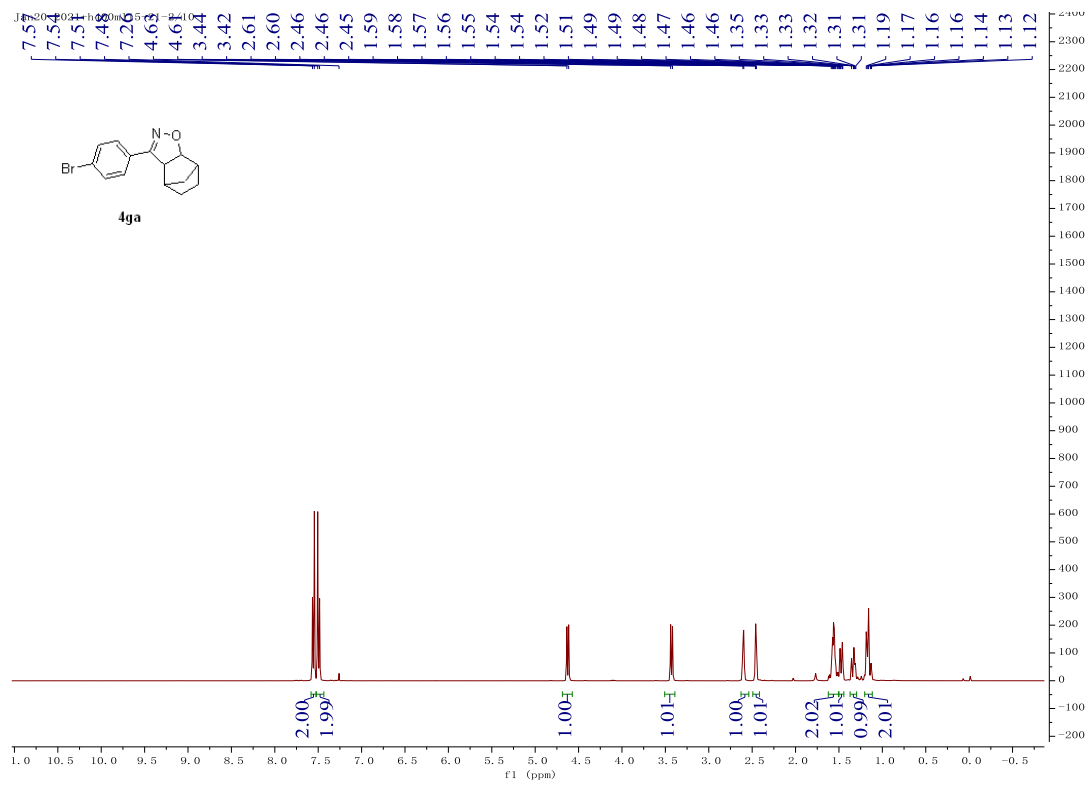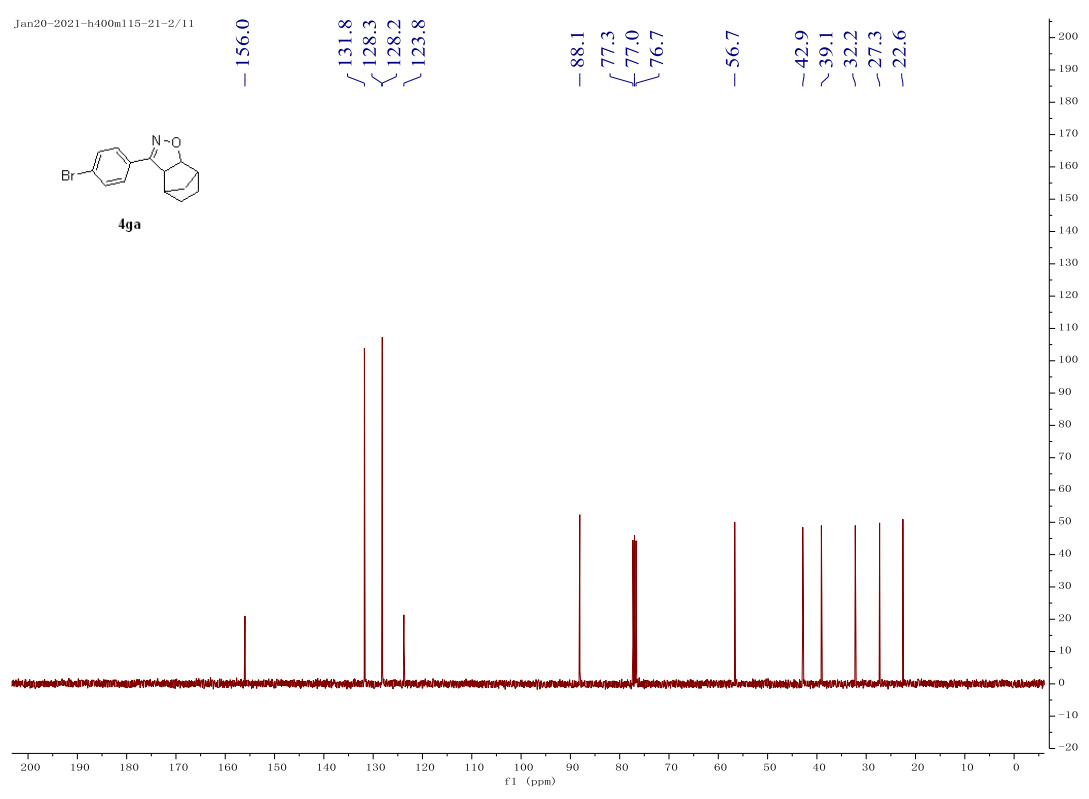

Mar05-2021-h400-ML15-48-3/10

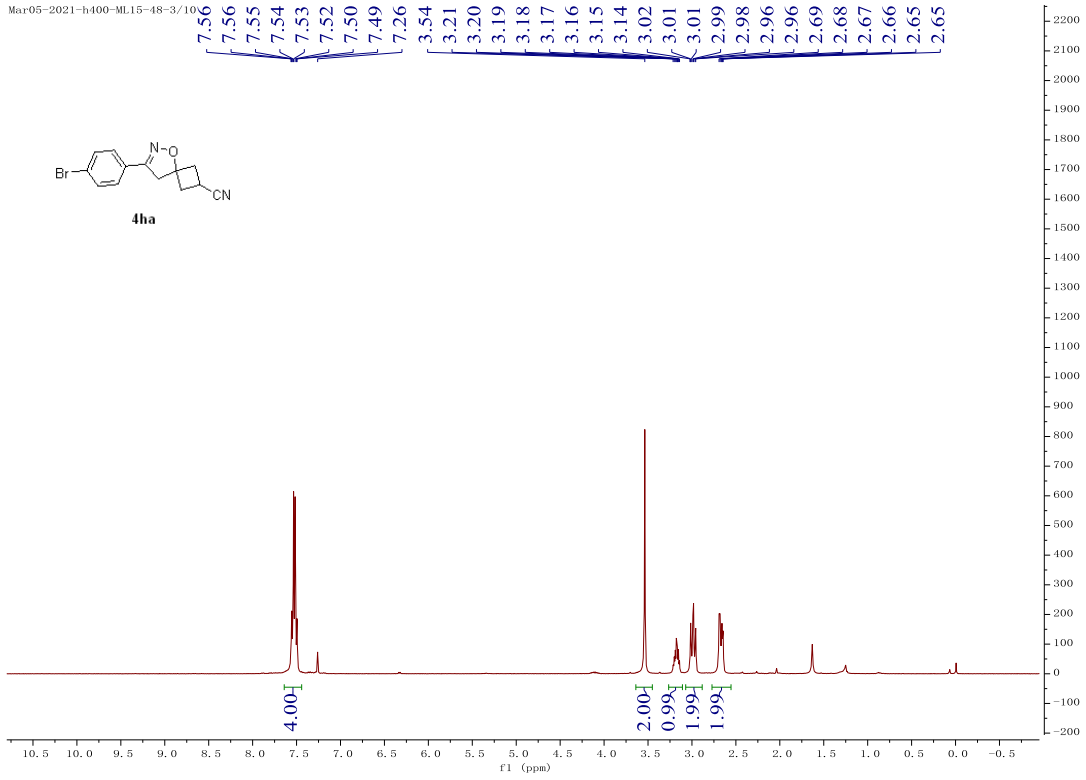

Mar05-2021-C400-ML15-48-3/10

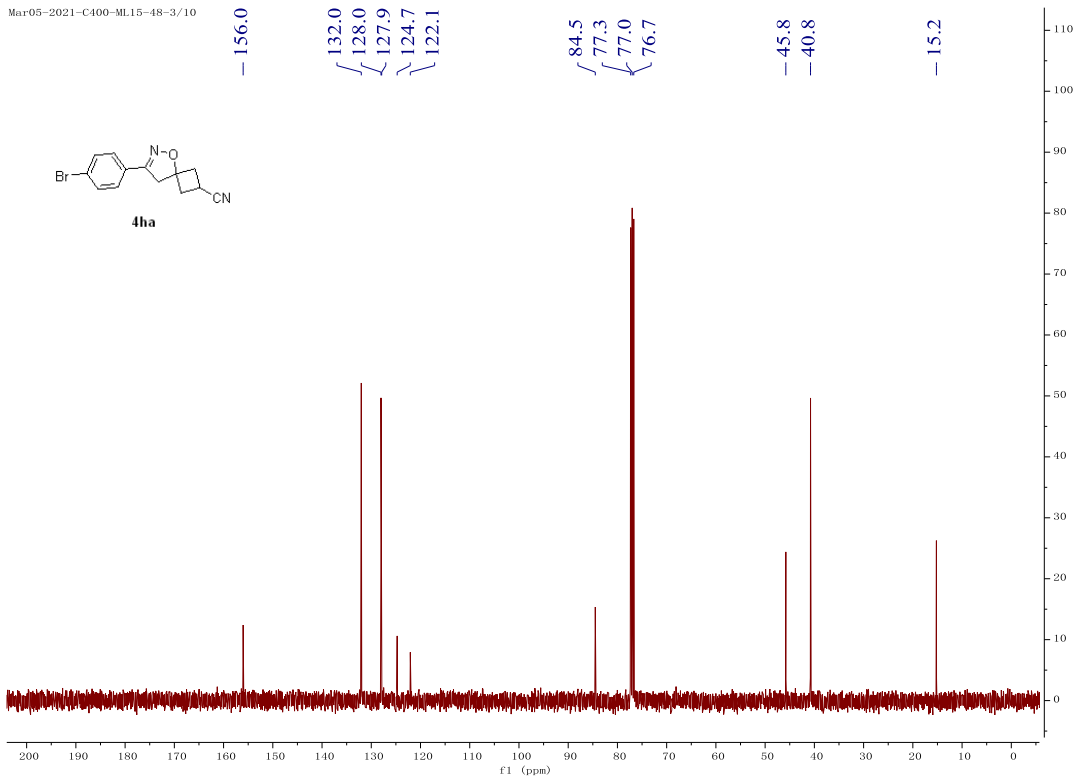

Dec11-2020-h400-ML118-7/10

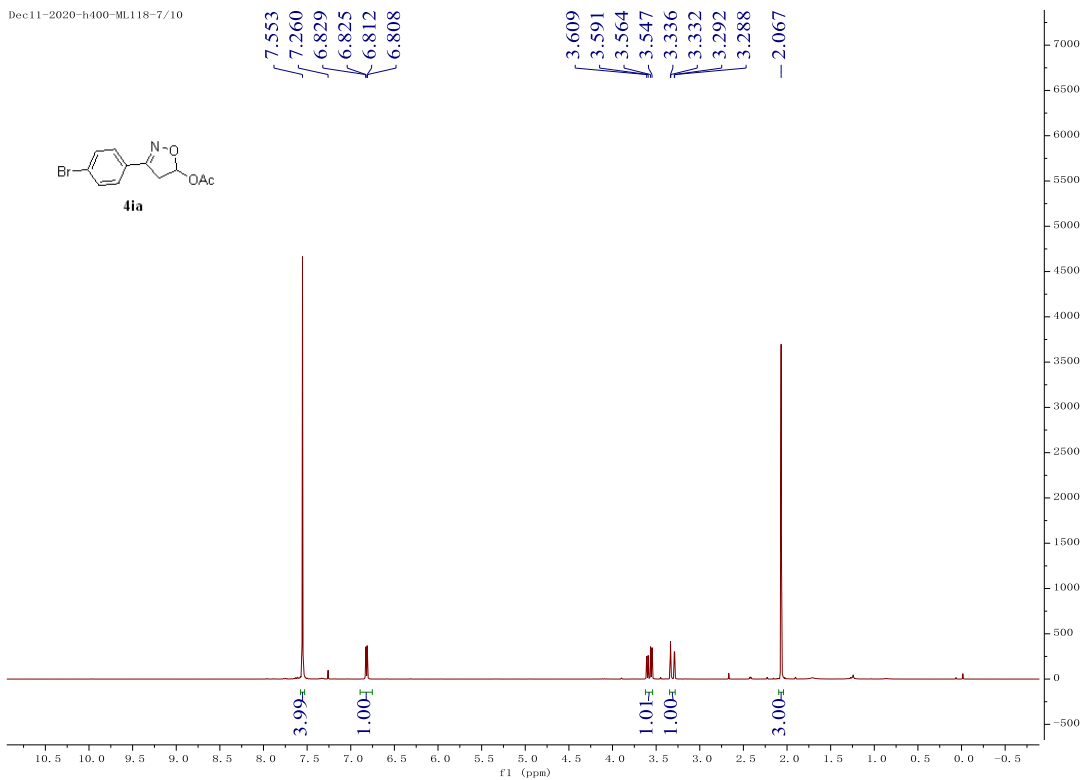

Dec11-2020-C400-ML118-7/10

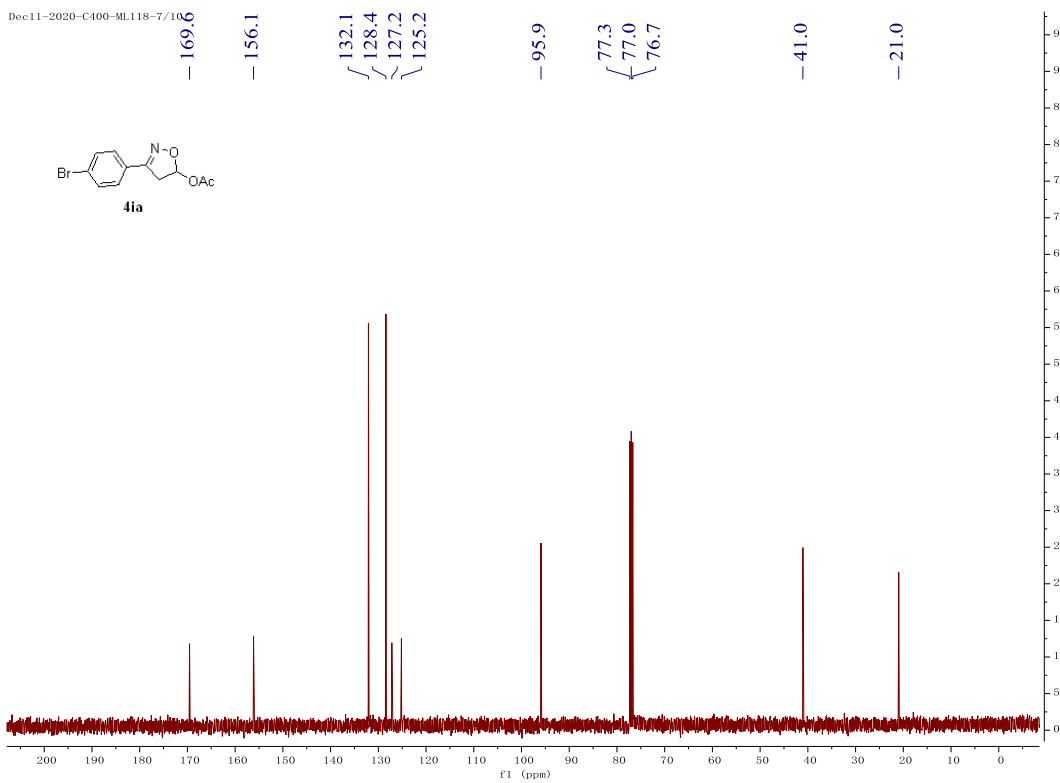

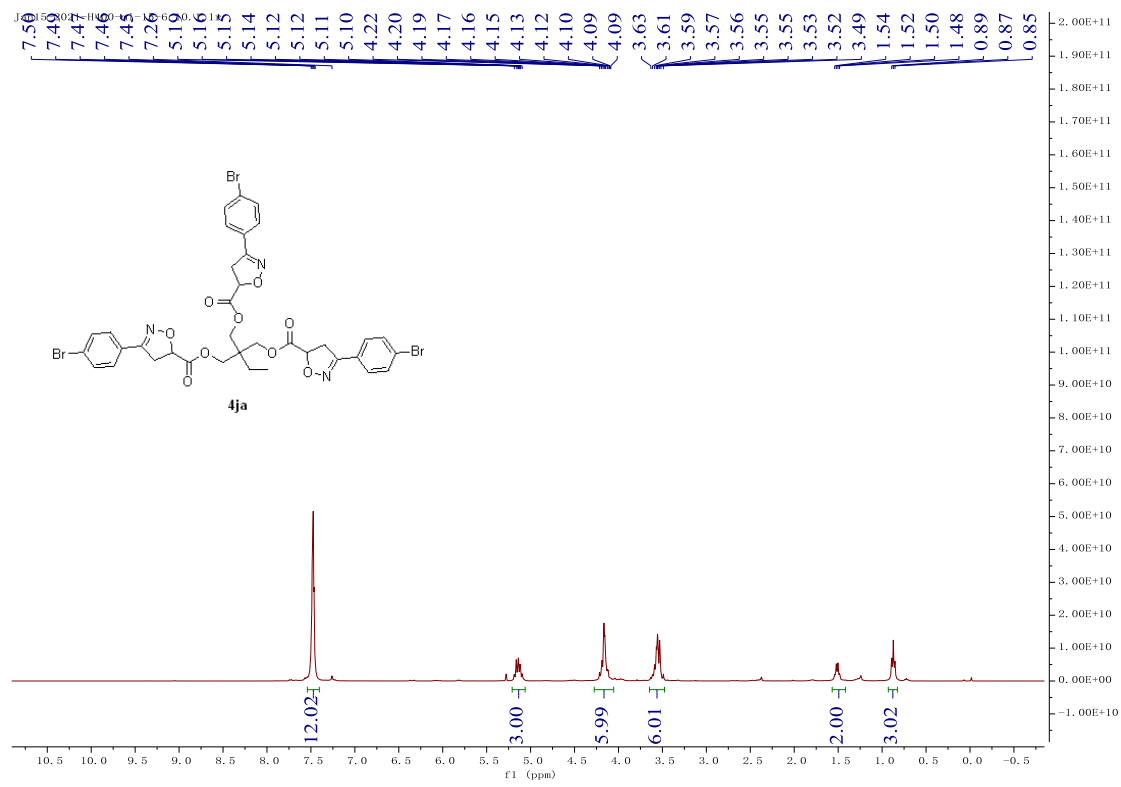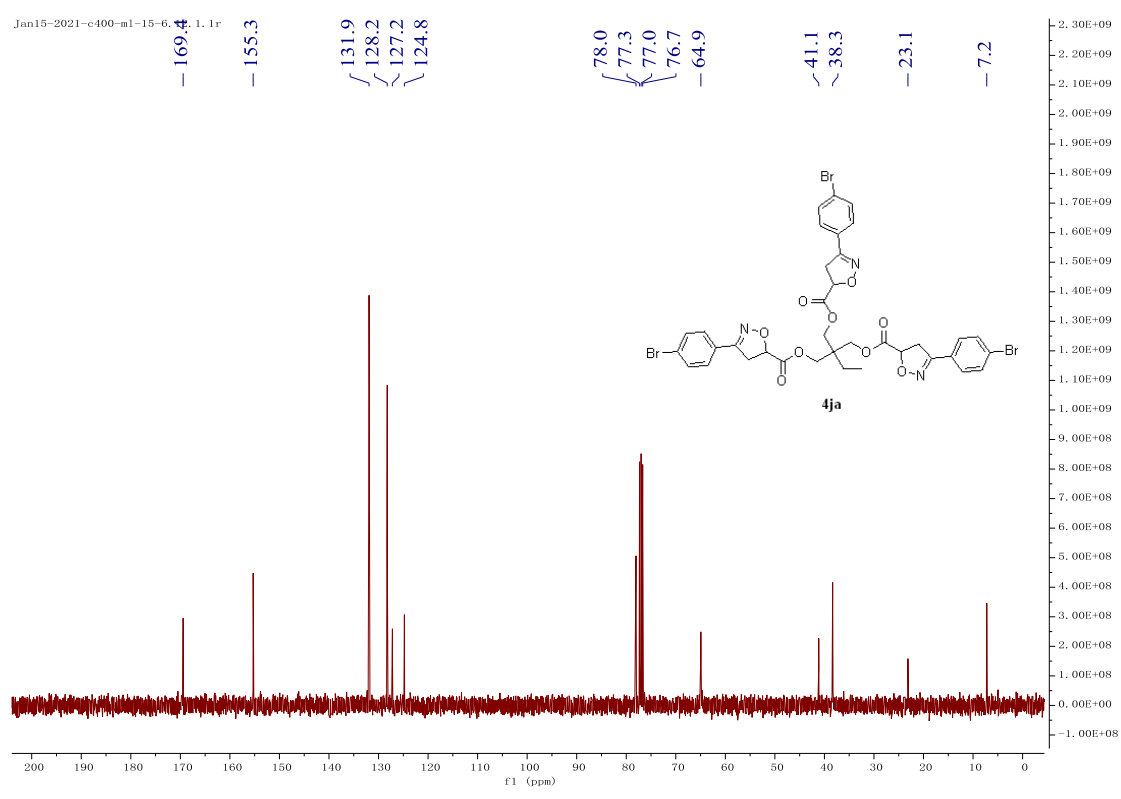

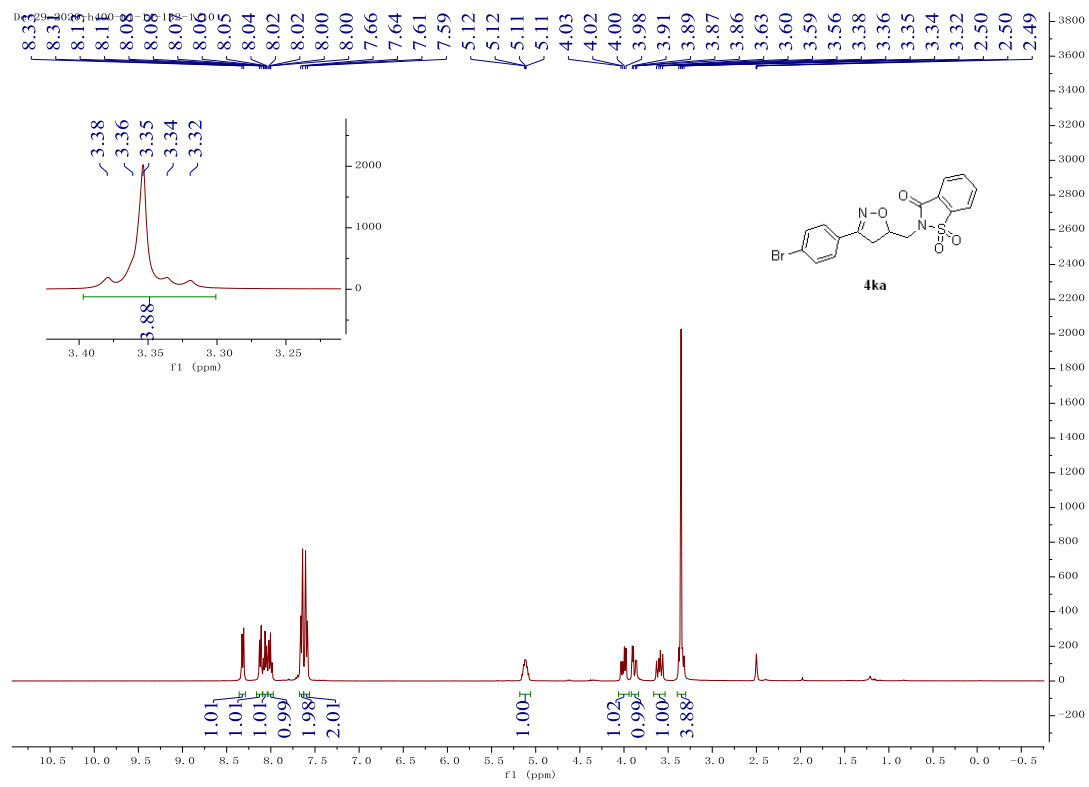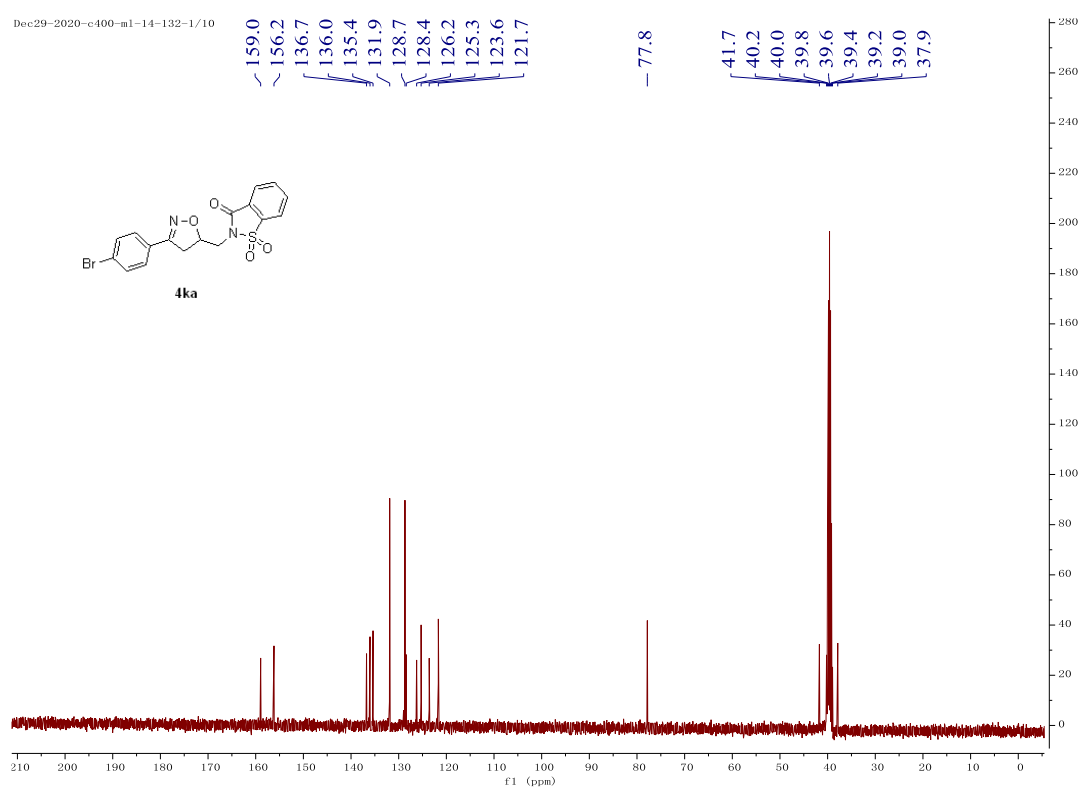

Jan12-2021-h400m114-140-2

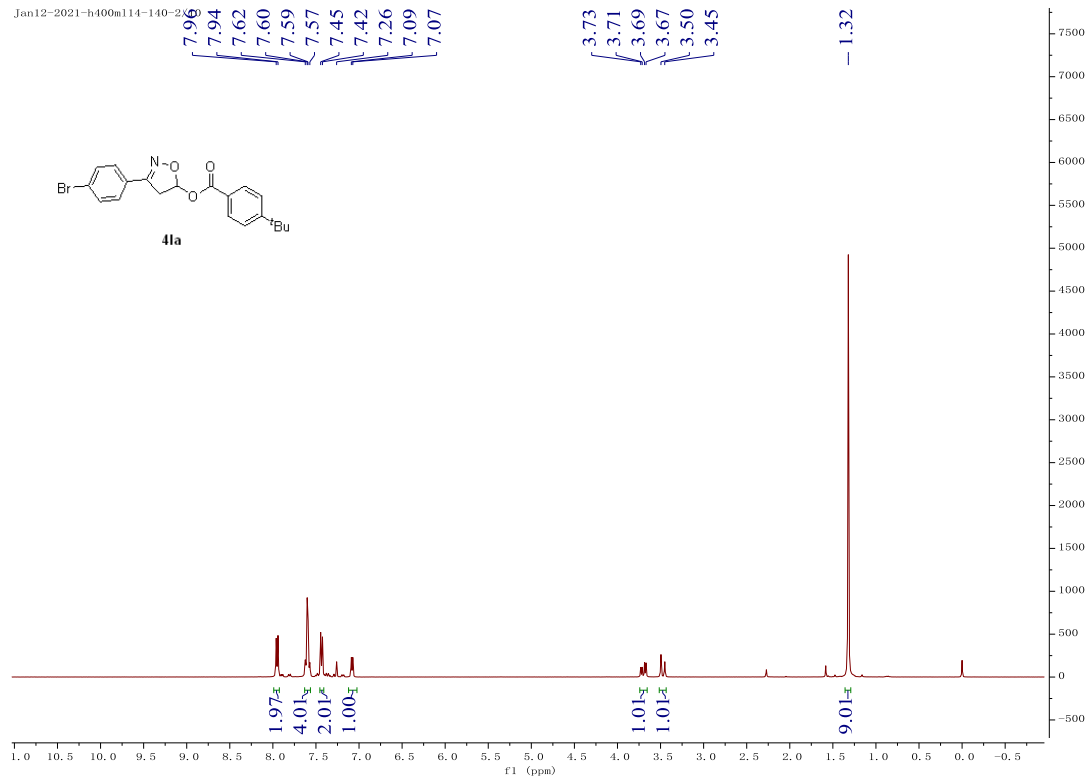

Jan12-2021-c400m114-140-2/10

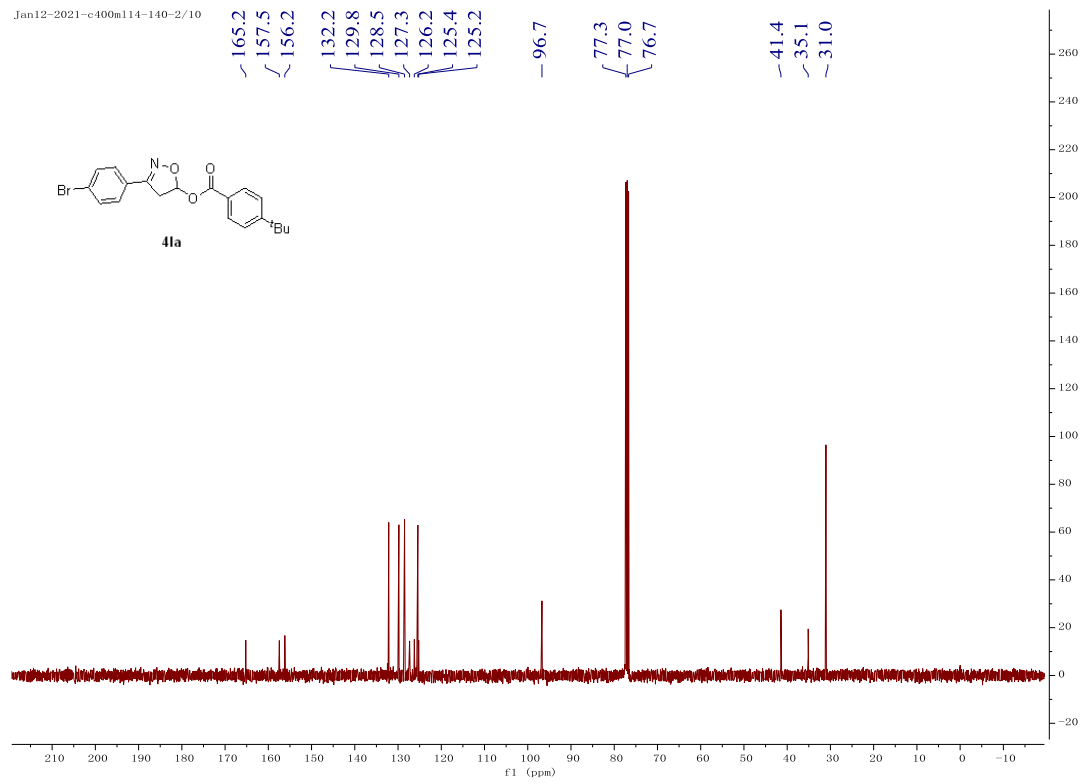

Mar04-2021-H400-m1-48-2, 10, 1, 1r

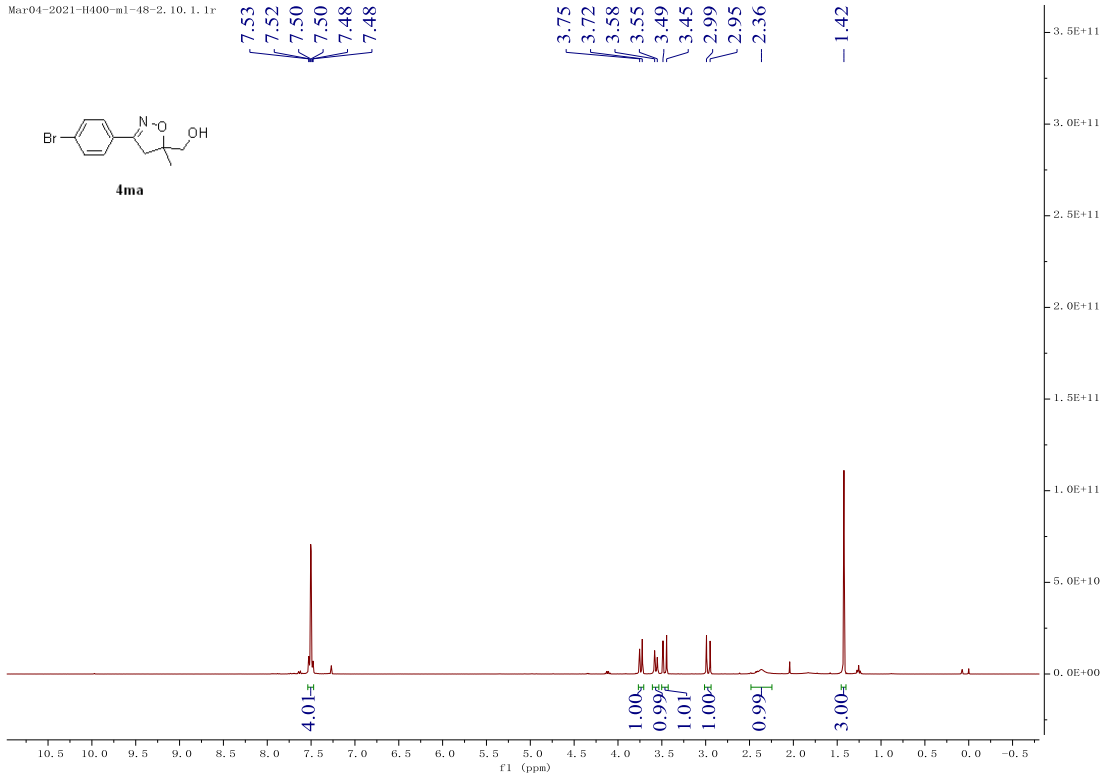

Mar04-2021-c400-m1-48-2, 10, 1, 1r

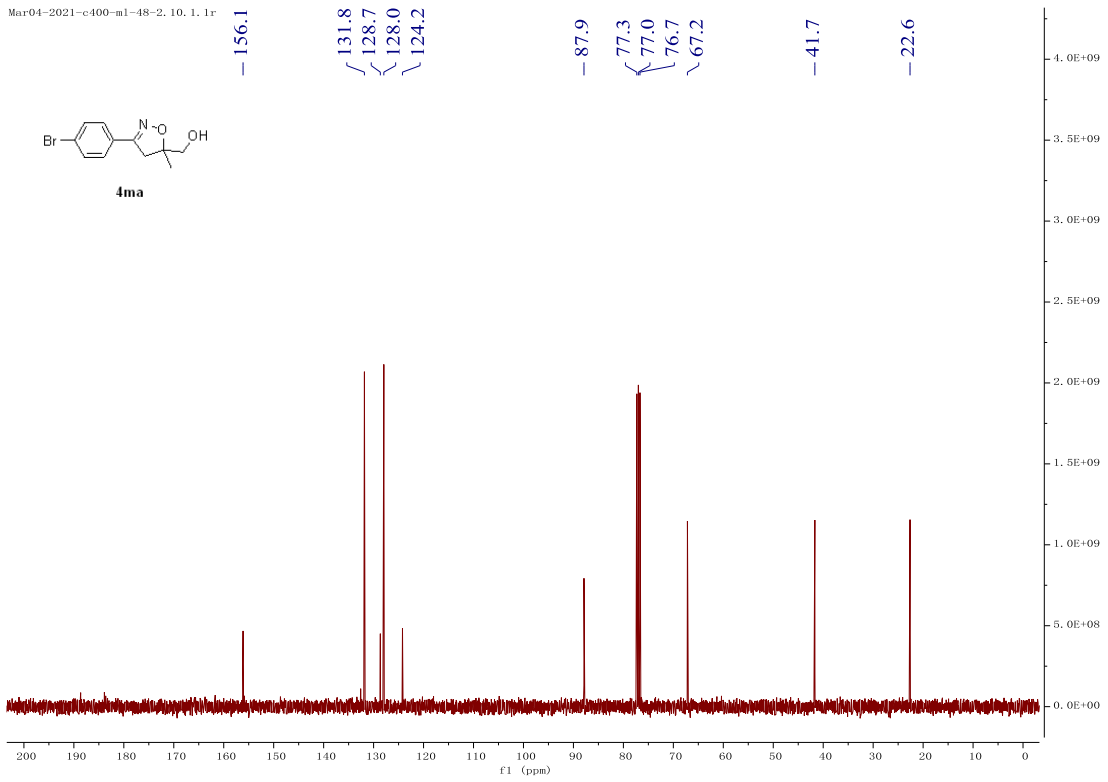



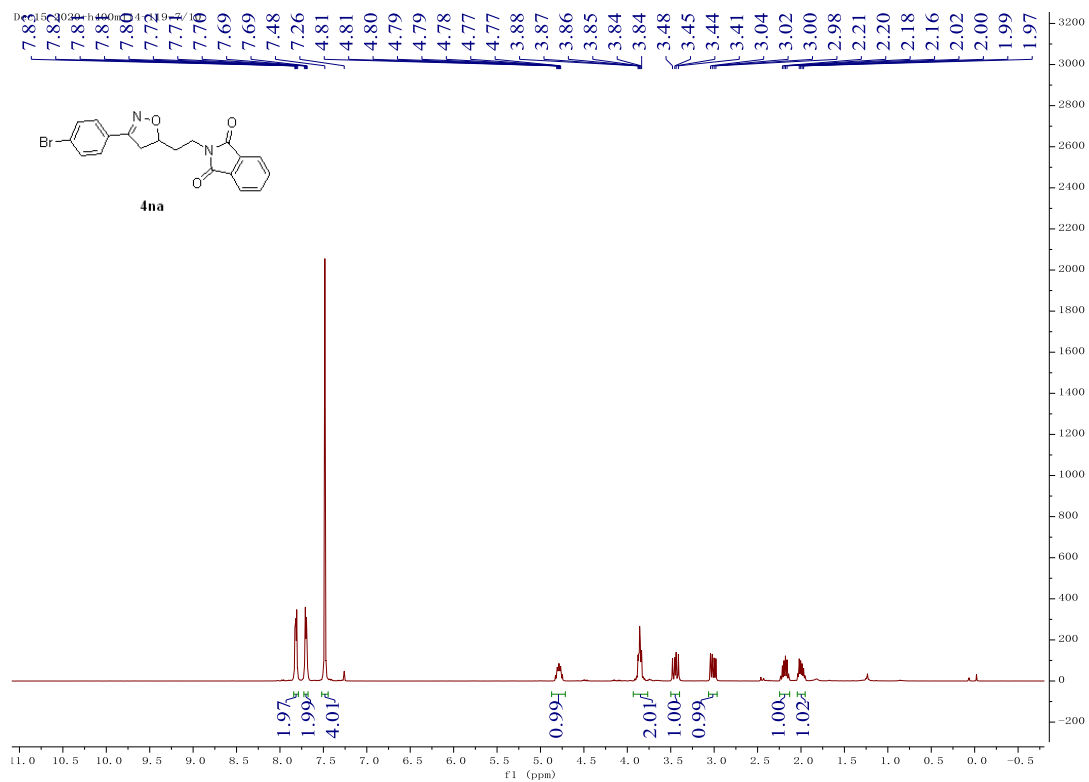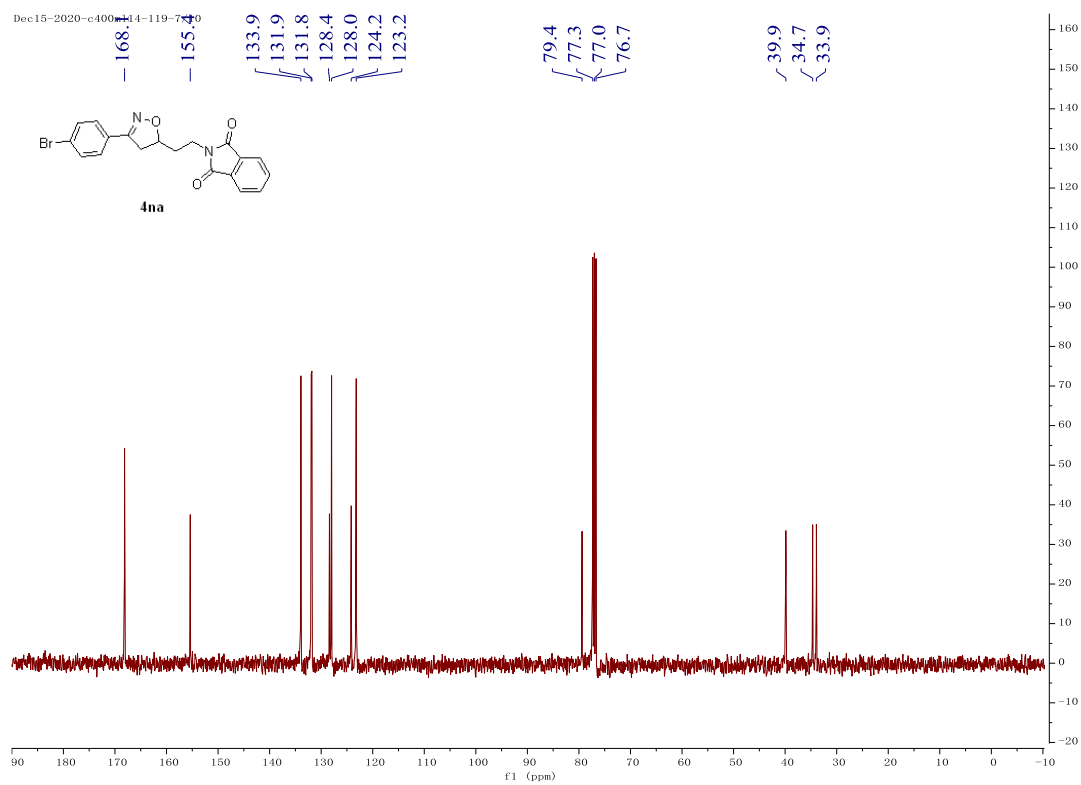

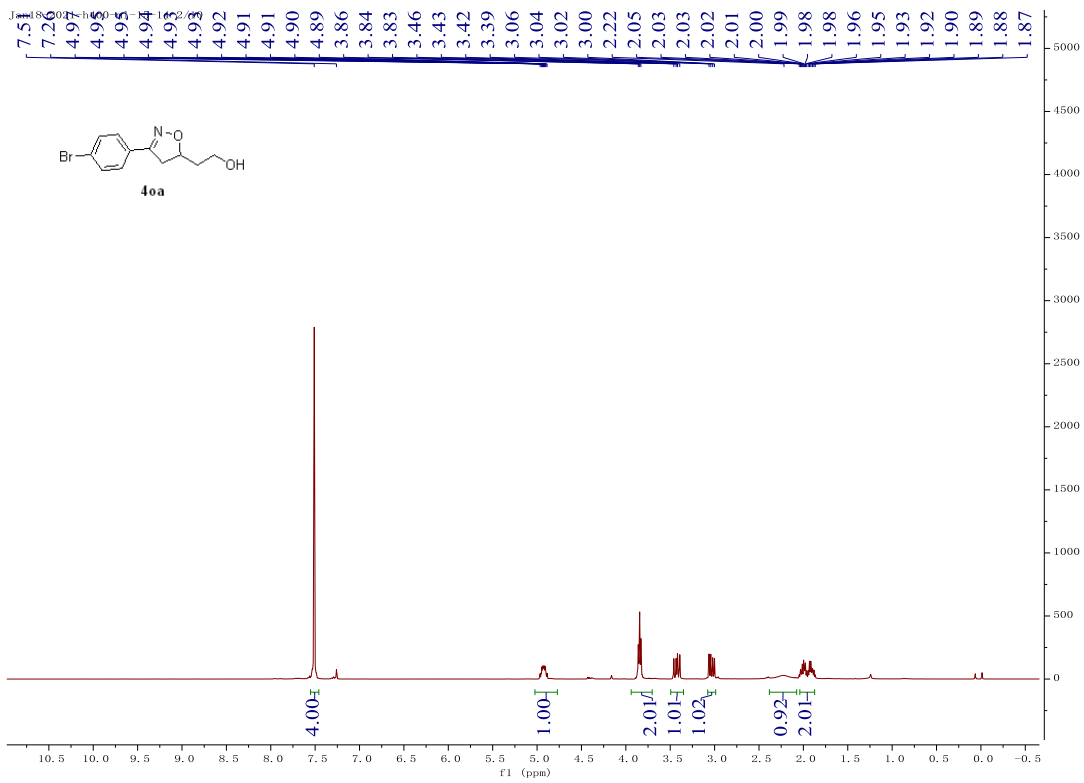

Jan18-2021-c400-ml-15-14-2/10

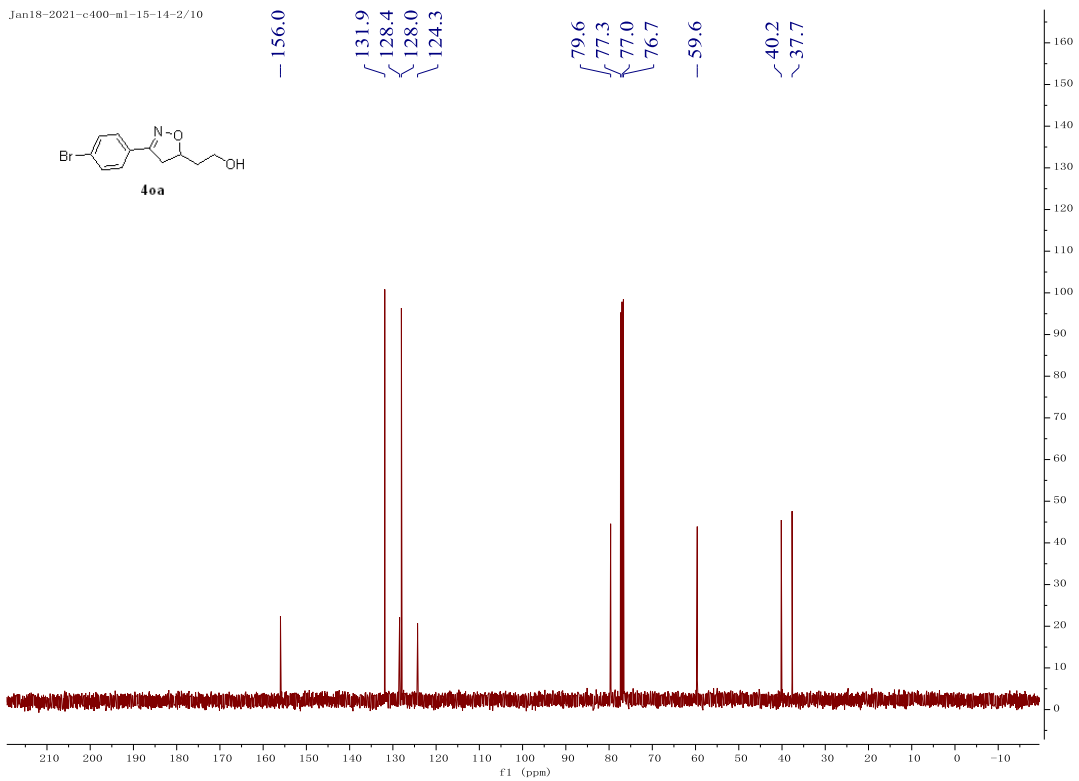

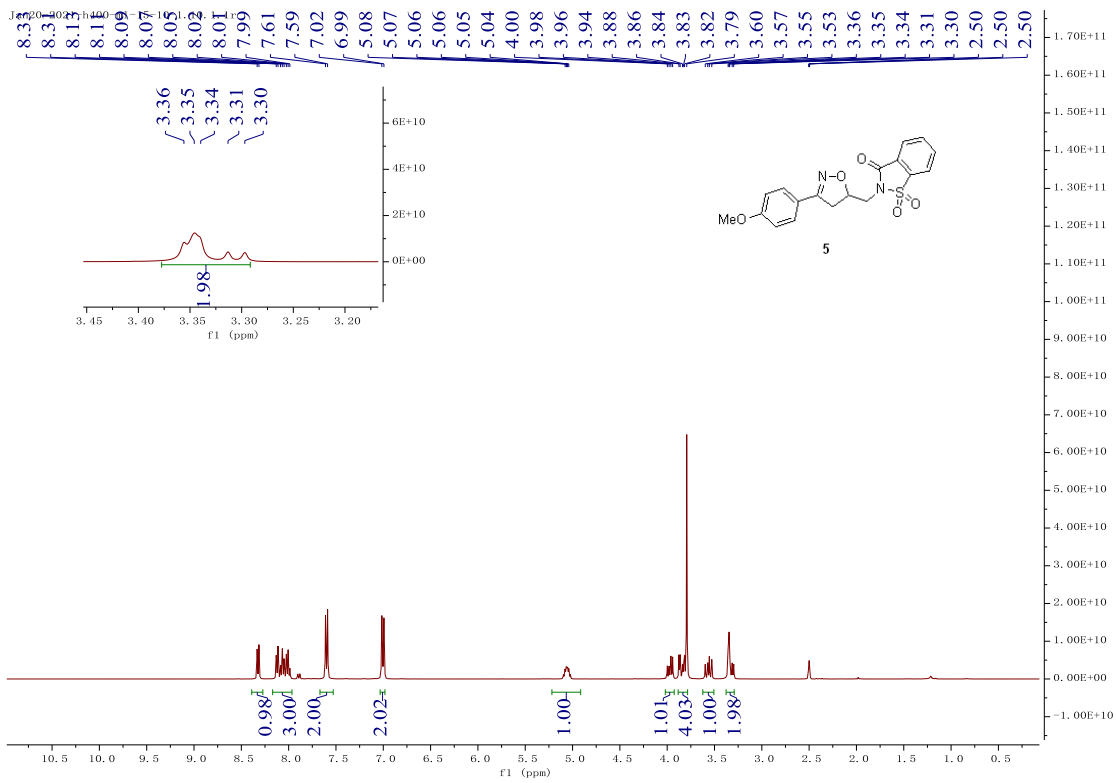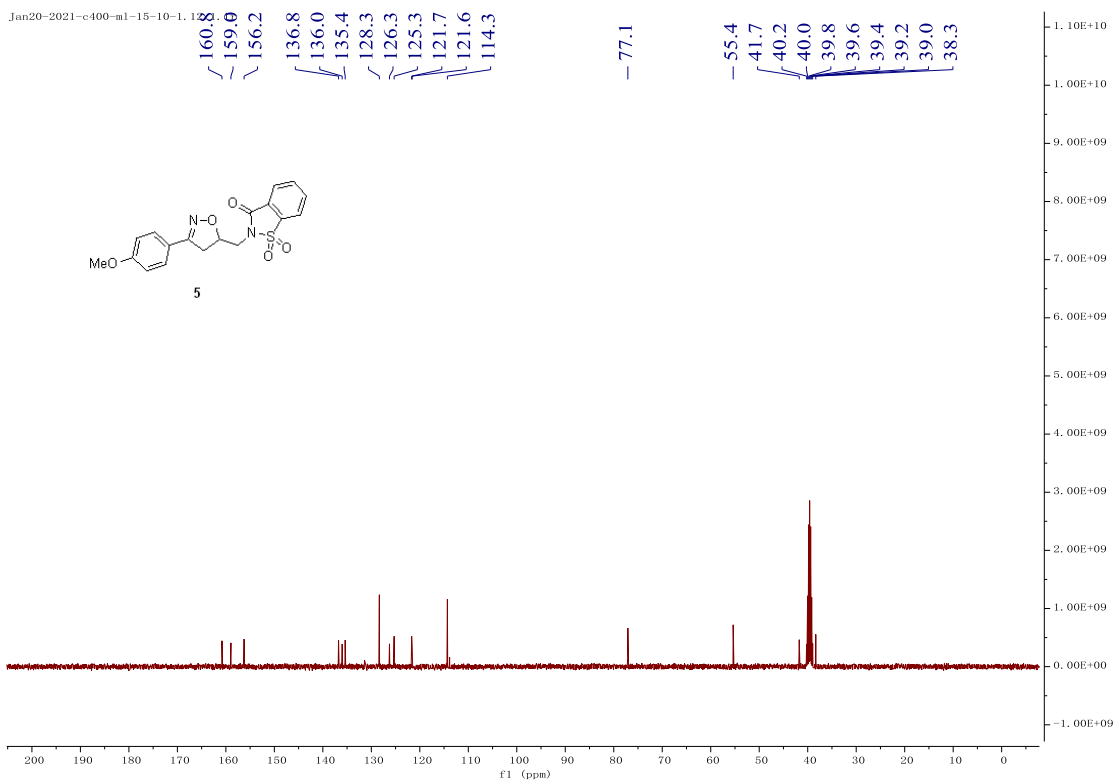

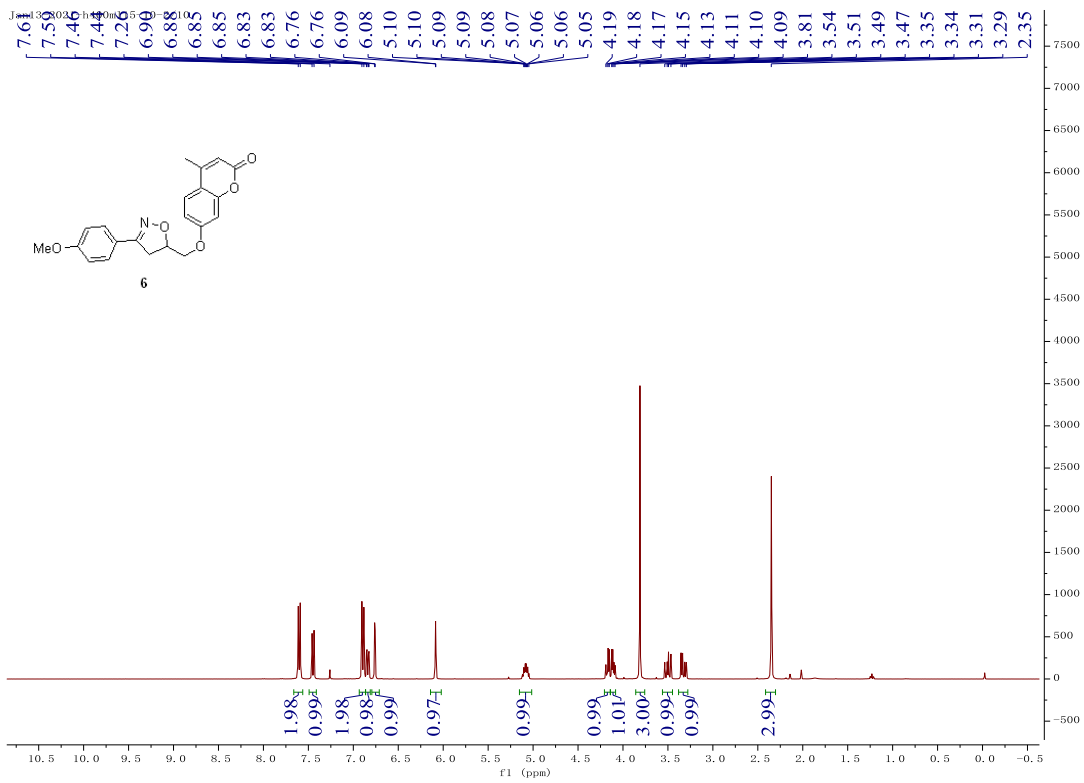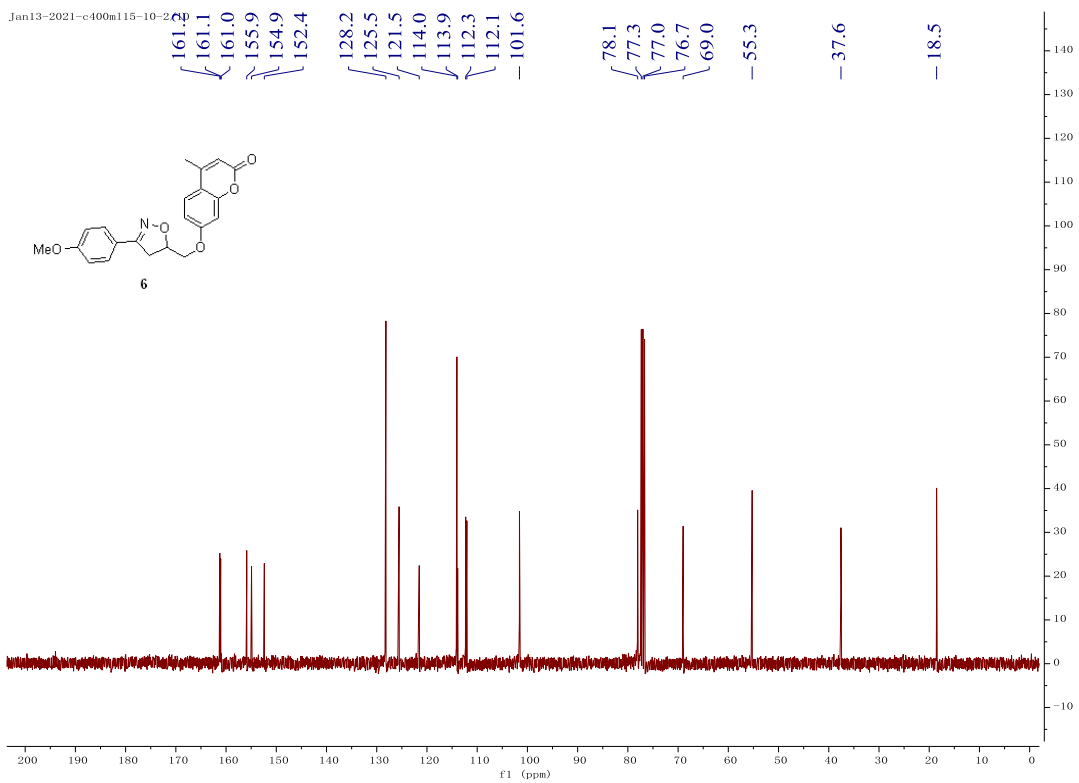

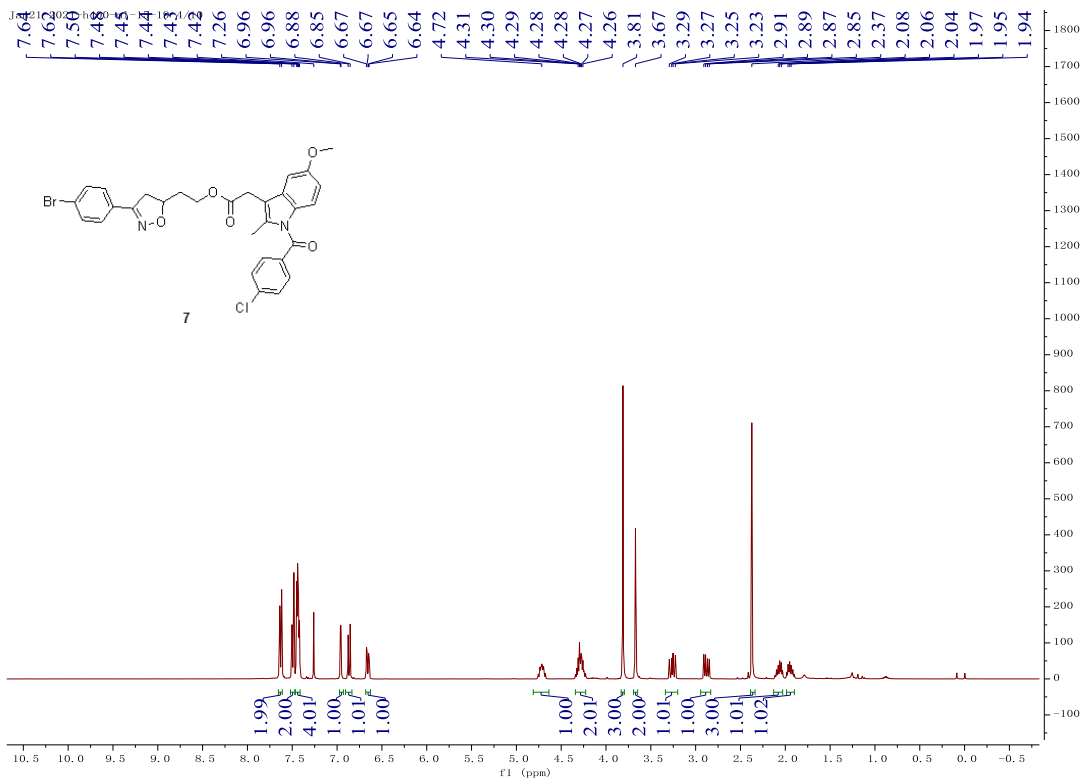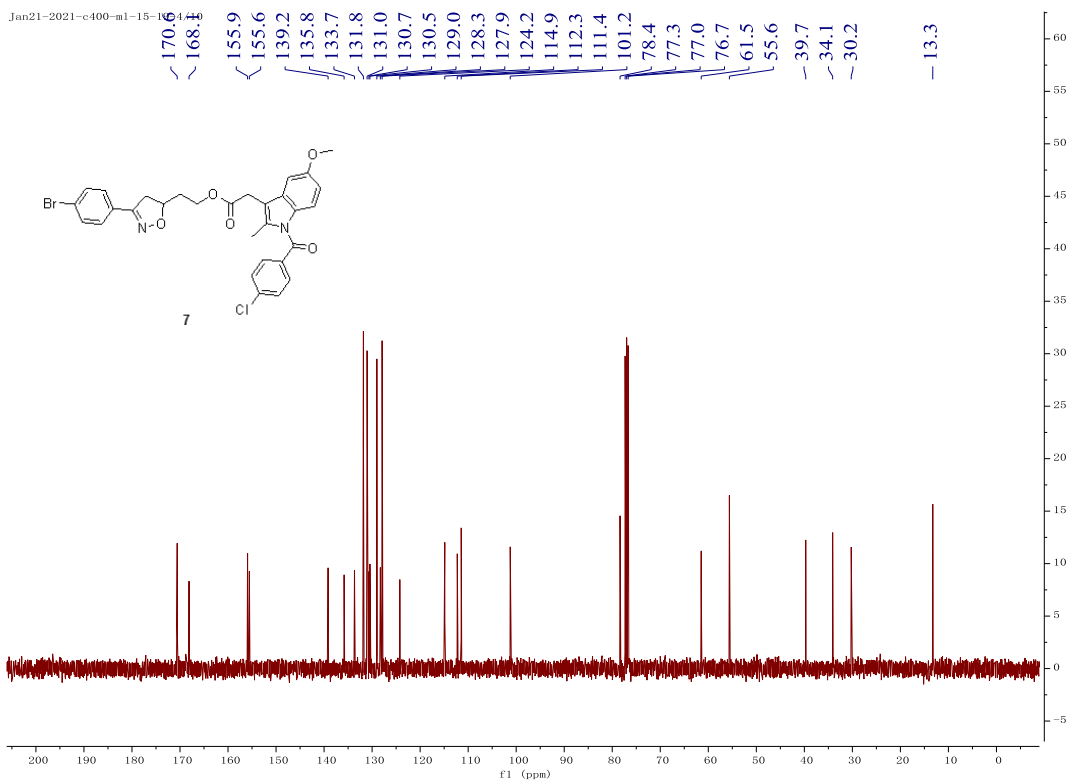

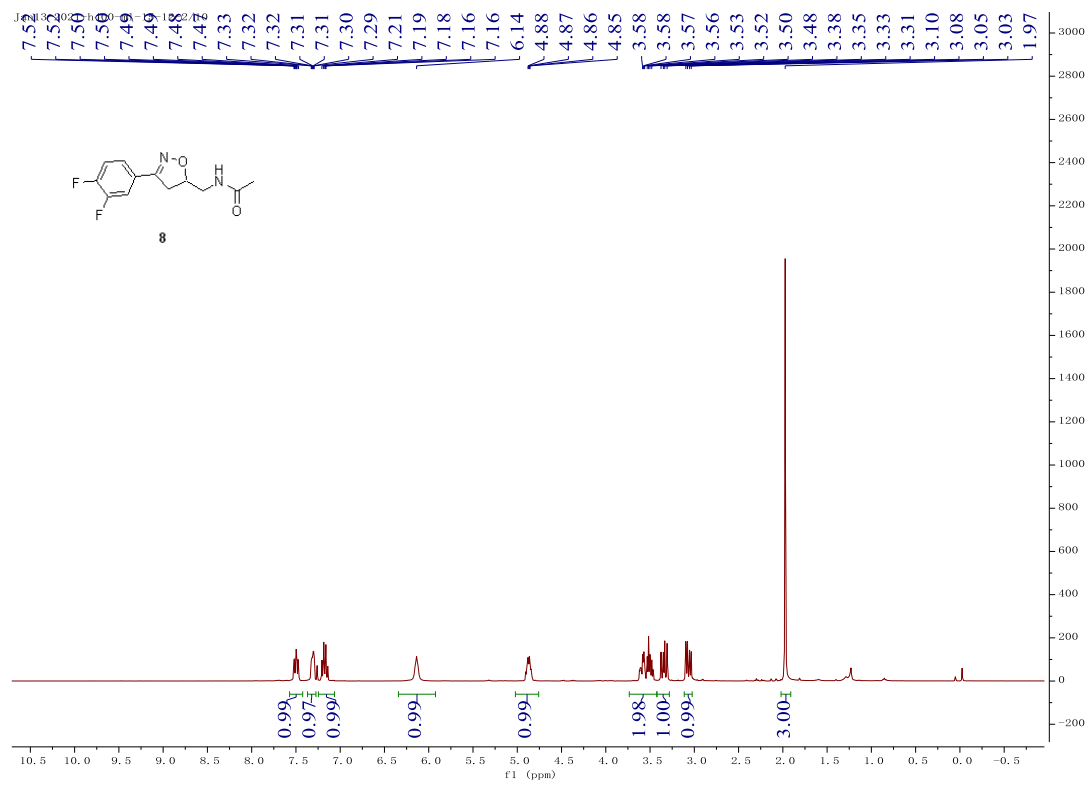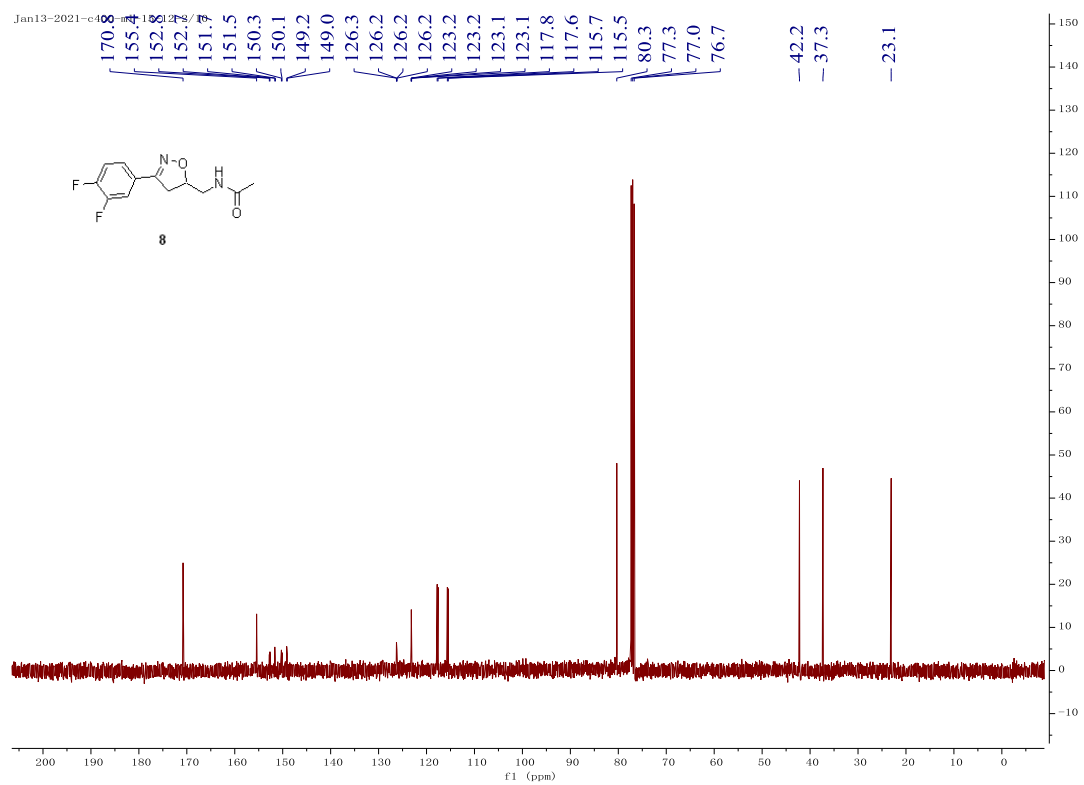

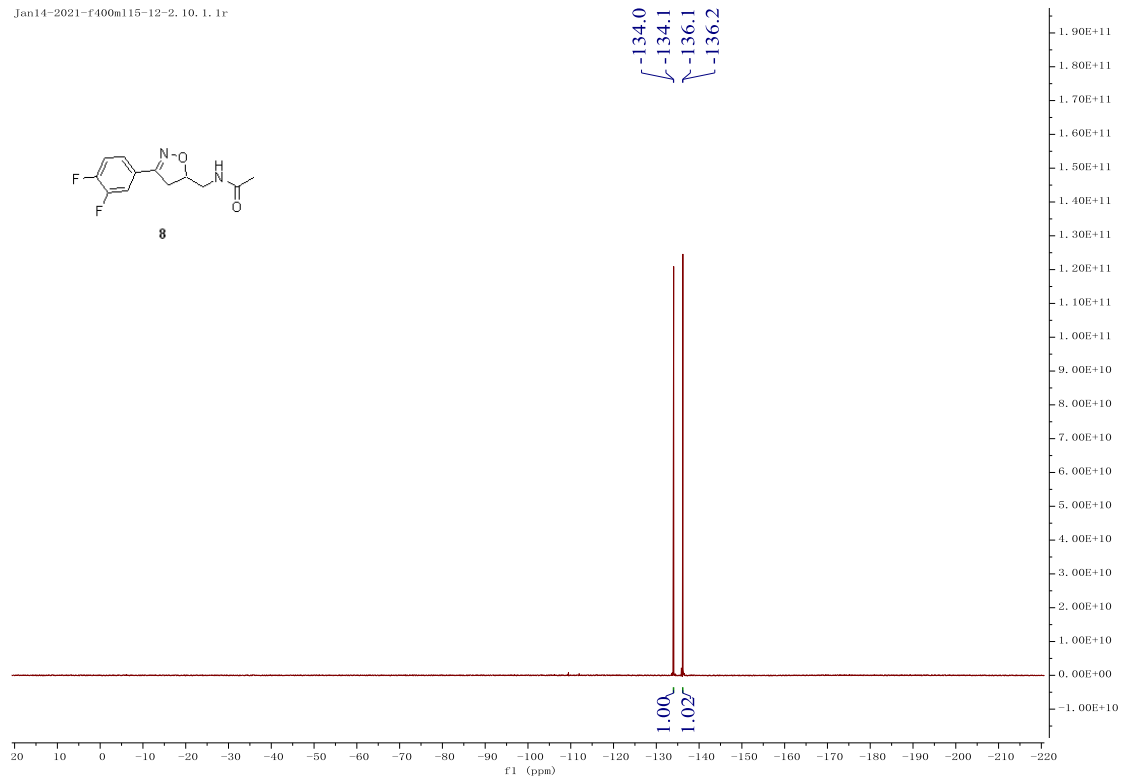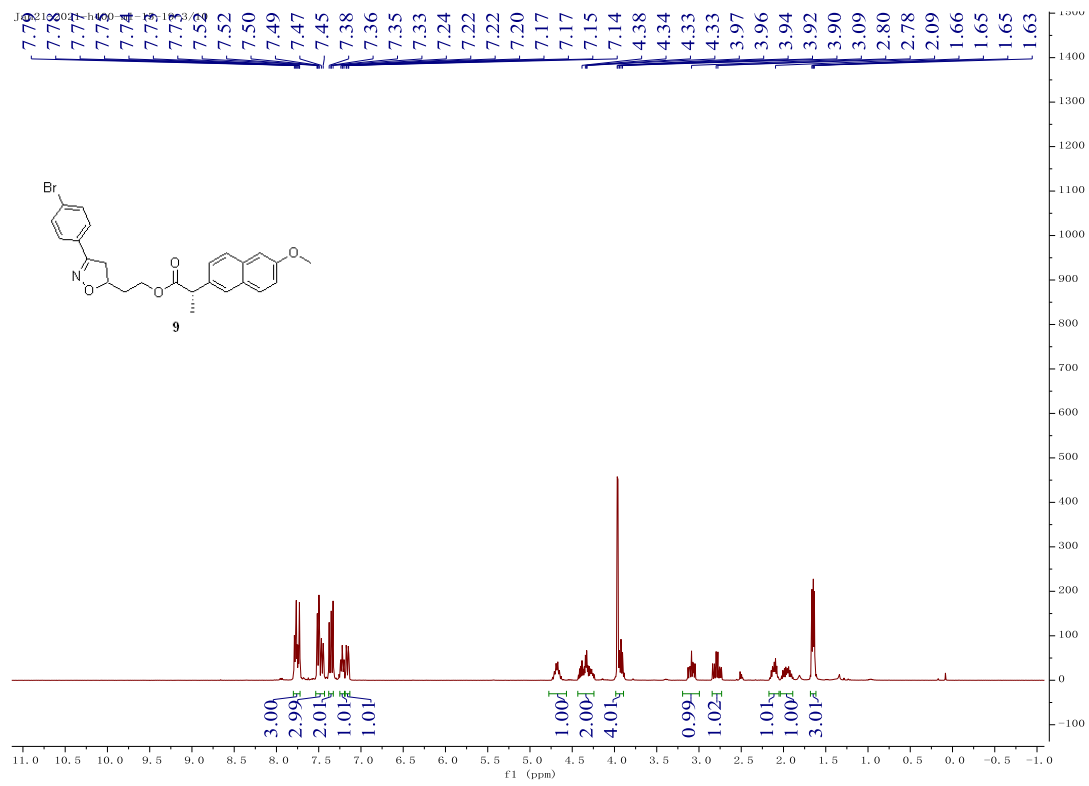

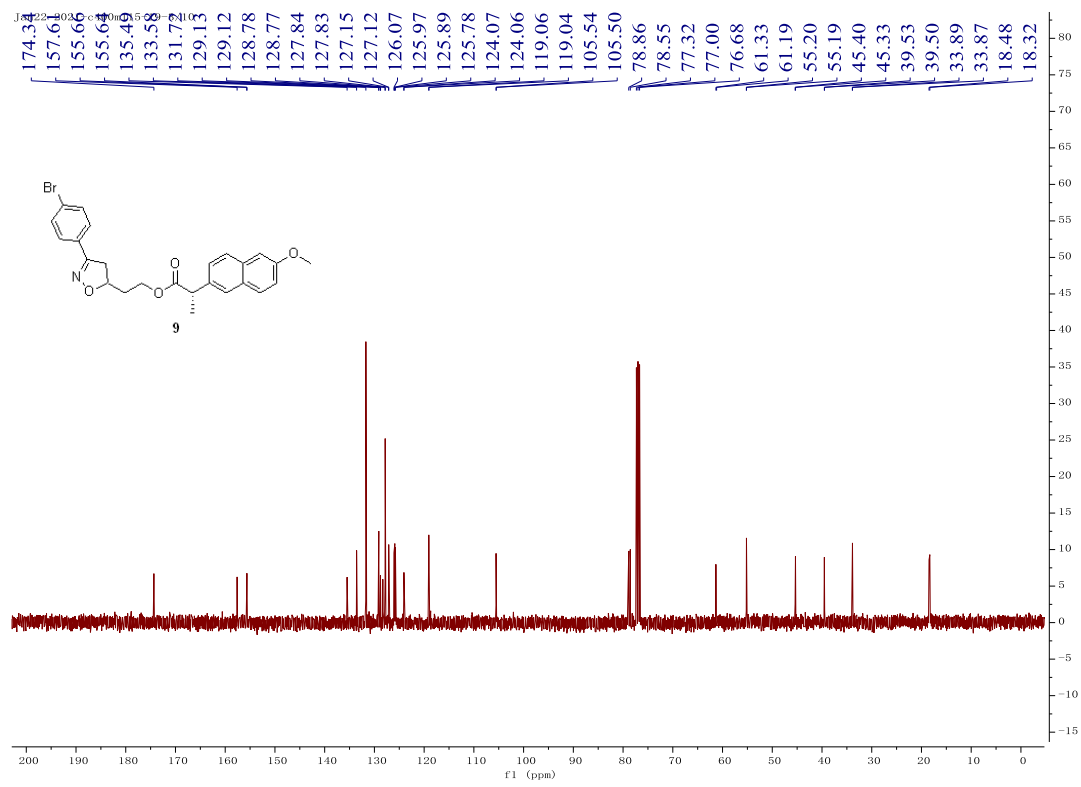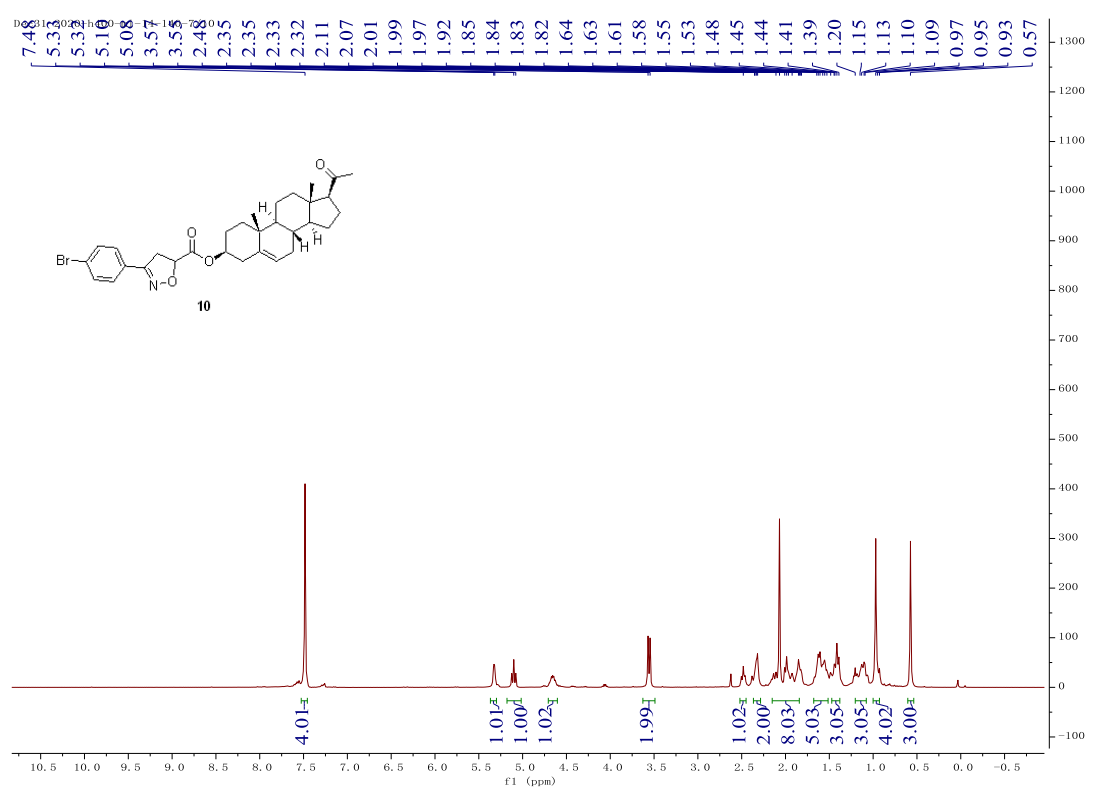



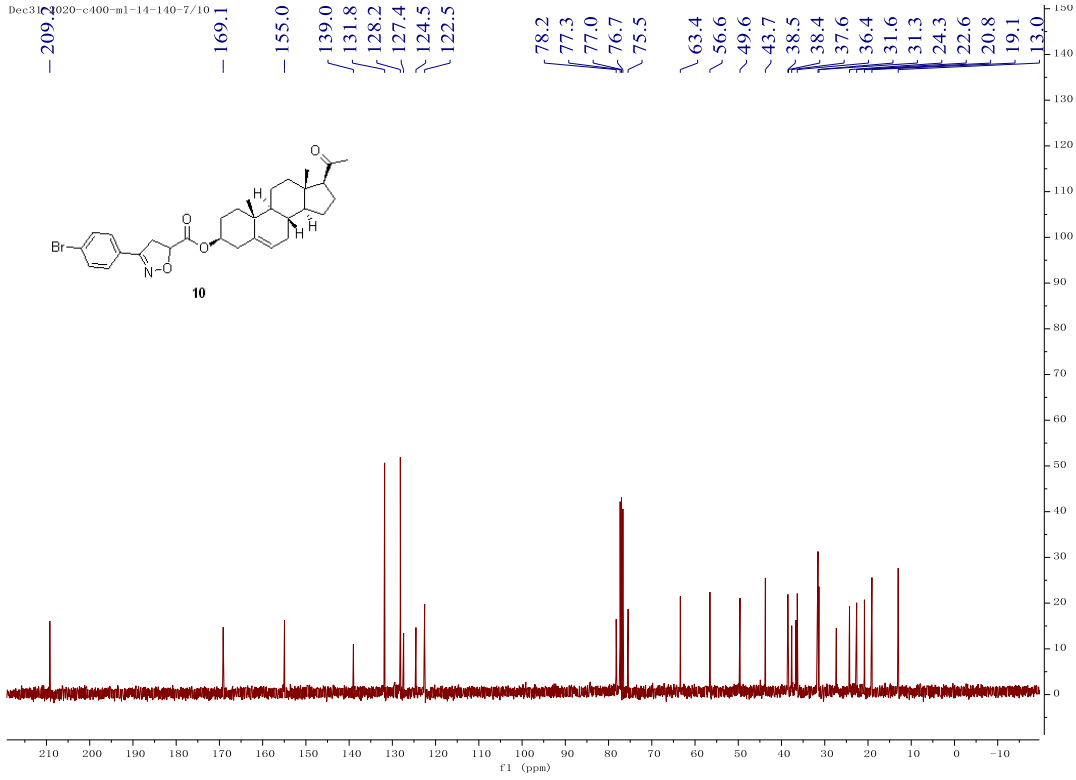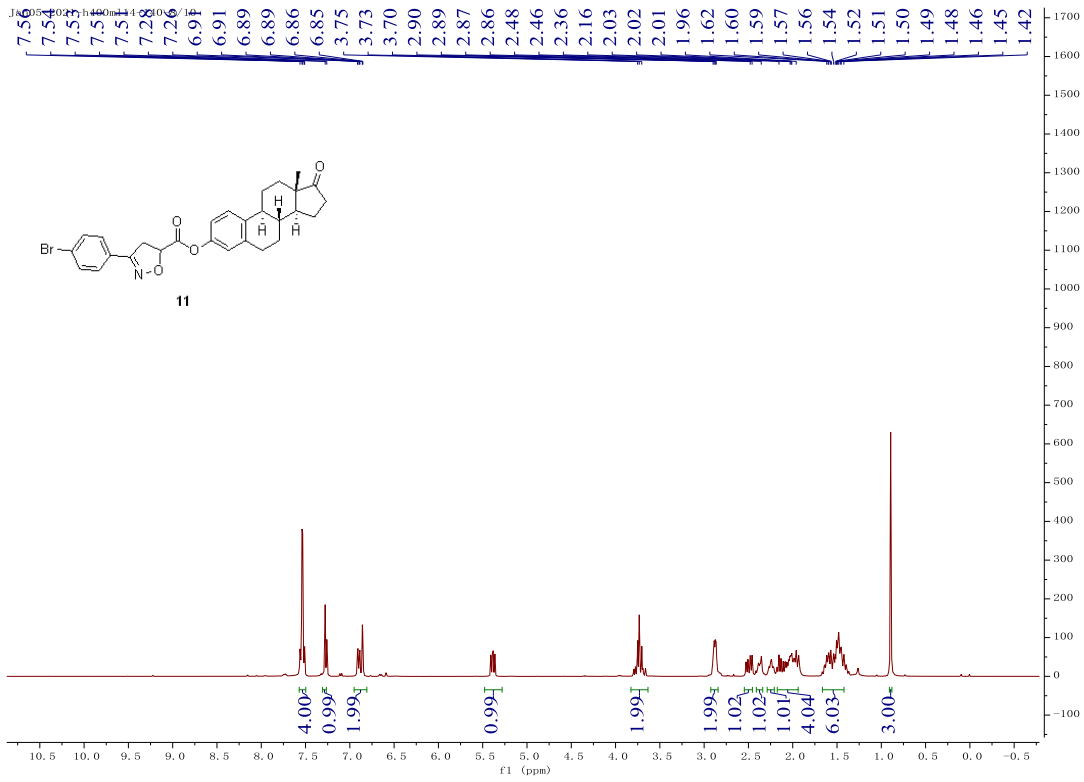

Jan07-2021 160100m114-140-8. 10. 1. 1r

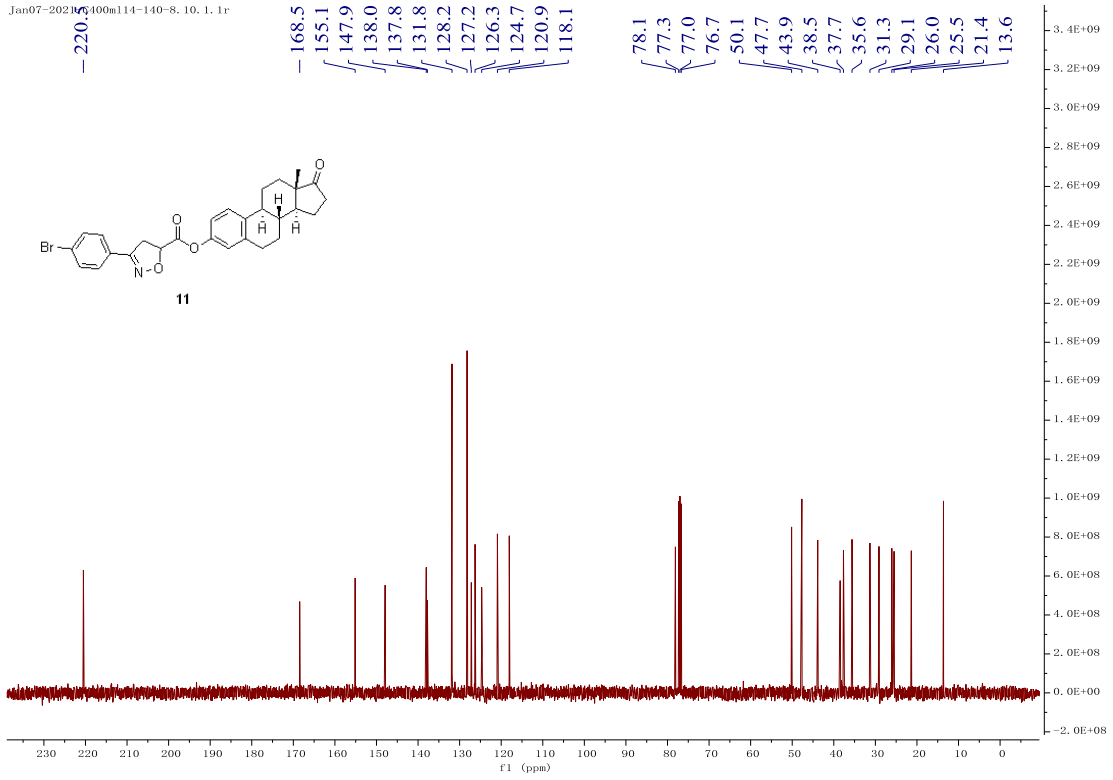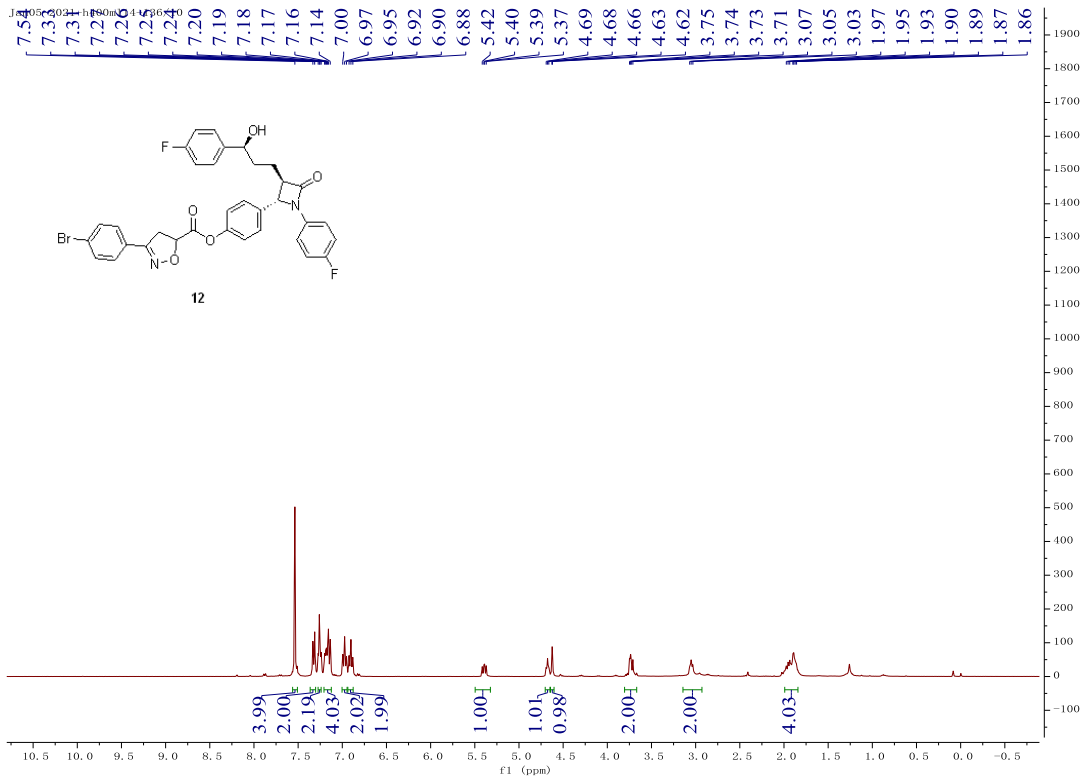

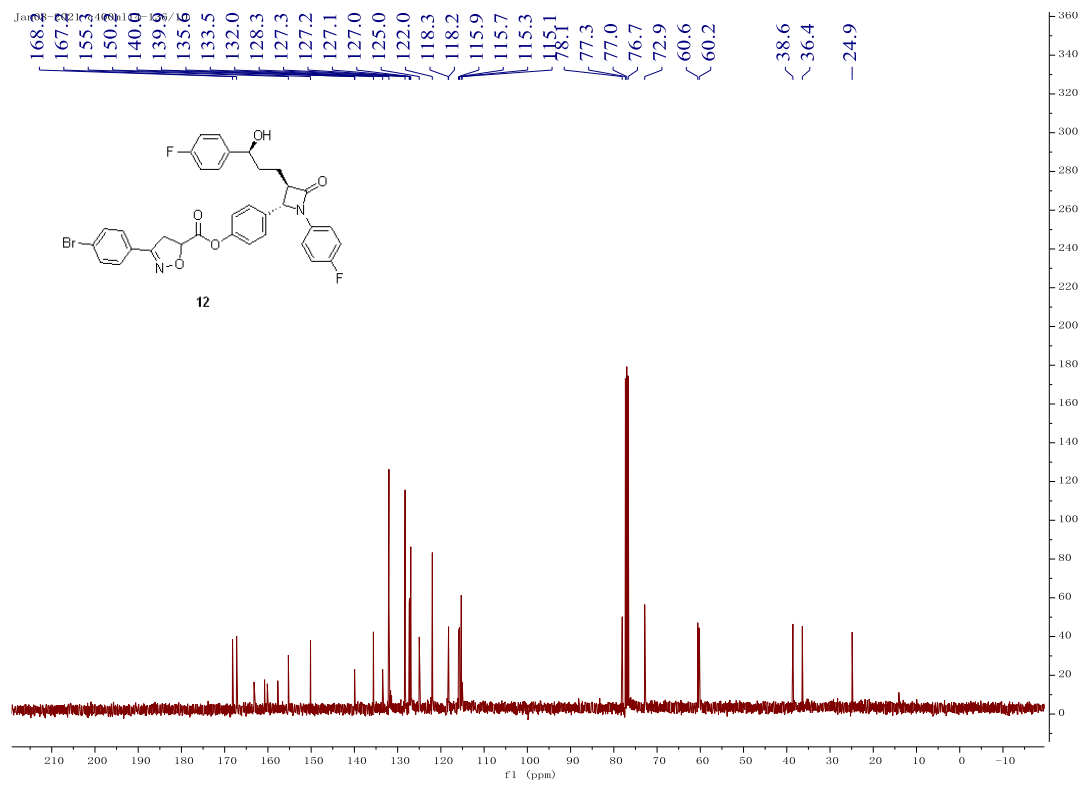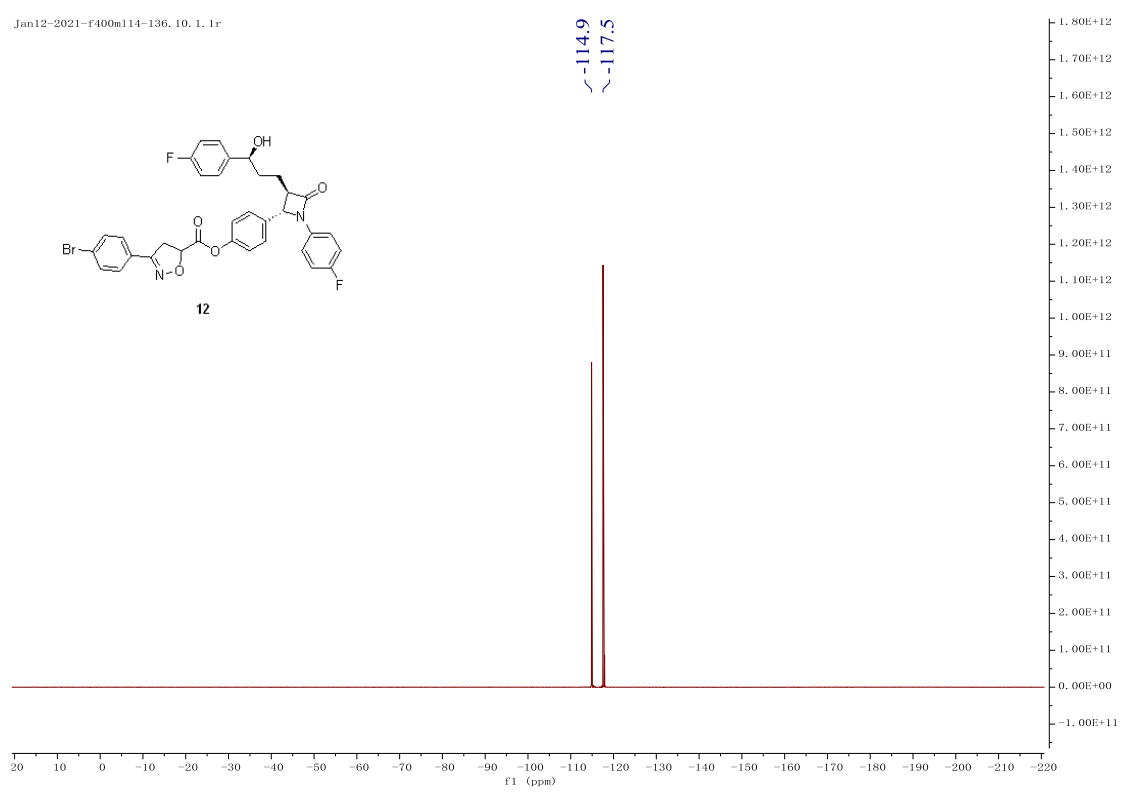

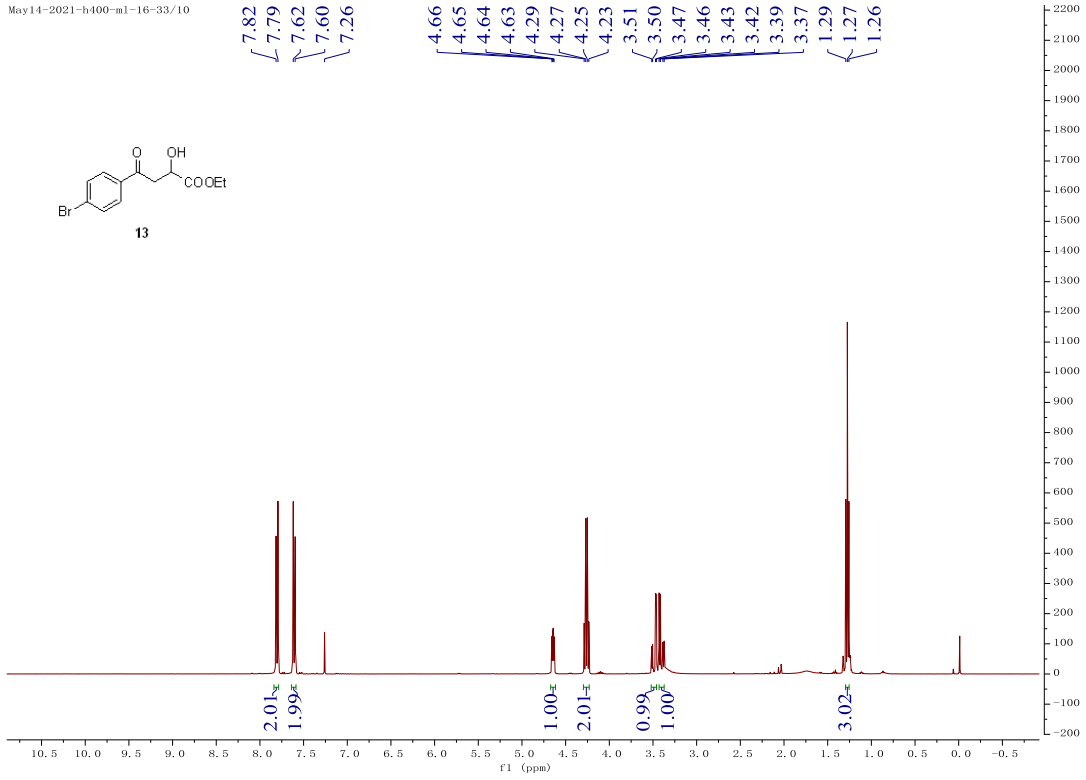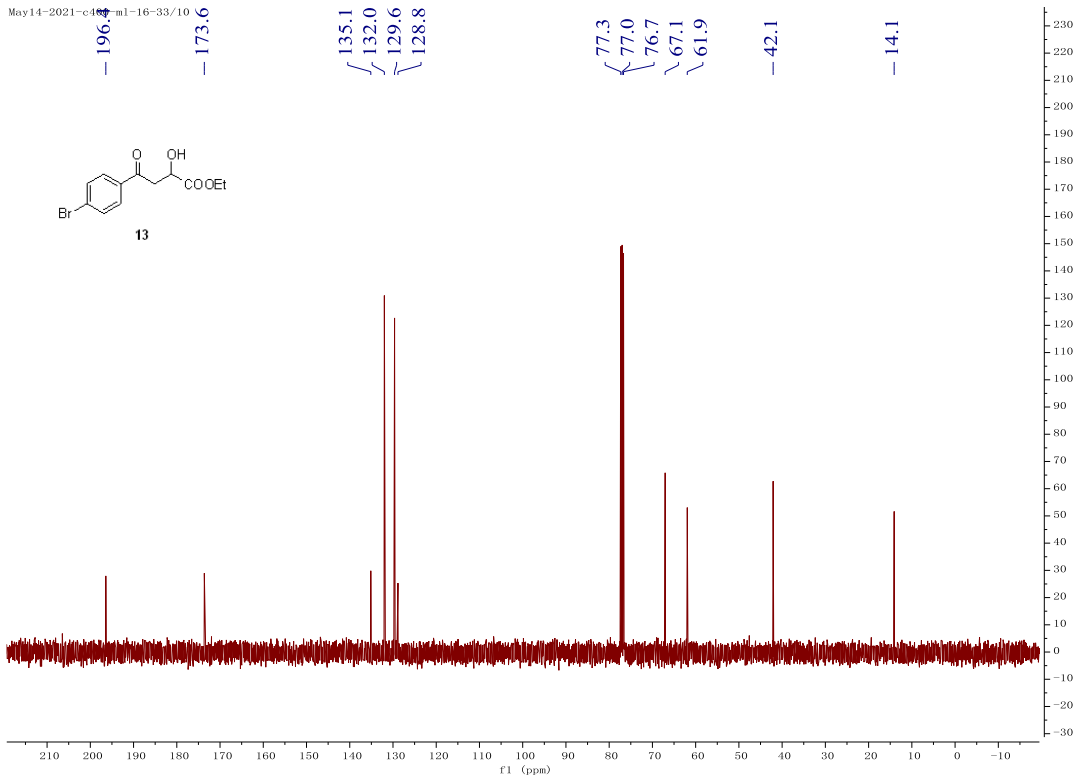

May17-2021-h400ML16-34/10

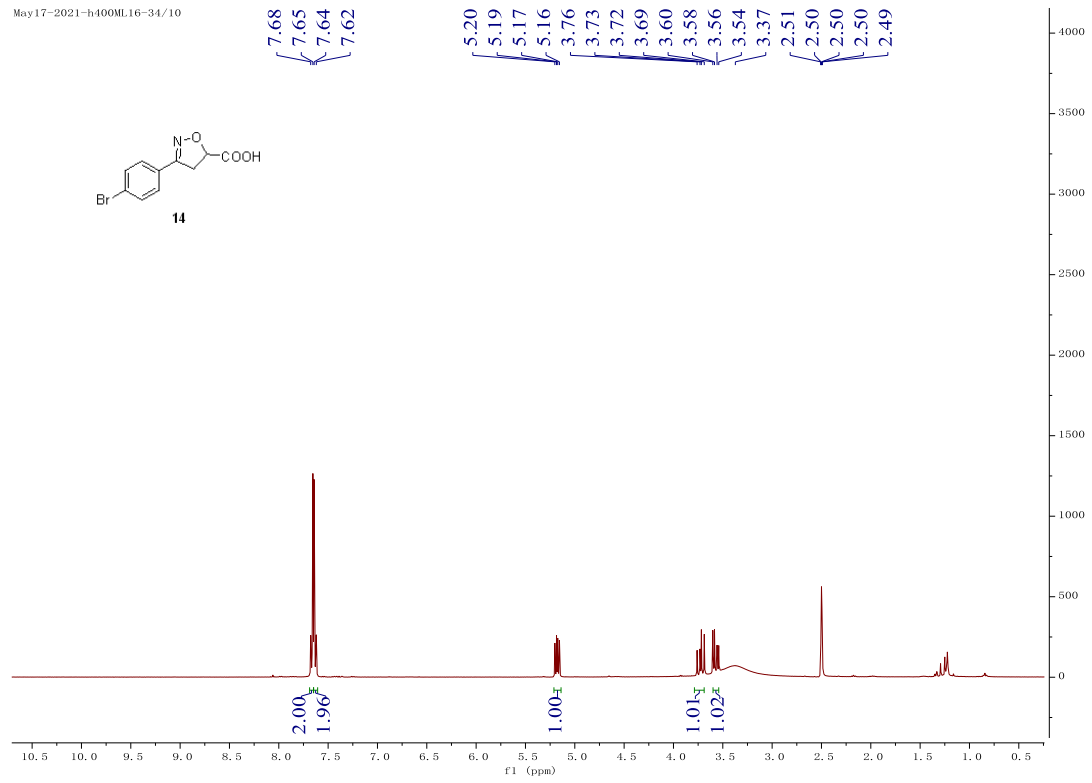

May14-2021-c400-ml-16-34/16

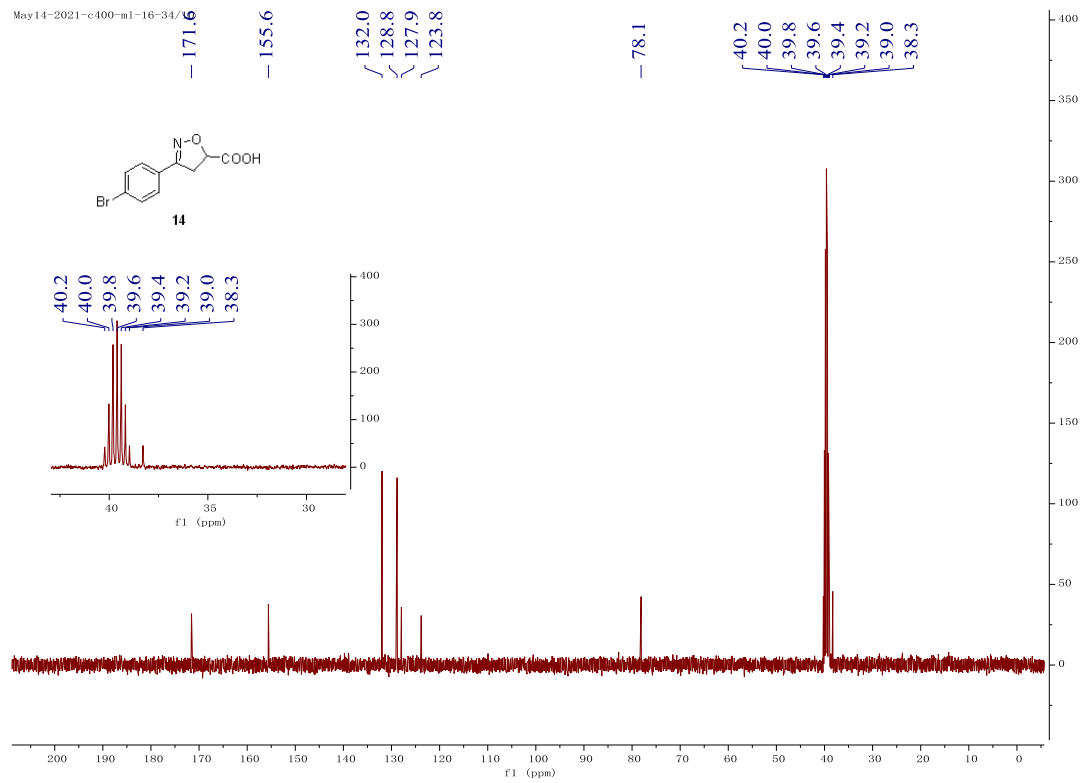

## Computational methods

The BP86 density functional method (DFT)<sup>[1]</sup> was employed to carry out all the calculations. The LANL2DZ<sup>[2]</sup> and 6-31G(d) basis sets<sup>[3]</sup> were used for Cu and the other atoms, respectively, in geometry optimizations. Vibrational frequency analyses at the same level of the theory were performed on all the optimized geometries to characterize them as local minima (no imaginary frequency) or transition states (one imaginary frequency). In addition, intrinsic reaction coordinate (IRC) calculations were used to verify that the transition state connect with appropriate reactant and product.<sup>[4]</sup> The Gibbs energies for all species were obtained at 298.15 K and 1 atm at their respective optimized structures. To consider solvation effects, the SMD solvation model<sup>[5]</sup> (solvent = tetrahydrofuran) was employed in single-point energy calculations at larger basis sets, SDD<sup>[6]</sup> for Cu and 6-311++G(d,p) for other atoms. The solution-phase Gibbs energy was determined by adding the solvation single-point energy and the gas-phase thermal correction to the Gibbs energy obtained from the vibrational frequencies. The translational entropy in solution was corrected using the method proposed by Whitesides *et al.*<sup>[7]</sup> Unless otherwise specified, the solution-phase Gibbs energy was used in the present discussions. All calculations were carried out with the Gaussian 09 suite of programs.<sup>[8]</sup>

## References

- [1] (a) Becke, A. D. *Phys. Rev. A* **1988**, *38*, 3098. (b) Perdew, J. P. *Phys. Rev. B* **1986**, *33*, 8822.
- [2] Wadt, W. R.; Hay, P. J. *J. Chem. Phys.* **1985**, *82*, 284.
- [3] Hariharan, P. C.; Pople, J. A. *Theor. Chim. Acta* **1973**, *28*, 213.
- [4] Fukui, K. *Acc. Chem. Res.* **1981**, *14*, 363.
- [5] Marenich, A.V.; Cramer, C. J.; Truhlar, D. G. *J Phys. Chem. B.* **2009**, *113*, 6378.
- [6] Andrae, D.; Haeussermann, U.; Dolg, M.; Stoll, H.; Preuss, H. *Theor. Chim. Acta.* **1990**, *77*, 123.
- [7] Mammen, M.; Shakhnovich, E. I.; Deutch, J. M.; Whitesides, G. M. *J. Org. Chem.* **1998**, *63*, 3821.
- [8] Frisch, M. J.; Trucks, G. W.; Schlegel, H. B.; Scuseria, G. E.; Robb, M. A.; Cheeseman, J. R.;

Scalmani, G.; Barone, V.; Mennucci, B.; Petersson, G. A.; Nakatsuji, H.; Caricato, M.; Li, X.; Hratchian, H. P.; Izmaylov, A. F.; Bloino, J.; Zheng, G.; Sonnenberg, J. L.; Hada, M.; Ehara, M.; Toyota, K.; Fukuda, R.; Hasegawa, J.; Ishida, M.; Nakajima, T.; Honda, Y.; Kitao, O.; Nakai, H.; Vreven, T.; Montgomery, J. A.; Peralta, J. E.; Ogliaro, F.; Bearpark, M.; Heyd, J. J.; Brothers, E.; Kudin, K. N.; Staroverov, V. N.; Kobayashi, R.; Normand, J.; Raghavachari, K.; Rendell, A.; Burant, J. C.; Iyengar, S. S.; Tomasi, J.; Cossi, M.; Rega, N.; Millam, N. J.; Klene, M.; Knox, J. E.; Cross, J. B.; Bakken, V.; Adamo, C.; Jaramillo, J.; Gomperts, R.; Stratmann, R. E.; Yazyev, O.; Austin, A. J.; Cammi, R.; Pomelli, C.; Ochterski, J. W.; Martin, R. L.; Morokuma, K.; Zakrzewski, V. G.; Voth, G. A.; Salvador, P.; Dannenberg, J. J.; Dapprich, S.; Daniels, A. D.; Farkas, O.; Foresman, J. B.; Ortiz, J. V.; Cioslowski, J.; Fox, D. J.; *Gaussian 09, Revision C.01*, Gaussian, Inc., Wallingford CT, **2010**.

## Cartesian Coordinates and Energies

INT1

| Center<br>Number | Atomic<br>Number | Atomic<br>Type | Coordinates (Angstroms) |           |           |
|------------------|------------------|----------------|-------------------------|-----------|-----------|
|                  |                  |                | X                       | Y         | Z         |
| 1                | 6                | 0              | -2.268066               | -0.873651 | 0.000251  |
| 2                | 6                | 0              | -0.937609               | -1.308915 | 0.000064  |
| 3                | 6                | 0              | 0.127318                | -0.374316 | -0.000204 |
| 4                | 6                | 0              | -0.185455               | 1.007637  | -0.000278 |
| 5                | 6                | 0              | -1.518936               | 1.432200  | -0.000119 |
| 6                | 6                | 0              | -2.569500               | 0.498308  | 0.000150  |
| 7                | 1                | 0              | -3.075750               | -1.614506 | 0.000460  |
| 8                | 1                | 0              | -0.711749               | -2.381954 | 0.000129  |
| 9                | 1                | 0              | 0.621097                | 1.750031  | -0.000460 |
| 10               | 1                | 0              | -1.739093               | 2.505857  | -0.000182 |
| 11               | 1                | 0              | -3.611055               | 0.836766  | 0.000287  |
| 12               | 6                | 0              | 1.497210                | -0.878180 | -0.000357 |
| 13               | 1                | 0              | 1.725340                | -1.946688 | -0.000926 |
| 14               | 7                | 0              | 2.539673                | -0.086658 | 0.000062  |
| 15               | 7                | 0              | 3.449104                | 0.634087  | 0.000459  |

Zero-point correction= 0.111389 (Hartree/Particle)  
Thermal correction to Energy= 0.118953  
Thermal correction to Enthalpy= 0.119898  
Thermal correction to Gibbs Free Energy= 0.079028  
Sum of electronic and zero-point Energies= -379.694884  
Sum of electronic and thermal Energies= -379.687319  
Sum of electronic and thermal Enthalpies= -379.686375  
Sum of electronic and thermal Free Energies= -379.727244  
BP86/6-311++G(d,p)/SMD(THF)//BP86/6-31G(d) energy = -379.91348634

TBN

| Center<br>Number | Atomic<br>Number | Atomic<br>Type | Coordinates (Angstroms) |           |           |
|------------------|------------------|----------------|-------------------------|-----------|-----------|
|                  |                  |                | X                       | Y         | Z         |
| 1                | 6                | 0              | 0.768197                | 0.010437  | 0.000041  |
| 2                | 6                | 0              | 0.911224                | 0.853130  | -1.274068 |
| 3                | 1                | 0              | 1.931300                | 1.272868  | -1.329533 |
| 4                | 1                | 0              | 0.744059                | 0.233688  | -2.173020 |
| 5                | 1                | 0              | 0.193589                | 1.691287  | -1.284266 |
| 6                | 6                | 0              | 1.732651                | -1.180413 | -0.002590 |
| 7                | 1                | 0              | 2.773578                | -0.812278 | -0.001943 |
| 8                | 1                | 0              | 1.587220                | -1.809227 | 0.893171  |
| 9                | 1                | 0              | 1.587000                | -1.805560 | -0.900877 |
| 10               | 6                | 0              | 0.911949                | 0.848181  | 1.277284  |
| 11               | 1                | 0              | 0.193672                | 1.685726  | 1.291347  |
| 12               | 1                | 0              | 0.746082                | 0.225146  | 2.173989  |
| 13               | 1                | 0              | 1.931753                | 1.268484  | 1.333412  |
| 14               | 8                | 0              | -0.572338               | -0.654439 | -0.000771 |
| 15               | 7                | 0              | -1.634959               | 0.304174  | 0.000332  |
| 16               | 8                | 0              | -2.701120               | -0.253981 | -0.000305 |

Zero-point correction= 0.128308 (Hartree/Particle)  
Thermal correction to Energy= 0.137021  
Thermal correction to Enthalpy= 0.137965  
Thermal correction to Gibbs Free Energy= 0.095841



Sum of electronic and zero-point Energies= -362.844215  
 Sum of electronic and thermal Energies= -362.835502  
 Sum of electronic and thermal Enthalpies= -362.834558  
 Sum of electronic and thermal Free Energies= -362.876682  
 BP86/6-311++G(d,p)/SMD(THF)//BP86/6-31G(d) energy = -363.08480634

### TS1

| Center<br>Number | Atomic<br>Number | Atomic<br>Type | Coordinates (Angstroms) |           |           |
|------------------|------------------|----------------|-------------------------|-----------|-----------|
|                  |                  |                | X                       | Y         | Z         |
| 1                | 6                | 0              | -0.425869               | 0.571053  | -0.830956 |
| 2                | 1                | 0              | 0.166118                | -0.003396 | -1.551386 |
| 3                | 7                | 0              | -0.395350               | 1.925531  | -1.118581 |
| 4                | 7                | 0              | -0.038559               | 2.942623  | -0.668476 |
| 5                | 6                | 0              | 2.797543                | -0.724233 | 0.087904  |
| 6                | 6                | 0              | 3.125755                | -0.892793 | 1.585968  |
| 7                | 1                | 0              | 3.722700                | -1.806329 | 1.762368  |
| 8                | 1                | 0              | 3.700869                | -0.022310 | 1.945780  |
| 9                | 1                | 0              | 2.200616                | -0.964666 | 2.183576  |
| 10               | 6                | 0              | 4.094012                | -0.615706 | -0.737780 |
| 11               | 1                | 0              | 4.691890                | -1.540178 | -0.641724 |
| 12               | 1                | 0              | 3.861618                | -0.457541 | -1.805522 |
| 13               | 1                | 0              | 4.702789                | 0.235161  | -0.387379 |
| 14               | 6                | 0              | 1.940224                | -1.904692 | -0.418434 |
| 15               | 1                | 0              | 0.981086                | -1.960400 | 0.125131  |
| 16               | 1                | 0              | 1.734734                | -1.802327 | -1.500685 |
| 17               | 1                | 0              | 2.469194                | -2.863630 | -0.268926 |
| 18               | 8                | 0              | 2.152583                | 0.550061  | -0.140252 |
| 19               | 7                | 0              | 0.771555                | 0.647100  | 0.666998  |
| 20               | 8                | 0              | 0.694383                | 1.769426  | 1.142337  |
| 21               | 6                | 0              | -1.735524               | 0.012121  | -0.424809 |
| 22               | 6                | 0              | -2.063194               | -1.311772 | -0.789919 |
| 23               | 6                | 0              | -2.620535               | 0.745218  | 0.397384  |
| 24               | 6                | 0              | -3.255772               | -1.893742 | -0.338731 |
| 25               | 1                | 0              | -1.378052               | -1.882816 | -1.426882 |
| 26               | 6                | 0              | -3.814161               | 0.161340  | 0.836813  |
| 27               | 1                | 0              | -2.366185               | 1.767820  | 0.695639  |
| 28               | 6                | 0              | -4.135461               | -1.157913 | 0.471184  |
| 29               | 1                | 0              | -3.501090               | -2.921683 | -0.627006 |
| 30               | 1                | 0              | -4.496614               | 0.736822  | 1.471587  |
| 31               | 1                | 0              | -5.071037               | -1.610476 | 0.817421  |

Zero-point correction= 0.241527 (Hartree/Particle)  
 Thermal correction to Energy= 0.258063  
 Thermal correction to Enthalpy= 0.259007  
 Thermal correction to Gibbs Free Energy= 0.196594  
 Sum of electronic and zero-point Energies= -742.511007  
 Sum of electronic and thermal Energies= -742.494471  
 Sum of electronic and thermal Enthalpies= -742.493527  
 Sum of electronic and thermal Free Energies= -742.555940  
 BP86/6-311++G(d,p)/SMD(THF)//BP86/6-31G(d) energy = -742.97424823

### N<sub>2</sub>

| Center<br>Number | Atomic<br>Number | Atomic<br>Type | Coordinates (Angstroms) |          |           |
|------------------|------------------|----------------|-------------------------|----------|-----------|
|                  |                  |                | X                       | Y        | Z         |
| 1                | 7                | 0              | 0.000000                | 0.000000 | 0.558483  |
| 2                | 7                | 0              | 0.000000                | 0.000000 | -0.558483 |

```

-----
Zero-point correction=                0.005364 (Hartree/Particle)
Thermal correction to Energy=         0.007724
Thermal correction to Enthalpy=       0.008668
Thermal correction to Gibbs Free Energy= -0.013106
Sum of electronic and zero-point Energies= -109.515585
Sum of electronic and thermal Energies= -109.513224
Sum of electronic and thermal Enthalpies= -109.512280
Sum of electronic and thermal Free Energies= -109.534054
BP86/6-311++G(d,p)/SMD(THF)//BP86/6-31G(d)    energy = -109.55603207

```

## INT2

```

-----
Center      Atomic      Atomic      Coordinates (Angstroms)
Number      Number      Type        X             Y             Z
-----
   1         6         0         -4.135071    1.098889    0.064145
   2         6         0         -2.769539    1.369755   -0.062007
   3         6         0         -1.815883    0.317098   -0.101652
   4         6         0         -2.282367   -1.020620   -0.006628
   5         6         0         -3.652908   -1.279606    0.117038
   6         6         0         -4.585668   -0.229565    0.154360
   7         1         0         -4.851742    1.927456    0.091468
   8         1         0         -2.422974    2.407890   -0.134664
   9         1         0         -1.560314   -1.839130   -0.032682
  10         1         0         -3.996349   -2.318081    0.187154
  11         1         0         -5.655575   -0.443478    0.253897
  12         6         0         -0.423085    0.700579   -0.235667
  13         1         0         -0.142551    1.751121   -0.306809
  14         6         0         3.048948    0.090938    0.101195
  15         6         0         4.014342    1.270896   -0.110631
  16         1         0         4.999777    1.025532    0.322827
  17         1         0         4.150168    1.474681   -1.186665
  18         1         0         3.633218    2.185566    0.374452
  19         6         0         3.589249   -1.174017   -0.589722
  20         1         0         4.579564   -1.433216   -0.172643
  21         1         0         2.909065   -2.025993   -0.450869
  22         1         0         3.707838   -0.991474   -1.671784
  23         6         0         2.768211   -0.125102    1.595881
  24         1         0         2.361599    0.793948    2.053040
  25         1         0         2.055230   -0.950251    1.752729
  26         1         0         3.708382   -0.380757    2.115794
  27         8         0         1.844356    0.594634   -0.597657
  28         7         0         0.602025   -0.139511   -0.308500
  29         8         0         0.627284   -1.384973   -0.226545

```

```

-----
Zero-point correction=                0.236062 (Hartree/Particle)
Thermal correction to Energy=         0.250442
Thermal correction to Enthalpy=       0.251386
Thermal correction to Gibbs Free Energy= 0.194477
Sum of electronic and zero-point Energies= -633.071250
Sum of electronic and thermal Energies= -633.056871
Sum of electronic and thermal Enthalpies= -633.055927
Sum of electronic and thermal Free Energies= -633.112836
BP86/6-311++G(d,p)/SMD(THF)//BP86/6-31G(d)    energy = -633.49685259

```

## H<sub>2</sub>O

```

-----
Center      Atomic      Atomic      Coordinates (Angstroms)
Number      Number      Type        X             Y             Z
-----

```

|   |   |   |          |           |           |
|---|---|---|----------|-----------|-----------|
| 1 | 8 | 0 | 0.000000 | 0.000000  | 0.121734  |
| 2 | 1 | 0 | 0.000000 | 0.764987  | -0.486935 |
| 3 | 1 | 0 | 0.000000 | -0.764987 | -0.486935 |

Zero-point correction= 0.020584 (Hartree/Particle)  
 Thermal correction to Energy= 0.023418  
 Thermal correction to Enthalpy= 0.024363  
 Thermal correction to Gibbs Free Energy= 0.002888  
 Sum of electronic and zero-point Energies= -76.388614  
 Sum of electronic and thermal Energies= -76.385779  
 Sum of electronic and thermal Enthalpies= -76.384835  
 Sum of electronic and thermal Free Energies= -76.406309  
 BP86/6-311++G(d,p)/SMD(THF)//BP86/6-31G(d) energy = -76.46567358

### TS2a

| Center<br>Number | Atomic<br>Number | Atomic<br>Type | Coordinates (Angstroms) |           |           |
|------------------|------------------|----------------|-------------------------|-----------|-----------|
|                  |                  |                | X                       | Y         | Z         |
| 1                | 6                | 0              | -4.190167               | 1.195245  | 0.139087  |
| 2                | 6                | 0              | -2.800580               | 1.260512  | -0.026283 |
| 3                | 6                | 0              | -2.040317               | 0.071102  | -0.090968 |
| 4                | 6                | 0              | -2.687949               | -1.180627 | 0.011809  |
| 5                | 6                | 0              | -4.077312               | -1.234820 | 0.177354  |
| 6                | 6                | 0              | -4.831723               | -0.050083 | 0.242032  |
| 7                | 1                | 0              | -4.773829               | 2.121240  | 0.185612  |
| 8                | 1                | 0              | -2.290895               | 2.225990  | -0.115401 |
| 9                | 1                | 0              | -2.102396               | -2.105054 | -0.039617 |
| 10               | 1                | 0              | -4.574636               | -2.207920 | 0.255843  |
| 11               | 1                | 0              | -5.918509               | -0.098867 | 0.371110  |
| 12               | 6                | 0              | -0.582865               | 0.197683  | -0.266496 |
| 13               | 1                | 0              | -0.036698               | 1.303823  | -0.316283 |
| 14               | 6                | 0              | 3.152338                | -0.091187 | 0.169344  |
| 15               | 6                | 0              | 4.259158                | 0.959157  | -0.090562 |
| 16               | 1                | 0              | 5.136598                | 0.761722  | 0.552210  |
| 17               | 1                | 0              | 4.579463                | 0.920731  | -1.145469 |
| 18               | 1                | 0              | 3.891780                | 1.978897  | 0.120833  |
| 19               | 6                | 0              | 3.678486                | -1.504141 | -0.142433 |
| 20               | 1                | 0              | 4.544291                | -1.748232 | 0.499325  |
| 21               | 1                | 0              | 2.897126                | -2.262843 | 0.024119  |
| 22               | 1                | 0              | 3.996743                | -1.562679 | -1.197440 |
| 23               | 6                | 0              | 2.654184                | 0.004594  | 1.626591  |
| 24               | 1                | 0              | 2.236921                | 1.005933  | 1.837087  |
| 25               | 1                | 0              | 1.869578                | -0.746816 | 1.822405  |
| 26               | 1                | 0              | 3.481107                | -0.172507 | 2.337333  |
| 27               | 8                | 0              | 2.090009                | 0.200888  | -0.765321 |
| 28               | 7                | 0              | 0.201014                | -0.781071 | -0.378454 |
| 29               | 8                | 0              | 0.448210                | -1.966547 | -0.434308 |
| 30               | 8                | 0              | 0.925449                | 2.318142  | -0.419499 |
| 31               | 1                | 0              | 1.052087                | 2.607835  | 0.511092  |
| 32               | 1                | 0              | 1.695314                | 1.261769  | -0.597416 |

Zero-point correction= 0.252444 (Hartree/Particle)  
 Thermal correction to Energy= 0.269216  
 Thermal correction to Enthalpy= 0.270161  
 Thermal correction to Gibbs Free Energy= 0.207573  
 Sum of electronic and zero-point Energies= -709.430833  
 Sum of electronic and thermal Energies= -709.414061  
 Sum of electronic and thermal Enthalpies= -709.413116

Sum of electronic and thermal Free Energies= -709.475704  
 BP86/6-311++G(d,p)/SMD(THF)//BP86/6-31G(d) energy = -709.92148583

**2a**

| Center<br>Number | Atomic<br>Number | Atomic<br>Type | Coordinates (Angstroms) |           |           |
|------------------|------------------|----------------|-------------------------|-----------|-----------|
|                  |                  |                | X                       | Y         | Z         |
| 1                | 6                | 0              | -2.213722               | -1.392917 | 0.000142  |
| 2                | 1                | 0              | -3.222581               | -1.819656 | 0.000056  |
| 3                | 1                | 0              | -1.371485               | -2.091765 | 0.000650  |
| 4                | 6                | 0              | -2.019498               | -0.061369 | -0.000265 |
| 5                | 1                | 0              | -2.858470               | 0.643068  | -0.000703 |
| 6                | 6                | 0              | -0.690623               | 0.608582  | -0.000058 |
| 7                | 8                | 0              | -0.547041               | 1.827921  | -0.000083 |
| 8                | 8                | 0              | 0.349142                | -0.278163 | 0.000180  |
| 9                | 6                | 0              | 1.670454                | 0.331749  | 0.000464  |
| 10               | 1                | 0              | 1.762053                | 0.980433  | -0.888978 |
| 11               | 1                | 0              | 1.762231                | 0.979217  | 0.890776  |
| 12               | 6                | 0              | 2.692572                | -0.795052 | -0.000397 |
| 13               | 1                | 0              | 2.581617                | -1.430350 | -0.895722 |
| 14               | 1                | 0              | 3.712958                | -0.373293 | -0.000174 |
| 15               | 1                | 0              | 2.581769                | -1.431672 | 0.894009  |

Zero-point correction= 0.120355 (Hartree/Particle)  
 Thermal correction to Energy= 0.128508  
 Thermal correction to Enthalpy= 0.129452  
 Thermal correction to Gibbs Free Energy= 0.086801  
 Sum of electronic and zero-point Energies= -345.659255  
 Sum of electronic and thermal Energies= -345.651102  
 Sum of electronic and thermal Enthalpies= -345.650158  
 Sum of electronic and thermal Free Energies= -345.692809  
 BP86/6-311++G(d,p)/SMD(THF)//BP86/6-31G(d) energy = -345.89413613

**TS2b**

| Center<br>Number | Atomic<br>Number | Atomic<br>Type | Coordinates (Angstroms) |           |           |
|------------------|------------------|----------------|-------------------------|-----------|-----------|
|                  |                  |                | X                       | Y         | Z         |
| 1                | 6                | 0              | -4.270743               | -0.771768 | 1.169824  |
| 2                | 6                | 0              | -2.922938               | -0.483100 | 0.915947  |
| 3                | 6                | 0              | -2.521041               | -0.044147 | -0.367083 |
| 4                | 6                | 0              | -3.501300               | 0.085310  | -1.379383 |
| 5                | 6                | 0              | -4.844307               | -0.218567 | -1.122326 |
| 6                | 6                | 0              | -5.235496               | -0.647645 | 0.156231  |
| 7                | 1                | 0              | -4.568364               | -1.102785 | 2.171209  |
| 8                | 1                | 0              | -2.173152               | -0.581651 | 1.704818  |
| 9                | 1                | 0              | -3.202847               | 0.431144  | -2.376887 |
| 10               | 1                | 0              | -5.587217               | -0.111748 | -1.920639 |
| 11               | 1                | 0              | -6.285654               | -0.882925 | 0.361552  |
| 12               | 6                | 0              | -1.123248               | 0.285451  | -0.735298 |
| 13               | 6                | 0              | 1.263616                | 2.604493  | 0.206825  |
| 14               | 6                | 0              | 2.479872                | 3.043121  | -0.623170 |
| 15               | 1                | 0              | 2.829855                | 4.033317  | -0.283014 |
| 16               | 1                | 0              | 3.307032                | 2.322245  | -0.508084 |
| 17               | 1                | 0              | 2.220515                | 3.111356  | -1.693621 |
| 18               | 6                | 0              | 1.632337                | 2.465267  | 1.693361  |
| 19               | 1                | 0              | 1.981181                | 3.438944  | 2.082608  |
| 20               | 1                | 0              | 0.770052                | 2.139531  | 2.296335  |
| 21               | 1                | 0              | 2.438069                | 1.724155  | 1.824487  |

|    |   |   |           |           |           |
|----|---|---|-----------|-----------|-----------|
| 22 | 6 | 0 | 0.077856  | 3.560822  | 0.002533  |
| 23 | 1 | 0 | -0.177013 | 3.645686  | -1.068656 |
| 24 | 1 | 0 | -0.814619 | 3.211311  | 0.549597  |
| 25 | 1 | 0 | 0.331367  | 4.568302  | 0.377587  |
| 26 | 8 | 0 | 0.961916  | 1.287468  | -0.391296 |
| 27 | 7 | 0 | -0.211799 | 0.656561  | 0.216000  |
| 28 | 8 | 0 | -0.014815 | -0.051018 | 1.241914  |
| 29 | 6 | 0 | -0.267243 | -1.609004 | -1.139734 |
| 30 | 1 | 0 | -1.216389 | -1.992545 | -1.528367 |
| 31 | 6 | 0 | 0.190797  | -2.075382 | 0.092867  |
| 32 | 1 | 0 | -0.484738 | -2.592074 | 0.779940  |
| 33 | 6 | 0 | 1.612760  | -2.177875 | 0.489028  |
| 34 | 8 | 0 | 2.004814  | -2.718053 | 1.520751  |
| 35 | 8 | 0 | 2.461241  | -1.648417 | -0.452182 |
| 36 | 6 | 0 | 3.866844  | -1.725893 | -0.107302 |
| 37 | 1 | 0 | 4.044224  | -1.135882 | 0.810688  |
| 38 | 1 | 0 | 4.124051  | -2.774824 | 0.125296  |
| 39 | 6 | 0 | 4.658041  | -1.189224 | -1.291847 |
| 40 | 1 | 0 | 4.378136  | -0.144973 | -1.513164 |
| 41 | 1 | 0 | 5.739095  | -1.219975 | -1.068205 |
| 42 | 1 | 0 | 4.474698  | -1.794358 | -2.196413 |
| 43 | 1 | 0 | -0.998051 | 0.847730  | -1.666147 |
| 44 | 1 | 0 | 0.472269  | -1.306908 | -1.889248 |

-----

Zero-point correction= 0.357967 (Hartree/Particle)  
Thermal correction to Energy= 0.380804  
Thermal correction to Enthalpy= 0.381748  
Thermal correction to Gibbs Free Energy= 0.304061  
Sum of electronic and zero-point Energies= -978.707408  
Sum of electronic and thermal Energies= -978.684572  
Sum of electronic and thermal Enthalpies= -978.683627  
Sum of electronic and thermal Free Energies= -978.761314  
BP86/6-311++G(d,p)/SMD(THF)//BP86/6-31G(d) energy = -979.36530871

### INT3

-----

| Center<br>Number | Atomic<br>Number | Atomic<br>Type | Coordinates (Angstroms) |           |           |
|------------------|------------------|----------------|-------------------------|-----------|-----------|
|                  |                  |                | X                       | Y         | Z         |
| 1                | 6                | 0              | -4.254683               | -0.732443 | 1.302711  |
| 2                | 6                | 0              | -2.950061               | -0.331767 | 0.972522  |
| 3                | 6                | 0              | -2.512753               | -0.366746 | -0.366323 |
| 4                | 6                | 0              | -3.409254               | -0.807645 | -1.361605 |
| 5                | 6                | 0              | -4.709557               | -1.215017 | -1.030069 |
| 6                | 6                | 0              | -5.137283               | -1.178416 | 0.306867  |
| 7                | 1                | 0              | -4.581565               | -0.694162 | 2.348271  |
| 8                | 1                | 0              | -2.264101               | 0.014730  | 1.750626  |
| 9                | 1                | 0              | -3.085036               | -0.828026 | -2.410148 |
| 10               | 1                | 0              | -5.391822               | -1.552377 | -1.818727 |
| 11               | 1                | 0              | -6.154396               | -1.490889 | 0.569060  |
| 12               | 6                | 0              | -1.104162               | 0.025633  | -0.793668 |
| 13               | 6                | 0              | 1.031171                | 2.854913  | -0.137161 |
| 14               | 6                | 0              | -0.100772               | 3.839066  | -0.470732 |
| 15               | 1                | 0              | 0.171225                | 4.863669  | -0.159249 |
| 16               | 1                | 0              | -0.303751               | 3.849692  | -1.556610 |
| 17               | 1                | 0              | -1.024229               | 3.548827  | 0.057590  |
| 18               | 6                | 0              | 2.285609                | 3.125902  | -0.981115 |
| 19               | 1                | 0              | 2.670828                | 4.138754  | -0.770325 |
| 20               | 1                | 0              | 3.073668                | 2.391800  | -0.742523 |
| 21               | 1                | 0              | 2.054405                | 3.059315  | -2.058836 |

|    |   |   |           |           |           |
|----|---|---|-----------|-----------|-----------|
| 22 | 6 | 0 | 1.367136  | 2.854110  | 1.362267  |
| 23 | 1 | 0 | 0.463210  | 2.684364  | 1.970075  |
| 24 | 1 | 0 | 2.091095  | 2.055375  | 1.589766  |
| 25 | 1 | 0 | 1.797456  | 3.831498  | 1.647681  |
| 26 | 8 | 0 | 0.649896  | 1.504261  | -0.591080 |
| 27 | 7 | 0 | -0.480120 | 0.996766  | 0.155728  |
| 28 | 8 | 0 | 0.049627  | 0.123779  | 1.196898  |
| 29 | 6 | 0 | -0.099025 | -1.158653 | -0.828027 |
| 30 | 1 | 0 | -0.581990 | -2.119432 | -1.061372 |
| 31 | 6 | 0 | 0.479954  | -1.127726 | 0.608650  |
| 32 | 1 | 0 | 0.047714  | -1.933797 | 1.230248  |
| 33 | 6 | 0 | 2.008416  | -1.268874 | 0.648735  |
| 34 | 8 | 0 | 2.813344  | -0.432085 | 1.020924  |
| 35 | 8 | 0 | 2.332970  | -2.525848 | 0.216856  |
| 36 | 6 | 0 | 3.758791  | -2.843186 | 0.198100  |
| 37 | 1 | 0 | 4.238663  | -2.345309 | 1.056810  |
| 38 | 1 | 0 | 3.792939  | -3.936010 | 0.336602  |
| 39 | 6 | 0 | 4.400872  | -2.419426 | -1.118688 |
| 40 | 1 | 0 | 4.371099  | -1.323013 | -1.229398 |
| 41 | 1 | 0 | 5.458184  | -2.739336 | -1.140274 |
| 42 | 1 | 0 | 3.883066  | -2.880472 | -1.977193 |
| 43 | 1 | 0 | -1.145772 | 0.531635  | -1.771157 |
| 44 | 1 | 0 | 0.686880  | -0.963380 | -1.574578 |

-----

Zero-point correction= 0.362120 (Hartree/Particle)  
Thermal correction to Energy= 0.384050  
Thermal correction to Enthalpy= 0.384995  
Thermal correction to Gibbs Free Energy= 0.309240  
Sum of electronic and zero-point Energies= -978.751446  
Sum of electronic and thermal Energies= -978.729515  
Sum of electronic and thermal Enthalpies= -978.728571  
Sum of electronic and thermal Free Energies= -978.804326  
BP86/6-311++G(d,p)/SMD(THF)//BP86/6-31G(d) energy = -979.40578388

#### INT4

-----

| Center<br>Number | Atomic<br>Number | Atomic<br>Type | Coordinates (Angstroms) |           |           |
|------------------|------------------|----------------|-------------------------|-----------|-----------|
|                  |                  |                | X                       | Y         | Z         |
| 1                | 6                | 0              | 2.019175                | 1.247957  | -0.000003 |
| 2                | 6                | 0              | 0.620554                | 1.203238  | 0.000001  |
| 3                | 6                | 0              | -0.048922               | -0.048277 | 0.000001  |
| 4                | 6                | 0              | 0.714199                | -1.243804 | -0.000002 |
| 5                | 6                | 0              | 2.112413                | -1.182170 | 0.000000  |
| 6                | 6                | 0              | 2.769738                | 0.059729  | 0.000000  |
| 7                | 1                | 0              | 2.526799                | 2.218758  | -0.000002 |
| 8                | 1                | 0              | 0.032436                | 2.126248  | 0.000002  |
| 9                | 1                | 0              | 0.197653                | -2.208646 | -0.000003 |
| 10               | 1                | 0              | 2.692797                | -2.111248 | 0.000001  |
| 11               | 1                | 0              | 3.864238                | 0.101841  | 0.000001  |
| 12               | 6                | 0              | -1.474728               | -0.103625 | 0.000004  |
| 13               | 7                | 0              | -2.655552               | -0.010775 | 0.000005  |
| 14               | 8                | 0              | -3.874955               | 0.043772  | -0.000005 |

-----

Zero-point correction= 0.100127 (Hartree/Particle)  
Thermal correction to Energy= 0.107749  
Thermal correction to Enthalpy= 0.108693  
Thermal correction to Gibbs Free Energy= 0.066435  
Sum of electronic and zero-point Energies= -399.550099  
Sum of electronic and thermal Energies= -399.542477

Sum of electronic and thermal Enthalpies= -399.541533  
 Sum of electronic and thermal Free Energies= -399.583791  
 BP86/6-311++G(d,p)/SMD(THF)//BP86/6-31G(d) energy = -399.76869019

**'BuOH...OH<sub>2</sub>**

| Center Number | Atomic Number | Atomic Type | Coordinates (Angstroms) |           |           |
|---------------|---------------|-------------|-------------------------|-----------|-----------|
|               |               |             | X                       | Y         | Z         |
| 1             | 6             | 0           | -0.717310               | 0.001088  | 0.000396  |
| 2             | 6             | 0           | -0.919893               | 1.425268  | 0.559033  |
| 3             | 1             | 0           | -1.779486               | 1.474524  | 1.252720  |
| 4             | 1             | 0           | -0.021842               | 1.758438  | 1.112603  |
| 5             | 1             | 0           | -1.096548               | 2.135142  | -0.267941 |
| 6             | 6             | 0           | -0.417985               | -0.992931 | 1.143068  |
| 7             | 1             | 0           | -1.250768               | -1.044812 | 1.868425  |
| 8             | 1             | 0           | -0.252000               | -2.005186 | 0.733030  |
| 9             | 1             | 0           | 0.490882                | -0.689152 | 1.695730  |
| 10            | 6             | 0           | -1.948676               | -0.447710 | -0.801202 |
| 11            | 1             | 0           | -2.135878               | 0.252053  | -1.634294 |
| 12            | 1             | 0           | -1.780884               | -1.451910 | -1.228481 |
| 13            | 1             | 0           | -2.848538               | -0.483303 | -0.162192 |
| 14            | 8             | 0           | 0.371597                | 0.000065  | -0.946447 |
| 15            | 1             | 0           | 3.456004                | 0.456596  | -0.741522 |
| 16            | 8             | 0           | 3.027726                | 0.035844  | 0.032533  |
| 17            | 1             | 0           | 2.863367                | -0.880844 | -0.273318 |
| 18            | 1             | 0           | 1.184290                | 0.276897  | -0.451222 |

Zero-point correction= 0.155669 (Hartree/Particle)  
 Thermal correction to Energy= 0.166192  
 Thermal correction to Enthalpy= 0.167136  
 Thermal correction to Gibbs Free Energy= 0.119716  
 Sum of electronic and zero-point Energies= -309.923981  
 Sum of electronic and thermal Energies= -309.913458  
 Sum of electronic and thermal Enthalpies= -309.912514  
 Sum of electronic and thermal Free Energies= -309.959934  
 BP86/6-311++G(d,p)/SMD(THF)//BP86/6-31G(d) energy = -310.21590971

**TS3a**

| Center Number | Atomic Number | Atomic Type | Coordinates (Angstroms) |           |           |
|---------------|---------------|-------------|-------------------------|-----------|-----------|
|               |               |             | X                       | Y         | Z         |
| 1             | 6             | 0           | 4.364488                | 0.323488  | -1.055889 |
| 2             | 6             | 0           | 3.088808                | -0.233102 | -1.186951 |
| 3             | 6             | 0           | 2.196186                | -0.235096 | -0.082268 |
| 4             | 6             | 0           | 2.617740                | 0.331694  | 1.143597  |
| 5             | 6             | 0           | 3.898600                | 0.886574  | 1.260542  |
| 6             | 6             | 0           | 4.776701                | 0.885530  | 0.165486  |
| 7             | 1             | 0           | 5.043175                | 0.318415  | -1.915989 |
| 8             | 1             | 0           | 2.765058                | -0.670958 | -2.136444 |
| 9             | 1             | 0           | 1.937185                | 0.335575  | 1.999903  |
| 10            | 1             | 0           | 4.210935                | 1.322256  | 2.215842  |
| 11            | 1             | 0           | 5.777533                | 1.319925  | 0.261161  |
| 12            | 6             | 0           | 0.878511                | -0.807719 | -0.208746 |
| 13            | 7             | 0           | 0.173225                | -1.372711 | -1.036225 |
| 14            | 8             | 0           | -0.908989               | -1.886313 | -1.294977 |
| 15            | 6             | 0           | -0.607825               | -0.773109 | 1.520706  |
| 16            | 1             | 0           | 0.076257                | -1.352351 | 2.150716  |
| 17            | 6             | 0           | -1.749764               | -1.360726 | 1.030746  |

|    |   |   |           |           |           |
|----|---|---|-----------|-----------|-----------|
| 18 | 1 | 0 | -1.941616 | -2.429530 | 1.158178  |
| 19 | 6 | 0 | -2.887096 | -0.614279 | 0.440615  |
| 20 | 8 | 0 | -3.994795 | -1.099907 | 0.231866  |
| 21 | 8 | 0 | -2.569611 | 0.693043  | 0.174960  |
| 22 | 6 | 0 | -3.656380 | 1.477140  | -0.387181 |
| 23 | 1 | 0 | -3.993978 | 0.997018  | -1.322999 |
| 24 | 1 | 0 | -4.508926 | 1.462229  | 0.315537  |
| 25 | 6 | 0 | -3.129077 | 2.885162  | -0.621906 |
| 26 | 1 | 0 | -2.278106 | 2.876988  | -1.324318 |
| 27 | 1 | 0 | -3.926363 | 3.516833  | -1.051568 |
| 28 | 1 | 0 | -2.794838 | 3.346623  | 0.323272  |
| 29 | 1 | 0 | -0.537085 | 0.318035  | 1.572996  |

-----

Zero-point correction= 0.221726 (Hartree/Particle)  
Thermal correction to Energy= 0.237842  
Thermal correction to Enthalpy= 0.238786  
Thermal correction to Gibbs Free Energy= 0.174854  
Sum of electronic and zero-point Energies= -745.197661  
Sum of electronic and thermal Energies= -745.181545  
Sum of electronic and thermal Enthalpies= -745.180601  
Sum of electronic and thermal Free Energies= -745.244534  
BP86/6-311++G(d,p)/SMD(THF)//BP86/6-31G(d) energy = -745.64800408

### TS3b

-----

| Center<br>Number | Atomic<br>Number | Atomic<br>Type | Coordinates (Angstroms) |           |           |
|------------------|------------------|----------------|-------------------------|-----------|-----------|
|                  |                  |                | X                       | Y         | Z         |
| 1                | 6                | 0              | 4.712971                | -0.482031 | -0.766285 |
| 2                | 6                | 0              | 3.330200                | -0.588430 | -0.972503 |
| 3                | 6                | 0              | 2.438986                | -0.516956 | 0.119026  |
| 4                | 6                | 0              | 2.951150                | -0.322429 | 1.416642  |
| 5                | 6                | 0              | 4.335984                | -0.223380 | 1.621667  |
| 6                | 6                | 0              | 5.218664                | -0.304072 | 0.532518  |
| 7                | 1                | 0              | 5.397183                | -0.535074 | -1.620813 |
| 8                | 1                | 0              | 2.933487                | -0.723157 | -1.985902 |
| 9                | 1                | 0              | 2.251780                | -0.231345 | 2.255555  |
| 10               | 1                | 0              | 4.725980                | -0.073101 | 2.634719  |
| 11               | 1                | 0              | 6.299572                | -0.222170 | 0.693550  |
| 12               | 6                | 0              | 0.942780                | -0.682937 | -0.090467 |
| 13               | 6                | 0              | -1.009663               | 2.661084  | -0.256198 |
| 14               | 6                | 0              | 0.339677                | 3.143034  | 0.317108  |
| 15               | 1                | 0              | 0.444567                | 4.238609  | 0.213325  |
| 16               | 1                | 0              | 0.422847                | 2.886420  | 1.388033  |
| 17               | 1                | 0              | 1.173882                | 2.661123  | -0.220720 |
| 18               | 6                | 0              | -2.182255               | 3.316003  | 0.515656  |
| 19               | 1                | 0              | -2.161223               | 4.415199  | 0.396541  |
| 20               | 1                | 0              | -3.148287               | 2.941572  | 0.133949  |
| 21               | 1                | 0              | -2.114919               | 3.081294  | 1.592723  |
| 22               | 6                | 0              | -1.119080               | 2.977901  | -1.758301 |
| 23               | 1                | 0              | -0.290574               | 2.504101  | -2.310232 |
| 24               | 1                | 0              | -2.070552               | 2.589722  | -2.162112 |
| 25               | 1                | 0              | -1.080946               | 4.068228  | -1.935279 |
| 26               | 8                | 0              | -1.157032               | 1.243185  | -0.085718 |
| 27               | 7                | 0              | 0.450483                | 0.177885  | -1.108477 |
| 28               | 8                | 0              | -0.342086               | -0.497193 | -1.952774 |
| 29               | 6                | 0              | 0.415731                | -2.113851 | -0.393249 |
| 30               | 1                | 0              | 1.211620                | -2.734764 | -0.840653 |
| 31               | 6                | 0              | -0.698786               | -1.848407 | -1.400497 |
| 32               | 1                | 0              | -0.706931               | -2.507255 | -2.281613 |



|    |   |   |           |           |           |
|----|---|---|-----------|-----------|-----------|
| 33 | 6 | 0 | -2.152129 | -1.734884 | -0.911326 |
| 34 | 8 | 0 | -3.096752 | -1.740130 | -1.684376 |
| 35 | 8 | 0 | -2.256985 | -1.615084 | 0.437972  |
| 36 | 6 | 0 | -3.623620 | -1.365759 | 0.908175  |
| 37 | 1 | 0 | -3.954578 | -0.409712 | 0.468577  |
| 38 | 1 | 0 | -4.273884 | -2.166769 | 0.517684  |
| 39 | 6 | 0 | -3.600598 | -1.325775 | 2.427585  |
| 40 | 1 | 0 | -2.986483 | -0.487342 | 2.799419  |
| 41 | 1 | 0 | -4.628151 | -1.180670 | 2.804525  |
| 42 | 1 | 0 | -3.213214 | -2.269481 | 2.848933  |
| 43 | 1 | 0 | 0.432952  | -0.294981 | 0.932721  |
| 44 | 1 | 0 | 0.046680  | -2.616644 | 0.513667  |
| 45 | 8 | 0 | -0.375488 | 0.335720  | 2.019726  |
| 46 | 1 | 0 | -0.980588 | -0.424655 | 2.163478  |
| 47 | 1 | 0 | -0.856929 | 0.899001  | 1.023305  |

-----

Zero-point correction= 0.378766 (Hartree/Particle)  
Thermal correction to Energy= 0.403051  
Thermal correction to Enthalpy= 0.403996  
Thermal correction to Gibbs Free Energy= 0.323057  
Sum of electronic and zero-point Energies= -1055.114724  
Sum of electronic and thermal Energies= -1055.090439  
Sum of electronic and thermal Enthalpies= -1055.089495  
Sum of electronic and thermal Free Energies= -1055.170433  
BP86/6-311++G(d,p)/SMD(THF)//BP86/6-31G(d) energy = -1055.83391432

### TS3c

-----

| Center<br>Number | Atomic<br>Number | Atomic<br>Type | Coordinates (Angstroms) |           |           |
|------------------|------------------|----------------|-------------------------|-----------|-----------|
|                  |                  |                | X                       | Y         | Z         |
| 1                | 6                | 0              | -4.507516               | 0.604028  | -0.258669 |
| 2                | 6                | 0              | -3.163949               | 0.573828  | 0.135950  |
| 3                | 6                | 0              | -2.416019               | -0.617512 | 0.023704  |
| 4                | 6                | 0              | -3.029362               | -1.763502 | -0.517144 |
| 5                | 6                | 0              | -4.375452               | -1.726905 | -0.917947 |
| 6                | 6                | 0              | -5.120008               | -0.545997 | -0.786283 |
| 7                | 1                | 0              | -5.079233               | 1.533721  | -0.158859 |
| 8                | 1                | 0              | -2.676940               | 1.469006  | 0.534457  |
| 9                | 1                | 0              | -2.458862               | -2.692080 | -0.632735 |
| 10               | 1                | 0              | -4.839525               | -2.628039 | -1.334881 |
| 11               | 1                | 0              | -6.169910               | -0.518341 | -1.098604 |
| 12               | 6                | 0              | -0.961901               | -0.628376 | 0.429912  |
| 13               | 6                | 0              | 0.848288                | 2.622739  | -0.389461 |
| 14               | 6                | 0              | -0.192801               | 3.466726  | -1.160422 |
| 15               | 1                | 0              | 0.217429                | 4.443993  | -1.477503 |
| 16               | 1                | 0              | -0.528677               | 2.923875  | -2.062421 |
| 17               | 1                | 0              | -1.076618               | 3.650752  | -0.524395 |
| 18               | 6                | 0              | 2.100701                | 2.364498  | -1.264983 |
| 19               | 1                | 0              | 2.565909                | 3.312489  | -1.593939 |
| 20               | 1                | 0              | 2.844882                | 1.788712  | -0.688238 |
| 21               | 1                | 0              | 1.821856                | 1.787723  | -2.165776 |
| 22               | 6                | 0              | 1.272940                | 3.343223  | 0.917731  |
| 23               | 1                | 0              | 0.389129                | 3.517874  | 1.554780  |
| 24               | 1                | 0              | 1.986292                | 2.715107  | 1.476874  |
| 25               | 1                | 0              | 1.746642                | 4.315735  | 0.689267  |
| 26               | 8                | 0              | 0.289815                | 1.390778  | 0.003018  |
| 27               | 7                | 0              | -0.682808               | 0.154114  | 1.590354  |
| 28               | 8                | 0              | 0.351827                | -0.375618 | 2.253752  |
| 29               | 6                | 0              | -0.192855               | -1.950941 | 0.579478  |

|    |   |   |           |           |           |
|----|---|---|-----------|-----------|-----------|
| 30 | 1 | 0 | -0.821575 | -2.718389 | 1.067318  |
| 31 | 6 | 0 | 0.945418  | -1.516018 | 1.498323  |
| 32 | 1 | 0 | 1.215399  | -2.252613 | 2.273378  |
| 33 | 6 | 0 | 2.252215  | -1.020187 | 0.847607  |
| 34 | 8 | 0 | 3.025727  | -0.245175 | 1.382271  |
| 35 | 8 | 0 | 2.465927  | -1.659060 | -0.331875 |
| 36 | 6 | 0 | 3.740326  | -1.354574 | -0.983166 |
| 37 | 1 | 0 | 3.704807  | -0.306637 | -1.326790 |
| 38 | 1 | 0 | 4.543953  | -1.438148 | -0.231468 |
| 39 | 6 | 0 | 3.908924  | -2.333125 | -2.134486 |
| 40 | 1 | 0 | 3.086864  | -2.235343 | -2.863791 |
| 41 | 1 | 0 | 4.859140  | -2.128001 | -2.657803 |
| 42 | 1 | 0 | 3.933215  | -3.374813 | -1.771504 |
| 43 | 1 | 0 | -0.385880 | 0.104745  | -0.342302 |
| 44 | 1 | 0 | 0.181294  | -2.344939 | -0.375728 |

-----

Zero-point correction= 0.355531 (Hartree/Particle)  
Thermal correction to Energy= 0.377905  
Thermal correction to Enthalpy= 0.378849  
Thermal correction to Gibbs Free Energy= 0.301827  
Sum of electronic and zero-point Energies= -978.700313  
Sum of electronic and thermal Energies= -978.677939  
Sum of electronic and thermal Enthalpies= -978.676995  
Sum of electronic and thermal Free Energies= -978.754018  
BP86/6-311++G(d,p)/SMD(THF)//BP86/6-31G(d) energy = -979.35504853

#### Product

-----

| Center<br>Number | Atomic<br>Number | Atomic<br>Type | Coordinates (Angstroms) |           |           |
|------------------|------------------|----------------|-------------------------|-----------|-----------|
|                  |                  |                | X                       | Y         | Z         |
| 1                | 6                | 0              | -1.732371               | 1.725870  | -0.131055 |
| 2                | 8                | 0              | -3.125197               | 1.329264  | -0.449297 |
| 3                | 6                | 0              | -0.905324               | 0.438507  | -0.294415 |
| 4                | 1                | 0              | -1.469464               | 2.531028  | -0.830807 |
| 5                | 1                | 0              | -1.717401               | 2.101453  | 0.906835  |
| 6                | 6                | 0              | -3.310681               | -0.028862 | -0.296596 |
| 7                | 8                | 0              | -4.401500               | -0.564467 | -0.395548 |
| 8                | 6                | 0              | -1.966023               | -0.578522 | 0.004891  |
| 9                | 7                | 0              | -1.599161               | -1.593040 | 0.720399  |
| 10               | 8                | 0              | -0.246165               | -1.432663 | 1.026332  |
| 11               | 6                | 0              | 0.166681                | 0.007066  | 0.715825  |
| 12               | 1                | 0              | 0.054053                | 0.549584  | 1.673242  |
| 13               | 6                | 0              | 1.603987                | 0.012026  | 0.264423  |
| 14               | 6                | 0              | 2.556842                | 0.758090  | 0.985473  |
| 15               | 6                | 0              | 2.015181                | -0.715568 | -0.873306 |
| 16               | 6                | 0              | 3.898046                | 0.792947  | 0.568678  |
| 17               | 1                | 0              | 2.243210                | 1.317508  | 1.874976  |
| 18               | 6                | 0              | 3.355996                | -0.687732 | -1.282885 |
| 19               | 1                | 0              | 1.286656                | -1.311969 | -1.434483 |
| 20               | 6                | 0              | 4.300340                | 0.069195  | -0.565245 |
| 21               | 1                | 0              | 4.628336                | 1.381944  | 1.134889  |
| 22               | 1                | 0              | 3.665905                | -1.259672 | -2.164803 |
| 23               | 1                | 0              | 5.347090                | 0.090424  | -0.888818 |
| 24               | 1                | 0              | -0.557407               | 0.335817  | -1.340453 |

-----

Zero-point correction= 0.226406 (Hartree/Particle)  
Thermal correction to Energy= 0.241359  
Thermal correction to Enthalpy= 0.242303  
Thermal correction to Gibbs Free Energy= 0.181301

Sum of electronic and zero-point Energies= -745.260795  
 Sum of electronic and thermal Energies= -745.245842  
 Sum of electronic and thermal Enthalpies= -745.244898  
 Sum of electronic and thermal Free Energies= -745.305900  
 BP86/6-311++G(d,p)/SMD(THF)//BP86/6-31G(d) energy = -745.71256103

### CuCl<sub>2</sub>

| Center Number | Atomic Number | Atomic Type | Coordinates (Angstroms) |          |           |
|---------------|---------------|-------------|-------------------------|----------|-----------|
|               |               |             | X                       | Y        | Z         |
| 1             | 29            | 0           | 0.000000                | 0.000000 | 0.000000  |
| 2             | 17            | 0           | 0.000000                | 0.000000 | 2.122888  |
| 3             | 17            | 0           | 0.000000                | 0.000000 | -2.122888 |

Zero-point correction= 0.002034 (Hartree/Particle)  
 Thermal correction to Energy= 0.006637  
 Thermal correction to Enthalpy= 0.007581  
 Thermal correction to Gibbs Free Energy= -0.025199  
 Sum of electronic and zero-point Energies= -1116.741985  
 Sum of electronic and thermal Energies= -1116.737382  
 Sum of electronic and thermal Enthalpies= -1116.736438  
 Sum of electronic and thermal Free Energies= -1116.769218  
 BP86/6-311++G(d,p)-SDD/SMD(THF)//BP86/6-31G(d)-LANL2DZ energy = -1118.04648592

### INT2'

| Center Number | Atomic Number | Atomic Type | Coordinates (Angstroms) |           |           |
|---------------|---------------|-------------|-------------------------|-----------|-----------|
|               |               |             | X                       | Y         | Z         |
| 1             | 6             | 0           | 0.028641                | -0.103443 | 1.187675  |
| 2             | 1             | 0           | 0.372801                | 0.732857  | 1.815200  |
| 3             | 7             | 0           | 0.361745                | -1.291288 | 1.758928  |
| 4             | 7             | 0           | 0.707976                | -2.298467 | 2.173337  |
| 5             | 6             | 0           | -1.298184               | 0.008633  | 0.535247  |
| 6             | 6             | 0           | -1.878780               | 1.297142  | 0.458028  |
| 7             | 6             | 0           | -1.965718               | -1.105494 | -0.024438 |
| 8             | 6             | 0           | -3.127341               | 1.458473  | -0.152878 |
| 9             | 1             | 0           | -1.334511               | 2.161405  | 0.853636  |
| 10            | 6             | 0           | -3.217289               | -0.930773 | -0.623606 |
| 11            | 1             | 0           | -1.494251               | -2.093886 | -0.014044 |
| 12            | 6             | 0           | -3.802526               | 0.347408  | -0.688485 |
| 13            | 1             | 0           | -3.572271               | 2.456980  | -0.214520 |
| 14            | 1             | 0           | -3.733124               | -1.794601 | -1.055357 |
| 15            | 1             | 0           | -4.778350               | 0.478184  | -1.167926 |
| 16            | 29            | 0           | 1.442567                | 0.241852  | -0.401581 |
| 17            | 17            | 0           | 1.523461                | -1.723156 | -1.351341 |
| 18            | 17            | 0           | 1.816797                | 2.331507  | 0.160385  |

Zero-point correction= 0.114507 (Hartree/Particle)  
 Thermal correction to Energy= 0.128011  
 Thermal correction to Enthalpy= 0.128955  
 Thermal correction to Gibbs Free Energy= 0.070341  
 Sum of electronic and zero-point Energies= -1496.460391  
 Sum of electronic and thermal Energies= -1496.446886  
 Sum of electronic and thermal Enthalpies= -1496.445942  
 Sum of electronic and thermal Free Energies= -1496.504556  
 BP86/6-311++G(d,p)-SDD/SMD(THF)//BP86/6-31G(d)-LANL2DZ energy = -1497.99007349

### TS1'

| Center Number | Atomic Number | Atomic Type | Coordinates (Angstroms) |           |           |
|---------------|---------------|-------------|-------------------------|-----------|-----------|
|               |               |             | X                       | Y         | Z         |
| 1             | 6             | 0           | -0.044894               | 0.166779  | 1.016540  |
| 2             | 1             | 0           | 0.027722                | 0.838276  | 1.882524  |
| 3             | 7             | 0           | 0.299411                | -1.393921 | 1.944721  |
| 4             | 7             | 0           | 0.826953                | -2.388077 | 1.849914  |
| 5             | 6             | 0           | -1.359708               | 0.032740  | 0.405466  |
| 6             | 6             | 0           | -2.450494               | 0.792137  | 0.912668  |
| 7             | 6             | 0           | -1.559368               | -0.806576 | -0.725468 |
| 8             | 6             | 0           | -3.701266               | 0.724667  | 0.292077  |
| 9             | 1             | 0           | -2.296142               | 1.441553  | 1.781377  |
| 10            | 6             | 0           | -2.818687               | -0.883274 | -1.325433 |
| 11            | 1             | 0           | -0.709778               | -1.381080 | -1.115178 |
| 12            | 6             | 0           | -3.886496               | -0.115666 | -0.821872 |
| 13            | 1             | 0           | -4.534969               | 1.322165  | 0.675273  |
| 14            | 1             | 0           | -2.970029               | -1.531142 | -2.194845 |
| 15            | 1             | 0           | -4.869131               | -0.169288 | -1.303467 |
| 16            | 29            | 0           | 1.475123                | 0.364712  | -0.240285 |
| 17            | 17            | 0           | 2.049095                | -1.616177 | -0.987991 |
| 18            | 17            | 0           | 1.457652                | 2.552179  | -0.061641 |

Zero-point correction= 0.112333 (Hartree/Particle)  
 Thermal correction to Energy= 0.125946  
 Thermal correction to Enthalpy= 0.126890  
 Thermal correction to Gibbs Free Energy= 0.067992  
 Sum of electronic and zero-point Energies= -1496.442187  
 Sum of electronic and thermal Energies= -1496.428574  
 Sum of electronic and thermal Enthalpies= -1496.427630  
 Sum of electronic and thermal Free Energies= -1496.486528  
 BP86/6-311++G(d,p)-SDD/SMD(THF)//BP86/6-31G(d)-LANL2DZ energy = -1497.96866462

**INT3'**

| Center Number | Atomic Number | Atomic Type | Coordinates (Angstroms) |           |           |
|---------------|---------------|-------------|-------------------------|-----------|-----------|
|               |               |             | X                       | Y         | Z         |
| 1             | 6             | 0           | 0.152998                | 1.345615  | 0.781605  |
| 2             | 1             | 0           | 0.364139                | 1.460293  | 1.851220  |
| 3             | 6             | 0           | -0.974488               | 0.531502  | 0.361098  |
| 4             | 6             | 0           | -1.525674               | -0.414864 | 1.299347  |
| 5             | 6             | 0           | -1.522081               | 0.563818  | -0.967027 |
| 6             | 6             | 0           | -2.560671               | -1.267889 | 0.919051  |
| 7             | 1             | 0           | -1.130508               | -0.441885 | 2.321459  |
| 8             | 6             | 0           | -2.558834               | -0.299139 | -1.321530 |
| 9             | 1             | 0           | -1.122862               | 1.285206  | -1.686543 |
| 10            | 6             | 0           | -3.084370               | -1.217538 | -0.389307 |
| 11            | 1             | 0           | -2.969445               | -1.976639 | 1.646812  |
| 12            | 1             | 0           | -2.966774               | -0.259047 | -2.337068 |
| 13            | 1             | 0           | -3.896269               | -1.891329 | -0.680986 |
| 14            | 29            | 0           | 1.020698                | -0.363494 | 0.107815  |
| 15            | 17            | 0           | 2.559743                | -1.761766 | -0.348913 |
| 16            | 17            | 0           | 0.649679                | 2.756807  | -0.141731 |

Zero-point correction= 0.105828 (Hartree/Particle)  
 Thermal correction to Energy= 0.116639  
 Thermal correction to Enthalpy= 0.117583  
 Thermal correction to Gibbs Free Energy= 0.065878  
 Sum of electronic and zero-point Energies= -1386.969643

Sum of electronic and thermal Energies= -1386.958832  
 Sum of electronic and thermal Enthalpies= -1386.957888  
 Sum of electronic and thermal Free Energies= -1387.009593  
 BP86/6-311++G(d,p)-SDD/SMD(THF)//BP86/6-31G(d)-LANL2DZ energy = -1388.45257080

**TS2'**

| Center Number | Atomic Number | Atomic Type | Coordinates (Angstroms) |           |           |
|---------------|---------------|-------------|-------------------------|-----------|-----------|
|               |               |             | X                       | Y         | Z         |
| 1             | 6             | 0           | -0.353292               | -0.340189 | 0.235959  |
| 2             | 1             | 0           | -0.551553               | -0.985233 | -0.622815 |
| 3             | 6             | 0           | 0.750678                | 0.610982  | 0.156438  |
| 4             | 6             | 0           | 1.261768                | 0.967010  | -1.148618 |
| 5             | 6             | 0           | 1.224574                | 1.351445  | 1.289009  |
| 6             | 6             | 0           | 2.183491                | 2.034693  | -1.282970 |
| 7             | 1             | 0           | 0.828586                | 0.505229  | -2.044757 |
| 8             | 6             | 0           | 2.132344                | 2.397999  | 1.124661  |
| 9             | 1             | 0           | 0.852172                | 1.087945  | 2.283018  |
| 10            | 6             | 0           | 2.612264                | 2.748547  | -0.157447 |
| 11            | 1             | 0           | 2.550770                | 2.296488  | -2.280498 |
| 12            | 1             | 0           | 2.475315                | 2.952190  | 2.004429  |
| 13            | 1             | 0           | 3.324962                | 3.571621  | -0.269570 |
| 14            | 29            | 0           | 2.420779                | -0.624465 | -0.319289 |
| 15            | 17            | 0           | 3.904433                | -2.149513 | -0.304523 |
| 16            | 17            | 0           | -0.689277               | -1.134973 | 1.752349  |
| 17            | 6             | 0           | -3.988610               | -0.396254 | -0.454458 |
| 18            | 6             | 0           | -4.610759               | 0.564334  | -1.483730 |
| 19            | 1             | 0           | -5.295166               | 0.021739  | -2.160263 |
| 20            | 1             | 0           | -5.180530               | 1.359396  | -0.973329 |
| 21            | 1             | 0           | -3.825093               | 1.040156  | -2.096783 |
| 22            | 6             | 0           | -5.065639               | -1.015597 | 0.452642  |
| 23            | 1             | 0           | -5.779308               | -1.600488 | -0.153923 |
| 24            | 1             | 0           | -4.607749               | -1.684980 | 1.200506  |
| 25            | 1             | 0           | -5.623548               | -0.227199 | 0.985672  |
| 26            | 6             | 0           | -3.165067               | -1.495783 | -1.145166 |
| 27            | 1             | 0           | -2.411868               | -1.069175 | -1.829788 |
| 28            | 1             | 0           | -2.664618               | -2.141800 | -0.403447 |
| 29            | 1             | 0           | -3.835698               | -2.131610 | -1.750058 |
| 30            | 8             | 0           | -3.201375               | 0.400358  | 0.498136  |
| 31            | 7             | 0           | -1.959305               | 0.981781  | -0.068756 |
| 32            | 8             | 0           | -1.710163               | 2.039127  | 0.467031  |

Zero-point correction= 0.235989 (Hartree/Particle)  
 Thermal correction to Energy= 0.256236  
 Thermal correction to Enthalpy= 0.257180  
 Thermal correction to Gibbs Free Energy= 0.183506  
 Sum of electronic and zero-point Energies= -1749.782408  
 Sum of electronic and thermal Energies= -1749.762161  
 Sum of electronic and thermal Enthalpies= -1749.761216  
 Sum of electronic and thermal Free Energies= -1749.834891  
 BP86/6-311++G(d,p)-SDD/SMD(THF)//BP86/6-31G(d)-LANL2DZ energy = -1751.51710849

**INT4'**

| Center Number | Atomic Number | Atomic Type | Coordinates (Angstroms) |           |           |
|---------------|---------------|-------------|-------------------------|-----------|-----------|
|               |               |             | X                       | Y         | Z         |
| 1             | 6             | 0           | -0.473253               | -0.334642 | -0.134841 |
| 2             | 1             | 0           | -0.502563               | -0.826894 | -1.115255 |

|    |    |   |           |           |           |
|----|----|---|-----------|-----------|-----------|
| 3  | 6  | 0 | 0.681759  | 0.636502  | -0.005904 |
| 4  | 6  | 0 | 1.338303  | 1.100646  | -1.195229 |
| 5  | 6  | 0 | 0.988238  | 1.264251  | 1.238444  |
| 6  | 6  | 0 | 2.251122  | 2.187416  | -1.118662 |
| 7  | 1  | 0 | 1.040013  | 0.707016  | -2.174728 |
| 8  | 6  | 0 | 1.883633  | 2.337011  | 1.285381  |
| 9  | 1  | 0 | 0.498291  | 0.901453  | 2.145486  |
| 10 | 6  | 0 | 2.507450  | 2.807502  | 0.108475  |
| 11 | 1  | 0 | 2.742009  | 2.535041  | -2.033052 |
| 12 | 1  | 0 | 2.102252  | 2.812411  | 2.246896  |
| 13 | 1  | 0 | 3.206547  | 3.648370  | 0.159228  |
| 14 | 29 | 0 | 2.481843  | -0.469658 | -0.294022 |
| 15 | 17 | 0 | 4.136814  | -1.809574 | -0.240723 |
| 16 | 17 | 0 | -0.308196 | -1.730705 | 1.104634  |
| 17 | 6  | 0 | -4.169013 | -0.143956 | -0.335788 |
| 18 | 6  | 0 | -4.490257 | -0.551975 | 1.111912  |
| 19 | 1  | 0 | -5.581986 | -0.494613 | 1.272277  |
| 20 | 1  | 0 | -4.168440 | -1.591259 | 1.294988  |
| 21 | 1  | 0 | -3.995013 | 0.106440  | 1.840125  |
| 22 | 6  | 0 | -4.872942 | -1.082712 | -1.332162 |
| 23 | 1  | 0 | -5.966062 | -0.985602 | -1.214415 |
| 24 | 1  | 0 | -4.608382 | -0.825208 | -2.371823 |
| 25 | 1  | 0 | -4.594255 | -2.133909 | -1.146948 |
| 26 | 6  | 0 | -4.508410 | 1.325273  | -0.638992 |
| 27 | 1  | 0 | -3.993904 | 2.009368  | 0.052182  |
| 28 | 1  | 0 | -4.224648 | 1.580149  | -1.674939 |
| 29 | 1  | 0 | -5.597464 | 1.476746  | -0.534113 |
| 30 | 8  | 0 | -2.750346 | -0.431634 | -0.654757 |
| 31 | 7  | 0 | -1.745165 | 0.356638  | 0.029754  |
| 32 | 8  | 0 | -2.002151 | 1.071253  | 1.028527  |

-----

Zero-point correction= 0.238857 (Hartree/Particle)  
Thermal correction to Energy= 0.259159  
Thermal correction to Enthalpy= 0.260103  
Thermal correction to Gibbs Free Energy= 0.186309  
Sum of electronic and zero-point Energies= -1749.803407  
Sum of electronic and thermal Energies= -1749.783105  
Sum of electronic and thermal Enthalpies= -1749.782161  
Sum of electronic and thermal Free Energies= -1749.855955  
BP86/6-311++G(d,p)-SDD/SMD(THF)//BP86/6-31G(d)-LANL2DZ energy = -1751.53694330

### TS3'

-----

| Center<br>Number | Atomic<br>Number | Atomic<br>Type | Coordinates (Angstroms) |           |           |
|------------------|------------------|----------------|-------------------------|-----------|-----------|
|                  |                  |                | X                       | Y         | Z         |
| 1                | 6                | 0              | -0.689207               | 0.422073  | -0.758269 |
| 2                | 1                | 0              | -1.008787               | 0.567958  | -1.794374 |
| 3                | 6                | 0              | 0.531896                | 1.178777  | -0.353863 |
| 4                | 6                | 0              | 1.136612                | 2.044656  | -1.285380 |
| 5                | 6                | 0              | 1.140044                | 0.967990  | 0.923841  |
| 6                | 6                | 0              | 2.337946                | 2.705249  | -0.967550 |
| 7                | 1                | 0              | 0.672209                | 2.193172  | -2.266608 |
| 8                | 6                | 0              | 2.382956                | 1.594160  | 1.202069  |
| 9                | 1                | 0              | 0.591910                | 0.433489  | 1.707672  |
| 10               | 6                | 0              | 2.972688                | 2.465638  | 0.258127  |
| 11               | 1                | 0              | 2.792418                | 3.380839  | -1.699321 |
| 12               | 1                | 0              | 2.849058                | 1.448882  | 2.181732  |
| 13               | 1                | 0              | 3.928459                | 2.946188  | 0.488957  |
| 14               | 29               | 0              | 2.285897                | -0.642561 | 0.207090  |

|    |    |   |           |           |           |
|----|----|---|-----------|-----------|-----------|
| 15 | 17 | 0 | 3.973008  | -1.981658 | 0.045570  |
| 16 | 17 | 0 | -0.081465 | -1.530068 | -0.798969 |
| 17 | 6  | 0 | -4.199029 | -0.205516 | 0.096807  |
| 18 | 6  | 0 | -3.875097 | -1.493002 | 0.868698  |
| 19 | 1  | 0 | -4.816870 | -1.927080 | 1.249156  |
| 20 | 1  | 0 | -3.397334 | -2.232394 | 0.203918  |
| 21 | 1  | 0 | -3.212311 | -1.305995 | 1.726751  |
| 22 | 6  | 0 | -5.150330 | -0.494733 | -1.077058 |
| 23 | 1  | 0 | -6.119149 | -0.842407 | -0.679052 |
| 24 | 1  | 0 | -5.326591 | 0.414765  | -1.676266 |
| 25 | 1  | 0 | -4.740777 | -1.279158 | -1.735436 |
| 26 | 6  | 0 | -4.753780 | 0.918358  | 0.986272  |
| 27 | 1  | 0 | -4.069761 | 1.154688  | 1.814124  |
| 28 | 1  | 0 | -4.926170 | 1.831121  | 0.390146  |
| 29 | 1  | 0 | -5.721791 | 0.598813  | 1.411587  |
| 30 | 8  | 0 | -2.998879 | 0.273642  | -0.655116 |
| 31 | 7  | 0 | -1.811958 | 0.528121  | 0.091118  |
| 32 | 8  | 0 | -1.784403 | 0.555357  | 1.340014  |

-----

Zero-point correction= 0.238163 (Hartree/Particle)  
Thermal correction to Energy= 0.258100  
Thermal correction to Enthalpy= 0.259044  
Thermal correction to Gibbs Free Energy= 0.185214  
Sum of electronic and zero-point Energies= -1749.803525  
Sum of electronic and thermal Energies= -1749.783588  
Sum of electronic and thermal Enthalpies= -1749.782644  
Sum of electronic and thermal Free Energies= -1749.856474  
BP86/6-311++G(d,p)-SDD/SMD(THF)//BP86/6-31G(d)-LANL2DZ energy = -1751.53421180

## INT2''

-----

| Center<br>Number | Atomic<br>Number | Atomic<br>Type | Coordinates (Angstroms) |           |           |
|------------------|------------------|----------------|-------------------------|-----------|-----------|
|                  |                  |                | X                       | Y         | Z         |
| 1                | 6                | 0              | -1.200459               | -0.902128 | 1.091917  |
| 2                | 1                | 0              | -0.796759               | -0.665776 | 2.089403  |
| 3                | 7                | 0              | -1.734515               | -2.152328 | 1.096338  |
| 4                | 7                | 0              | -2.176119               | -3.211082 | 1.055828  |
| 5                | 6                | 0              | -2.010492               | 0.165271  | 0.415947  |
| 6                | 6                | 0              | -1.909336               | 1.489161  | 0.899637  |
| 7                | 6                | 0              | -2.838518               | -0.103287 | -0.696914 |
| 8                | 6                | 0              | -2.629451               | 2.520975  | 0.281820  |
| 9                | 1                | 0              | -1.254328               | 1.704823  | 1.750805  |
| 10               | 6                | 0              | -3.561027               | 0.934330  | -1.301396 |
| 11               | 1                | 0              | -2.912904               | -1.121690 | -1.095275 |
| 12               | 6                | 0              | -3.461145               | 2.249684  | -0.817231 |
| 13               | 1                | 0              | -2.542579               | 3.542785  | 0.667812  |
| 14               | 1                | 0              | -4.201170               | 0.711590  | -2.161968 |
| 15               | 1                | 0              | -4.025015               | 3.057571  | -1.295384 |
| 16               | 29               | 0              | 0.468384                | -0.979815 | -0.050174 |
| 17               | 17               | 0              | 1.820177                | -1.812424 | -1.552721 |
| 18               | 6                | 0              | 2.837831                | 0.481274  | 1.293617  |

|    |   |   |          |           |           |
|----|---|---|----------|-----------|-----------|
| 19 | 6 | 0 | 3.831566 | 1.428650  | 0.603908  |
| 20 | 6 | 0 | 3.103239 | 1.763015  | -0.713702 |
| 21 | 6 | 0 | 1.652787 | 1.869096  | -0.242463 |
| 22 | 1 | 0 | 3.024400 | -0.572761 | 1.018601  |
| 23 | 1 | 0 | 2.821501 | 0.581104  | 2.393694  |
| 24 | 1 | 0 | 3.986376 | 2.342987  | 1.206067  |
| 25 | 1 | 0 | 4.812532 | 0.950652  | 0.444534  |
| 26 | 1 | 0 | 3.465391 | 2.691168  | -1.187808 |
| 27 | 1 | 0 | 3.197677 | 0.926694  | -1.428524 |
| 28 | 1 | 0 | 1.433033 | 2.856758  | 0.211443  |
| 29 | 1 | 0 | 0.907658 | 1.658729  | -1.027113 |
| 30 | 8 | 0 | 1.505314 | 0.841106  | 0.788626  |

-----

Zero-point correction= 0.228550 (Hartree/Particle)  
Thermal correction to Energy= 0.246827  
Thermal correction to Enthalpy= 0.247771  
Thermal correction to Gibbs Free Energy= 0.176585  
Sum of electronic and zero-point Energies= -1268.564841  
Sum of electronic and thermal Energies= -1268.546564  
Sum of electronic and thermal Enthalpies= -1268.545620  
Sum of electronic and thermal Free Energies= -1268.616806  
BP86/6-311++G(d,p)/SDD/SMD// BP86/6-31G(d)/LANL2DZ energy in THF= -1270.23377483

### TS1''

-----

| Center<br>Number | Atomic<br>Number | Atomic<br>Type | Coordinates (Angstroms) |           |           |
|------------------|------------------|----------------|-------------------------|-----------|-----------|
|                  |                  |                | X                       | Y         | Z         |
| 1                | 6                | 0              | -1.169989               | 0.604962  | -0.992442 |
| 2                | 1                | 0              | -1.182117               | 0.553933  | -2.096223 |
| 3                | 7                | 0              | -1.751239               | 2.293728  | -0.923353 |
| 4                | 7                | 0              | -1.901832               | 3.316573  | -0.466230 |
| 5                | 6                | 0              | -2.264086               | -0.187208 | -0.383601 |
| 6                | 6                | 0              | -3.138666               | -0.960699 | -1.187180 |
| 7                | 6                | 0              | -2.396469               | -0.254093 | 1.027697  |
| 8                | 6                | 0              | -4.094020               | -1.799586 | -0.598705 |
| 9                | 1                | 0              | -3.051227               | -0.907314 | -2.279086 |
| 10               | 6                | 0              | -3.371121               | -1.069611 | 1.612548  |
| 11               | 1                | 0              | -1.716842               | 0.341007  | 1.650547  |
| 12               | 6                | 0              | -4.217289               | -1.848460 | 0.800910  |
| 13               | 1                | 0              | -4.752663               | -2.406067 | -1.230037 |
| 14               | 1                | 0              | -3.466322               | -1.110063 | 2.703010  |
| 15               | 1                | 0              | -4.972960               | -2.494955 | 1.260858  |
| 16               | 29               | 0              | 0.518660                | 0.723628  | -0.109113 |



|    |    |   |          |           |           |
|----|----|---|----------|-----------|-----------|
| 17 | 17 | 0 | 1.890180 | 1.735613  | 1.325509  |
| 18 | 6  | 0 | 3.048990 | -0.534403 | -1.311234 |
| 19 | 6  | 0 | 4.179111 | -1.426425 | -0.790860 |
| 20 | 6  | 0 | 3.762965 | -1.617304 | 0.681542  |
| 21 | 6  | 0 | 2.239189 | -1.751760 | 0.577663  |
| 22 | 1  | 0 | 3.226479 | 0.527194  | -1.054217 |
| 23 | 1  | 0 | 2.852366 | -0.631947 | -2.392742 |
| 24 | 1  | 0 | 4.193662 | -2.394186 | -1.325616 |
| 25 | 1  | 0 | 5.168800 | -0.951863 | -0.902226 |
| 26 | 1  | 0 | 4.231055 | -2.495109 | 1.158658  |
| 27 | 1  | 0 | 4.012228 | -0.715191 | 1.266676  |
| 28 | 1  | 0 | 1.914299 | -2.797706 | 0.417613  |
| 29 | 1  | 0 | 1.713801 | -1.325517 | 1.448436  |
| 30 | 8  | 0 | 1.844382 | -0.985932 | -0.610747 |

-----

Zero-point correction= 0.226767 (Hartree/Particle)  
Thermal correction to Energy= 0.244965  
Thermal correction to Enthalpy= 0.245909  
Thermal correction to Gibbs Free Energy= 0.175239  
Sum of electronic and zero-point Energies= -1268.548222  
Sum of electronic and thermal Energies= -1268.530024  
Sum of electronic and thermal Enthalpies= -1268.529080  
Sum of electronic and thermal Free Energies= -1268.599750  
BP86/6-311++G(d,p)/SDD/SMD// BP86/6-31G(d)/LANL2DZ energy in THF= -1270.21563018

### INT3''

-----

| Center<br>Number | Atomic<br>Number | Atomic<br>Type | Coordinates (Angstroms) |           |           |
|------------------|------------------|----------------|-------------------------|-----------|-----------|
|                  |                  |                | X                       | Y         | Z         |
| 1                | 6                | 0              | -1.306584               | -0.477338 | 1.030387  |
| 2                | 1                | 0              | -1.454917               | -0.923044 | 2.036456  |
| 3                | 6                | 0              | -2.562646               | -0.067363 | 0.466504  |
| 4                | 6                | 0              | -3.784347               | -0.159595 | 1.205097  |
| 5                | 6                | 0              | -2.623795               | 0.464457  | -0.859688 |
| 6                | 6                | 0              | -4.993930               | 0.269601  | 0.655202  |
| 7                | 1                | 0              | -3.753259               | -0.571752 | 2.220782  |
| 8                | 6                | 0              | -3.834962               | 0.878921  | -1.413528 |
| 9                | 1                | 0              | -1.690926               | 0.522195  | -1.432361 |
| 10               | 6                | 0              | -5.020149               | 0.785799  | -0.655340 |
| 11               | 1                | 0              | -5.921084               | 0.198681  | 1.234229  |
| 12               | 1                | 0              | -3.868452               | 1.275326  | -2.433987 |
| 13               | 1                | 0              | -5.970775               | 1.114004  | -1.090923 |
| 14               | 29               | 0              | 0.386101                | -0.547886 | 0.276117  |

|    |    |   |          |           |           |
|----|----|---|----------|-----------|-----------|
| 15 | 17 | 0 | 1.581702 | -1.936329 | -1.025599 |
| 16 | 6  | 0 | 3.139958 | 0.311796  | 1.258849  |
| 17 | 6  | 0 | 4.383081 | 0.983684  | 0.671069  |
| 18 | 6  | 0 | 4.008203 | 1.071008  | -0.822403 |
| 19 | 6  | 0 | 2.514427 | 1.413644  | -0.770836 |
| 20 | 1  | 0 | 3.165563 | -0.784136 | 1.111614  |
| 21 | 1  | 0 | 2.948788 | 0.547764  | 2.319262  |
| 22 | 1  | 0 | 4.526035 | 1.991748  | 1.102206  |
| 23 | 1  | 0 | 5.298141 | 0.394838  | 0.852194  |
| 24 | 1  | 0 | 4.592491 | 1.825457  | -1.376042 |
| 25 | 1  | 0 | 4.144181 | 0.088353  | -1.306154 |
| 26 | 1  | 0 | 2.328211 | 2.503607  | -0.736033 |
| 27 | 1  | 0 | 1.943039 | 0.958902  | -1.597034 |
| 28 | 8  | 0 | 2.013948 | 0.852082  | 0.491463  |

-----

Zero-point correction= 0.219884 (Hartree/Particle)  
Thermal correction to Energy= 0.235514  
Thermal correction to Enthalpy= 0.236458  
Thermal correction to Gibbs Free Energy= 0.172978  
Sum of electronic and zero-point Energies= -1159.054055  
Sum of electronic and thermal Energies= -1159.038425  
Sum of electronic and thermal Enthalpies= -1159.037481  
Sum of electronic and thermal Free Energies= -1159.100960  
BP86/6-311++G(d,p)/SDD/SMD// BP86/6-31G(d)/LANL2DZ energy in THF= -1160.68575557

## TS2''

-----

| Center<br>Number | Atomic<br>Number | Atomic<br>Type | Coordinates (Angstroms) |           |           |
|------------------|------------------|----------------|-------------------------|-----------|-----------|
|                  |                  |                | X                       | Y         | Z         |
| 1                | 6                | 0              | 0.323888                | 0.834780  | 0.534359  |
| 2                | 1                | 0              | 0.732708                | 0.739487  | 1.555480  |
| 3                | 6                | 0              | -0.075077               | 2.202974  | 0.225686  |
| 4                | 6                | 0              | 0.034644                | 3.242027  | 1.191183  |
| 5                | 6                | 0              | -0.647069               | 2.516522  | -1.038703 |
| 6                | 6                | 0              | -0.441241               | 4.529012  | 0.918844  |
| 7                | 1                | 0              | 0.487669                | 3.016418  | 2.164279  |
| 8                | 6                | 0              | -1.098143               | 3.809045  | -1.320564 |
| 9                | 1                | 0              | -0.720170               | 1.719183  | -1.788514 |
| 10               | 6                | 0              | -1.002326               | 4.814718  | -0.339742 |
| 11               | 1                | 0              | -0.366716               | 5.315730  | 1.677678  |
| 12               | 1                | 0              | -1.530590               | 4.038003  | -2.300514 |
| 13               | 1                | 0              | -1.364210               | 5.825890  | -0.558012 |
| 14               | 6                | 0              | 3.387971                | -1.308393 | 0.472201  |

|    |    |   |           |           |           |
|----|----|---|-----------|-----------|-----------|
| 15 | 6  | 0 | 4.891630  | -1.432794 | 0.775720  |
| 16 | 1  | 0 | 5.087037  | -2.400404 | 1.270305  |
| 17 | 1  | 0 | 5.482388  | -1.393956 | -0.154847 |
| 18 | 1  | 0 | 5.231252  | -0.622022 | 1.443184  |
| 19 | 6  | 0 | 2.905552  | -2.423743 | -0.463407 |
| 20 | 1  | 0 | 2.969887  | -3.396696 | 0.056386  |
| 21 | 1  | 0 | 1.857512  | -2.270344 | -0.776635 |
| 22 | 1  | 0 | 3.536416  | -2.471638 | -1.367208 |
| 23 | 6  | 0 | 2.574020  | -1.236832 | 1.767180  |
| 24 | 1  | 0 | 2.816930  | -0.329059 | 2.347367  |
| 25 | 1  | 0 | 1.490499  | -1.273381 | 1.570015  |
| 26 | 1  | 0 | 2.830694  | -2.113153 | 2.388160  |
| 27 | 8  | 0 | 3.357414  | -0.041655 | -0.324426 |
| 28 | 7  | 0 | 2.271579  | 0.874541  | -0.270794 |
| 29 | 8  | 0 | 2.454384  | 1.772958  | -1.043303 |
| 30 | 29 | 0 | -0.394133 | -0.677641 | -0.334318 |
| 31 | 17 | 0 | -0.694162 | -2.270630 | -1.836750 |
| 32 | 6  | 0 | -3.254619 | -0.368925 | 1.312254  |
| 33 | 6  | 0 | -4.363498 | -0.847708 | 0.341887  |
| 34 | 6  | 0 | -3.949613 | -2.310474 | -0.003835 |
| 35 | 6  | 0 | -2.759581 | -2.584521 | 0.931184  |
| 36 | 1  | 0 | -2.868754 | 0.641796  | 1.103085  |
| 37 | 1  | 0 | -3.601874 | -0.407719 | 2.366260  |
| 38 | 1  | 0 | -5.356799 | -0.791968 | 0.819821  |
| 39 | 1  | 0 | -4.395623 | -0.224650 | -0.567570 |
| 40 | 1  | 0 | -4.770373 | -3.032710 | 0.145049  |
| 41 | 1  | 0 | -3.603697 | -2.378680 | -1.048058 |
| 42 | 1  | 0 | -3.083576 | -2.995654 | 1.911148  |
| 43 | 1  | 0 | -1.987715 | -3.228031 | 0.482924  |
| 44 | 8  | 0 | -2.149617 | -1.287562 | 1.149010  |

-----

Zero-point correction= 0.349926 (Hartree/Particle)

Thermal correction to Energy= 0.375306

Thermal correction to Enthalpy= 0.376250

Thermal correction to Gibbs Free Energy= 0.288117

Sum of electronic and zero-point Energies= -1521.880432

Sum of electronic and thermal Energies= -1521.855052

Sum of electronic and thermal Enthalpies= -1521.854108

Sum of electronic and thermal Free Energies= -1521.942241

BP86/6-311++G(d,p)/SDD/SMD// BP86/6-31G(d)/LANL2DZ energy in THF= -1523.75735092

#### INT4''

-----

| Center | Atomic | Atomic | Coordinates (Angstroms) |
|--------|--------|--------|-------------------------|
|--------|--------|--------|-------------------------|

| Number | Number | Type | X         | Y         | Z         |
|--------|--------|------|-----------|-----------|-----------|
| 1      | 6      | 0    | 1.098696  | 1.010078  | 0.970193  |
| 2      | 1      | 0    | 1.196004  | 0.607380  | 1.977450  |
| 3      | 6      | 0    | -0.113772 | 1.713041  | 0.565863  |
| 4      | 6      | 0    | -1.050778 | 2.065943  | 1.595243  |
| 5      | 6      | 0    | -0.398726 | 2.137985  | -0.784323 |
| 6      | 6      | 0    | -2.173751 | 2.839364  | 1.311884  |
| 7      | 1      | 0    | -0.851560 | 1.737184  | 2.621357  |
| 8      | 6      | 0    | -1.557979 | 2.918342  | -1.039870 |
| 9      | 1      | 0    | 0.353390  | 1.994789  | -1.563585 |
| 10     | 6      | 0    | -2.432634 | 3.273024  | -0.010854 |
| 11     | 1      | 0    | -2.857143 | 3.115161  | 2.122649  |
| 12     | 1      | 0    | -1.749197 | 3.245693  | -2.067049 |
| 13     | 1      | 0    | -3.316237 | 3.883660  | -0.224425 |
| 14     | 6      | 0    | 4.146571  | -0.661456 | 0.206457  |
| 15     | 6      | 0    | 4.895641  | -1.344880 | 1.364479  |
| 16     | 1      | 0    | 5.639097  | -2.051536 | 0.956307  |
| 17     | 1      | 0    | 5.427657  | -0.600175 | 1.981123  |
| 18     | 1      | 0    | 4.197982  | -1.903558 | 2.011374  |
| 19     | 6      | 0    | 5.127368  | 0.129508  | -0.676603 |
| 20     | 1      | 0    | 5.890477  | -0.556134 | -1.087999 |
| 21     | 1      | 0    | 4.608651  | 0.623924  | -1.509830 |
| 22     | 1      | 0    | 5.643785  | 0.898235  | -0.075743 |
| 23     | 6      | 0    | 3.314191  | -1.678955 | -0.586206 |
| 24     | 1      | 0    | 2.609894  | -2.208630 | 0.078935  |
| 25     | 1      | 0    | 2.745430  | -1.197178 | -1.397070 |
| 26     | 1      | 0    | 3.986388  | -2.429378 | -1.038749 |
| 27     | 8      | 0    | 3.266899  | 0.265351  | 0.969350  |
| 28     | 7      | 0    | 2.178989  | 0.863589  | 0.206413  |
| 29     | 8      | 0    | 2.360181  | 1.199765  | -0.980108 |
| 30     | 29     | 0    | -1.042778 | 0.086085  | -0.552293 |
| 31     | 17     | 0    | -1.357701 | -1.187214 | -2.335271 |
| 32     | 6      | 0    | -3.152474 | -1.005258 | 1.416213  |
| 33     | 6      | 0    | -3.839918 | -1.947477 | 0.424693  |
| 34     | 6      | 0    | -2.868986 | -3.157842 | 0.370514  |
| 35     | 6      | 0    | -1.527179 | -2.590719 | 0.901058  |
| 36     | 1      | 0    | -3.389708 | 0.063708  | 1.291834  |
| 37     | 1      | 0    | -3.343705 | -1.299025 | 2.469925  |
| 38     | 1      | 0    | -4.859968 | -2.225277 | 0.740727  |
| 39     | 1      | 0    | -3.888464 | -1.465948 | -0.566652 |
| 40     | 1      | 0    | -3.220590 | -3.988558 | 1.006952  |
| 41     | 1      | 0    | -2.760306 | -3.525634 | -0.661555 |
| 42     | 1      | 0    | -1.229083 | -3.052519 | 1.862363  |

|    |   |   |           |           |          |
|----|---|---|-----------|-----------|----------|
| 43 | 1 | 0 | -0.705328 | -2.670944 | 0.173847 |
| 44 | 8 | 0 | -1.734148 | -1.159912 | 1.135327 |

-----

Zero-point correction= 0.353439 (Hartree/Particle)  
Thermal correction to Energy= 0.378497  
Thermal correction to Enthalpy= 0.379441  
Thermal correction to Gibbs Free Energy= 0.294509  
Sum of electronic and zero-point Energies= -1521.936974  
Sum of electronic and thermal Energies= -1521.911917  
Sum of electronic and thermal Enthalpies= -1521.910973  
Sum of electronic and thermal Free Energies= -1521.995905  
BP86/6-311++G(d,p)/SDD/SMD// BP86/6-31G(d)/LANL2DZ energy in THF= -1523.81299417

### CuCl-THF

-----

| Center<br>Number | Atomic<br>Number | Atomic<br>Type | Coordinates (Angstroms) |           |           |
|------------------|------------------|----------------|-------------------------|-----------|-----------|
|                  |                  |                | X                       | Y         | Z         |
| 1                | 29               | 0              | 1.062162                | -0.001963 | -0.009536 |
| 2                | 17               | 0              | 3.171927                | 0.001822  | 0.015212  |
| 3                | 6                | 0              | -1.697164               | 1.201188  | -0.133880 |
| 4                | 6                | 0              | -3.106164               | 0.736034  | 0.248252  |
| 5                | 6                | 0              | -3.112635               | -0.733542 | -0.222892 |
| 6                | 6                | 0              | -1.698807               | -1.198251 | 0.136432  |
| 7                | 1                | 0              | -1.638189               | 1.563160  | -1.176489 |
| 8                | 1                | 0              | -1.271103               | 1.960740  | 0.541153  |
| 9                | 1                | 0              | -3.249435               | 0.792684  | 1.342063  |
| 10               | 1                | 0              | -3.887405               | 1.346274  | -0.233916 |
| 11               | 1                | 0              | -3.886866               | -1.341249 | 0.273603  |
| 12               | 1                | 0              | -3.273200               | -0.791626 | -1.314231 |
| 13               | 1                | 0              | -1.617875               | -1.529866 | 1.188070  |
| 14               | 1                | 0              | -1.292048               | -1.979350 | -0.525538 |
| 15               | 8                | 0              | -0.865090               | -0.003423 | -0.030532 |

-----

Zero-point correction= 0.116792 (Hartree/Particle)  
Thermal correction to Energy= 0.124761  
Thermal correction to Enthalpy= 0.125705  
Thermal correction to Gibbs Free Energy= 0.081864  
Sum of electronic and zero-point Energies= -888.870907  
Sum of electronic and thermal Energies= -888.862938  
Sum of electronic and thermal Enthalpies= -888.861993  
Sum of electronic and thermal Free Energies= -888.905835  
BP86/6-311++G(d,p)/SDD/SMD// BP86/6-31G(d)/LANL2DZ energy in THF= -890.32376157

TS2c

| Center<br>Number | Atomic<br>Number | Atomic<br>Type | Coordinates (Angstroms) |           |           |
|------------------|------------------|----------------|-------------------------|-----------|-----------|
|                  |                  |                | X                       | Y         | Z         |
| 1                | 6                | 0              | -1.774504               | 2.989479  | 0.927072  |
| 2                | 6                | 0              | -0.771589               | 2.014605  | 0.874066  |
| 3                | 6                | 0              | -0.635364               | 1.197103  | -0.273337 |
| 4                | 6                | 0              | -1.544536               | 1.371726  | -1.345995 |
| 5                | 6                | 0              | -2.555815               | 2.337768  | -1.278429 |
| 6                | 6                | 0              | -2.671693               | 3.154656  | -0.141472 |
| 7                | 1                | 0              | -1.864323               | 3.619292  | 1.819098  |
| 8                | 1                | 0              | -0.080144               | 1.877615  | 1.708458  |
| 9                | 1                | 0              | -1.446741               | 0.743867  | -2.239676 |
| 10               | 1                | 0              | -3.246453               | 2.461542  | -2.120185 |
| 11               | 1                | 0              | -3.459329               | 3.914467  | -0.087664 |
| 12               | 6                | 0              | 0.402913                | 0.171061  | -0.439257 |
| 13               | 6                | 0              | 3.846241                | -0.203408 | -0.559775 |
| 14               | 6                | 0              | 4.596321                | -1.411826 | -1.141985 |
| 15               | 1                | 0              | 5.631855                | -1.125212 | -1.395303 |
| 16               | 1                | 0              | 4.631937                | -2.236775 | -0.410093 |
| 17               | 1                | 0              | 4.100152                | -1.776947 | -2.057581 |
| 18               | 6                | 0              | 4.506945                | 0.278870  | 0.742649  |
| 19               | 1                | 0              | 5.545376                | 0.597446  | 0.539328  |
| 20               | 1                | 0              | 3.960975                | 1.129384  | 1.180838  |
| 21               | 1                | 0              | 4.528017                | -0.533453 | 1.488355  |
| 22               | 6                | 0              | 3.730632                | 0.929609  | -1.591543 |
| 23               | 1                | 0              | 3.246318                | 0.568634  | -2.516061 |
| 24               | 1                | 0              | 3.138782                | 1.770060  | -1.190547 |
| 25               | 1                | 0              | 4.732641                | 1.312932  | -1.854129 |
| 26               | 8                | 0              | 2.516068                | -0.781834 | -0.293865 |
| 27               | 7                | 0              | 1.576652                | 0.200178  | 0.255536  |
| 28               | 8                | 0              | 1.559733                | 0.270451  | 1.538634  |
| 29               | 6                | 0              | -0.305359               | -1.609662 | 0.853023  |
| 30               | 6                | 0              | 0.437001                | -1.340820 | 2.010705  |
| 31               | 1                | 0              | -0.076433               | -0.884390 | 2.861913  |
| 32               | 1                | 0              | 0.517102                | -0.251430 | -1.441852 |
| 33               | 1                | 0              | 0.058550                | -2.337506 | 0.120872  |
| 34               | 6                | 0              | -1.760693               | -1.340642 | 0.857419  |
| 35               | 8                | 0              | -2.381426               | -0.728352 | 1.722638  |
| 36               | 8                | 0              | -2.355215               | -1.871182 | -0.263173 |
| 37               | 6                | 0              | -3.790587               | -1.659993 | -0.342466 |
| 38               | 1                | 0              | -3.986182               | -0.573916 | -0.395538 |
| 39               | 1                | 0              | -4.260489               | -2.035440 | 0.583969  |

|    |   |   |           |           |           |
|----|---|---|-----------|-----------|-----------|
| 40 | 6 | 0 | -4.291907 | -2.395279 | -1.577473 |
| 41 | 1 | 0 | -5.383448 | -2.261109 | -1.677911 |
| 42 | 1 | 0 | -3.811078 | -2.009017 | -2.492807 |
| 43 | 1 | 0 | -4.081255 | -3.476268 | -1.507129 |
| 44 | 1 | 0 | 1.346294  | -1.907178 | 2.221797  |

-----

Zero-point correction= 0.357998 (Hartree/Particle)  
Thermal correction to Energy= 0.380720  
Thermal correction to Enthalpy= 0.381664  
Thermal correction to Gibbs Free Energy= 0.304704  
Sum of electronic and zero-point Energies= -978.707651  
Sum of electronic and thermal Energies= -978.684929  
Sum of electronic and thermal Enthalpies= -978.683985  
Sum of electronic and thermal Free Energies= -978.760944  
BP86/6-311++G(d,p)/SMD//BP86/6-31G(d) energy in THF= -979.36339460

### INT3-a

-----

| Center<br>Number | Atomic<br>Number | Atomic<br>Type | Coordinates (Angstroms) |           |           |
|------------------|------------------|----------------|-------------------------|-----------|-----------|
|                  |                  |                | X                       | Y         | Z         |
| 1                | 6                | 0              | -1.597906               | 3.203061  | 0.836924  |
| 2                | 6                | 0              | -0.707340               | 2.119209  | 0.830306  |
| 3                | 6                | 0              | -0.721363               | 1.193722  | -0.233099 |
| 4                | 6                | 0              | -1.645464               | 1.378548  | -1.281901 |
| 5                | 6                | 0              | -2.542978               | 2.457195  | -1.268845 |
| 6                | 6                | 0              | -2.520494               | 3.374983  | -0.207291 |
| 7                | 1                | 0              | -1.570699               | 3.917722  | 1.667399  |
| 8                | 1                | 0              | 0.013335                | 1.991183  | 1.643181  |
| 9                | 1                | 0              | -1.658512               | 0.668591  | -2.117789 |
| 10               | 1                | 0              | -3.251278               | 2.585783  | -2.095406 |
| 11               | 1                | 0              | -3.215426               | 4.222311  | -0.196293 |
| 12               | 6                | 0              | 0.211858                | -0.007114 | -0.297328 |
| 13               | 6                | 0              | 3.779008                | -0.271419 | -0.571141 |
| 14               | 6                | 0              | 4.474579                | -1.549014 | -1.066041 |
| 15               | 1                | 0              | 5.525966                | -1.332432 | -1.323752 |
| 16               | 1                | 0              | 4.460523                | -2.328902 | -0.285078 |
| 17               | 1                | 0              | 3.970501                | -1.945591 | -1.964540 |
| 18               | 6                | 0              | 4.430039                | 0.248685  | 0.720677  |
| 19               | 1                | 0              | 5.484766                | 0.518308  | 0.530636  |
| 20               | 1                | 0              | 3.904049                | 1.141937  | 1.094075  |
| 21               | 1                | 0              | 4.401058                | -0.523278 | 1.508302  |
| 22               | 6                | 0              | 3.750353                | 0.809146  | -1.664159 |
| 23               | 1                | 0              | 3.290311                | 0.415107  | -2.587757 |

|    |   |   |           |           |           |
|----|---|---|-----------|-----------|-----------|
| 24 | 1 | 0 | 3.166897  | 1.680586  | -1.324369 |
| 25 | 1 | 0 | 4.774779  | 1.145901  | -1.904317 |
| 26 | 8 | 0 | 2.411860  | -0.746749 | -0.308209 |
| 27 | 7 | 0 | 1.575238  | 0.334466  | 0.206781  |
| 28 | 8 | 0 | 1.458052  | 0.139572  | 1.624742  |
| 29 | 6 | 0 | -0.202319 | -1.248264 | 0.588197  |
| 30 | 6 | 0 | 0.617050  | -1.031831 | 1.871146  |
| 31 | 1 | 0 | -0.024368 | -0.788803 | 2.732928  |
| 32 | 1 | 0 | 0.329309  | -0.317171 | -1.345934 |
| 33 | 1 | 0 | 0.129550  | -2.153597 | 0.054449  |
| 34 | 6 | 0 | -1.702422 | -1.352630 | 0.829982  |
| 35 | 8 | 0 | -2.286102 | -1.077049 | 1.868723  |
| 36 | 8 | 0 | -2.323679 | -1.799892 | -0.298987 |
| 37 | 6 | 0 | -3.778141 | -1.881750 | -0.209127 |
| 38 | 1 | 0 | -4.172548 | -0.865991 | -0.031182 |
| 39 | 1 | 0 | -4.042945 | -2.502014 | 0.664805  |
| 40 | 6 | 0 | -4.282042 | -2.477261 | -1.514864 |
| 41 | 1 | 0 | -5.383159 | -2.554022 | -1.489105 |
| 42 | 1 | 0 | -4.000258 | -1.845541 | -2.374432 |
| 43 | 1 | 0 | -3.868860 | -3.487663 | -1.675756 |
| 44 | 1 | 0 | 1.254780  | -1.902334 | 2.101699  |

-----

|                                              |                              |
|----------------------------------------------|------------------------------|
| Zero-point correction=                       | 0.362058 (Hartree/Particle)  |
| Thermal correction to Energy=                | 0.384187                     |
| Thermal correction to Enthalpy=              | 0.385131                     |
| Thermal correction to Gibbs Free Energy=     | 0.308993                     |
| Sum of electronic and zero-point Energies=   | -978.751490                  |
| Sum of electronic and thermal Energies=      | -978.729361                  |
| Sum of electronic and thermal Enthalpies=    | -978.728417                  |
| Sum of electronic and thermal Free Energies= | -978.804555                  |
| BP86/6-311++G(d,p)/SMD//BP86/6-31G(d)        | energy in THF= -979.40706179 |
